# Supplementary material for: Spider phylogenomics: untangling the Spider Tree of Life
Source: PubMed Central journal article supplement (PMC4768681; doi:10.7717/peerj.1719), 2016-02-23
Supplement: peerj-04-1719-s001.pdf [file peerj-04-1719-s001.pdf]

**Color Key  
and Density Plot**

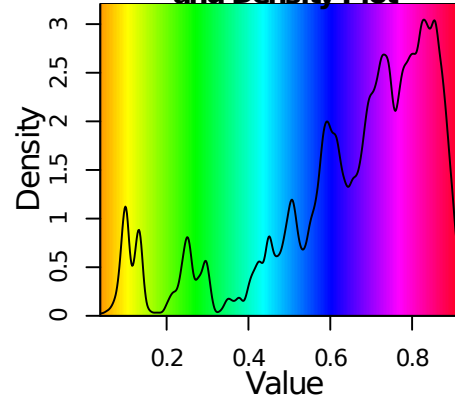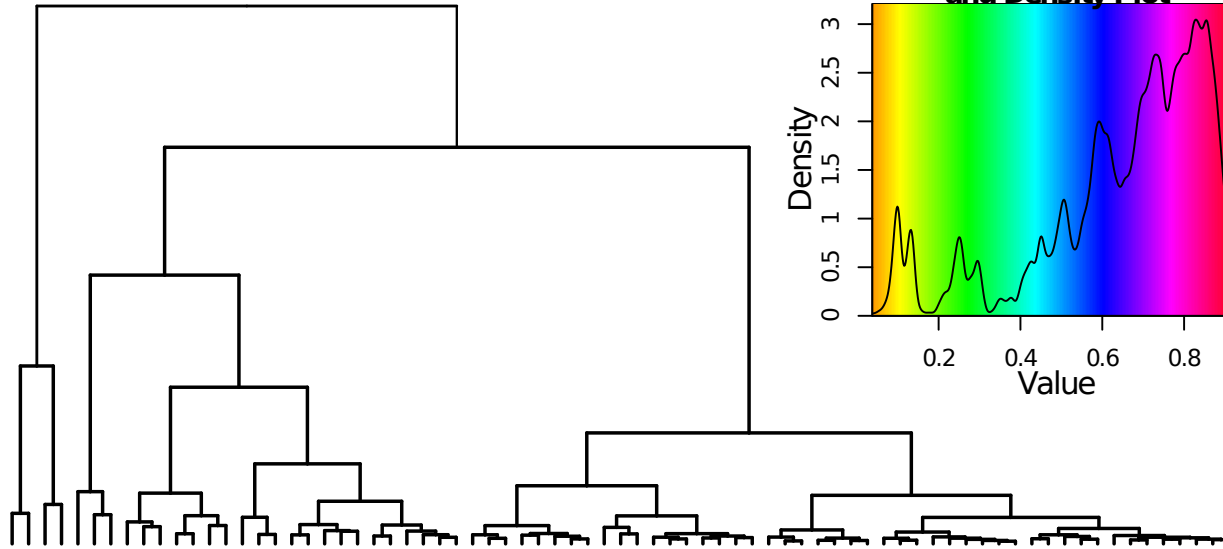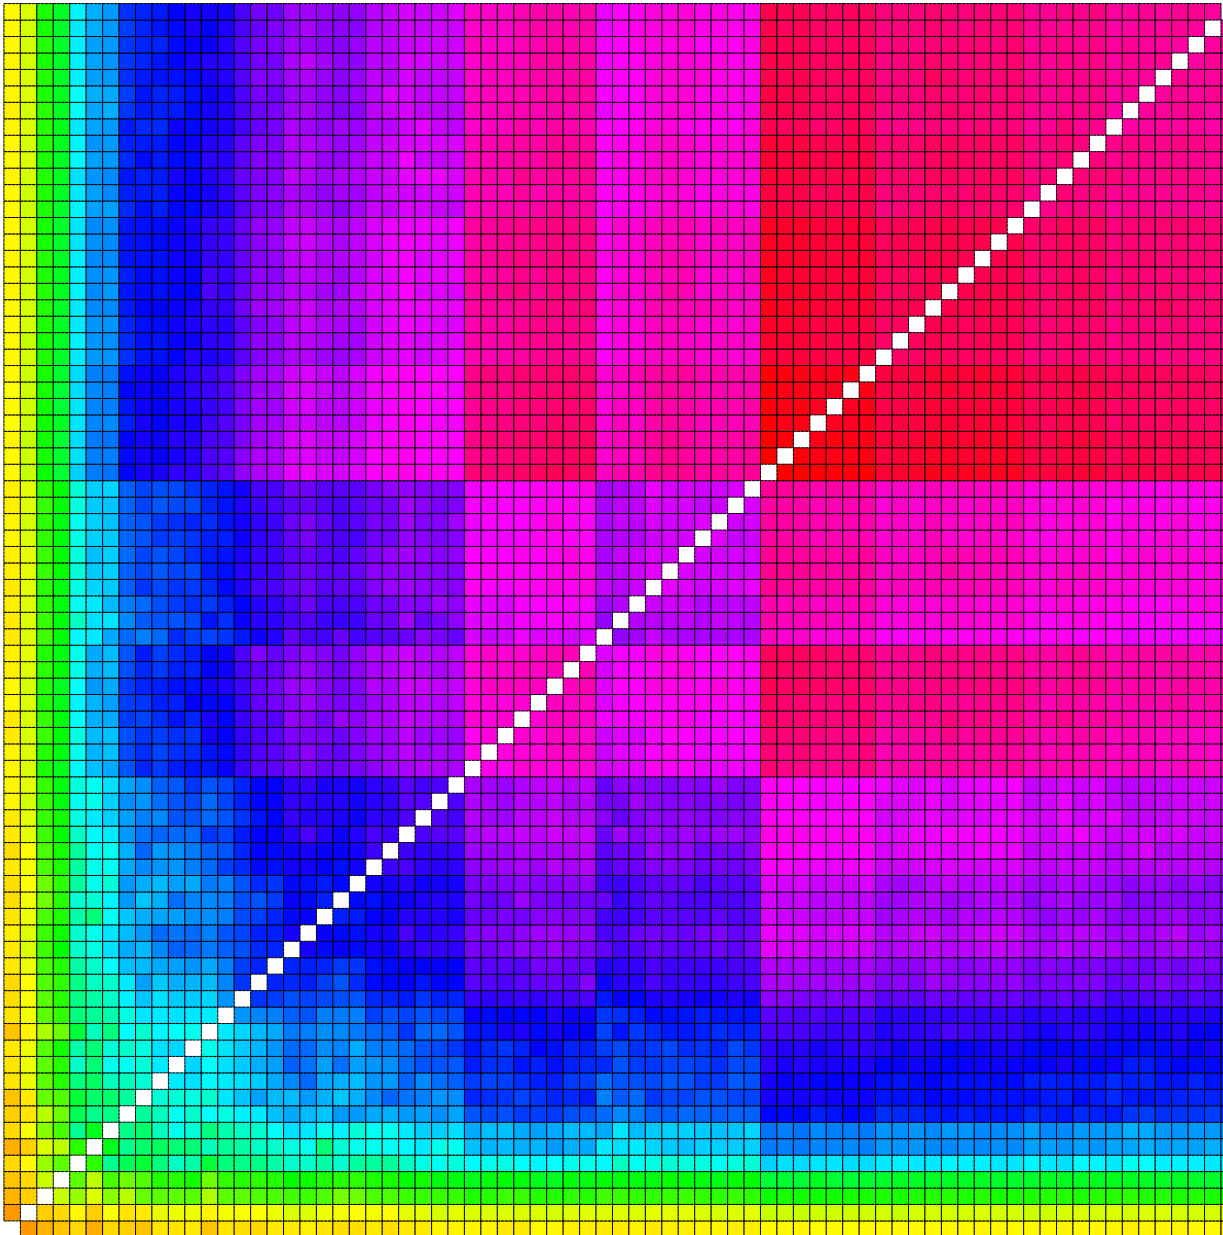

*Pholcus sp.*  
*Calleptoneta sp.*  
*Hypochilus pococki*  
*Agelenopsis emertoni*  
*Cicurina vibora*  
*Latrodectus tredecimguttatus*  
*Segestria sp.*  
*Hebestatis theveneti*  
*Kukulcania hibernalis*  
*Verrucosa arenata*  
*Brachythele longitarsus*  
*Promyrmekiaphila clathrata*  
*Leucauge venusta*  
*Sergiolus capulatus*  
*Theridion sp.*  
*Schizocosa rovnerei*  
*Ero leonina*  
*Pimoa sp.*  
*Habronattus signatus*  
*Frontinella communis*  
*Oecobius navus*  
*Loxosceles sp.*  
*Sphodros rufipes*  
*Megahexura fulva*  
*Nephila clavipes*  
*Nesticus cooperi*  
*Micrathena gracilis*  
*Tetragnatha versicolor*  
*Deinöpis longipes*  
*Microdipoena guttata*  
*Uloborus glomiosus*  
*Anahita punctulata*  
*Callobius sp.*  
*Scytodes thoracica*  
*Stegodyphus mimosarum*  
*Liphistius malayensis*  
*Antrodiaetus unicolor*  
*Hibana sp.*  
*Damarchus sp.*  
*Philopenella herediae*  
*Gasteracantha hasselti*  
*Badumna longinquus*  
*Peucetia longipalpis*  
*Trichopelma laselva*  
*Neoscona arabesca*  
*Acanthoscuria geniculata*  
*Microhexura montivaga*  
*Pholcus phalangoides*  
*Aliatypus coylei*  
*Aptostichus atomarius*  
*Dolomedes triton*  
*Tetranychus cinnabarinus*  
*Mastigoproctus giganteus*  
*Macracantha arcuata*  
*Aphonopelma iviei*  
*Metaltella simoni*  
*Homalonychus theologus*  
*Cyclocosmia truncata*  
*Amaurobius ferox*  
*Trachelas tranquillus*  
*Pisaurina mira*  
*Damon variegatus*  
*Calymmaria persica*  
*Calponia harrisonfordi*  
*Paratropis sp.*  
*Misumenoides formosipes*  
*Ixodes scapularis*  
*Aptostichus stephencolberti*  
*Idiops bersebaensis*  
*Metaltella simoni*  
*Pionothele nsp.*  
*Dysdera crocata*  
*Centruroides vittatus*  
*Liphistius sp.*  
*Digueta sp.*
