# Supplementary material for: Spider phylogenomics: untangling the Spider Tree of Life
Source: PubMed Central journal article supplement (PMC4768681; doi:10.7717/peerj.1719), 2016-02-23

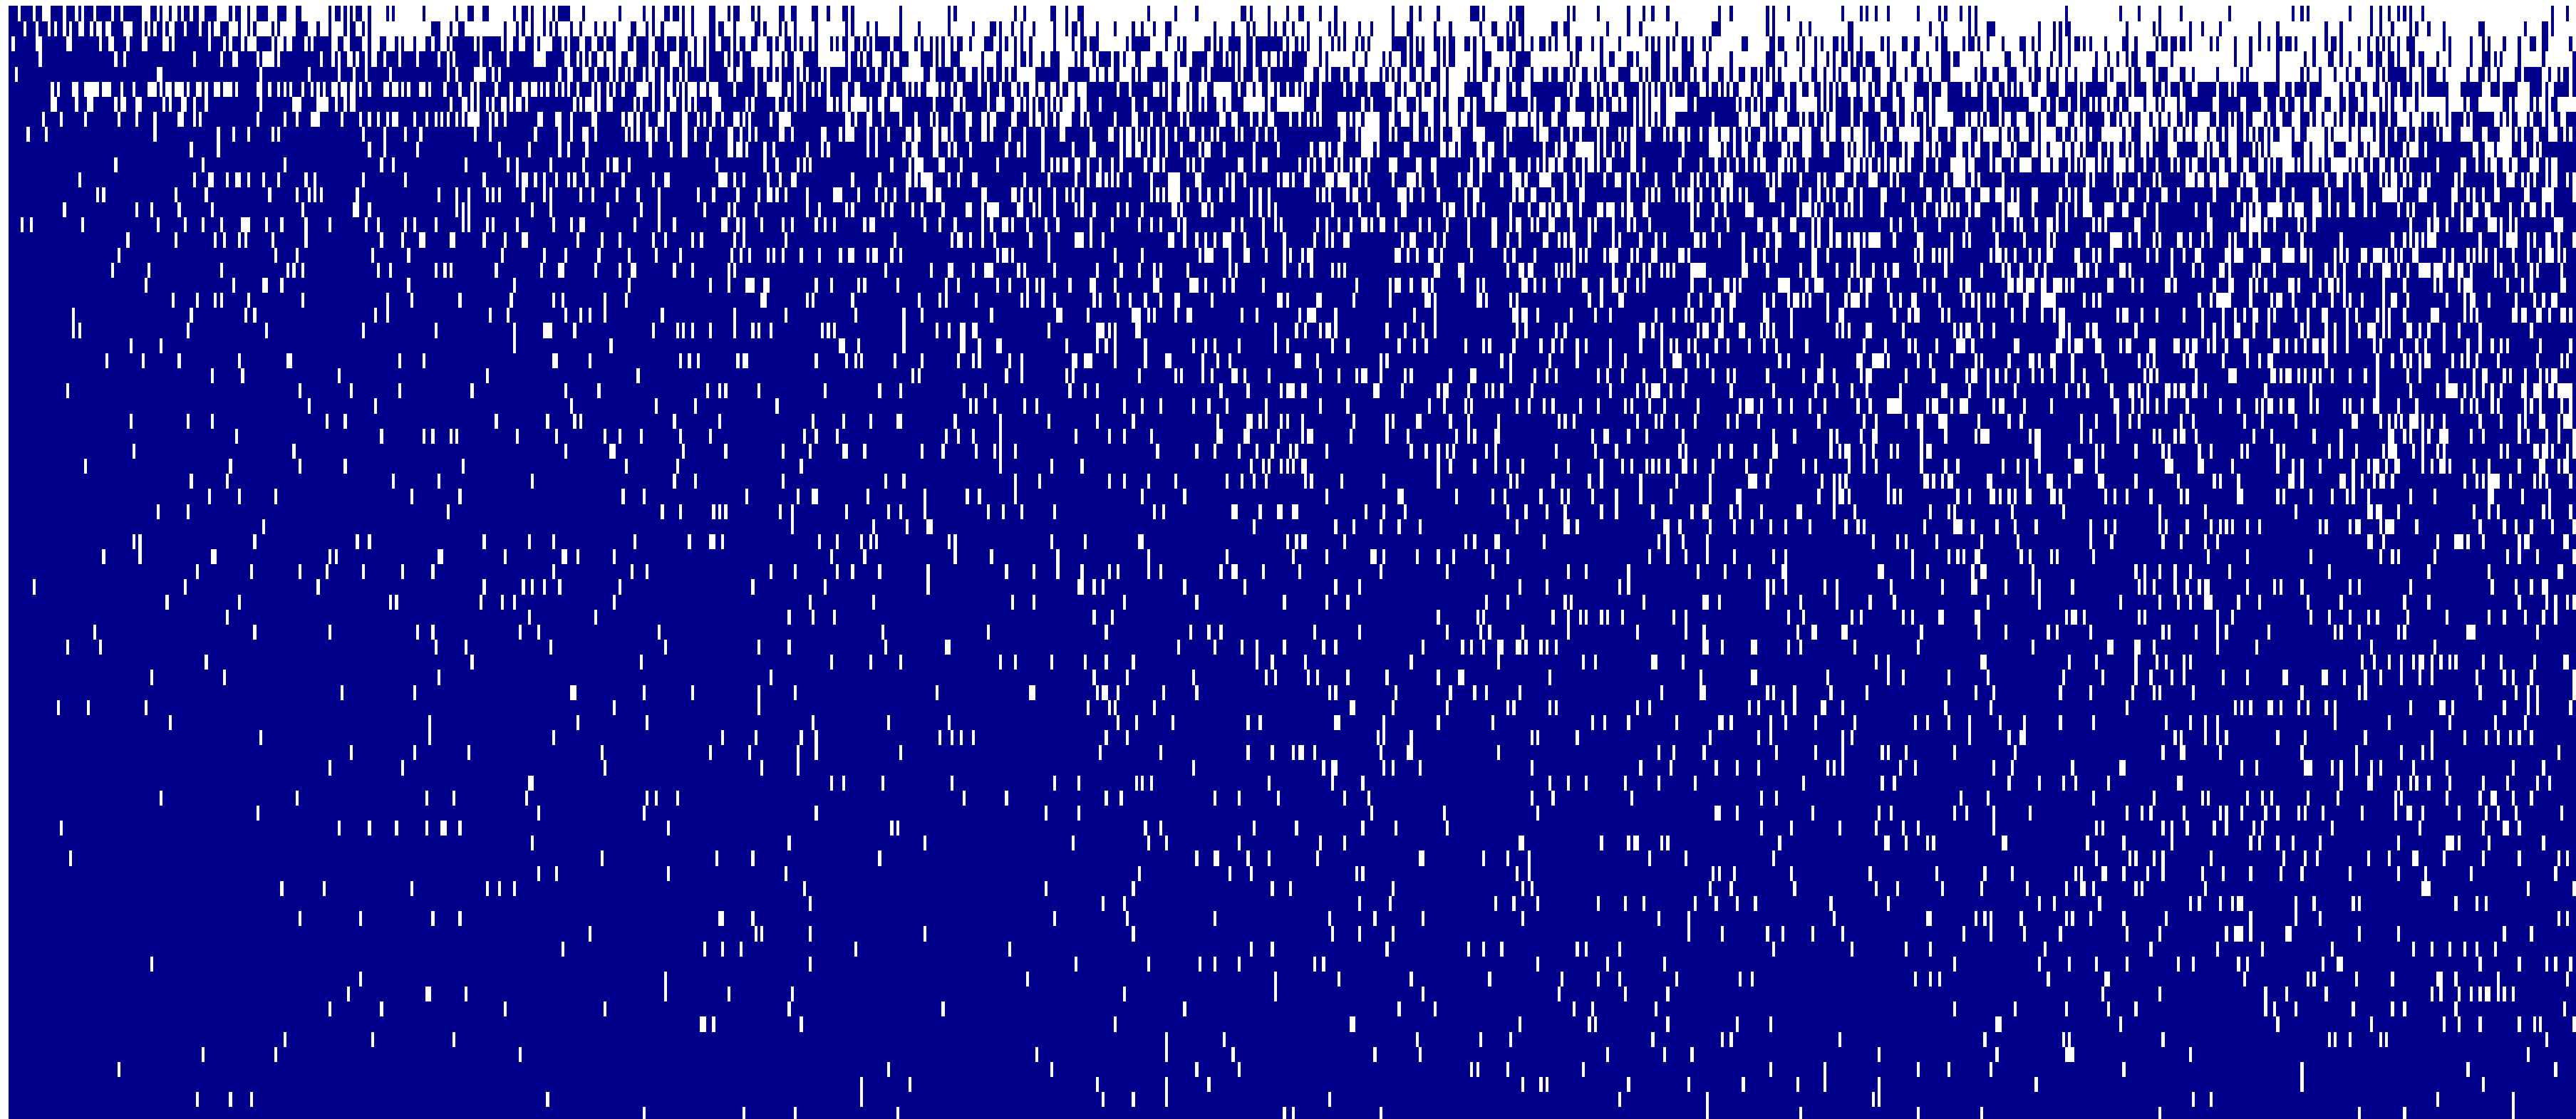

Supplement: peerj-04-1719-s009.pdf [file peerj-04-1719-s009.pdf]
