# Supplementary material for: Spider phylogenomics: untangling the Spider Tree of Life
Source: PubMed Central journal article supplement (PMC4768681; doi:10.7717/peerj.1719), 2016-02-23
Supplement: peerj-04-1719-s018.pdf [file peerj-04-1719-s018.pdf]

1 **SUPPLEMENTAL MATERIALS**

2 **Table 1.** Specimen locality data for newly sequenced transcriptomes.

| Family         | Genus               | Specific Epithet | Specimen ID | Locality                                                       | Latitude/Longitude      |
|----------------|---------------------|------------------|-------------|----------------------------------------------------------------|-------------------------|
| Agelenidae     | <i>Agelenopsis</i>  | <i>emertoni</i>  | AUMS5739    | Auburn, Lee Co, AL, USA                                        | 32.6028°N<br>85.4554°W  |
| Amaurobiidae   | <i>Callobius</i>    | <i>sp.</i>       | AUMS11930   | Muir Woods, Marin Co, CA, USA                                  | 37.8922°N<br>122.5717°W |
| Amphinectidae  | <i>Metaltella</i>   | <i>simoni</i>    | AUMS11905   | Auburn University, Lee Co, AL, USA                             | 32.5986°N<br>85.4833°W  |
| Amphinectidae  | <i>Metaltella</i>   | <i>simoni</i>    | AUMS11915   | San Diego Co, CA, USA                                          | NA                      |
| Antrodiaetidae | <i>Aliatypus</i>    | <i>coylei</i>    | AUMS56      | near Monterey, Monterey Co, CA, USA                            | 36.5714°N<br>121.9043°W |
| Antrodiaetidae | <i>Antrodiaetus</i> | <i>unicolor</i>  | MY2335      | near Hendersonville, Transylvania Co, NC, USA                  | 35.2192°N<br>82.7794°W  |
| Anyphaenidae   | <i>Hibana</i>       | <i>sp.</i>       | AUMS11902   | Louise Kreher Forest Ecology Preserve, Auburn, Lee Co, AL, USA | 32.6603°N<br>85.4836°W  |
| Araneidae      | <i>Micrathena</i>   | <i>gracilis</i>  | AUMS5620    | Dadeville, Co, AL, USA                                         | 32.8318°N<br>85.7636°W  |
| Araneidae      | <i>Verrucosa</i>    | <i>arenata</i>   | AUMS11901   | Louise Kreher Forest Ecology Preserve, Auburn, Lee Co, AL, USA | 32.6603°N<br>85.4836°W  |
| Atypidae       | <i>Sphodros</i>     | <i>rufipes</i>   | AUMS146     | EV Smith Research Station, Macon Co, AL, USA                   | 32.4257°N<br>85.9015°W  |
| Barychelidae   | <i>Trichopelma</i>  | <i>laselva</i>   | AUMS8485    | La Selva, CR                                                   | 10.4295°N<br>84.0095°W  |

Supplemental Table 1 – continued from previous page

| Family       | Genus              | Specific Epithet       | Specimen ID  | Locality                                             | Latitude/Longitude      |
|--------------|--------------------|------------------------|--------------|------------------------------------------------------|-------------------------|
| Caponiidae   | <i>Calponia</i>    | <i>harrisonfordi</i>   | 1347-JML-001 | Russian Ridge Open Space Park, San Mateo Co, CA, USA | 37.3149°N<br>122.1872°W |
| Ctenidae     | <i>Anahita</i>     | <i>punctulata</i>      | AUMS11932    | Auburn, Lee Co, AL, USA                              | 32.6028°N<br>85.4554°W  |
| Ctenizidae   | <i>Cyclocosmia</i> | <i>truncata</i>        | AUMS120      | Grove Hill, Auburn, Lee Co, AL, USA                  | 32.5841°N<br>85.4604°W  |
| Ctenizidae   | <i>Hebestatis</i>  | <i>theveneti</i>       | AUMS152      | Tuolumne Co, CA, USA                                 | 38.0453°N<br>119.9747°W |
| Deinopidae   | <i>Deinopis</i>    | <i>longipes</i>        | AUMS8783     | La Selva, CR                                         | 10.4295°N<br>84.0095°W  |
| Desidae      | <i>Badumna</i>     | <i>longinqua</i>       | AUMS11914    | Petaluma, Sonoma Co, CA, USA                         | 38.2247°N<br>122.6264°W |
| Dictynidae   | <i>Cicurina</i>    | <i>vibora</i>          | HED003       | Temples of Thor Cave, Williamson Co, TX, USA         | NA                      |
| Diguetidae   | <i>Diguetia</i>    | <i>sp.</i>             | AUMS11919    | Iperial Co, CA, USA                                  | NA                      |
| Dipluridae   | <i>Microhexura</i> | <i>montivaga</i>       | HED001       | Mt Gibbes, Mt Mitchell SP, Yancey Co, NC, USA        | 35.7394°N<br>82.2850°W  |
| Dysderidae   | <i>Dysdera</i>     | <i>crocata</i>         | AUMS11924    | Golden Gate Park, San Francisco Co, CA, USA          | 37.7686°N<br>122.4659°W |
| Euctenizidae | <i>Aptostichus</i> | <i>atomarius</i>       | MY4002       | Winchester, Riverside Co, CA, USA                    | 33.7069°N<br>117.0844°W |
| Euctenizidae | <i>Aptostichus</i> | <i>stephencolberti</i> | AUMS20       | Marina Dunes State Park, Monterey Co, CA, USA        | 36.7035°N<br>121.8068°W |

Supplemental Table 1 – continued from previous page

| Family           | Genus                   | Specific Epithet    | Specimen ID  | Locality                                    | Latitude/Longitude      |
|------------------|-------------------------|---------------------|--------------|---------------------------------------------|-------------------------|
| Euctenizidae     | <i>Promyrmekiaphila</i> | <i>clathrata</i>    | AUMS5761     | near Cazadero, Sonoma Co, CA, USA           | 38.5231°N<br>123.0845°W |
| Filistatidae     | <i>Kukulcania</i>       | <i>hibernalis</i>   | AUMS8597     | Auburn, Lee Co, AL, USA                     | 32.6094°N<br>85.4544°W  |
| Gnaphosidae      | <i>Sergiolus</i>        | <i>capulatus</i>    | AUMS5674     | Opelika, Lee Co, AL, USA                    | 32.6887°N<br>85.4012°W  |
| Hahniidae        | <i>Calymmaria</i>       | <i>persica</i>      | AUMS11926    | Petaluma, Sonoma Co, CA, USA                | 38.2247°N<br>122.6264°W |
| Homalonychidae   | <i>Homalonychus</i>     | <i>theologus</i>    | AUMS11917    | Imperial Co, CA, USA                        | NA                      |
| Hypochilidae     | <i>Hypochilus</i>       | <i>pococki</i>      | AUMS155      | Laurel Falls Trail, Sevier Co, TN, USA      | 35.6782°N<br>83.5929°W  |
| Idiopidae        | <i>Idiops</i>           | <i>bersebaensis</i> | AUMS6746     | Namibia, Africa                             | 17.0021°S<br>13.2445°E  |
| Leptonetidae     | <i>Calileptoneta</i>    | <i>californica</i>  | 1348-JML-001 | Mount Diablo State Park, Contra Co, CA, USA | 37.8745°N<br>121.9616°W |
| Linyphiidae      | <i>Frontinella</i>      | <i>communis</i>     | AUMS5733     | Auburn University, Lee Co, AL, USA          | 32.5987°N<br>85.4835°W  |
| Liphistiidae     | <i>Liphistius</i>       | <i>sp.</i>          | AUMS5743     | Thailand                                    | NA                      |
| Lycosidae        | <i>Schizocosa</i>       | <i>rovneri</i>      | AUMS5122     | Oxford, Lafayette Co, MS, USA               | 32.4116°N<br>89.4183°W  |
| Mecicobothriidae | <i>Megahexura</i>       | <i>fulva</i>        | AUMS154      | East of Groveland, Tuolumne Co, CA, USA     | 38.0453°N<br>119.9747°W |
| Mimetidae        | <i>Ero</i>              | <i>leonina</i>      | AUMS8817     | Tuskegee National Forest, Macon Co, AL, USA | 32.4418°N<br>85.6328°W  |
| Nemesiidae       | <i>Calisoga</i>         | <i>longitarsis</i>  | AUMS47       | Jasper Ridge, San Mateo Co, CA, USA         | 37.4132°N<br>122.2050°W |

Supplemental Table 1 – continued from previous page

| Family         | Genus              | Specific Epithet     | Specimen ID          | Locality                                                                        | Latitude/Longitude      |
|----------------|--------------------|----------------------|----------------------|---------------------------------------------------------------------------------|-------------------------|
| Nemesiidae     | <i>Damarchus</i>   | <i>sp.</i>           | AUMS5127             | Ramnagar<br>Nepal                                                               | NA                      |
| Nemesiidae     | <i>Pionothele</i>  | <i>n.sp.</i>         | AUMS6718             | Namibia,<br>Africa                                                              | 23.5698°S<br>15.0398°E  |
| Nephilidae     | <i>Nephila</i>     | <i>clavipes</i>      | AUMS5736             | Donald<br>E. Davis<br>Arboretum,<br>Auburn<br>University,<br>Lee Co, AL,<br>USA | 32.5950°N<br>85.4834°W  |
| Nesticidae     | <i>Nesticus</i>    | <i>cooperi</i>       | HED002               | Nantahala<br>River Gorge,<br>Swain Co,<br>NC, USA                               | 35.4111°N<br>83.5220°W  |
| Oecobiidae     | <i>Oecobius</i>    | <i>navus</i>         | AUMS5741             | Auburn<br>University,<br>Lee Co, AL,<br>USA                                     | 32.6000°N<br>85.4823°W  |
| Oxyopidae      | <i>Peucetia</i>    | <i>longipalpis</i>   | AUMS5740             | Opelika,<br>Lee Co, AL,<br>USA                                                  | 32.6887°N<br>85.4012°W  |
| Paratropididae | <i>Paratropis</i>  | <i>sp.</i>           | AUMS148              | Socotá, De-<br>partamento<br>Boyaca,<br>Columbia                                | 6.08976°N<br>72.6198°W  |
| Pholcidae      | <i>Pholcus</i>     | <i>phalangioides</i> | AUMS5732             | Auburn<br>University,<br>Lee Co, AL,<br>USA                                     | 32.6000°N<br>85.4823°W  |
| Pholcidae      | <i>Pholcus</i>     | <i>phalangioides</i> | 1304-<br>JML-<br>001 | Petaluma,<br>Sonoma Co,<br>CA, USA                                              | 38.2247°N<br>122.6264°W |
| Pimoidae       | <i>Pimoa</i>       | <i>sp.</i>           | AUMS14951            | Del Norte<br>Co, CA                                                             | NA                      |
| Pisauridae     | <i>Dolomedes</i>   | <i>triton</i>        | AUMS11906            | Opelika,<br>Lee Co, AL,<br>USA                                                  | 32.6544°N<br>85.3973°W  |
| Salticidae     | <i>Habronattus</i> | <i>signatus</i>      | HED004               | Ocotillo,<br>Imperial Co,<br>CA, USA                                            | 32.7386°N<br>115.9941°W |
| Scytodidae     | <i>Scytodes</i>    | <i>thoracica</i>     | AUMS5673             | Grove Hill,<br>Lee Co, AL,<br>USA                                               | 32.5841°N<br>85.4604°W  |
| Segestriidae   | <i>Segestria</i>   | <i>sp.</i>           | AUMS11925            | Golden Gate<br>Park, San<br>Francisco,<br>CA, USA                               | 37.7686°N<br>122.4659°W |



Supplemental Table 1 – continued from previous page

| Family         | Genus               | Specific Epithet  | Specimen ID  | Locality                                                      | Latitude/Longitude      |
|----------------|---------------------|-------------------|--------------|---------------------------------------------------------------|-------------------------|
| Sicariidae     | <i>Loxosceles</i>   | <i>deserta</i>    | 1346-JML-001 | Yarnell, Yavapai Co, AZ                                       | 32.0756°N<br>110.6258°W |
| Tetragnathidae | <i>Leucauge</i>     | <i>venusta</i>    | AUMS11903    | Chewacla State Park, Auburn, Lee Co, AL, USA                  | 32.5536°N<br>85.4845°W  |
| Tetragnathidae | <i>Tetragnatha</i>  | <i>versicolor</i> | AUMS5738     | Donald E. Davis Arboretum, Auburn University, Lee Co, AL, USA | 32.5950°N<br>85.4834°W  |
| Theraphosidae  | <i>Aphonopelma</i>  | <i>iviei</i>      | APH2038      | East of Plymouth, Amador Co, CA, USA                          | 38.4759°N<br>120.8230°W |
| Theridiidae    | <i>Theridion</i>    | <i>sp.</i>        | AUMS5737     | Donald E. Davis Arboretum, Auburn University, AL, USA         | 32.5950°N<br>85.4834°W  |
| Thomisidae     | <i>Misumenoides</i> | <i>formosipes</i> | AUMS6454     | Opelika, Lee Co, AL, USA                                      | 32.6887°N<br>85.4012°W  |
| Uloboridae     | <i>Philopenella</i> | <i>herediae</i>   | AUMS8784     | La Selva, CR                                                  | 10.4295°N<br>84.0095°W  |
| Uloboridae     | <i>Uloborus</i>     | <i>glomosus</i>   | AUMS11904    | Chewacla State Park, Auburn, Lee Co, AL, USA                  | 32.5536°N<br>85.4845°W  |

**Table 2.** Transcriptome sequence and assembly data.

| Family         | Species                       | Reads    | Contigs | Ave. Len. | TransDecoder | ARTH | SPID |
|----------------|-------------------------------|----------|---------|-----------|--------------|------|------|
| Agelenidae     | <i>Agelenopsis emertoni</i>   | 27264400 | 20517   | 719.7     | 8192         | 751  | 2613 |
| Amaurobiidae   | <i>Amaurobius ferox</i>       | 12549070 | 202311  | 530.8     | 35361        | 976  | 3247 |
| Amaurobiidae   | <i>Callobius sp.</i>          | 26240373 | 62055   | 499       | 21591        | 919  | 3401 |
| Amphinectidae  | <i>Metaltella simoni</i>      | 14728368 | 42301   | 574.7     | 18716        | 889  | 3039 |
| Amphinectidae  | <i>Metaltella simoni</i>      | 12935049 | 62734   | 612.4     | 23086        | 950  | 3174 |
| Antrodiaetidae | <i>Aliatypus coylei</i>       | 29958173 | 23447   | 744.6     | 6098         | 695  | 2222 |
| Antrodiaetidae | <i>Antrodiaetus unicolor</i>  | 32624239 | 14062   | 550.2     | 9850         | 756  | 2745 |
| Anyphaenidae   | <i>Hibana sp.</i>             | 40346328 | 55291   | 615.1     | 15212        | 909  | 2789 |
| Araneidae      | <i>Verrucosa arenata</i>      | 14468378 | 94721   | 911.9     | 41450        | 976  | 3993 |
| Araneidae      | <i>Gasteracantha hasselti</i> | 12564452 | 50554   | 858.2     | 19944        | 978  | 4020 |
| Araneidae      | <i>Macracantha arcuata</i>    | 17523883 | 34411   | 787.9     | 16560        | 949  | 3826 |
| Araneidae      | <i>Neoscona arabesca</i>      | 28551664 | 161311  | 745.6     | 47096        | 992  | 3834 |
| Araneidae      | <i>Micrathena gracilis</i>    | 56963267 | 38210   | 856.6     | 16269        | 935  | 3719 |
| Atypidae       | <i>Sphodros rufipes</i>       | 51968533 | 27266   | 715.5     | 11504        | 915  | 3704 |
| Barychelidae   | <i>Trichopelma laselva</i>    | 27264400 | 33544   | 665.4     | 9061         | 807  | 2861 |
| Buthidae       | <i>Centruroides vittatus</i>  | 45691843 | 17788   | 378.2     | 4854         | 660  | 1099 |
| Caponiidae     | <i>Calponia harrisonfordi</i> | 59921781 | 14397   | 542.1     | 4297         | 551  | 1604 |
| Ctenidae       | <i>Anahita punctulata</i>     | 44538794 | 75653   | 483.4     | 23111        | 961  | 3407 |
| Ctenizidae     | <i>Cyclocosmia truncata</i>   | 33664901 | 26408   | 604.7     | 8446         | 736  | 2679 |
| Ctenizidae     | <i>Hebestatis theveneti</i>   | 40097804 | 16167   | 650       | 6711         | 713  | 2647 |
| Deinopidae     | <i>Deinopis longipes</i>      | 39222056 | 36976   | 705.7     | 12764        | 880  | 3375 |
| Desidae        | <i>Badumna longinqua</i>      | 16455974 | 85746   | 661.9     | 34737        | 968  | 3557 |
| Dictynidae     | <i>Cicurina vibora</i>        | 29071083 | 175943  | 412.7     | 20256        | 852  | 3293 |
| Diguetidae     | <i>Diguetia sp.</i>           | 19838746 | 6816    | 306.9     | 1368         | 309  | 457  |
| Dipluridae     | <i>Microhexura montivaga</i>  | 24680385 | 19680   | 635.8     | 8286         | 761  | 2695 |

Supplemental Table 2 – continued from previous page

| Family           | Species                            | Reads     | Contigs | Ave. Len. | TransDecoder | ARTH | SPID |
|------------------|------------------------------------|-----------|---------|-----------|--------------|------|------|
| Dysderidae       | <i>Dysdera crocata</i>             | 1718572   | 18286   | 452.8     | 5058         | 566  | 932  |
| Eresidae         | <i>Stegodyphus mimosarum</i>       | NA        | NA      | NA        | 26888        | 965  | 4055 |
| Euctenizidae     | <i>Aptostichus atomarius</i>       | 27431535  | 14152   | 709.2     | 5795         | 643  | 2149 |
| Euctenizidae     | <i>Aptostichus stephencolberti</i> | 30904990  | 13267   | 779.5     | 5344         | 589  | 1944 |
| Euctenizidae     | <i>Promyrmekia-phila clathrata</i> | 24733435  | 22423   | 669.4     | 8445         | 758  | 2646 |
| Filistatidae     | <i>Kukulcania hibernalis</i>       | 42693292  | 29491   | 702.4     | 11121        | 835  | 3141 |
| Gnaphosidae      | <i>Sergiolus capulatus</i>         | 32765239  | 28757   | 725.6     | 11340        | 820  | 2989 |
| Hahniidae        | <i>Calymmaria persica</i>          | 19286137  | 110707  | 644.9     | 20501        | 982  | 2165 |
| Homalonychidae   | <i>Homalonychus theologus</i>      | 31165362  | 40734   | 462.1     | 13258        | 933  | 3167 |
| Hypochilidae     | <i>Hypochilus pococki</i>          | 25747925  | 19793   | 540.2     | 7561         | 796  | 2860 |
| Idiopidae        | <i>Idiops bersebaensis</i>         | 23040778  | 6270    | 649.1     | 2897         | 421  | 1151 |
| Ixodidae         | <i>Ixodes scapularis</i>           | NA        | 18810   | 668.4     | 17799        | 815  | 2726 |
| Leptonetidae     | <i>Calileptoneta californica</i>   | 59806212  | 37641   | 582       | 11687        | 875  | 3240 |
| Linyphiidae      | <i>Frontinella communis</i>        | 28476743  | 27195   | 757.1     | 11753        | 862  | 3126 |
| Liphistiidae     | <i>Liphistius sp.</i>              | 54043289  | 7830    | 370.5     | 1938         | 333  | 667  |
| Liphistiidae     | <i>Liphistius malayanus</i>        | 62897982  | 83669   | 515.4     | 19784        | 941  | 3568 |
| Lycosidae        | <i>Schizocosa rovneri</i>          | 132349831 | 42744   | 871.6     | 14965        | 911  | 3584 |
| Mecicobothriidae | <i>Megahexura fulva</i>            | 59599533  | 40526   | 671.9     | 15303        | 964  | 4147 |
| Mimetidae        | <i>Ero leonina</i>                 | 32363996  | 78785   | 801.7     | 24565        | 980  | 3971 |
| Mysmenidae       | <i>Microdipoena guttata</i>        | 16972695  | 156439  | 617.5     | 70785        | 998  | 3940 |
| Nemesiidae       | <i>Calisoga longitarsis</i>        | 30773715  | 20721   | 574.8     | 7674         | 743  | 2635 |
| Nemesiidae       | <i>Damarchus sp.</i>               | 21876221  | 13519   | 707.8     | 5558         | 623  | 2089 |
| Nemesiidae       | <i>Pionothele n.sp.</i>            | 20155275  | 5158    | 631.7     | 2283         | 368  | 970  |
| Nephilidae       | <i>Nephila clavipes</i>            | 34853551  | 32305   | 753.9     | 15200        | 935  | 3653 |
| Nesticidae       | <i>Nesticus cooperi</i>            | 20188741  | 41169   | 714       | 15744        | 945  | 3715 |

Supplemental Table 2 – continued from previous page

| Family         | Species                             | Reads    | Contigs | Ave. Len. | TransDecoder | ARTH | SPID |
|----------------|-------------------------------------|----------|---------|-----------|--------------|------|------|
| Oecobiidae     | <i>Oecobius navus</i>               | 25031200 | 24989   | 695.4     | 12582        | 881  | 3183 |
| Oxyopidae      | <i>Peucetia longipalpis</i>         | 23273514 | 18810   | 668.4     | 7994         | 737  | 2536 |
| Paratropididae | <i>Paratropis sp.</i>               | 18409810 | 9021    | 605       | 3694         | 473  | 1463 |
| Pholcidae      | <i>Pholcus phalangoides</i>         | 24861584 | 17870   | 556.9     | 6698         | 703  | 3183 |
| Pholcidae      | <i>Pholcus phalangoides</i>         | 58019035 | 40396   | 760.8     | 11883        | 902  | 2129 |
| Phrynichidae   | <i>Damon variegatus</i>             | 64733221 | 83669   | 515.4     | 27304        | 944  | 3327 |
| Pimoidae       | <i>Pimoa sp.</i>                    | 46352103 | 160889  | 978.3     | 47496        | 998  | 3915 |
| Pisauridae     | <i>Dolomedes triton</i>             | 13590617 | 81075   | 625.3     | 32520        | 951  | 3209 |
| Pisauridae     | <i>Pisaurina mira</i>               | 6887470  | 129530  | 563.8     | 27116        | 958  | 3219 |
| Salticidae     | <i>Habronattus signatus</i>         | 75391275 | 26276   | 574.9     | 10447        | 843  | 3259 |
| Scytodidae     | <i>Scytodes thoracica</i>           | 30924460 | 59599   | 855.7     | 18223        | 962  | 3657 |
| Segestriidae   | <i>Segestria sp.</i>                | 38407502 | 191839  | 708.3     | 54753        | 987  | 3804 |
| Sicariidae     | <i>Loxosceles deserta</i>           | 61963685 | 40702   | 582.5     | 11078        | 876  | 3256 |
| Tetragnathidae | <i>Leucauge venusta</i>             | 15567091 | 127727  | 919       | 51004        | 988  | 3972 |
| Tetragnathidae | <i>Tetragnatha versicolor</i>       | 33465090 | 34328   | 815.4     | 15917        | 938  | 3672 |
| Tetranychidae  | <i>Tetranychus cinnabarinus</i>     | 26040173 | 30288   | 963.8     | 17083        | 938  | 3063 |
| Thelyphonidae  | <i>Mastigoproctus giganteus</i>     | 25983006 | 157263  | 623.7     | 43626        | 994  | 3785 |
| Theraphosidae  | <i>Acanthoscurria geniculata</i>    | NA       | NA      | NA        | 76237        | 933  | 4249 |
| Theraphosidae  | <i>Aphonopelma iviei</i>            | 36326210 | 13442   | 605.1     | 4717         | 596  | 2035 |
| Theridiidae    | <i>Latrodectus tredecimguttatus</i> | 27605467 | 10259   | 1110.6    | 9266         | 904  | 3399 |
| Theridiidae    | <i>Theridion sp.</i>                | 37459365 | 24669   | 733.7     | 10013        | 800  | 2810 |
| Thomisidae     | <i>Misumenoides formosipes</i>      | 25351927 | 58396   | 570.4     | 21546        | 810  | 2161 |
| Trachelidae    | <i>Trachelas tranquillus</i>        | 15506968 | 118533  | 467.9     | 30037        | 950  | 3546 |
| Uloboridae     | <i>Philoponella herediae</i>        | 47234871 | 40659   | 655.9     | 16468        | 947  | 3656 |
| Uloboridae     | <i>Uloborus glomosus</i>            | 12362545 | 114137  | 657       | 40782        | 970  | 3810 |

5 **Supplemental Table 3**

6 See /Supplemental\_Material/AnnotationTable\_S3.tex :too large to compile within main.tex

7

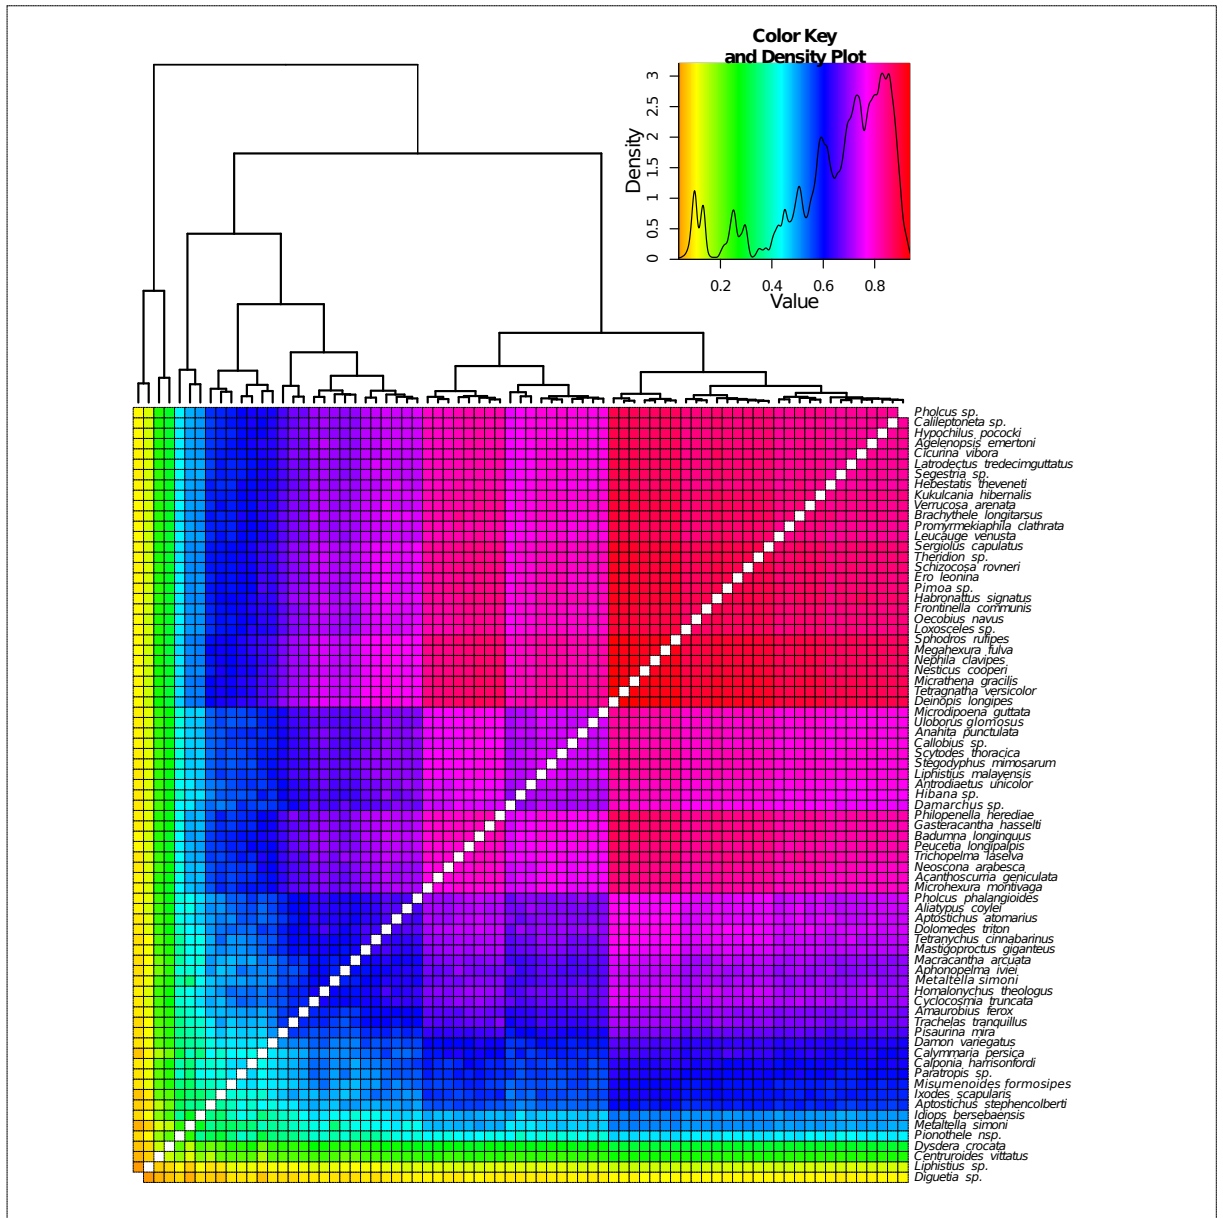

**Figure 1.** Clustering/heatmap analysis depicting degree of shared data between each species pair; missing data reduction (matrix 3, Table 2). Degree of positive data overlap indicated by a color-coded heatmap (yellow = low, red = high); species order from right to left in the same order as listed from top to bottom on right side of figure. Lack of phylogenetic clustering indicates bias from shared data does not explain relationships seen in phylogenomic analyses.

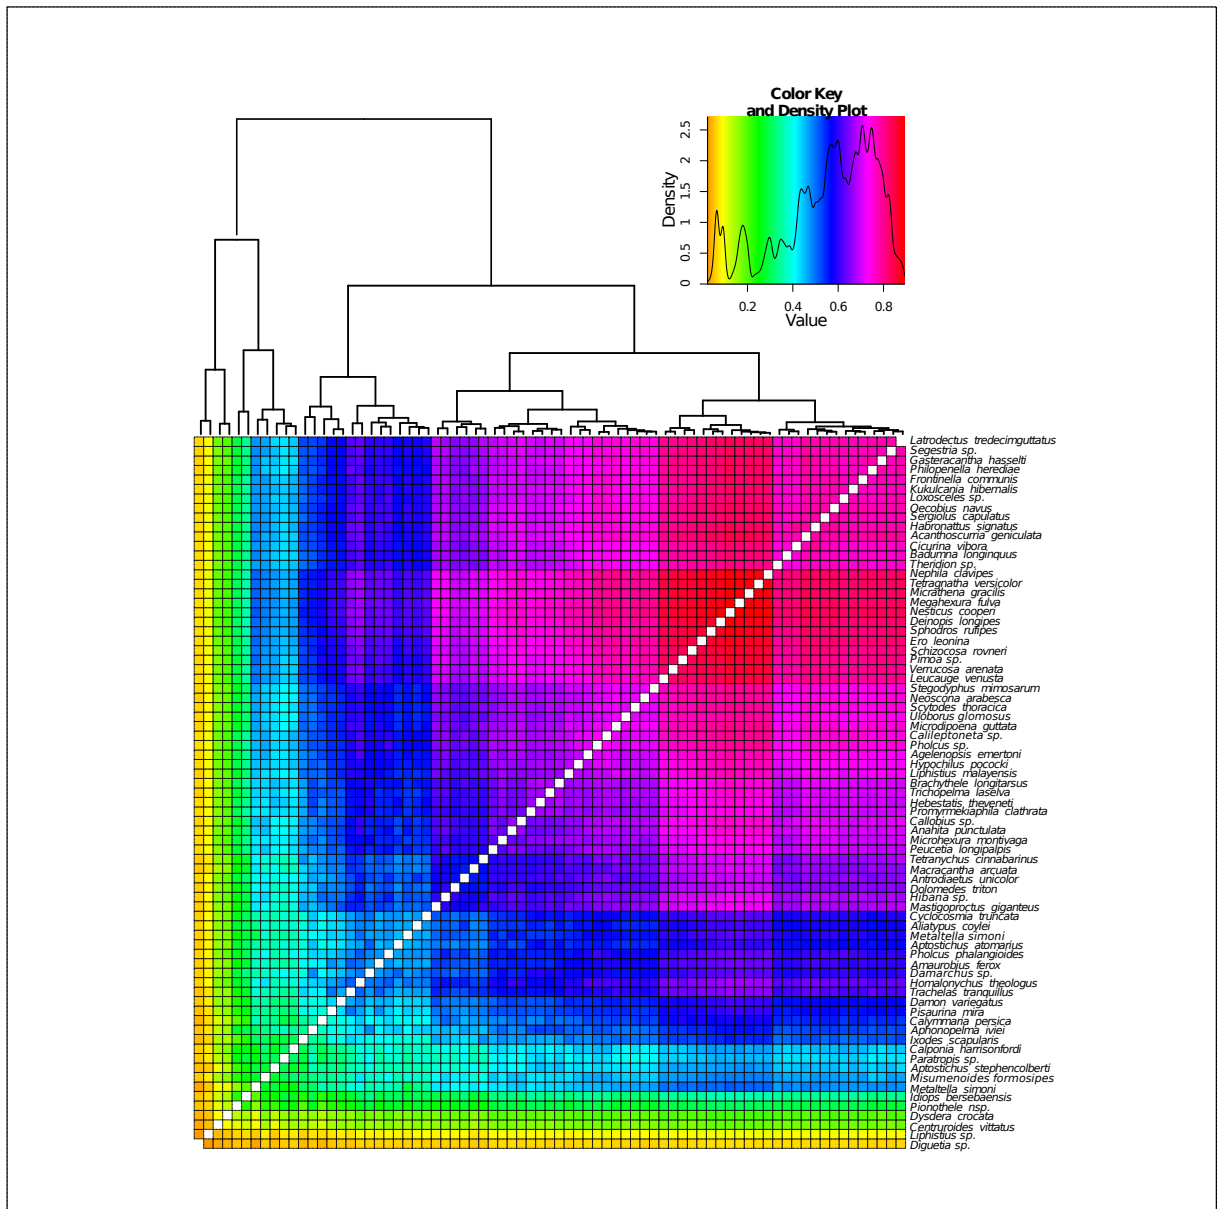

**Figure 2.** Clustering/heatmap analysis depicting degree of shared data between each species pair; missing data reduction (matrix 2, Table 2). Degree of positive data overlap indicated by a color-coded heatmap (yellow = low, red = high); species order from right to left in the same order as listed from top to bottom on right side of figure. Lack of phylogenetic clustering indicates bias from shared data does not explain relationships seen in phylogenomic analyses.

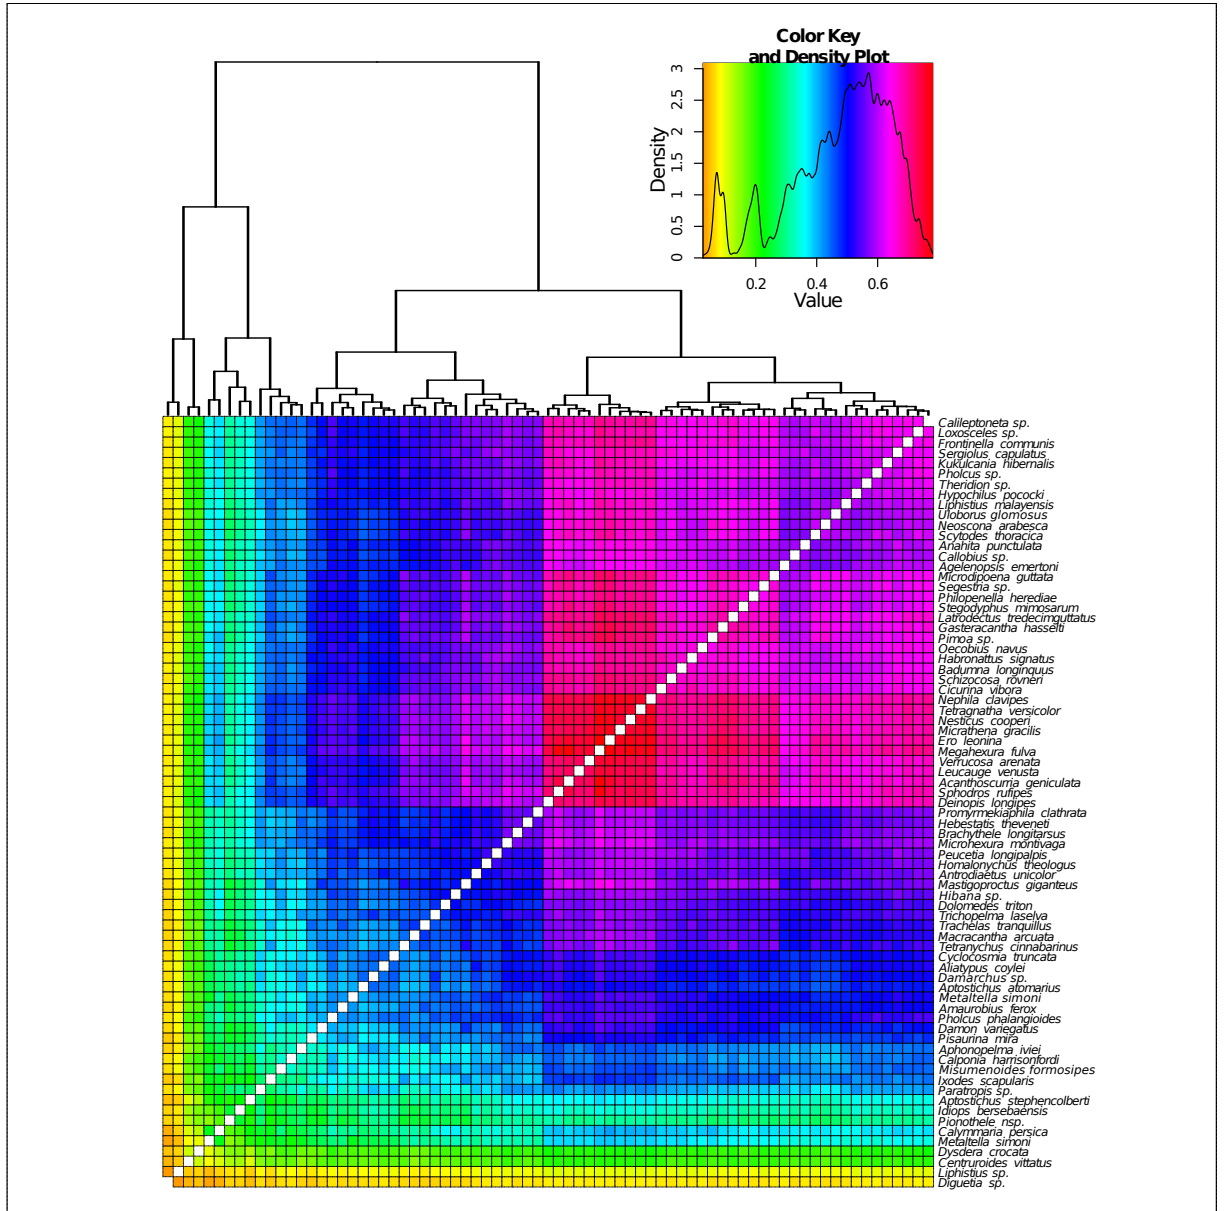

**Figure 3.** Clustering/heatmap analysis depicting degree of shared data between each species pair; BaCoCa reduced matrix (matrix 4, Table 2). Degree of positive data overlap indicated by a color-coded heatmap (yellow = low, red = high); species order from right to left in the same order as listed from top to bottom on right side of figure. Lack of phylogenetic clustering indicates bias from shared data does not explain relationships seen in phylogenomic analyses.



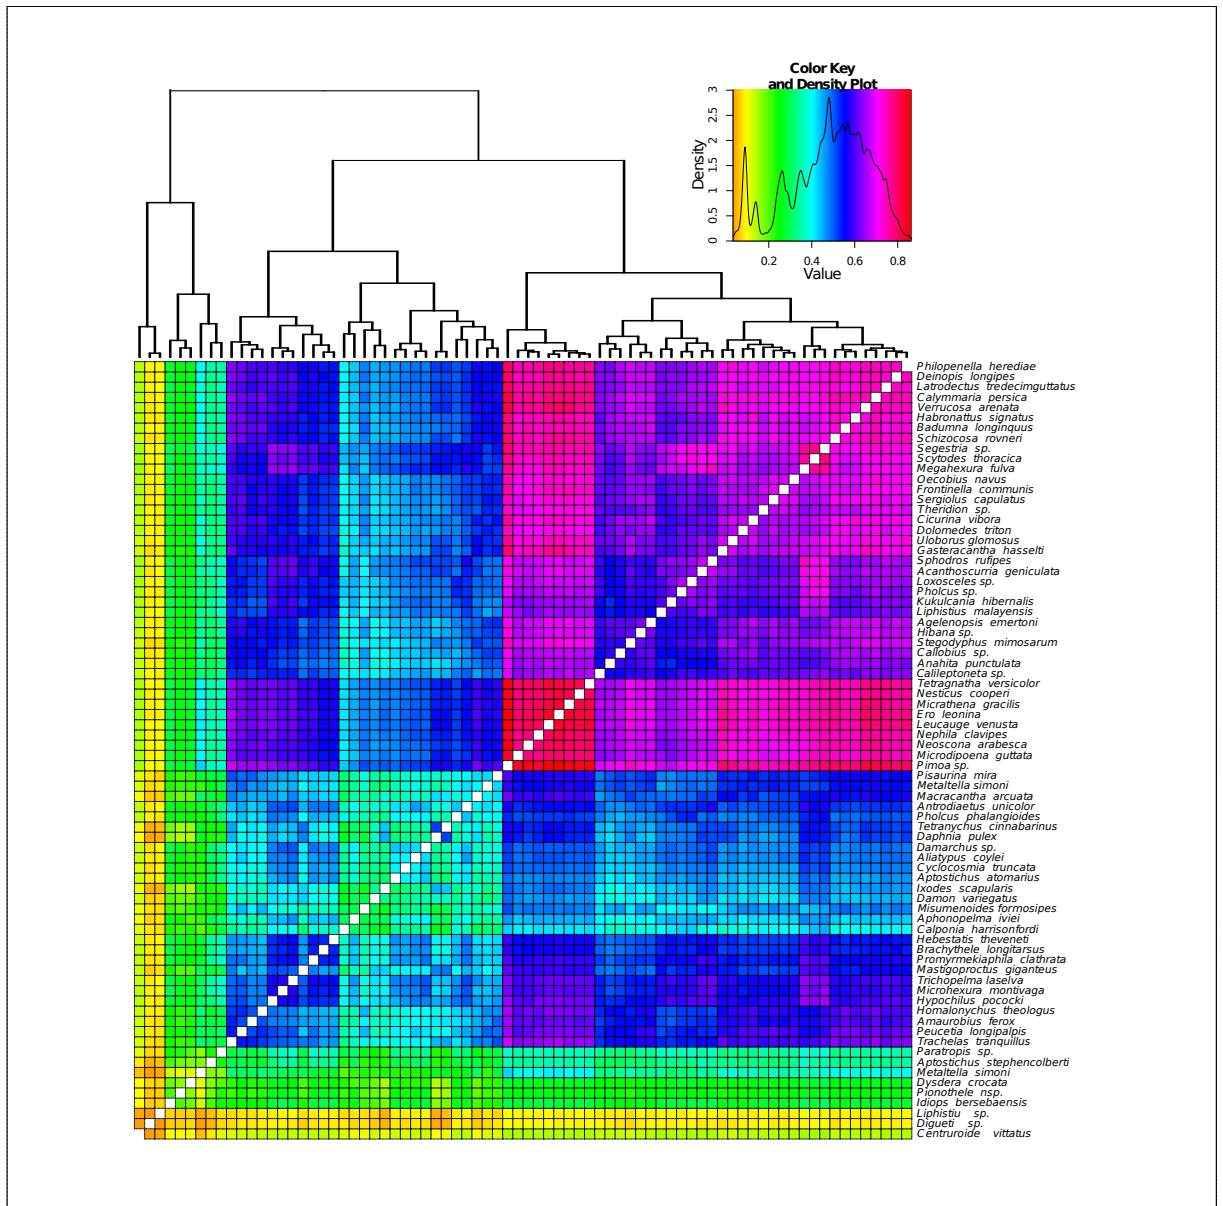

**Figure 4.** Clustering/heatmap analysis depicting degree of shared data between each species pair; arthropod core ortholog matrix (matrix 5, Table 2). Degree of positive data overlap indicated by a color-coded heatmap (yellow = low, red = high); species order from right to left in the same order as listed from top to bottom on right side of figure. Lack of phylogenetic clustering indicates bias from shared data does not explain relationships seen in phylogenomic analyses.

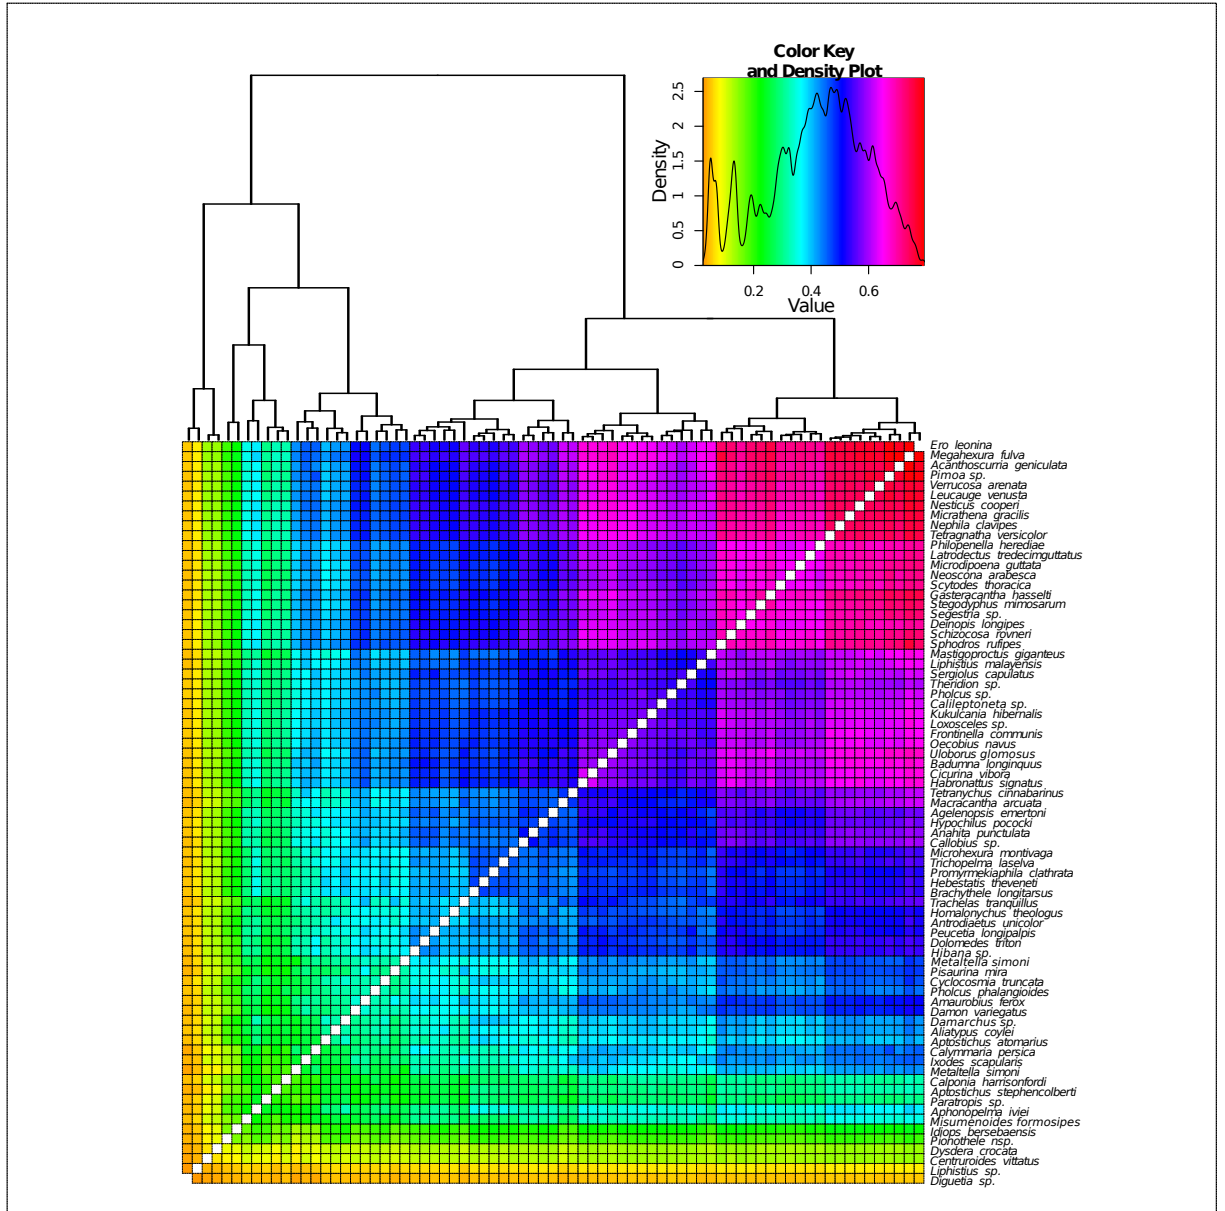

**Figure 5.** Clustering/heatmap analysis depicting degree of shared data between each species pair; full spider ortholog matrix (matrix 1, Table 2). Degree of positive data overlap indicated by a color-coded heatmap (yellow = low, red = high); species order from right to left in the same order as listed from top to bottom on right side of figure. Lack of phylogenetic clustering indicates bias from shared data does not explain relationships seen in phylogenomic analyses.

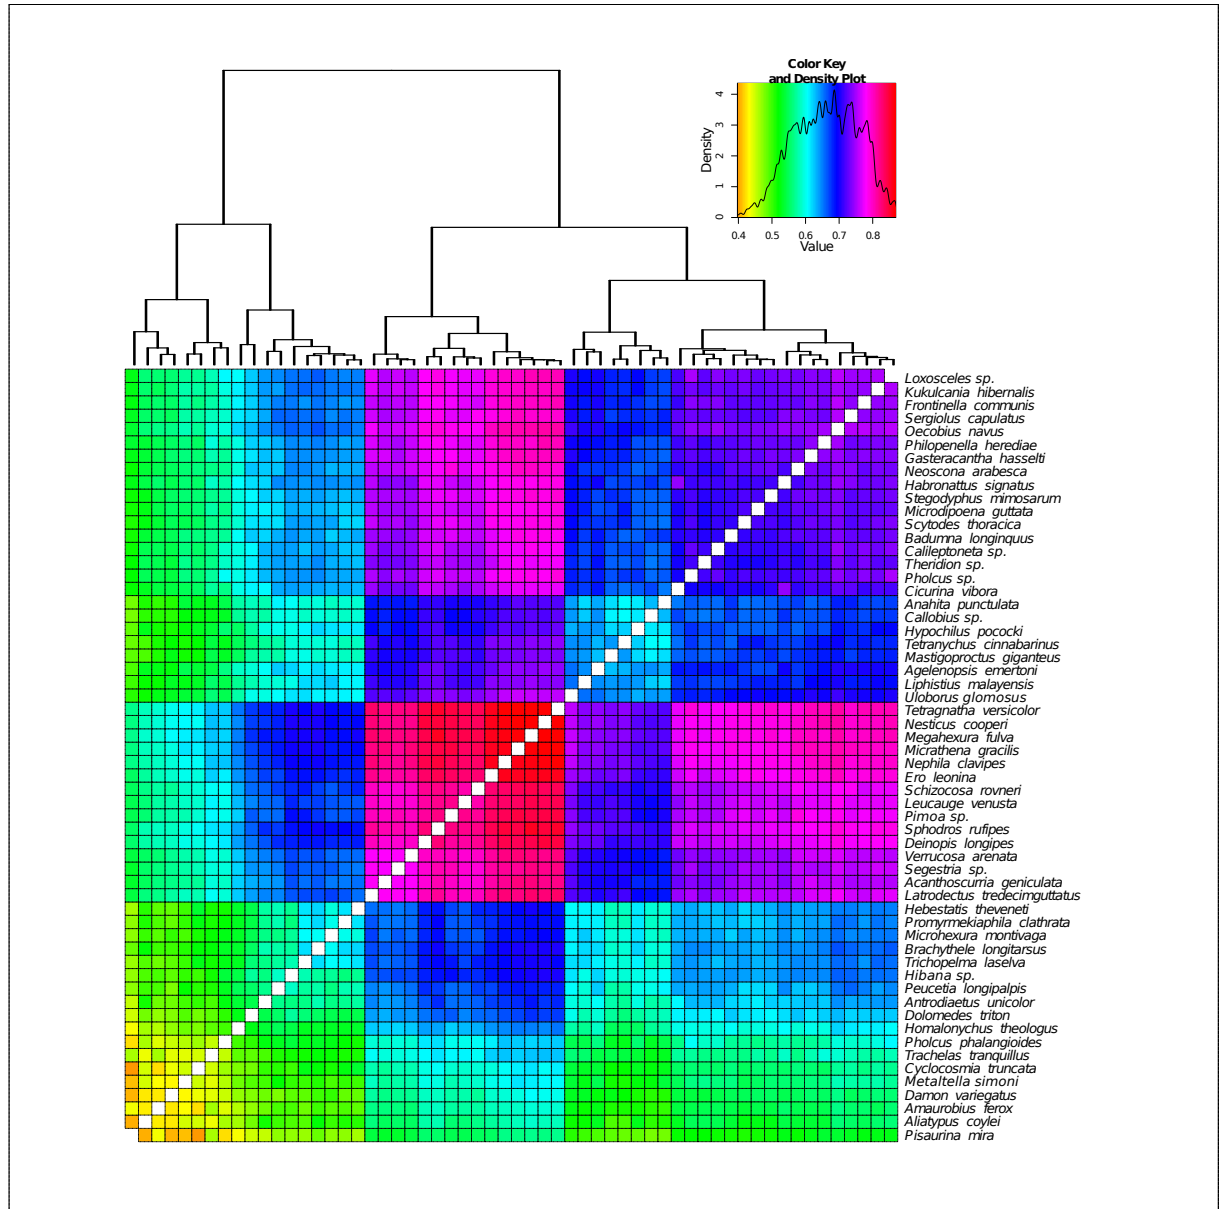

**Figure 6.** Clustering/heatmap analysis depicting degree of shared data between each species pair; MARE matrix (matrix 7, Table 2). Degree of positive data overlap indicated by a color-coded heatmap (yellow = low, red = high); species order from right to left in the same order as listed from top to bottom on right side of figure. Lack of phylogenetic clustering indicates bias from shared data does not explain relationships seen in phylogenomic analyses.

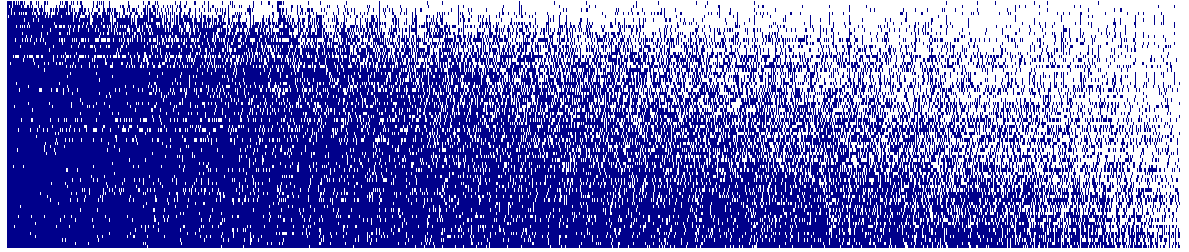

**Figure 7.** Gene occupancy of matrix 1 (see Table 2). Colored squares represent partitions present in matrix for each OTU (x-axis, in descending order of OTU representation from left to right) and each partition or gene (y-axis, in ascending order of partition representation).

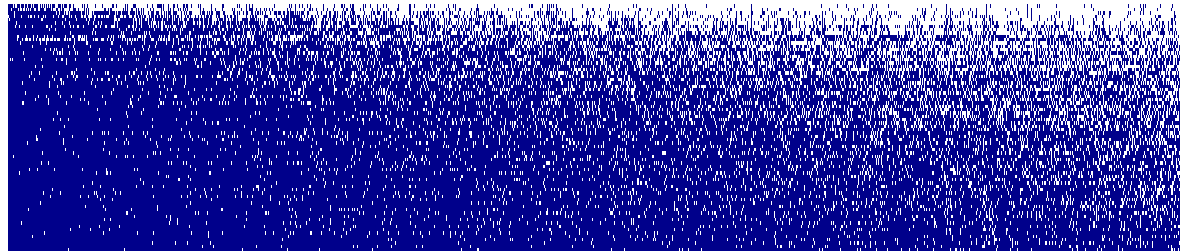

**Figure 8.** Gene occupancy of matrix 2 (see Table 2). Colored squares represent partitions present in matrix for each OTU (x-axis, in descending order of OTU representation from left to right) and each partition or gene (y-axis, in ascending order of partition representation).

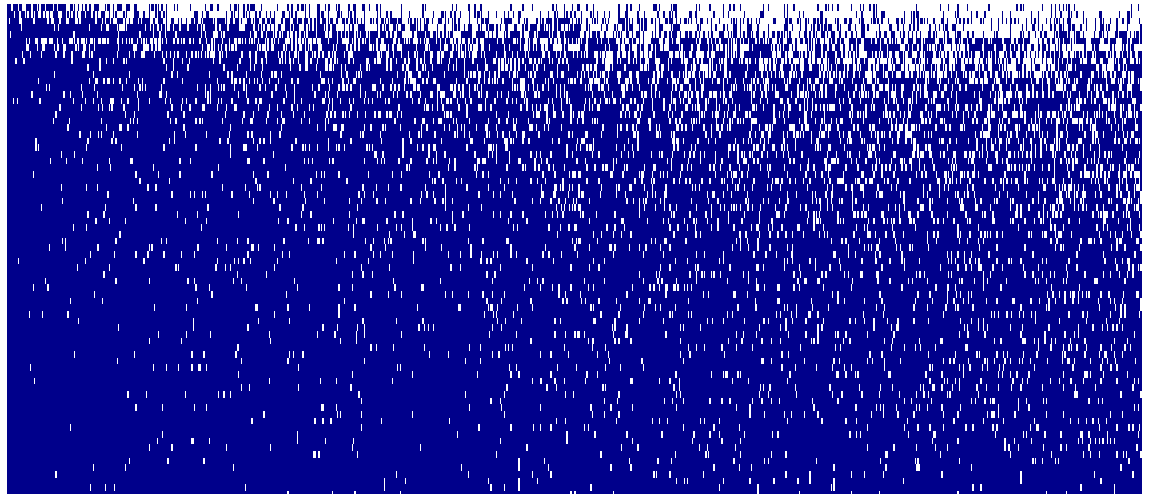

**Figure 9.** Gene occupancy of matrix 3 (see Table 2). Colored squares represent partitions present in matrix for each OTU (y-axis, in descending order of OTU representation from bottom to top) and each partition or gene (x-axis, in descending order of partition representation from left to right).

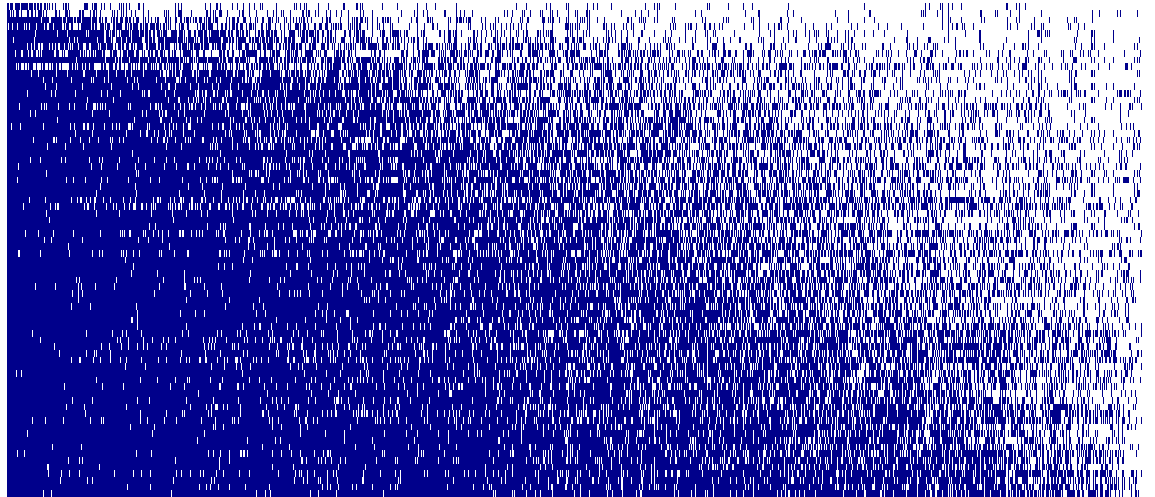

**Figure 10.** Gene occupancy of matrix 4 (see Table 2). Colored squares represent partitions present in matrix for each OTU (y-axis, in descending order of OTU representation from bottom to top) and each partition or gene (x-axis, in descending order of partition representation from left to right).

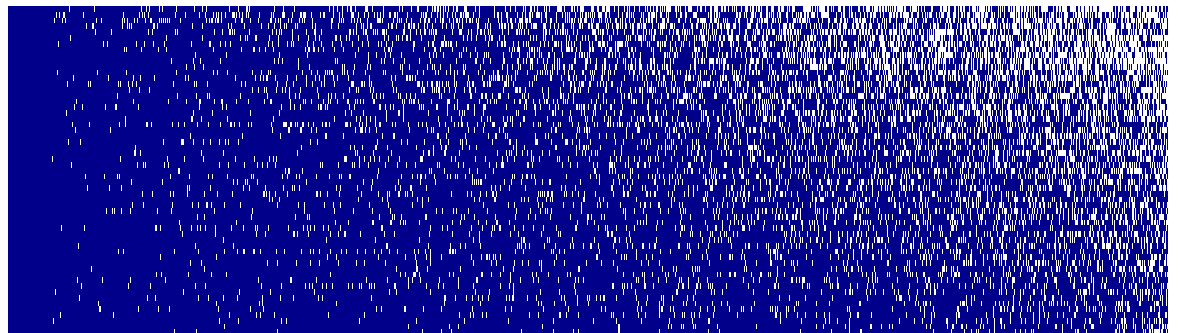

**Figure 11.** Gene occupancy of matrix 7 (see Table 2). Colored squares represent partitions present in matrix for each OTU (y-axis, in descending order of OTU representation from bottom to top) and each partition or gene (x-axis, in descending order of partition representation from left to right).

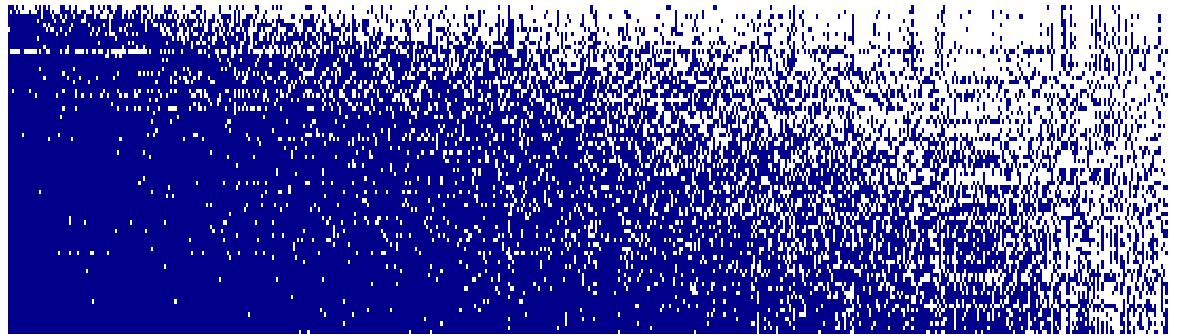

**Figure 12.** Gene occupancy of matrix 5 (see Table 2). Colored squares represent partitions present in matrix for each OTU (y-axis, in descending order of OTU representation from bottom to top) and each partition or gene (x-axis, in descending order of partition representation from left to right).

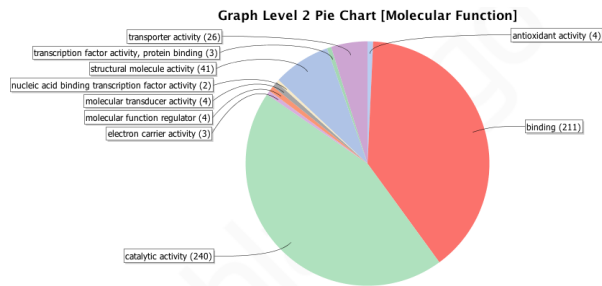

**Figure 13.** Gene Ontology molecular functions, levels 2 for OGs shared by Arthropod and Spider Core sets. Figures generated by Blast2GO analysis.

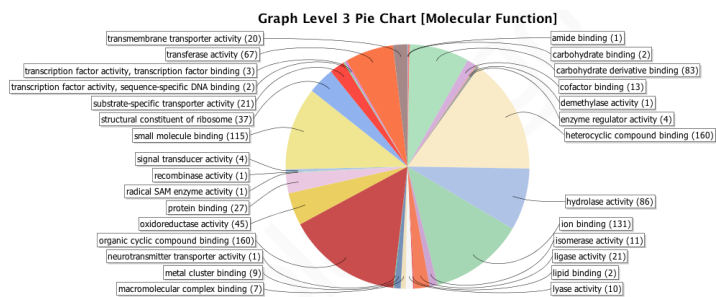

**Figure 14.** Gene Ontology molecular functions, level 3 for OGs shared by Arthropod and Spider Core sets. Figures generated by Blast2GO analysis.
