# Supplementary material for: Spider phylogenomics: untangling the Spider Tree of Life
Source: PubMed Central journal article supplement (PMC4768681; doi:10.7717/peerj.1719), 2016-02-23
Supplement: peerj-04-1719-s019.pdf [file peerj-04-1719-s019.pdf]

**Table 3.** Spider Core Ortholog Annotations. BLASTP (top hit, evaluate 1E-10) of Spider Core OGs found in reference taxon (*Acanthoscurria geniculata*) against either 1) custom BLAST database of *Stegodyphus mimosarum* proteins downloaded from GenBank (BioProject Accession PRJNA222714; 27,135 protein sequences) or 2) nr, the non-redundant protein database maintained by NCBI. Arthropod Core OG matches to Spider Core OG listed in first column.

| Arthropod Core ID | Spider Core ID | Putative Ortholog Description                             | Target Database |
|-------------------|----------------|-----------------------------------------------------------|-----------------|
| NA                | 356            | Protein spinster partial                                  | custom          |
| NA                | 358            | MAP/microtubule affinity-regulating kinase 3 partial      | custom          |
| NA                | 359            | Metastasis-associated protein MTA1 partial                | custom          |
| NA                | 360            | Oxysterol-binding protein-related protein 9 partial       | custom          |
| NA                | 363            | NAD-dependent deacetylase sirtuin-1 partial               | custom          |
| NA                | 365            | putative fatty acyl-CoA reductase partial                 | custom          |
| 90433             | 369            | Superkiller viralicidic activity 2-like 2 partial         | custom          |
| NA                | 370            | hypothetical protein X975 26308 partial                   | custom          |
| NA                | 371            | 5'-3' exoribonuclease 2 partial                           | custom          |
| 90338             | 372            | Calcium homeostasis endoplasmic reticulum protein partial | custom          |
| NA                | 375            | Lysine-specific demethylase 5A partial                    | custom          |
| NA                | 382            | MAGUK p55 subfamily member 5 partial                      | custom          |
| NA                | 383            | Catenin alpha partial                                     | custom          |
| NA                | 388            | Protein alan shepard partial                              | custom          |
| NA                | 389            | Caskin-1 partial                                          | custom          |
| NA                | 392            | Glycerophosphocholine phosphodiesterase GPCPD1 partial    | custom          |
| NA                | 393            | Ataxin-2 partial                                          | custom          |

**Supplemental Table 3 – continued from previous page**

| <b>Arthropod Core ID</b> | <b>Spider Core ID</b> | <b>Putative Ortholog Description</b>                                                     | <b>Target Database</b> |
|--------------------------|-----------------------|------------------------------------------------------------------------------------------|------------------------|
| NA                       | 395                   | Transcription elongation factor SPT6 partial                                             | custom                 |
| NA                       | 399                   | E3 ubiquitin-protein ligase UBR2 partial                                                 | custom                 |
| NA                       | 410                   | Phosphatidylinositol-binding clathrin assembly protein LAP partial                       | custom                 |
| NA                       | 411                   | Sushi von Willebrand factor type A EGF and pentraxin domain-containing protein 1 partial | custom                 |
| NA                       | 413                   | Cubilin partial                                                                          | custom                 |
| NA                       | 415                   | Ras GTPase-activating protein 1 partial                                                  | custom                 |
| NA                       | 416                   | Cytoplasmic dynein 1 intermediate chain 2 partial                                        | custom                 |
| 89661                    | 418                   | Bifunctional 3'-phosphoadenosine 5'-phosphosulfate synthase partial                      | custom                 |
| NA                       | 419                   | Glycogen synthase kinase-3 beta partial                                                  | custom                 |
| NA                       | 422                   | Irregular chiasm C-roughest protein partial                                              | custom                 |
| 89807                    | 423                   | Actin-interacting protein 1 partial                                                      | custom                 |
| NA                       | 425                   | hypothetical protein X975 25889 partial                                                  | custom                 |
| NA                       | 426                   | Transforming growth factor-beta-induced protein ig-h3 partial                            | custom                 |
| NA                       | 427                   | Coatomer subunit alpha partial                                                           | custom                 |
| NA                       | 429                   | putative E3 ubiquitin-protein ligase MY-CBP2 partial                                     | custom                 |
| NA                       | 430                   | Macoilin-1 partial                                                                       | custom                 |
| 90507                    | 431                   | Stress-activated protein kinase JNK partial                                              | custom                 |
| NA                       | 432                   | 5'-3' exoribonuclease 1 partial                                                          | custom                 |

Supplemental Table 3 – continued from previous page

| Arthropod Core ID | Spider Core ID | Putative Ortholog Description                                | Target Database |
|-------------------|----------------|--------------------------------------------------------------|-----------------|
| NA                | 437            | U5 small nuclear ribonucleoprotein helicase partial          | custom          |
| 90171             | 438            | U5 small nuclear ribonucleoprotein component partial         | custom          |
| 90478             | 439            | Nucleobindin-1 partial                                       | custom          |
| NA                | 440            | Protein transport protein Sec24A partial                     | custom          |
| NA                | 441            | hypothetical protein X975 00738 partial                      | custom          |
| NA                | 443            | Receptor-type tyrosine-protein phosphatase mu partial        | custom          |
| 90468             | 444            | Beta-galactosidase partial                                   | custom          |
| NA                | 446            | hypothetical protein X975 09242 partial                      | custom          |
| NA                | 449            | Tyrosine-protein kinase PR2 partial                          | custom          |
| NA                | 454            | Muscle M-line assembly protein unc-89 partial                | custom          |
| 90448             | 455            | Endoplasmic reticulum chaperone partial                      | custom          |
| 89844             | 456            | Ubiquitin-like modifier-activating enzyme 1 partial          | custom          |
| 90063             | 457            | hypothetical protein X975 10054 partial                      | custom          |
| 90057             | 460            | Glycogen debranching enzyme partial                          | custom          |
| NA                | 462            | Protein LSM14-like protein partial                           | custom          |
| 89946             | 464            | Integrin alpha-9 partial                                     | custom          |
| NA                | 465            | Lysine-specific demethylase 2B partial                       | custom          |
| 90251             | 466            | Ubiquitin-like modifier-activating enzyme ATG7 partial       | custom          |
| NA                | 470            | Glycerol-3-phosphate acyltransferase 1 mitochondrial partial | custom          |

**Supplemental Table 3 – continued from previous page**

| <b>Arthropod Core ID</b> | <b>Spider Core ID</b> | <b>Putative Ortholog Description</b>                                      | <b>Target Database</b> |
|--------------------------|-----------------------|---------------------------------------------------------------------------|------------------------|
| NA                       | 473                   | Serine/threonine-protein phosphatase 6 regulatory subunit 3 partial       | custom                 |
| NA                       | 474                   | KAT8 regulatory NSL complex subunit 1 partial                             | custom                 |
| 89714                    | 475                   | UDP-glucose:glycoprotein glucosyltransferase 1 partial                    | custom                 |
| 90034                    | 476                   | Sterol regulatory element-binding protein 1 partial                       | custom                 |
| NA                       | 477                   | Glypican-6 partial                                                        | custom                 |
| 90536                    | 478                   | Pyruvate kinase muscle isozyme partial                                    | custom                 |
| NA                       | 480                   | Influenza virus NS1A-binding protein-like protein partial                 | custom                 |
| 90317                    | 481                   | Armadillo segment polarity protein partial                                | custom                 |
| NA                       | 482                   | ATP-dependent RNA helicase DDX1 partial                                   | custom                 |
| 90596                    | 484                   | Leucine-tRNA ligase cytoplasmic partial                                   | custom                 |
| 89750                    | 485                   | Eukaryotic peptide chain release factor GTP-binding subunit ERF3A partial | custom                 |
| 90499                    | 486                   | Serrate RNA effector molecule-like protein partial                        | custom                 |
| 89876                    | 491                   | Exportin-1 partial                                                        | custom                 |
| NA                       | 504                   | Oxysterol-binding protein 2 partial                                       | custom                 |
| NA                       | 505                   | Serine/threonine-protein kinase tousled-like 1 partial                    | custom                 |
| 89918                    | 509                   | Splicing factor 3A subunit 1 partial                                      | custom                 |
| NA                       | 510                   | Band 4.1-like protein 4A partial                                          | custom                 |
| 90393                    | 512                   | FACT complex subunit spt16 partial                                        | custom                 |

Supplemental Table 3 – continued from previous page

| Arthropod Core ID | Spider Core ID | Putative Ortholog Description                            | Target Database |
|-------------------|----------------|----------------------------------------------------------|-----------------|
| NA                | 513            | ATP-citrate synthase partial                             | custom          |
| NA                | 514            | Choline/ethanolaminephosphotransferase 1 partial         | custom          |
| 89829             | 518            | Ubiquitin carboxyl-terminal hydrolase 7 partial          | custom          |
| NA                | 519            | Carnitine O-palmitoyltransferase 1 liver isoform partial | custom          |
| 90354             | 520            | Pre-mRNA-processing factor 40-like protein partial       | custom          |
| NA                | 522            | CAP-Gly domain-containing linker protein 1 partial       | custom          |
| NA                | 524            | Carboxypeptidase D partial                               | custom          |
| NA                | 525            | hypothetical protein X975 17021 partial                  | custom          |
| NA                | 529            | Eukaryotic initiation factor 4A-III partial              | custom          |
| 89912             | 534            | AP-2 complex sub-unit alpha-2 partial                    | custom          |
| NA                | 535            | hypothetical protein X975 00501 partial                  | custom          |
| NA                | 537            | hypothetical protein X975 01393 partial                  | custom          |
| NA                | 539            | Phytanoyl-CoA dioxygenase peroxisomal partial            | custom          |
| NA                | 540            | Cullin-1 partial                                         | custom          |
| NA                | 541            | Lethal(3)malignant brain tumor-like protein 3 partial    | custom          |
| 89995             | 542            | putative ATP-dependent RNA helicase DDX23 partial        | custom          |
| NA                | 544            | Ataxin-2 partial                                         | custom          |
| NA                | 545            | hypothetical protein X975 18913 partial                  | custom          |
| NA                | 549            | Kynurenine-oxoglutarate transaminase 3 partial           | custom          |
| NA                | 550            | Poly(U)-binding-splicing factor half pint partial        | custom          |

**Supplemental Table 3 – continued from previous page**

| <b>Arthropod Core ID</b> | <b>Spider Core ID</b> | <b>Putative Ortholog Description</b>                     | <b>Target Database</b> |
|--------------------------|-----------------------|----------------------------------------------------------|------------------------|
| 89734                    | 551                   | putative phospholipid-transporting ATPase IIB partial    | custom                 |
| NA                       | 553                   | hypothetical protein X975 21588 partial                  | custom                 |
| NA                       | 554                   | Zinc finger X-linked protein ZXDB partial                | custom                 |
| NA                       | 560                   | Bone morphogenetic protein receptor type-2 partial       | custom                 |
| 90335                    | 561                   | Threonine-tRNA ligase cytoplasmic partial                | custom                 |
| 90055                    | 562                   | Valine-tRNA ligase partial                               | custom                 |
| NA                       | 563                   | AP-3 complex subunit delta-1 partial                     | custom                 |
| 90418                    | 565                   | cAMP-dependent protein kinase regulatory subunit partial | custom                 |
| NA                       | 567                   | Inactive dipeptidyl peptidase 10 partial                 | custom                 |
| NA                       | 568                   | Uridine-cytidine kinase-like 1 partial                   | custom                 |
| NA                       | 569                   | hypothetical protein X975 14140 partial                  | custom                 |
| NA                       | 570                   | Protein transport protein Sec23A partial                 | custom                 |
| NA                       | 572                   | Integrator complex subunit 4 partial                     | custom                 |
| NA                       | 574                   | putative ATP-dependent RNA helicase TDRD9 partial        | custom                 |
| NA                       | 576                   | Ubiquitin carboxyl-terminal hydrolase 47 partial         | custom                 |
| NA                       | 577                   | hypothetical protein X975 19997 partial                  | custom                 |
| NA                       | 582                   | Vitellogenin-6 partial                                   | custom                 |
| NA                       | 584                   | Protein phosphatase 1B partial                           | custom                 |
| NA                       | 585                   | Protein FAM134C partial                                  | custom                 |
| NA                       | 586                   | YTH domain family protein 1 partial                      | custom                 |

**Supplemental Table 3 – continued from previous page**

| <b>Arthropod Core ID</b> | <b>Spider Core ID</b> | <b>Putative Ortholog Description</b>                        | <b>Target Database</b> |
|--------------------------|-----------------------|-------------------------------------------------------------|------------------------|
| NA                       | 587                   | Ral GTPase-activating protein subunit beta partial          | custom                 |
| NA                       | 588                   | Vacuolar protein sorting-associated protein 35 partial      | custom                 |
| NA                       | 590                   | Ubiquitin thioesterase Zranb1 partial                       | custom                 |
| NA                       | 592                   | hypothetical protein X975 10048 partial                     | custom                 |
| NA                       | 595                   | Angiotensin-converting enzyme partial                       | custom                 |
| 89663                    | 597                   | Procollagen-lysine2-oxoglutarate 5-dioxygenase 3 partial    | custom                 |
| NA                       | 598                   | Tropomodulin partial                                        | custom                 |
| NA                       | 600                   | Ectonucleoside triphosphate diphosphohydrolase 1 partial    | custom                 |
| 89883                    | 601                   | Monocarboxylate transporter 14 partial                      | custom                 |
| 90447                    | 602                   | Aconitate hydratase mitochondrial partial                   | custom                 |
| NA                       | 603                   | hypothetical protein X975 15148 partial                     | custom                 |
| NA                       | 604                   | Acetyl-coenzyme A synthetase cytoplasmic partial            | custom                 |
| NA                       | 605                   | ATP-sensitive inward rectifier potassium channel 12 partial | custom                 |
| NA                       | 609                   | Homeobox protein cut partial                                | custom                 |
| NA                       | 610                   | Pumilio-like protein partial                                | custom                 |
| NA                       | 613                   | Protein Hook-like protein partial                           | custom                 |
| NA                       | 615                   | Trithorax group protein osa partial                         | custom                 |
| 90516                    | 619                   | Glutamine synthetase 2 cytoplasmic partial                  | custom                 |
| 90333                    | 620                   | Non-specific lipid-transfer protein partial                 | custom                 |

**Supplemental Table 3 – continued from previous page**

| <b>Arthropod Core ID</b> | <b>Spider Core ID</b> | <b>Putative Ortholog Description</b>                                        | <b>Target Database</b> |
|--------------------------|-----------------------|-----------------------------------------------------------------------------|------------------------|
| NA                       | 621                   | E3 ubiquitin-protein ligase HUWE1 partial                                   | custom                 |
| NA                       | 622                   | Stathmin-1-A partial                                                        | custom                 |
| NA                       | 623                   | Neuropathy target esterase partial                                          | custom                 |
| 90470                    | 624                   | Serine/threonine-protein kinase TAO1 partial                                | custom                 |
| 89658                    | 625                   | Nuclease domain-containing protein 1 partial                                | custom                 |
| NA                       | 627                   | Cytoplasmic polyadenylation element-binding protein 1-B partial             | custom                 |
| NA                       | 631                   | Vacuolar protein sorting-associated protein 41-like protein partial         | custom                 |
| NA                       | 632                   | E3 ubiquitin-protein ligase RNF123 partial                                  | custom                 |
| NA                       | 633                   | Pyruvate dehydrogenase phosphatase regulatory subunit mitochondrial partial | custom                 |
| NA                       | 635                   | hypothetical protein X975 12682 partial                                     | custom                 |
| NA                       | 636                   | Ring canal kelch-like protein partial                                       | custom                 |
| NA                       | 641                   | hypothetical protein X975 17022 partial                                     | custom                 |
| 90318                    | 644                   | Chloride channel protein 2 partial                                          | custom                 |
| NA                       | 650                   | Homogentisate 12-dioxygenase partial                                        | custom                 |
| 90595                    | 652                   | hypothetical protein X975 02019 partial                                     | custom                 |
| NA                       | 653                   | Proteasome activator complex subunit 4 partial                              | custom                 |
| NA                       | 655                   | Secretory carrier-associated membrane protein 1 partial                     | custom                 |



Supplemental Table 3 – continued from previous page

| Arthropod Core ID | Spider Core ID | Putative Ortholog Description                                        | Target Database |
|-------------------|----------------|----------------------------------------------------------------------|-----------------|
| 90300             | 656            | Nuclear export mediator factor Nemf partial                          | custom          |
| 89830             | 660            | Carboxypeptidase M partial                                           | custom          |
| NA                | 661            | Cytosolic purine 5'-nucleotidase partial                             | custom          |
| NA                | 664            | GMP synthase [glutamine-hydrolyzing] partial                         | custom          |
| NA                | 665            | Neuropilin and tolloid-like protein 2 partial                        | custom          |
| 90247             | 666            | Myosin heavy chain 95F partial                                       | custom          |
| NA                | 668            | Upstream stimulatory factor 2 partial                                | custom          |
| NA                | 669            | TBC1 domain family member 9 partial                                  | custom          |
| NA                | 677            | PHD and RING finger domain-containing protein 1 partial              | custom          |
| NA                | 680            | Apoptosis-stimulating of p53 protein 1 partial                       | custom          |
| NA                | 681            | putative hexokinase HKDC1 partial                                    | custom          |
| NA                | 684            | Ribosome-binding protein 1 partial                                   | custom          |
| 90510             | 686            | Arginine kinase partial                                              | custom          |
| NA                | 688            | Hepatocyte growth factor-regulated tyrosine kinase substrate partial | custom          |
| NA                | 689            | Striatin-3 partial                                                   | custom          |
| NA                | 691            | Cullin-3-A partial                                                   | custom          |
| NA                | 692            | Laminin subunit alpha-2 partial                                      | custom          |
| NA                | 693            | hypothetical protein X975 05141 partial                              | custom          |
| 90142             | 697            | Protein unc-45-like protein partial                                  | custom          |
| 90353             | 699            | Protein henna partial                                                | custom          |
| NA                | 700            | hypothetical protein X975 22176 partial                              | custom          |

**Supplemental Table 3 – continued from previous page**

| <b>Arthropod Core ID</b> | <b>Spider Core ID</b> | <b>Putative Ortholog Description</b>                                   | <b>Target Database</b> |
|--------------------------|-----------------------|------------------------------------------------------------------------|------------------------|
| NA                       | 703                   | Alpha-taxilin partial                                                  | custom                 |
| NA                       | 705                   | Phosphatidylinositol 4-kinase beta partial                             | custom                 |
| NA                       | 707                   | Zinc finger FYVE domain-containing protein 1 partial                   | custom                 |
| NA                       | 708                   | Cyclic AMP-responsive element-binding protein 3-like protein 3 partial | custom                 |
| NA                       | 711                   | E3 ubiquitin-protein ligase LRSAM1 partial                             | custom                 |
| 89656                    | 717                   | Nipped-B-like protein partial                                          | custom                 |
| NA                       | 719                   | Protein flightless-1 partial                                           | custom                 |
| NA                       | 724                   | hypothetical protein X975 08766 partial                                | custom                 |
| NA                       | 725                   | Choline-phosphate cytidyltransferase B partial                         | custom                 |
| 89902                    | 726                   | putative ATP-dependent RNA helicase DDX4 partial                       | custom                 |
| NA                       | 727                   | Isocitrate dehydrogenase [NADP] mitochondrial partial                  | custom                 |
| 90358                    | 728                   | Cyclin-dependent kinase 2 partial                                      | custom                 |
| NA                       | 729                   | C-1-tetrahydrofolate synthase cytoplasmic partial                      | custom                 |
| NA                       | 730                   | PDZ and LIM domain protein Zasp partial                                | custom                 |
| NA                       | 731                   | cAMP-specific 3'5'-cyclic phosphodiesterase partial                    | custom                 |
| NA                       | 732                   | Syntaxin-binding protein 5 partial                                     | custom                 |
| NA                       | 733                   | Histone-lysine N-methyltransferase EZH2 partial                        | custom                 |
| NA                       | 734                   | 26S proteasome non-ATPase regulatory subunit 1 partial                 | custom                 |

**Supplemental Table 3 – continued from previous page**

| <b>Arthropod Core ID</b> | <b>Spider Core ID</b> | <b>Putative Ortholog Description</b>                               | <b>Target Database</b> |
|--------------------------|-----------------------|--------------------------------------------------------------------|------------------------|
| NA                       | 735                   | Importin-9 partial                                                 | custom                 |
| NA                       | 737                   | hypothetical protein X975 03177 partial                            | custom                 |
| NA                       | 738                   | Regulator of chromosome condensation partial                       | custom                 |
| NA                       | 739                   | putative palmitoyl-transferase ZDHHC8 partial                      | custom                 |
| NA                       | 740                   | Unconventional myosin-XV partial                                   | custom                 |
| NA                       | 746                   | Mannosyl-oligosaccharide alpha-12-mannosidase isoform A partial    | custom                 |
| 89937                    | 748                   | [Pyruvate dehydrogenase [lipoamide]] kinase mitochondrial partial  | custom                 |
| NA                       | 750                   | Exocyst complex component 6B partial                               | custom                 |
| NA                       | 751                   | Katanin p80 WD40-containing subunit B1 partial                     | custom                 |
| NA                       | 752                   | Transmembrane and coiled-coil domain-containing protein 7 partial  | custom                 |
| NA                       | 757                   | Protein MON2-like protein partial                                  | custom                 |
| NA                       | 758                   | Zinc finger FYVE domain-containing protein 9 partial               | custom                 |
| NA                       | 761                   | hypothetical protein X975 06477 partial                            | custom                 |
| NA                       | 763                   | Protein diaphanous-like protein partial                            | custom                 |
| NA                       | 767                   | Calcium uptake protein 1-like protein mitochondrial partial        | custom                 |
| NA                       | 770                   | Solute carrier organic anion transporter family member 4A1 partial | custom                 |
| NA                       | 771                   | Restin-like protein partial                                        | custom                 |

Supplemental Table 3 – continued from previous page

| Arthropod Core ID | Spider Core ID | Putative Ortholog Description                                   | Target Database |
|-------------------|----------------|-----------------------------------------------------------------|-----------------|
| NA                | 772            | PDZ and LIM domain protein Zasp partial                         | custom          |
| NA                | 773            | Homer protein-like protein partial                              | custom          |
| NA                | 775            | Allene oxide synthase-lipoxygenase protein partial              | custom          |
| NA                | 777            | Tumor susceptibility 101 protein partial                        | custom          |
| NA                | 779            | Solute carrier family 12 member 4 partial                       | custom          |
| NA                | 782            | putative gamma-glutamyltransferase ywrD partial                 | custom          |
| NA                | 783            | Heat shock protein 12A partial                                  | custom          |
| NA                | 784            | Coagulation factor X partial                                    | custom          |
| NA                | 785            | Endothelin-converting enzyme 2 partial                          | custom          |
| NA                | 788            | Lysyl oxidase-like protein partial                              | custom          |
| NA                | 789            | Cysteine and glycine-rich protein 2 partial                     | custom          |
| NA                | 792            | Chondroitin sulfate N-acetylgalactosaminyltransferase 1 partial | custom          |
| NA                | 793            | Stearoyl-CoA desaturase 5 partial                               | custom          |
| 89752             | 794            | hypothetical protein X975 01626 partial                         | custom          |
| NA                | 797            | StAR-related lipid transfer protein 13 partial                  | custom          |
| NA                | 800            | Collagen type IV alpha-3-binding protein partial                | custom          |
| NA                | 801            | Nuclear receptor-binding protein-like protein partial           | custom          |
| 90155             | 803            | Cullin-4B partial                                               | custom          |
| NA                | 804            | Interference hedgehog partial                                   | custom          |

**Supplemental Table 3 – continued from previous page**

| <b>Arthropod Core ID</b> | <b>Spider Core ID</b> | <b>Putative Ortholog Description</b>                    | <b>Target Database</b> |
|--------------------------|-----------------------|---------------------------------------------------------|------------------------|
| NA                       | 805                   | hypothetical protein X975 01883 partial                 | custom                 |
| NA                       | 808                   | Nostrin partial                                         | custom                 |
| NA                       | 809                   | Ubiquitin carboxyl-terminal hydrolase 32 partial        | custom                 |
| NA                       | 812                   | F-box-like/WD repeat-containing protein TBL1XR1 partial | custom                 |
| NA                       | 814                   | Golgi reassembly-stacking protein 2 partial             | custom                 |
| NA                       | 815                   | SEC23-interacting protein partial                       | custom                 |
| 89733                    | 817                   | Coatomer subunit beta partial                           | custom                 |
| NA                       | 818                   | Peroxisomal targeting signal 1 receptor partial         | custom                 |
| NA                       | 819                   | Syntaxin-7 partial                                      | custom                 |
| NA                       | 821                   | Clathrin interactor 1 partial                           | custom                 |
| 89869                    | 823                   | WASH complex subunit strumpellin partial                | custom                 |
| NA                       | 824                   | Protein cereblon partial                                | custom                 |
| NA                       | 825                   | hypothetical protein X975 06244 partial                 | custom                 |
| NA                       | 827                   | Ribosome biogenesis protein BMS1-like protein partial   | custom                 |
| NA                       | 829                   | Aldehyde dehydrogenase family 3 member B1 partial       | custom                 |
| NA                       | 830                   | Lipase maturation factor 2 partial                      | custom                 |
| NA                       | 832                   | Neural cell adhesion molecule 1-A partial               | custom                 |
| NA                       | 833                   | hypothetical protein X975 18325 partial                 | custom                 |
| NA                       | 835                   | hypothetical protein X975 17516 partial                 | custom                 |
| 90215                    | 840                   | DNA damage-binding protein 1 partial                    | custom                 |

**Supplemental Table 3 – continued from previous page**

| <b>Arthropod Core ID</b> | <b>Spider Core ID</b> | <b>Putative Ortholog Description</b>                    | <b>Target Database</b> |
|--------------------------|-----------------------|---------------------------------------------------------|------------------------|
| NA                       | 841                   | BAl1-associated protein 3 partial                       | custom                 |
| 90126                    | 842                   | ATP-dependent RNA helicase abstract partial             | custom                 |
| NA                       | 845                   | putative adenosylhomocysteinase 3 partial               | custom                 |
| NA                       | 847                   | Transcription factor CP2 partial                        | custom                 |
| NA                       | 851                   | Heterogeneous nuclear ribonucleoprotein K partial       | custom                 |
| NA                       | 853                   | U5 small nuclear ribonucleoprotein helicase partial     | custom                 |
| NA                       | 856                   | Dipeptidyl peptidase 1 partial                          | custom                 |
| 89646                    | 857                   | UTP–glucose-1-phosphate uridylyltransferase partial     | custom                 |
| NA                       | 859                   | U4/U6 small nuclear ribonucleoprotein Prp3 partial      | custom                 |
| 89888                    | 861                   | Protein arginine N-methyltransferase 1 partial          | custom                 |
| NA                       | 862                   | Myotubularin-related protein 3 partial                  | custom                 |
| 90431                    | 863                   | Poly(A) polymerase gamma partial                        | custom                 |
| NA                       | 864                   | Programmed cell death 6-interacting protein partial     | custom                 |
| NA                       | 868                   | F-box/WD repeat-containing protein 7 partial            | custom                 |
| NA                       | 874                   | Short spindle protein 4 partial                         | custom                 |
| NA                       | 875                   | Alkaline phosphatase tissue-nonspecific isozyme partial | custom                 |
| NA                       | 876                   | Extracellular domains-containing protein partial        | custom                 |
| NA                       | 877                   | Crooked neck-like protein 1 partial                     | custom                 |

Supplemental Table 3 – continued from previous page

| Arthropod Core ID | Spider Core ID | Putative Ortholog Description                              | Target Database |
|-------------------|----------------|------------------------------------------------------------|-----------------|
| 90122             | 879            | putative glycogen [starch] synthase partial                | custom          |
| NA                | 880            | WD repeat and FYVE domain-containing protein 2 partial     | custom          |
| NA                | 881            | Nuclear hormone receptor E75 partial                       | custom          |
| NA                | 884            | Eukaryotic translation initiation factor 2A partial        | custom          |
| NA                | 886            | AT-rich interactive domain-containing protein 5B partial   | custom          |
| NA                | 887            | DNA polymerase sigma partial                               | custom          |
| NA                | 888            | FGGY carbohydrate kinase domain-containing protein partial | custom          |
| NA                | 890            | Trafficking protein particle complex subunit 12 partial    | custom          |
| NA                | 892            | hypothetical protein X975 17435 partial                    | custom          |
| NA                | 895            | PREDICTED:transmembrane protein 131-like                   | nr              |
| NA                | 896            | putative oxidoreductase GLYR1-like protein partial         | custom          |
| NA                | 897            | Protein mothers against dpp partial                        | custom          |
| NA                | 903            | hypothetical protein X975 20223 partial                    | custom          |
| NA                | 909            | RRP12-like protein partial                                 | custom          |
| 89759             | 910            | Sodium- and chloride-dependent GABA transporter 1 partial  | custom          |
| NA                | 911            | Differentially expressed in FDCP 8-like protein partial    | custom          |
| 89701             | 912            | Zinc finger RNA-binding protein partial                    | custom          |

Supplemental Table 3 – continued from previous page

| Arthropod Core ID | Spider Core ID | Putative Ortholog Description                                | Target Database |
|-------------------|----------------|--------------------------------------------------------------|-----------------|
| NA                | 914            | Serine/threonine-protein kinase minibrain partial            | custom          |
| NA                | 915            | MOG interacting and ectopic P-granules protein 1 partial     | custom          |
| NA                | 916            | Splicing factor proline- and glutamine-rich partial          | custom          |
| 90537             | 917            | Eukaryotic translation initiation factor 3 subunit A partial | custom          |
| NA                | 918            | putative phospholipase B-like 2 partial                      | custom          |
| NA                | 921            | 28S ribosomal protein S23 mitochondrial partial              | custom          |
| NA                | 922            | Alpha-L-fucosidase partial                                   | custom          |
| NA                | 924            | Phosphoinositide 3-kinase regulatory subunit 4 partial       | custom          |
| NA                | 925            | Cellular tumor antigen p53 partial                           | custom          |
| NA                | 927            | 3-hydroxy-3-methylglutaryl-coenzyme A reductase partial      | custom          |
| 90382             | 929            | Paraplegin partial                                           | custom          |
| NA                | 931            | Protein phosphatase 1 regulatory subunit 16A partial         | custom          |
| NA                | 932            | Choline kinase alpha partial                                 | custom          |
| NA                | 934            | NA                                                           | nr              |
| NA                | 935            | GTP-binding protein 1 partial                                | custom          |
| NA                | 936            | Excitatory amino acid transporter 2 partial                  | custom          |
| NA                | 937            | hypothetical protein X975 06292 partial                      | custom          |
| NA                | 939            | Serine proteinase stubble partial                            | custom          |



Supplemental Table 3 – continued from previous page

| Arthropod Core ID | Spider Core ID | Putative Ortholog Description                               | Target Database |
|-------------------|----------------|-------------------------------------------------------------|-----------------|
| NA                | 940            | Macrophage man-nose receptor 1 partial                      | custom          |
| NA                | 942            | hypothetical protein X975 27120 partial                     | custom          |
| NA                | 944            | hypothetical protein X975 12055 partial                     | custom          |
| NA                | 945            | hypothetical protein X975 24338 partial                     | custom          |
| NA                | 947            | Insulin receptor sub-strate 2-B partial                     | custom          |
| 90168             | 948            | Glycerol-3-phosphate dehydroge-nase mitochondrial partial   | custom          |
| 89758             | 950            | Alanine-glyoxylate aminotransferase 2 mitochondrial partial | custom          |
| NA                | 952            | Cystathionine beta-synthase partial                         | custom          |
| 90181             | 953            | Transmembrane GT-Pase Marf partial                          | custom          |
| 89904             | 954            | Cell division cycle protein 23-like pro-tein partial        | custom          |
| NA                | 961            | hypothetical protein X975 05470 partial                     | custom          |
| NA                | 969            | Elongation factor 1-<br>alpha 1 partial                     | custom          |
| NA                | 970            | Armadillo repeat-containing protein 8 partial               | custom          |
| NA                | 973            | Titin partial                                               | custom          |
| NA                | 975            | Tetratricopeptide re-peat protein 38 partial                | custom          |
| NA                | 976            | Sodium/potassium/calcium exchanger 6 partial                | custom          |
| NA                | 978            | Alkyldihydroxyacetonephosphate synthase peroxisomal partial | custom          |
| NA                | 979            | putative cation-transporting ATPase 13A3 partial            | custom          |
| 89884             | 980            | Exportin-2 partial                                          | custom          |
| NA                | 981            | hypothetical protein X975 08408 partial                     | custom          |
| NA                | 982            | Vinculin partial                                            | custom          |

Supplemental Table 3 – continued from previous page

| Arthropod Core ID | Spider Core ID | Putative Ortholog Description                             | Target Database |
|-------------------|----------------|-----------------------------------------------------------|-----------------|
| NA                | 984            | Plastin-2 partial                                         | custom          |
| NA                | 985            | OTU domain-containing protein 5 partial                   | custom          |
| NA                | 987            | Ran-binding protein 9 partial                             | custom          |
| NA                | 988            | Splicing factor 3B subunit 3 partial                      | custom          |
| 90165             | 992            | Coatomer subunit gamma-2 partial                          | custom          |
| NA                | 993            | Next to BRCA1 1 protein partial                           | custom          |
| NA                | 994            | Transforming protein p54/c-ets-1 partial                  | custom          |
| NA                | 996            | hypothetical protein X975 15012 partial                   | custom          |
| NA                | 997            | Vigilin partial                                           | custom          |
| NA                | 998            | CUB and sushi domain-containing protein 3 partial         | custom          |
| 89857             | 1000           | Peroxisomal multi-functional enzyme type 2 partial        | custom          |
| 90292             | 1001           | Nck-associated protein 1 partial                          | custom          |
| NA                | 1003           | Segmentation protein cap'n'collar partial                 | custom          |
| NA                | 1004           | Sodium/hydrogen exchanger 7 partial                       | custom          |
| NA                | 1007           | cAMP-specific 3'5'-cyclic phosphodiesterase 7B partial    | custom          |
| NA                | 1008           | RNA-binding protein 28 partial                            | custom          |
| NA                | 1010           | Acetolactate synthase-like protein partial                | custom          |
| NA                | 1011           | Cytosolic 10-formyltetrahydrofolate dehydrogenase partial | custom          |
| NA                | 1012           | Polynucleotide 5'-hydroxyl-kinase NOL9 partial            | custom          |
| NA                | 1015           | Zinc transporter ZIP9-A partial                           | custom          |

**Supplemental Table 3 – continued from previous page**

| <b>Arthropod Core ID</b> | <b>Spider Core ID</b> | <b>Putative Ortholog Description</b>                             | <b>Target Database</b> |
|--------------------------|-----------------------|------------------------------------------------------------------|------------------------|
| NA                       | 1016                  | Calcium/calmodulin-dependent protein kinase kinase 2 partial     | custom                 |
| NA                       | 1017                  | Phosphatidylinositide phosphatase SAC1 partial                   | custom                 |
| NA                       | 1019                  | hypothetical protein X975 10524 partial                          | custom                 |
| 90082                    | 1020                  | Calcium/calmodulin-dependent protein kinase type 1 partial       | custom                 |
| NA                       | 1023                  | hypothetical protein X975 22675 partial                          | custom                 |
| NA                       | 1024                  | Elongator complex protein 1 partial                              | custom                 |
| NA                       | 1030                  | Exocyst complex component 5 partial                              | custom                 |
| NA                       | 1034                  | Monocarboxylate transporter 9 partial                            | custom                 |
| NA                       | 1035                  | Double-stranded RNA-binding protein Staufen-like protein partial | custom                 |
| NA                       | 1036                  | FK506-binding protein 15 partial                                 | custom                 |
| NA                       | 1037                  | Vam6/Vps39-like protein partial                                  | custom                 |
| NA                       | 1040                  | Transmembrane and coiled-coil domains protein 2 partial          | custom                 |
| NA                       | 1041                  | LIM and SH3 domain protein Lasp partial                          | custom                 |
| NA                       | 1042                  | Metastasis-associated protein MTA1 partial                       | custom                 |
| NA                       | 1043                  | Sodium-independent sulfate anion transporter partial             | custom                 |
| NA                       | 1044                  | Oxidation resistance protein 1 partial                           | custom                 |
| NA                       | 1045                  | Lysosomal protective protein partial                             | custom                 |
| 90377                    | 1046                  | Dynamin-like protein mitochondrial partial                       | custom                 |
| 90302                    | 1047                  | U1 small nuclear ribonucleoprotein partial                       | custom                 |

**Supplemental Table 3 – continued from previous page**

| <b>Arthropod Core ID</b> | <b>Spider Core ID</b> | <b>Putative Ortholog Description</b>                             | <b>Target Database</b> |
|--------------------------|-----------------------|------------------------------------------------------------------|------------------------|
| NA                       | 1048                  | ADP-ribosylation factor GTPase-activating protein 2 partial      | custom                 |
| 90363                    | 1049                  | Phosphoenolpyruvate carboxykinase [GTP] mitochondrial partial    | custom                 |
| 90616                    | 1050                  | Phosphatidylinositol 3-kinase catalytic subunit type 3 partial   | custom                 |
| NA                       | 1051                  | YTH domain-containing protein 1 partial                          | custom                 |
| 90489                    | 1053                  | Dual oxidase 2 partial                                           | custom                 |
| 89815                    | 1054                  | Alpha-2-macroglobulin receptor-associated protein partial        | custom                 |
| NA                       | 1055                  | DnaJ-like protein subfamily B member 2 partial                   | custom                 |
| NA                       | 1056                  | Chromobox protein-like protein partial                           | custom                 |
| NA                       | 1058                  | RNA-binding protein MEX3B partial                                | custom                 |
| NA                       | 1059                  | DnaJ-like protein subfamily B member 4 partial                   | custom                 |
| NA                       | 1060                  | Golgin subfamily A member 2 partial                              | custom                 |
| 90096                    | 1063                  | Calcium-binding mitochondrial carrier protein Aralar1 partial    | custom                 |
| NA                       | 1064                  | hypothetical protein X975 02870 partial                          | custom                 |
| NA                       | 1065                  | Protein GDAP2-like protein partial                               | custom                 |
| NA                       | 1068                  | Rap guanine nucleotide exchange factor 4 partial                 | custom                 |
| NA                       | 1069                  | Cip1-interacting zinc finger protein partial                     | custom                 |
| 90585                    | 1070                  | Methylcrotonoyl-CoA carboxylase beta chain mitochondrial partial | custom                 |
| NA                       | 1071                  | Lysyl oxidase-like protein partial                               | custom                 |

**Supplemental Table 3 – continued from previous page**

| <b>Arthropod Core ID</b> | <b>Spider Core ID</b> | <b>Putative Ortholog Description</b>                                            | <b>Target Database</b> |
|--------------------------|-----------------------|---------------------------------------------------------------------------------|------------------------|
| NA                       | 1073                  | Multiple inositol polyphosphate phosphatase 1 partial                           | custom                 |
| NA                       | 1074                  | Transforming growth factor-beta-induced protein ig-h3 partial                   | custom                 |
| 89898                    | 1075                  | Succinate dehydrogenase [ubiquinone] flavoprotein subunit mitochondrial partial | custom                 |
| 90396                    | 1076                  | Transitional endoplasmic reticulum ATPase TER94 partial                         | custom                 |
| NA                       | 1077                  | hypothetical protein X975 21094 partial                                         | custom                 |
| 89711                    | 1079                  | Eukaryotic translation initiation factor 3 subunit B partial                    | custom                 |
| 90397                    | 1081                  | Coronin-7 partial                                                               | custom                 |
| 89991                    | 1082                  | Calsyntenin-1 partial                                                           | custom                 |
| NA                       | 1083                  | hypothetical protein X975 02271 partial                                         | custom                 |
| 89775                    | 1086                  | putative RNA-binding protein Luc7-like 2 partial                                | custom                 |
| NA                       | 1088                  | WD repeat-containing protein mio partial                                        | custom                 |
| NA                       | 1090                  | X-ray repair cross-complementing protein 5 partial                              | custom                 |
| NA                       | 1091                  | Protein PAT1-like protein partial                                               | custom                 |
| 89672                    | 1092                  | Signal transducer and activator of transcription 5A partial                     | custom                 |
| NA                       | 1096                  | Luc7-like protein 3 partial                                                     | custom                 |
| NA                       | 1097                  | Lymphoid-restricted membrane protein partial                                    | custom                 |
| NA                       | 1098                  | F-box only protein 18 partial                                                   | custom                 |
| NA                       | 1100                  | CREB-binding protein partial                                                    | custom                 |
| NA                       | 1101                  | Hephaestin-like protein 1 partial                                               | custom                 |

**Supplemental Table 3 – continued from previous page**

| <b>Arthropod Core ID</b> | <b>Spider Core ID</b> | <b>Putative Ortholog Description</b>                               | <b>Target Database</b> |
|--------------------------|-----------------------|--------------------------------------------------------------------|------------------------|
| NA                       | 1108                  | Cysteine protease ATG4B partial                                    | custom                 |
| NA                       | 1109                  | Serine/threonine-protein kinase LATS1 partial                      | custom                 |
| NA                       | 1110                  | Rhophilin-2 partial                                                | custom                 |
| NA                       | 1111                  | G protein-coupled receptor kinase 1 partial                        | custom                 |
| NA                       | 1118                  | Protein FAM172A partial                                            | custom                 |
| NA                       | 1119                  | ATP-dependent RNA helicase A partial                               | custom                 |
| 90362                    | 1122                  | Histone H3.3 partial                                               | custom                 |
| NA                       | 1123                  | 23-bisphosphoglycerate-independent phosphoglycerate mutase partial | custom                 |
| NA                       | 1124                  | Histone-arginine methyltransferase CARMER partial                  | custom                 |
| NA                       | 1125                  | hypothetical protein X975 00161 partial                            | custom                 |
| NA                       | 1126                  | Scaffold attachment factor B2 partial                              | custom                 |
| NA                       | 1127                  | Protein tweety partial                                             | custom                 |
| NA                       | 1129                  | Sodium/calcium exchanger 3 partial                                 | custom                 |
| 89834                    | 1130                  | DNA topoisomerase 1 partial                                        | custom                 |
| NA                       | 1131                  | Neurocalcin-like protein partial                                   | custom                 |
| 90042                    | 1132                  | Serine/threonine-protein kinase VRK1 partial                       | custom                 |
| NA                       | 1133                  | Transcriptional repressor protein YY1 partial                      | custom                 |
| NA                       | 1135                  | Glutaredoxin domain-containing cysteine-rich protein partial       | custom                 |
| NA                       | 1136                  | Cytoplasmic dynein 1 light intermediate chain 2 partial            | custom                 |
| NA                       | 1137                  | Lon protease-like protein peroxisomal partial                      | custom                 |
| NA                       | 1139                  | Metaxin-2 partial                                                  | custom                 |

Supplemental Table 3 – continued from previous page

| Arthropod Core ID | Spider Core ID | Putative Ortholog Description                                         | Target Database |
|-------------------|----------------|-----------------------------------------------------------------------|-----------------|
| NA                | 1140           | Programmed cell death protein 4 partial                               | custom          |
| NA                | 1141           | 5-aminolevulinate synthase nonspecific mitochondrial partial          | custom          |
| NA                | 1142           | NA                                                                    | nr              |
| 89885             | 1143           | putative ATP-dependent RNA helicase me31b partial                     | custom          |
| 90500             | 1144           | Nucleoside diphosphate-linked moiety X motif 19 mitochondrial partial | custom          |
| 90170             | 1146           | Thrombospondin-4 partial                                              | custom          |
| NA                | 1147           | hypothetical protein X975 14086 partial                               | custom          |
| NA                | 1148           | Protein FAM46C partial                                                | custom          |
| NA                | 1149           | hypothetical protein X975 05113 partial                               | custom          |
| NA                | 1150           | Thimet oligopeptidase partial                                         | custom          |
| NA                | 1152           | Cysteine sulfinic acid decarboxylase partial                          | custom          |
| NA                | 1153           | putative helicase with zinc finger partial                            | custom          |
| NA                | 1154           | Very long-chain specific acyl-CoA dehydrogenase mitochondrial partial | custom          |
| NA                | 1155           | Monocarboxylate transporter 12 partial                                | custom          |
| NA                | 1157           | Steryl-sulfatase partial                                              | custom          |
| 90559             | 1158           | Pre-mRNA-splicing factor RBM22 partial                                | custom          |
| NA                | 1159           | Protein KRI1-like protein partial                                     | custom          |
| NA                | 1160           | putative ATP-dependent RNA helicase DDX46 partial                     | custom          |
| NA                | 1163           | hypothetical protein X975 21286 partial                               | custom          |

Supplemental Table 3 – continued from previous page

| Arthropod Core ID | Spider Core ID | Putative Ortholog Description                                                           | Target Database |
|-------------------|----------------|-----------------------------------------------------------------------------------------|-----------------|
| NA                | 1164           | CDP-diacylglycerol-glycerol-3-phosphate 3-phosphatidyltransferase mitochondrial partial | custom          |
| NA                | 1165           | Zinc transporter 1 partial                                                              | custom          |
| NA                | 1166           | Ectonucleoside triphosphate diphosphohydrolase 5 partial                                | custom          |
| NA                | 1168           | Proton-coupled amino acid transporter 1 partial                                         | custom          |
| NA                | 1171           | Arylsulfatase B partial                                                                 | custom          |
| NA                | 1172           | Mitogen-activated protein kinase-binding protein 1 partial                              | custom          |
| NA                | 1179           | Protein scribble-like protein partial                                                   | custom          |
| NA                | 1180           | Transforming growth factor-beta receptor-associated protein 1 partial                   | custom          |
| NA                | 1181           | hypothetical protein X975 16365 partial                                                 | custom          |
| NA                | 1182           | Equilibrative nucleoside transporter 3 partial                                          | custom          |
| NA                | 1184           | F-box/WD repeat-containing protein 5 partial                                            | custom          |
| NA                | 1196           | Sodium-coupled monocarboxylate transporter 1 partial                                    | custom          |
| NA                | 1197           | Serine/threonine-protein kinase PINK1 mitochondrial partial                             | custom          |
| NA                | 1198           | hypothetical protein X975 26123 partial                                                 | custom          |
| NA                | 1199           | Beta-hexosaminidase subunit beta partial                                                | custom          |
| NA                | 1201           | Myelin expression factor 2 partial                                                      | custom          |



Supplemental Table 3 – continued from previous page

| Arthropod Core ID | Spider Core ID | Putative Ortholog Description                                     | Target Database |
|-------------------|----------------|-------------------------------------------------------------------|-----------------|
| 90633             | 1202           | Plasminogen activator inhibitor 1 RNA-binding protein partial     | custom          |
| NA                | 1203           | Survival of motor neuron-related-splicing factor 30 partial       | custom          |
| NA                | 1204           | hypothetical protein X975 05678 partial                           | custom          |
| NA                | 1205           | HBS1-like protein partial                                         | custom          |
| NA                | 1210           | EH domain-containing protein 1 partial                            | custom          |
| 89726             | 1211           | putative ferric-chelate reductase 1-like protein partial          | custom          |
| 90041             | 1212           | Multiple C2 and transmembrane domain-containing protein 2 partial | custom          |
| NA                | 1213           | Rab-like protein 1 partial                                        | custom          |
| NA                | 1215           | putative cation-transporting ATPase 13A1 partial                  | custom          |
| NA                | 1218           | V-type proton ATPase subunit H partial                            | custom          |
| NA                | 1219           | hypothetical protein X975 12591 partial                           | custom          |
| NA                | 1220           | Phosphatidylinositol phosphatase PTPRQ partial                    | custom          |
| NA                | 1221           | Protein SET partial                                               | custom          |
| NA                | 1222           | Tyrosine-protein phosphatase Lar partial                          | custom          |
| NA                | 1223           | Septin-2 partial                                                  | custom          |
| NA                | 1225           | Galactosylceramide sulfotransferase partial                       | custom          |
| NA                | 1226           | Microtubule-associated protein 2 partial                          | custom          |

**Supplemental Table 3 – continued from previous page**

| <b>Arthropod Core ID</b> | <b>Spider Core ID</b> | <b>Putative Ortholog Description</b>                                | <b>Target Database</b> |
|--------------------------|-----------------------|---------------------------------------------------------------------|------------------------|
| NA                       | 1227                  | Ubiquitin carboxyl-terminal hydrolase 4 partial                     | custom                 |
| NA                       | 1230                  | Spectrin beta chain partial                                         | custom                 |
| NA                       | 1231                  | Fasciclin-2 partial                                                 | custom                 |
| NA                       | 1233                  | Endothelin-converting enzyme 2 partial                              | custom                 |
| 90493                    | 1234                  | Zinc transporter 9 partial                                          | custom                 |
| NA                       | 1240                  | Coiled-coil and C2 domain-containing protein 1-like protein partial | custom                 |
| NA                       | 1241                  | Acyl-CoA-binding domain-containing protein 5-B partial              | custom                 |
| NA                       | 1242                  | Membralin partial                                                   | custom                 |
| NA                       | 1244                  | hypothetical protein X975 02454 partial                             | custom                 |
| NA                       | 1245                  | Cullin-2 partial                                                    | custom                 |
| NA                       | 1247                  | putative sodium-coupled neutral amino acid transporter 10 partial   | custom                 |
| 90080                    | 1248                  | N-alpha-acetyltransferase 25 NatB auxiliary subunit partial         | custom                 |
| NA                       | 1249                  | Sodium/hydrogen exchanger 8 partial                                 | custom                 |
| NA                       | 1252                  | Major vault protein partial                                         | custom                 |
| 90152                    | 1255                  | Nicalin-1 partial                                                   | custom                 |
| NA                       | 1257                  | NA                                                                  | nr                     |
| NA                       | 1258                  | Kinesin light chain partial                                         | custom                 |
| NA                       | 1260                  | Rabenosyn-5 partial                                                 | custom                 |
| 90518                    | 1261                  | Cohesin subunit SA-1 partial                                        | custom                 |
| 90087                    | 1265                  | DNA-directed RNA polymerase III subunit RPC1 partial                | custom                 |

**Supplemental Table 3 – continued from previous page**

| <b>Arthropod Core ID</b> | <b>Spider Core ID</b> | <b>Putative Ortholog Description</b>                                                     | <b>Target Database</b> |
|--------------------------|-----------------------|------------------------------------------------------------------------------------------|------------------------|
| 90575                    | 1279                  | Serine/threonine-protein phosphatase 2A regulatory subunit A alpha isoform partial       | custom                 |
| NA                       | 1280                  | Dynamin-1-like protein partial                                                           | custom                 |
| NA                       | 1281                  | Actin cytoplasmic partial                                                                | custom                 |
| NA                       | 1282                  | hypothetical protein X975 09546 partial                                                  | custom                 |
| NA                       | 1283                  | Sushi von Willebrand factor type A EGF and pentraxin domain-containing protein 1 partial | custom                 |
| NA                       | 1284                  | Cytosolic Fe-S cluster assembly factor nubp1 partial                                     | custom                 |
| NA                       | 1285                  | Alpha-aminoadipic semialdehyde dehydrogenase partial                                     | custom                 |
| 89794                    | 1286                  | Signal recognition particle protein partial                                              | custom                 |
| NA                       | 1287                  | Paxillin partial                                                                         | custom                 |
| NA                       | 1289                  | hypothetical protein X975 17880 partial                                                  | custom                 |
| NA                       | 1291                  | Protein sprint partial                                                                   | custom                 |
| 90113                    | 1292                  | Myelin expression factor 2 partial                                                       | custom                 |
| NA                       | 1293                  | Erlin-2-B partial                                                                        | custom                 |
| NA                       | 1294                  | Cold shock domain-containing protein E1 partial                                          | custom                 |
| NA                       | 1295                  | Alkaline phosphatase tissue-nonspecific isozyme partial                                  | custom                 |
| NA                       | 1297                  | hypothetical protein X975 04361 partial                                                  | custom                 |
| NA                       | 1298                  | WD repeat and SOCS box-containing protein 1 partial                                      | custom                 |
| NA                       | 1299                  | hypothetical protein X975 11777 partial                                                  | custom                 |
| NA                       | 1302                  | DNA-binding protein D-ETS-4 partial                                                      | custom                 |

Supplemental Table 3 – continued from previous page

| Arthropod Core ID | Spider Core ID | Putative Ortholog Description                                             | Target Database |
|-------------------|----------------|---------------------------------------------------------------------------|-----------------|
| NA                | 1303           | Integrin-linked kinase-associated serine/threonine phosphatase 2C partial | custom          |
| NA                | 1304           | NADPH-cytochrome P450 reductase partial                                   | custom          |
| NA                | 1305           | Myosin light chain kinase smooth muscle partial                           | custom          |
| 89960             | 1310           | mRNA export factor partial                                                | custom          |
| NA                | 1312           | 6-phosphogluconate dehydrogenase decarboxylating partial                  | custom          |
| NA                | 1313           | Multiple PDZ domain protein partial                                       | custom          |
| NA                | 1314           | Hemocytin partial                                                         | custom          |
| NA                | 1316           | Oligopeptidase A partial                                                  | custom          |
| NA                | 1317           | hypothetical protein X975 14403 partial                                   | custom          |
| NA                | 1318           | Prestin partial                                                           | custom          |
| NA                | 1320           | Cysteine desulfurase mitochondrial partial                                | custom          |
| 90460             | 1323           | Nuclear protein localization protein 4-like protein partial               | custom          |
| 90319             | 1326           | Aspartate-tRNA ligase cytoplasmic partial                                 | custom          |
| NA                | 1327           | Mitochondrial inner membrane protein partial                              | custom          |
| 90138             | 1328           | hypothetical protein X975 03952 partial                                   | custom          |
| NA                | 1329           | Mitochondrial uncoupling protein 2 partial                                | custom          |
| NA                | 1331           | Ubiquitin carboxyl-terminal hydrolase 5 partial                           | custom          |
| NA                | 1335           | hypothetical protein X975 00748 partial                                   | custom          |
| NA                | 1338           | Exocyst complex component 3 partial                                       | custom          |

Supplemental Table 3 – continued from previous page

| Arthropod Core ID | Spider Core ID | Putative Ortholog Description                                         | Target Database |
|-------------------|----------------|-----------------------------------------------------------------------|-----------------|
| NA                | 1339           | hypothetical protein X975 23947 partial                               | custom          |
| 89721             | 1340           | Structural maintenance of chromosomes protein 1A partial              | custom          |
| NA                | 1344           | F-box only protein 7 partial                                          | custom          |
| NA                | 1347           | Dual oxidase maturation factor 1 partial                              | custom          |
| NA                | 1348           | THO complex subunit 2 partial                                         | custom          |
| NA                | 1354           | hypothetical protein X975 09429 partial                               | custom          |
| NA                | 1356           | Structural maintenance of chromosomes protein 4 partial               | custom          |
| NA                | 1357           | hypothetical protein X975 03670 partial                               | custom          |
| NA                | 1359           | Egl nine-like protein partial                                         | custom          |
| NA                | 1360           | Transmembrane protein 184B partial                                    | custom          |
| NA                | 1361           | Activating signal cointegrator 1 complex subunit 2 partial            | custom          |
| NA                | 1362           | Guanosine-3'5'-bis(diphosphate) 3'-pyrophosphohydrolase MESH1 partial | custom          |
| NA                | 1363           | Sorting nexin-25 partial                                              | custom          |
| NA                | 1364           | Mediator of RNA polymerase II transcription subunit 17 partial        | custom          |
| NA                | 1365           | Peroxisomal sarcosine oxidase partial                                 | custom          |
| NA                | 1367           | Ankyrin-2 partial                                                     | custom          |
| NA                | 1369           | Vacuolar protein sorting-associated protein 11-like protein partial   | custom          |
| NA                | 1371           | Epidermal growth factor receptor partial                              | custom          |

Supplemental Table 3 – continued from previous page

| Arthropod Core ID | Spider Core ID | Putative Ortholog Description                                         | Target Database |
|-------------------|----------------|-----------------------------------------------------------------------|-----------------|
| NA                | 1374           | Guanine nucleotide-binding protein G(s) subunit alpha isoform partial | custom          |
| NA                | 1375           | Zinc finger protein 26 partial                                        | custom          |
| NA                | 1376           | hypothetical protein X975 05252 partial                               | custom          |
| NA                | 1378           | Ribosomal protein S6 kinase 2 alpha partial                           | custom          |
| NA                | 1379           | Symplekin partial                                                     | custom          |
| NA                | 1380           | Nuclear pore complex protein Nup205 partial                           | custom          |
| NA                | 1382           | GRIP1-associated protein 1 partial                                    | custom          |
| 90332             | 1391           | N-terminal kinase-like protein partial                                | custom          |
| NA                | 1392           | Lamin Dm0 partial                                                     | custom          |
| NA                | 1393           | Phosphoserine phosphatase partial                                     | custom          |
| NA                | 1394           | Mitochondrial Rho GTPase 1 partial                                    | custom          |
| NA                | 1396           | Radixin partial                                                       | custom          |
| NA                | 1397           | Selenide water dikinase partial                                       | custom          |
| NA                | 1398           | ATPase family AAA domain-containing protein 3 partial                 | custom          |
| NA                | 1402           | Vacuolar protein sorting-associated protein 18-like protein partial   | custom          |
| 90617             | 1403           | REST corepressor 3 partial                                            | custom          |
| NA                | 1404           | Zinc finger protein round partial                                     | custom          |
| NA                | 1406           | hypothetical protein X975 01518 partial                               | custom          |
| 90188             | 1407           | putative rRNA-processing protein EBP2 partial                         | custom          |
| NA                | 1408           | Protein-L-isoaspartate(D-aspartate) O-methyltransferase partial       | custom          |

Supplemental Table 3 – continued from previous page

| Arthropod Core ID | Spider Core ID | Putative Ortholog Description                                                   | Target Database |
|-------------------|----------------|---------------------------------------------------------------------------------|-----------------|
| NA                | 1412           | Eukaryotic translation initiation factor 3 subunit D partial                    | custom          |
| NA                | 1413           | PI-PLC X domain-containing protein 3 partial                                    | custom          |
| NA                | 1415           | Stromal interaction molecule-like protein partial                               | custom          |
| NA                | 1416           | Vesicle-fusing ATPase 1 partial                                                 | custom          |
| NA                | 1417           | Hsp90 co-chaperone Cdc37 partial                                                | custom          |
| 89894             | 1418           | Ras-related protein Rab-5C partial                                              | custom          |
| NA                | 1419           | Protein Red partial                                                             | custom          |
| NA                | 1420           | Iron/zinc purple acid phosphatase-like protein partial                          | custom          |
| NA                | 1421           | hypothetical protein X975 05682 partial                                         | custom          |
| NA                | 1422           | Dolichyl-diphosphooligosaccharide-protein glycosyltransferase subunit 2 partial | custom          |
| 90586             | 1424           | Nucleolar protein 56 partial                                                    | custom          |
| NA                | 1425           | hypothetical protein X975 11637 partial                                         | custom          |
| 89929             | 1426           | Glutamate dehydrogenase mitochondrial partial                                   | custom          |
| NA                | 1427           | Protein IWS1-like protein partial                                               | custom          |
| NA                | 1428           | Prolyl endopeptidase partial                                                    | custom          |
| NA                | 1429           | putative glutamine-tRNA ligase partial                                          | custom          |
| NA                | 1431           | Monocarboxylate transporter 9 partial                                           | custom          |
| NA                | 1435           | FYVE RhoGEF and PH domain-containing protein 6 partial                          | custom          |
| NA                | 1437           | Serine/threonine-protein kinase TBK1 partial                                    | custom          |

**Supplemental Table 3 – continued from previous page**

| <b>Arthropod Core ID</b> | <b>Spider Core ID</b> | <b>Putative Ortholog Description</b>                                                                  | <b>Target Database</b> |
|--------------------------|-----------------------|-------------------------------------------------------------------------------------------------------|------------------------|
| NA                       | 1438                  | Protein Smaug-like protein partial                                                                    | custom                 |
| NA                       | 1440                  | Mitochondrial import inner membrane translocase subunit TIM50 partial                                 | custom                 |
| NA                       | 1441                  | hypothetical protein X975 19160 partial                                                               | custom                 |
| NA                       | 1442                  | SWI/SNF-related matrix-associated actin-dependent regulator of chromatin subfamily B member 1 partial | custom                 |
| NA                       | 1443                  | Brain-specific angiogenesis inhibitor 1-associated protein 2 partial                                  | custom                 |
| NA                       | 1444                  | Mediator of RNA polymerase II transcription subunit 16 partial                                        | custom                 |
| NA                       | 1445                  | Translocation protein SEC63-like protein partial                                                      | custom                 |
| NA                       | 1449                  | Dual oxidase partial                                                                                  | custom                 |
| NA                       | 1450                  | Zinc finger protein 143 partial                                                                       | custom                 |
| NA                       | 1451                  | DnaJ-like protein subfamily C member 16 partial                                                       | custom                 |
| NA                       | 1452                  | Cyclin-D-binding Myb-like transcription factor 1 partial                                              | custom                 |
| NA                       | 1456                  | Solute carrier family 15 member 2 partial                                                             | custom                 |
| NA                       | 1458                  | COP9 signalosome complex subunit 1 partial                                                            | custom                 |
| NA                       | 1462                  | hypothetical protein X975 13615 partial                                                               | custom                 |
| NA                       | 1465                  | TGF-beta receptor type-1 partial                                                                      | custom                 |
| NA                       | 1470                  | Cleavage and polyadenylation specificity factor subunit 2 partial                                     | custom                 |
| NA                       | 1474                  | Endophilin-B1 partial                                                                                 | custom                 |



Supplemental Table 3 – continued from previous page

| Arthropod Core ID | Spider Core ID | Putative Ortholog Description                                                  | Target Database |
|-------------------|----------------|--------------------------------------------------------------------------------|-----------------|
| NA                | 1476           | Conserved oligomeric Golgi complex subunit 6 partial                           | custom          |
| NA                | 1477           | Terminal uridylyltransferase 4 partial                                         | custom          |
| NA                | 1481           | Hairy/enhancer-of-split related with YRPW motif protein 1 partial              | custom          |
| NA                | 1482           | Rho GTPase-activating protein 39 partial                                       | custom          |
| NA                | 1487           | Microtubule-associated protein futsch partial                                  | custom          |
| 90502             | 1493           | Electron transfer flavoprotein-ubiquinone oxidoreductase mitochondrial partial | custom          |
| NA                | 1495           | Calsequestrin-2 partial                                                        | custom          |
| 90009             | 1496           | Caspase-1 partial                                                              | custom          |
| NA                | 1498           | Glycogenin-2 partial                                                           | custom          |
| NA                | 1500           | UV excision repair protein RAD23-like protein partial                          | custom          |
| NA                | 1501           | Yorkie-like protein partial                                                    | custom          |
| NA                | 1502           | hypothetical protein X975 11550 partial                                        | custom          |
| NA                | 1504           | hypothetical protein X975 08113 partial                                        | custom          |
| NA                | 1505           | Caprin-1 partial                                                               | custom          |
| NA                | 1506           | AT-rich interactive domain-containing protein 4B partial                       | custom          |
| NA                | 1507           | Mitochondrial import receptor subunit TOM70 partial                            | custom          |
| 89831             | 1508           | V-type proton ATPase catalytic subunit A partial                               | custom          |

Supplemental Table 3 – continued from previous page

| Arthropod Core ID | Spider Core ID | Putative Ortholog Description                                | Target Database |
|-------------------|----------------|--------------------------------------------------------------|-----------------|
| NA                | 1509           | S-adenosylmethionine decarboxylase proenzyme partial         | custom          |
| NA                | 1510           | ATP-dependent zinc metalloprotease YME1-like protein partial | custom          |
| NA                | 1513           | Rab11 family-interacting protein 4A partial                  | custom          |
| NA                | 1515           | Ocellar opsin partial                                        | custom          |
| NA                | 1516           | Pleckstrin domain-containing family G member 1 partial       | custom          |
| NA                | 1518           | WD repeat-containing protein 43 partial                      | custom          |
| NA                | 1519           | Src substrate protein p85 partial                            | custom          |
| NA                | 1520           | Ran-binding protein 3 partial                                | custom          |
| NA                | 1522           | Peroxisomal membrane protein PEX13 partial                   | custom          |
| NA                | 1523           | PX domain-containing protein kinase-like protein partial     | custom          |
| NA                | 1525           | Intron-binding protein aquarius partial                      | custom          |
| NA                | 1527           | Sorting nexin-32 partial                                     | custom          |
| NA                | 1528           | putative rRNA methyltransferase 3 partial                    | custom          |
| NA                | 1529           | Transmembrane protein 184C partial                           | custom          |
| NA                | 1531           | Nuclear factor related to kappa-B-binding protein partial    | custom          |
| NA                | 1532           | Protein PRRC1 partial                                        | custom          |
| 90643             | 1533           | Homeobox protein extradenticle partial                       | custom          |
| NA                | 1534           | Elongator complex protein 3 partial                          | custom          |

Supplemental Table 3 – continued from previous page

| Arthropod Core ID | Spider Core ID | Putative Ortholog Description                                      | Target Database |
|-------------------|----------------|--------------------------------------------------------------------|-----------------|
| NA                | 1535           | X-ray repair cross-complementing protein 5 partial                 | custom          |
| NA                | 1536           | hypothetical protein X975 21837 partial                            | custom          |
| NA                | 1537           | SH3 domain-binding glutamic acid-rich protein-like protein partial | custom          |
| NA                | 1539           | Coproporphyrinogen-III oxidase partial                             | custom          |
| 90417             | 1540           | putative protein-like protein partial                              | custom          |
| NA                | 1542           | Renin receptor partial                                             | custom          |
| NA                | 1543           | Serine/threonine-protein kinase PRP4-like protein partial          | custom          |
| 90249             | 1545           | Minor histocompatibility antigen H13 partial                       | custom          |
| NA                | 1546           | LIM domain kinase 1 partial                                        | custom          |
| NA                | 1547           | Monocarboxylate transporter 10 partial                             | custom          |
| NA                | 1548           | Aldo-keto reductase family 1 member B10 partial                    | custom          |
| NA                | 1552           | Dual specificity mitogen-activated protein kinase kinase 1 partial | custom          |
| NA                | 1554           | Transmembrane 9 superfamily member 2 partial                       | custom          |
| NA                | 1555           | Trans-2-enoyl-CoA reductase mitochondrial partial                  | custom          |
| NA                | 1556           | Aspartate aminotransferase cytoplasmic partial                     | custom          |
| NA                | 1557           | Thioredoxin reductase 1 cytoplasmic partial                        | custom          |
| NA                | 1558           | Beta-amyloid-like protein partial                                  | custom          |
| NA                | 1559           | hypothetical protein X975 17569 partial                            | custom          |

**Supplemental Table 3 – continued from previous page**

| <b>Arthropod Core ID</b> | <b>Spider Core ID</b> | <b>Putative Ortholog Description</b>                                          | <b>Target Database</b> |
|--------------------------|-----------------------|-------------------------------------------------------------------------------|------------------------|
| 90656                    | 1560                  | heat shock protein mitochondrial partial                                      | custom                 |
| NA                       | 1561                  | Glucose-6-phosphate 1-dehydrogenase partial                                   | custom                 |
| NA                       | 1563                  | Serum response factor-binding protein 1 partial                               | custom                 |
| NA                       | 1564                  | 2-amino-3-ketobutyrate coenzyme A ligase mitochondrial partial                | custom                 |
| 90085                    | 1565                  | RuvB-like 2 partial                                                           | custom                 |
| NA                       | 1567                  | Phosphoribosyl pyrophosphate synthase-associated protein 2 partial            | custom                 |
| 90626                    | 1568                  | Mitochondrial 2-oxoglutarate/malate carrier protein partial                   | custom                 |
| NA                       | 1572                  | Protein HEXIM partial                                                         | custom                 |
| NA                       | 1573                  | Succinyl-CoA ligase [ADP-forming] subunit beta mitochondrial partial          | custom                 |
| NA                       | 1574                  | Importin-4 partial                                                            | custom                 |
| NA                       | 1576                  | hypothetical protein X975 01772 partial                                       | custom                 |
| NA                       | 1577                  | Techylectin-5B partial                                                        | custom                 |
| NA                       | 1578                  | Periostin partial                                                             | custom                 |
| 90424                    | 1579                  | Dolichyl-diphosphooligosaccharide-protein glycosyltransferase subunit partial | custom                 |
| NA                       | 1580                  | Peptidyl-prolyl cis-trans isomerase FKBP4 partial                             | custom                 |
| NA                       | 1581                  | hypothetical protein X975 06760 partial                                       | custom                 |
| NA                       | 1582                  | hypothetical protein X975 25386 partial                                       | custom                 |
| 90059                    | 1583                  | T-complex protein 1 subunit beta partial                                      | custom                 |
| NA                       | 1584                  | Trifunctional enzyme subunit alpha mitochondrial partial                      | custom                 |

**Supplemental Table 3 – continued from previous page**

| <b>Arthropod Core ID</b> | <b>Spider Core ID</b> | <b>Putative Ortholog Description</b>                                 | <b>Target Database</b> |
|--------------------------|-----------------------|----------------------------------------------------------------------|------------------------|
| NA                       | 1585                  | Tetratricopeptide repeat protein 4 partial                           | custom                 |
| NA                       | 1587                  | Pumilio domain-containing protein partial                            | custom                 |
| 90482                    | 1588                  | DnaJ-like protein sub-family C member 2 partial                      | custom                 |
| NA                       | 1589                  | DET1- and DDB1-associated protein 1 partial                          | custom                 |
| NA                       | 1590                  | DNA damage-regulated autophagy modulator protein 1 partial           | custom                 |
| NA                       | 1591                  | mRNA-capping enzyme partial                                          | custom                 |
| NA                       | 1592                  | Pyruvate carboxylase mitochondrial partial                           | custom                 |
| NA                       | 1596                  | Sphingomyelin phosphodiesterase D LrSicTox-alphaB1 partial           | custom                 |
| NA                       | 1597                  | hypothetical protein X975 05837 partial                              | custom                 |
| NA                       | 1598                  | Calpain-7 partial                                                    | custom                 |
| NA                       | 1601                  | Vesicle-associated membrane protein 7 partial                        | custom                 |
| 89906                    | 1602                  | Peroxisome assembly factor 2 partial                                 | custom                 |
| NA                       | 1606                  | Zinc finger protein 768 partial                                      | custom                 |
| 89870                    | 1609                  | Integrator complex subunit 6-A partial                               | custom                 |
| NA                       | 1610                  | Exocyst complex component 4 partial                                  | custom                 |
| NA                       | 1611                  | Acidic mammalian chitinase partial                                   | custom                 |
| NA                       | 1612                  | Leucine-rich repeat and calponin domain-containing protein 1 partial | custom                 |
| NA                       | 1613                  | Otopetrin-2 partial                                                  | custom                 |
| NA                       | 1614                  | Serine/threonine-protein kinase pelle partial                        | custom                 |

**Supplemental Table 3 – continued from previous page**

| <b>Arthropod Core ID</b> | <b>Spider Core ID</b> | <b>Putative Ortholog Description</b>                                     | <b>Target Database</b> |
|--------------------------|-----------------------|--------------------------------------------------------------------------|------------------------|
| NA                       | 1617                  | Replication protein A subunit partial                                    | custom                 |
| NA                       | 1620                  | hypothetical protein X975 06323 partial                                  | custom                 |
| NA                       | 1622                  | Maltase-glucoamylase intestinal partial                                  | custom                 |
| NA                       | 1627                  | Excitatory amino acid transporter 3 partial                              | custom                 |
| NA                       | 1629                  | F-box only protein 11 partial                                            | custom                 |
| NA                       | 1630                  | Ankyrin repeat and FYVE domain-containing protein 1 partial              | custom                 |
| NA                       | 1631                  | Protein osteopotential-like protein partial                              | custom                 |
| 90231                    | 1633                  | E3 ubiquitin-protein ligase MARCH6 partial                               | custom                 |
| NA                       | 1646                  | Serine/threonine-protein phosphatase PP1-gamma catalytic subunit partial | custom                 |
| NA                       | 1649                  | Retinoid isomerohydrolase partial                                        | custom                 |
| NA                       | 1650                  | Rho GTPase-activating protein 28 partial                                 | custom                 |
| NA                       | 1651                  | Protein phosphatase 1 regulatory subunit 12A partial                     | custom                 |
| NA                       | 1652                  | hypothetical protein X975 01699 partial                                  | custom                 |
| NA                       | 1653                  | ATP-binding cassette sub-family F member 2 partial                       | custom                 |
| 90207                    | 1654                  | AP-1 complex subunit gamma-1 partial                                     | custom                 |
| NA                       | 1656                  | putative ATP-dependent RNA helicase DDX47 partial                        | custom                 |
| NA                       | 1657                  | hypothetical protein X975 25774 partial                                  | custom                 |

Supplemental Table 3 – continued from previous page

| Arthropod Core ID | Spider Core ID | Putative Ortholog Description                                     | Target Database |
|-------------------|----------------|-------------------------------------------------------------------|-----------------|
| NA                | 1658           | Cell division cycle protein 27-like protein partial               | custom          |
| NA                | 1659           | Actin cytoplasmic partial                                         | custom          |
| NA                | 1660           | hypothetical protein X975 24063 partial                           | custom          |
| NA                | 1661           | Eukaryotic translation initiation factor 5 partial                | custom          |
| 89662             | 1662           | Far upstream element-binding protein 1 partial                    | custom          |
| NA                | 1663           | Cysteine string protein partial                                   | custom          |
| NA                | 1664           | Protein toll partial                                              | custom          |
| NA                | 1665           | NF-X1-type zinc finger protein NFXL1 partial                      | custom          |
| NA                | 1668           | Glycerol-3-phosphate acyl-transferase 4 partial                   | custom          |
| NA                | 1669           | hypothetical protein X975 25298 partial                           | custom          |
| 89877             | 1670           | Regulator of non-sense transcripts 2 partial                      | custom          |
| NA                | 1671           | Scavenger receptor class B member 1 partial                       | custom          |
| 90245             | 1673           | Nucleolar GTP-binding protein 2 partial                           | custom          |
| NA                | 1674           | Dynactin subunit 1 partial                                        | custom          |
| 90291             | 1675           | Cleavage and polyadenylation specificity factor subunit 6 partial | custom          |
| 90400             | 1676           | V-type proton ATPase subunit d 1 partial                          | custom          |
| NA                | 1678           | hypothetical protein X975 18972 partial                           | custom          |
| NA                | 1679           | Notchless protein-like protein partial                            | custom          |

Supplemental Table 3 – continued from previous page

| Arthropod Core ID | Spider Core ID | Putative Ortholog Description                                     | Target Database |
|-------------------|----------------|-------------------------------------------------------------------|-----------------|
| NA                | 1680           | Enhancer of mRNA-decapping protein 4 partial                      | custom          |
| NA                | 1681           | Nuclear pore complex protein Nup107 partial                       | custom          |
| NA                | 1682           | Inositol monophosphatase 2 partial                                | custom          |
| NA                | 1683           | putative sulfite oxidase mitochondrial partial                    | custom          |
| NA                | 1684           | NSFL1 cofactor p47 partial                                        | custom          |
| NA                | 1685           | Glucosidase 2 subunit beta partial                                | custom          |
| NA                | 1686           | Glycogenin-1 partial                                              | custom          |
| NA                | 1687           | 26S proteasome non-ATPase regulatory subunit 14 partial           | custom          |
| NA                | 1688           | Amyloid protein-binding protein 2 partial                         | custom          |
| NA                | 1689           | Cytosolic carboxypeptidase 1 partial                              | custom          |
| 89947             | 1690           | 2-oxoisovalerate dehydrogenase subunit beta mitochondrial partial | custom          |
| NA                | 1692           | hypothetical protein X975 22465 partial                           | custom          |
| NA                | 1693           | B(0+)-type amino acid transporter 1 partial                       | custom          |
| 90137             | 1694           | Protein disulfide-isomerase A6 partial                            | custom          |
| 90455             | 1696           | Nucleolar protein 16 partial                                      | custom          |
| 90309             | 1698           | Phosphoserine phosphatase partial                                 | custom          |
| 89683             | 1699           | Calnexin partial                                                  | custom          |
| NA                | 1701           | ATP-binding cassette sub-family F member 3 partial                | custom          |
| 90296             | 1702           | 26S proteasome non-ATPase regulatory subunit 12 partial           | custom          |



**Supplemental Table 3 – continued from previous page**

| <b>Arthropod Core ID</b> | <b>Spider Core ID</b> | <b>Putative Ortholog Description</b>                                | <b>Target Database</b> |
|--------------------------|-----------------------|---------------------------------------------------------------------|------------------------|
| 90619                    | 1703                  | Zygotic DNA replication licensing factor mcm6-B partial             | custom                 |
| 90020                    | 1704                  | RuvB-like 1 partial                                                 | custom                 |
| NA                       | 1705                  | hypothetical protein X975 13285 partial                             | custom                 |
| NA                       | 1707                  | Transforming growth factor-beta-induced protein ig-h3 partial       | custom                 |
| NA                       | 1709                  | Actin-related protein 2 partial                                     | custom                 |
| NA                       | 1710                  | AP-2 complex subunit mu partial                                     | custom                 |
| NA                       | 1711                  | Inositol-trisphosphate 3-kinase B partial                           | custom                 |
| NA                       | 1712                  | hypothetical protein X975 06095 partial                             | custom                 |
| NA                       | 1713                  | Alpha-ketoglutarate-dependent dioxygenase alkB-like protein partial | custom                 |
| NA                       | 1715                  | Serine/threonine-protein kinase pim-3 partial                       | custom                 |
| NA                       | 1718                  | hypothetical protein X975 14727 partial                             | custom                 |
| NA                       | 1719                  | Serine/threonine-protein kinase RIO3 partial                        | custom                 |
| 90106                    | 1720                  | U4/U6 small nuclear ribonucleoprotein Prp31 partial                 | custom                 |
| 89783                    | 1722                  | T-complex protein 1 subunit eta partial                             | custom                 |
| 89916                    | 1723                  | Coatomer subunit delta partial                                      | custom                 |
| NA                       | 1724                  | ATPase family AAA domain-containing protein 1-B partial             | custom                 |
| NA                       | 1725                  | PTB domain-containing engulfment adapter protein 1 partial          | custom                 |
| NA                       | 1726                  | hypothetical protein X975 15128 partial                             | custom                 |
| NA                       | 1727                  | hypothetical protein X975 10062 partial                             | custom                 |

**Supplemental Table 3 – continued from previous page**

| <b>Arthropod Core ID</b> | <b>Spider Core ID</b> | <b>Putative Ortholog Description</b>                           | <b>Target Database</b> |
|--------------------------|-----------------------|----------------------------------------------------------------|------------------------|
| 89850                    | 1729                  | Importin-5 partial                                             | custom                 |
| NA                       | 1730                  | hypothetical protein X975 18273 partial                        | custom                 |
| NA                       | 1731                  | Lysine-tRNA ligase partial                                     | custom                 |
| NA                       | 1732                  | Early growth response protein 1 partial                        | custom                 |
| 90590                    | 1733                  | tRNA pseudouridine synthase A mitochondrial partial            | custom                 |
| 89738                    | 1734                  | DnaJ-like protein subfamily C member 3 partial                 | custom                 |
| 89746                    | 1735                  | WD repeat-containing protein 7 partial                         | custom                 |
| NA                       | 1736                  | Presequence protease mitochondrial partial                     | custom                 |
| 89961                    | 1737                  | 39S ribosomal protein L22 mitochondrial partial                | custom                 |
| NA                       | 1739                  | Translation initiation factor eIF-2B subunit epsilon partial   | custom                 |
| NA                       | 1740                  | Eukaryotic translation initiation factor 3 subunit E-A partial | custom                 |
| 90058                    | 1741                  | PREDICTED:pescadillo-like                                      | nr                     |
| NA                       | 1743                  | BSD domain-containing protein 1 partial                        | custom                 |
| NA                       | 1744                  | Angiomotin partial                                             | custom                 |
| NA                       | 1746                  | Lateral signaling target protein 2-like protein partial        | custom                 |
| 90368                    | 1747                  | hypothetical protein X975 18921 partial                        | custom                 |
| NA                       | 1749                  | Neutral alpha-glucosidase AB partial                           | custom                 |
| NA                       | 1750                  | hypothetical protein X975 25520 partial                        | custom                 |
| NA                       | 1751                  | Conserved oligomeric Golgi complex subunit 1 partial           | custom                 |

Supplemental Table 3 – continued from previous page

| Arthropod Core ID | Spider Core ID | Putative Ortholog Description                                          | Target Database |
|-------------------|----------------|------------------------------------------------------------------------|-----------------|
| 89754             | 1752           | Serine/threonine-protein kinase RIO2 partial                           | custom          |
| NA                | 1756           | MOB kinase activator-like 2 partial                                    | custom          |
| NA                | 1760           | Nesprin-1 partial                                                      | custom          |
| 89958             | 1761           | Pre-mRNA-processing factor 6 partial                                   | custom          |
| NA                | 1762           | Nuclear hormone receptor HR96 partial                                  | custom          |
| NA                | 1764           | Leucine-rich repeats and immunoglobulin-like domains protein 3 partial | custom          |
| NA                | 1767           | FAST kinase domain-containing protein 2 partial                        | custom          |
| NA                | 1768           | Splicing factor suppressor of white-apricot-like protein partial       | custom          |
| NA                | 1769           | hypothetical protein X975 14597 partial                                | custom          |
| NA                | 1771           | hypothetical protein X975 06629 partial                                | custom          |
| 90429             | 1774           | 1-phosphatidylinositol-3-phosphate 5-kinase partial                    | custom          |
| NA                | 1775           | Ubiquitin carboxyl-terminal hydrolase 10 partial                       | custom          |
| NA                | 1778           | Leucine-rich repeat protein 1 partial                                  | custom          |
| NA                | 1781           | Epithelial chloride channel protein partial                            | custom          |
| NA                | 1783           | Protein phosphatase 1 regulatory subunit 14B partial                   | custom          |
| NA                | 1784           | PREDICTED:syntaxin-17-like                                             | nr              |
| 90177             | 1785           | Cap-specific mRNA (nucleoside-2'-O)-methyltransferase 1 partial        | custom          |

Supplemental Table 3 – continued from previous page

| Arthropod Core ID | Spider Core ID | Putative Ortholog Description                                                | Target Database |
|-------------------|----------------|------------------------------------------------------------------------------|-----------------|
| NA                | 1787           | Anaphase-promoting complex subunit 2 partial                                 | custom          |
| NA                | 1789           | Histone deacetylase 6 partial                                                | custom          |
| 89823             | 1790           | Phosphatidylserine decarboxylase proenzyme partial                           | custom          |
| NA                | 1791           | Major facilitator superfamily domain-containing protein 1 partial            | custom          |
| NA                | 1792           | hypothetical protein X975 10476 partial                                      | custom          |
| NA                | 1795           | Rab proteins geranyl-geranyltransferase component A 1 partial                | custom          |
| NA                | 1797           | Fat-like cadherin-related tumor suppressor-like protein partial              | custom          |
| NA                | 1798           | Fidgetin-like protein 1 partial                                              | custom          |
| 89728             | 1800           | Transportin-1 partial                                                        | custom          |
| 90576             | 1806           | ATP-binding cassette sub-family D member 2 partial                           | custom          |
| NA                | 1808           | hypothetical protein X975 03993 partial                                      | custom          |
| NA                | 1812           | Phosphofurin acidic cluster sorting protein 2 partial                        | custom          |
| 90610             | 1814           | Lysine-specific demethylase 6A partial                                       | custom          |
| NA                | 1822           | PREDICTED:Golgi-associated PDZ and coiled-coil motif-containing protein-like | nr              |
| NA                | 1824           | Heterogeneous nuclear ribonucleoprotein H partial                            | custom          |
| NA                | 1825           | H/ACA ribonucleoprotein complex subunit 4 partial                            | custom          |
| NA                | 1827           | NA                                                                           | nr              |

**Supplemental Table 3 – continued from previous page**

| <b>Arthropod Core ID</b> | <b>Spider Core ID</b> | <b>Putative Ortholog Description</b>                            | <b>Target Database</b> |
|--------------------------|-----------------------|-----------------------------------------------------------------|------------------------|
| 89952                    | 1828                  | tRNA-dihydrouridine(20) synthase [NAD(P)+]-like protein partial | custom                 |
| NA                       | 1829                  | 14-3-3 protein epsilon partial                                  | custom                 |
| 90278                    | 1830                  | Double-stranded RNA-specific adenosine deaminase partial        | custom                 |
| NA                       | 1831                  | Mitochondrial glutamate carrier 1 partial                       | custom                 |
| NA                       | 1832                  | Dimethylglycine dehydrogenase mitochondrial partial             | custom                 |
| NA                       | 1833                  | Hormone-sensitive lipase partial                                | custom                 |
| NA                       | 1834                  | UBX domain-containing protein 4                                 | nr                     |
| NA                       | 1835                  | Nucleosome assembly protein 1-like 4 partial                    | custom                 |
| NA                       | 1836                  | Protein bric-a-brac 1 partial                                   | custom                 |
| NA                       | 1837                  | hypothetical protein X975 09406 partial                         | custom                 |
| NA                       | 1838                  | Dehydrolichyl diphosphate synthase partial                      | custom                 |
| NA                       | 1841                  | SRSF protein kinase 1 partial                                   | custom                 |
| NA                       | 1842                  | E3 ubiquitin-protein ligase KCMF1 partial                       | custom                 |
| NA                       | 1843                  | hypothetical protein X975 08235 partial                         | custom                 |
| 90209                    | 1844                  | Splicing factor U2AF subunit partial                            | custom                 |
| 89674                    | 1845                  | 2-hydroxyacyl-CoA lyase 1 partial                               | custom                 |
| NA                       | 1846                  | Sorting nexin-2 partial                                         | custom                 |
| NA                       | 1848                  | Clusterin-associated protein 1-like protein partial             | custom                 |
| 89676                    | 1849                  | Tripeptidyl-peptidase 2 partial                                 | custom                 |

**Supplemental Table 3 – continued from previous page**

| <b>Arthropod Core ID</b> | <b>Spider Core ID</b> | <b>Putative Ortholog Description</b>                                        | <b>Target Database</b> |
|--------------------------|-----------------------|-----------------------------------------------------------------------------|------------------------|
| NA                       | 1850                  | Vascular endothelial growth factor receptor 3 partial                       | custom                 |
| NA                       | 1851                  | Protein FAM192A partial                                                     | custom                 |
| NA                       | 1852                  | Calmodulin partial                                                          | custom                 |
| NA                       | 1853                  | Transducin beta-like protein 3 partial                                      | custom                 |
| NA                       | 1854                  | Transcription factor Sox-6 partial                                          | custom                 |
| NA                       | 1855                  | Microfibrillar-associated protein 1 partial                                 | custom                 |
| NA                       | 1857                  | putative ribosome biogenesis protein partial                                | custom                 |
| NA                       | 1858                  | Enoyl-CoA delta isomerase 2 mitochondrial partial                           | custom                 |
| NA                       | 1859                  | Protein canopy 4 partial                                                    | custom                 |
| NA                       | 1860                  | Carnitine O-acetyltransferase partial                                       | custom                 |
| NA                       | 1861                  | putative isocitrate dehydrogenase [NAD] subunit alpha mitochondrial partial | custom                 |
| NA                       | 1862                  | Folliculin partial                                                          | custom                 |
| NA                       | 1864                  | 26S proteasome non-ATPase regulatory subunit 7 partial                      | custom                 |
| NA                       | 1866                  | 14-alpha-glucan-branching enzyme partial                                    | custom                 |
| NA                       | 1868                  | ELAV-like protein 2 partial                                                 | custom                 |
| NA                       | 1870                  | RAC serine/threonine-protein kinase partial                                 | custom                 |
| 90227                    | 1873                  | 26S proteasome non-ATPase regulatory subunit 11 partial                     | custom                 |
| NA                       | 1874                  | Delta-aminolevulinic acid dehydratase partial                               | custom                 |
| NA                       | 1876                  | putative oxidoreductase partial                                             | custom                 |

**Supplemental Table 3 – continued from previous page**

| <b>Arthropod Core ID</b> | <b>Spider Core ID</b> | <b>Putative Ortholog Description</b>                                        | <b>Target Database</b> |
|--------------------------|-----------------------|-----------------------------------------------------------------------------|------------------------|
| NA                       | 1879                  | Tryptophan–tRNA ligase cytoplasmic partial                                  | custom                 |
| 89979                    | 1880                  | 5'-AMP-activated protein kinase catalytic subunit alpha-2 partial           | custom                 |
| NA                       | 1882                  | Integrin-linked protein kinase partial                                      | custom                 |
| NA                       | 1883                  | Methylmalonate-semialdehyde dehydrogenase [acylating] mitochondrial partial | custom                 |
| 90597                    | 1885                  | 26S protease regulatory subunit 7 partial                                   | custom                 |
| NA                       | 1886                  | Thioredoxin domain-containing protein 5 partial                             | custom                 |
| NA                       | 1887                  | putative serpin-like protein partial                                        | custom                 |
| NA                       | 1888                  | Heterogeneous nuclear ribonucleoprotein F partial                           | custom                 |
| NA                       | 1890                  | Polyadenylate-binding protein-interacting protein 1 partial                 | custom                 |
| NA                       | 1891                  | Alanine–tRNA ligase cytoplasmic partial                                     | custom                 |
| NA                       | 1892                  | Adenylosuccinate synthetase partial                                         | custom                 |
| NA                       | 1893                  | SH2 domain-containing protein 3C partial                                    | custom                 |
| 89949                    | 1894                  | Pre-mRNA-splicing factor SLU7 partial                                       | custom                 |
| 89821                    | 1895                  | Inorganic pyrophosphatase partial                                           | custom                 |
| 90535                    | 1897                  | 26S proteasome non-ATPase regulatory subunit 2 partial                      | custom                 |
| NA                       | 1901                  | hypothetical protein X975 01182 partial                                     | custom                 |
| NA                       | 1902                  | Exocyst complex component 7 partial                                         | custom                 |
| NA                       | 1903                  | WASH complex subunit 7 partial                                              | custom                 |

**Supplemental Table 3 – continued from previous page**

| <b>Arthropod Core ID</b> | <b>Spider Core ID</b> | <b>Putative Ortholog Description</b>                                                   | <b>Target Database</b> |
|--------------------------|-----------------------|----------------------------------------------------------------------------------------|------------------------|
| NA                       | 1906                  | Organic cation transporter protein partial                                             | custom                 |
| NA                       | 1907                  | hypothetical protein X975 11906 partial                                                | custom                 |
| NA                       | 1908                  | Transmembrane protein 87A partial                                                      | custom                 |
| NA                       | 1911                  | Protein ROP partial                                                                    | custom                 |
| NA                       | 1912                  | BTB/POZ domain-containing adapter for CUL3-mediated RhoA degradation protein 3 partial | custom                 |
| NA                       | 1913                  | N-acetyllactosaminide beta-13-N-acetylglucosaminyltransferase partial                  | custom                 |
| NA                       | 1915                  | Mucolipin-3 partial                                                                    | custom                 |
| NA                       | 1916                  | hypothetical protein X975 02383 partial                                                | custom                 |
| NA                       | 1918                  | NF-kappa-B inhibitor cactus partial                                                    | custom                 |
| NA                       | 1919                  | N-acetylglucosamine-1-phosphotransferase subunit gamma partial                         | custom                 |
| NA                       | 1921                  | N-acetyltransferase 9-like protein partial                                             | custom                 |
| NA                       | 1922                  | Carbonic anhydrase 2 partial                                                           | custom                 |
| NA                       | 1924                  | RING finger protein nhl-1 partial                                                      | custom                 |
| NA                       | 1925                  | CBM21 domain-containing protein partial                                                | custom                 |
| 89732                    | 1927                  | N-acetylglucosaminyl-phosphatidylinositol biosynthetic protein partial                 | custom                 |
| NA                       | 1928                  | WD repeat-containing protein 11 partial                                                | custom                 |
| NA                       | 1930                  | putative methyltransferase NSUN4 partial                                               | custom                 |



Supplemental Table 3 – continued from previous page

| Arthropod Core ID | Spider Core ID | Putative Ortholog Description                                     | Target Database |
|-------------------|----------------|-------------------------------------------------------------------|-----------------|
| NA                | 1931           | 3-hydroxyanthranilate 3-lyase partial                             | custom          |
| NA                | 1932           | Splicing factor 3A subunit 2 partial                              | custom          |
| NA                | 1933           | Myotubularin-related protein 8 partial                            | custom          |
| NA                | 1934           | TNF receptor-associated factor 6 partial                          | custom          |
| NA                | 1935           | Myotubularin-related protein 9 partial                            | custom          |
| NA                | 1936           | Lysine-specific histone demethylase 1A partial                    | custom          |
| NA                | 1937           | Pre-mRNA-splicing regulator female-lethal(2)D partial             | custom          |
| NA                | 1939           | Chromatin accessibility complex protein 1 partial                 | custom          |
| NA                | 1940           | Dipeptidyl peptidase 9 partial                                    | custom          |
| NA                | 1946           | Cleft lip and palate transmembrane protein 1-like protein partial | custom          |
| NA                | 1949           | GC-rich sequence DNA-binding factor 1 partial                     | custom          |
| NA                | 1951           | hypothetical protein X975 00693 partial                           | custom          |
| NA                | 1956           | Kelch domain-containing protein 4 partial                         | custom          |
| NA                | 1958           | Iduronate 2-sulfatase partial                                     | custom          |
| NA                | 1959           | Protein bicaudal D partial                                        | custom          |
| NA                | 1960           | Pro-interleukin-16 partial                                        | custom          |
| NA                | 1961           | hypothetical protein X975 10251 partial                           | custom          |
| NA                | 1962           | Inosine-5'-monophosphate dehydrogenase 1 partial                  | custom          |

Supplemental Table 3 – continued from previous page

| Arthropod Core ID | Spider Core ID | Putative Ortholog Description                                     | Target Database |
|-------------------|----------------|-------------------------------------------------------------------|-----------------|
| 90477             | 1964           | Protein phosphatase PTC7-like protein partial                     | custom          |
| NA                | 1966           | WD repeat-containing protein 75 partial                           | custom          |
| NA                | 1967           | hypothetical protein X975 13894 partial                           | custom          |
| 89687             | 1969           | DNA topoisomerase 3-beta-1 partial                                | custom          |
| NA                | 1971           | tRNA-dihydrouridine(47) synthase [NAD(P)(+)]-like protein partial | custom          |
| NA                | 1980           | F-box/LRR-repeat protein 2 partial                                | custom          |
| NA                | 1981           | Ubiquilin-1 partial                                               | custom          |
| NA                | 1982           | Protein SDA1-like protein partial                                 | custom          |
| 90553             | 1984           | hypothetical protein X975 24184 partial                           | custom          |
| NA                | 1986           | Polypyrimidine tract-binding protein 2 partial                    | custom          |
| NA                | 1988           | Tyrosine-protein kinase transmembrane receptor ROR1 partial       | custom          |
| NA                | 1989           | hypothetical protein X975 10634 partial                           | custom          |
| NA                | 1990           | NFX1-type zinc finger-containing protein 1 partial                | custom          |
| NA                | 1991           | E3 ubiquitin-protein ligase synoviolin B partial                  | custom          |
| NA                | 1992           | hypothetical protein X975 25549 partial                           | custom          |
| NA                | 1993           | hypothetical protein X975 27039 partial                           | custom          |
| NA                | 1994           | 60S ribosomal protein L3 partial                                  | custom          |
| NA                | 1995           | L-asparaginase partial                                            | custom          |
| NA                | 1999           | Ethanolamine-phosphate cytidylyl-transferase partial              | custom          |

**Supplemental Table 3 – continued from previous page**

| <b>Arthropod Core ID</b> | <b>Spider Core ID</b> | <b>Putative Ortholog Description</b>                                           | <b>Target Database</b> |
|--------------------------|-----------------------|--------------------------------------------------------------------------------|------------------------|
| NA                       | 2000                  | Methylmalonic aciduria and homocystinuria type D protein mitochondrial partial | custom                 |
| NA                       | 2001                  | Nostrin partial                                                                | custom                 |
| NA                       | 2004                  | Mannose-1-phosphate guanyl-transferase alpha-B partial                         | custom                 |
| NA                       | 2005                  | Protein held out wing partial                                                  | custom                 |
| NA                       | 2006                  | hypothetical protein X975 03273 partial                                        | custom                 |
| NA                       | 2007                  | putative lysine-specific demethylase 4B partial                                | custom                 |
| NA                       | 2008                  | MIF4G domain-containing protein A partial                                      | custom                 |
| NA                       | 2009                  | Histidine triad nucleotide-binding protein 2 mitochondrial partial             | custom                 |
| NA                       | 2010                  | Nose resistant to fluoxetine protein 6 partial                                 | custom                 |
| NA                       | 2013                  | Inhibitor of nuclear factor kappa-B kinase subunit beta partial                | custom                 |
| NA                       | 2015                  | Pre-mRNA-splicing factor SYF1 partial                                          | custom                 |
| NA                       | 2016                  | Pre-rRNA-processing protein TSR1-like protein partial                          | custom                 |
| 90376                    | 2018                  | Methylthioribose-1-phosphate isomerase partial                                 | custom                 |
| NA                       | 2020                  | GAS2-like protein 1 partial                                                    | custom                 |
| NA                       | 2022                  | DDRKGK domain-containing protein 1 partial                                     | custom                 |
| NA                       | 2023                  | DDB1- and CUL4-associated factor 13 partial                                    | custom                 |
| NA                       | 2024                  | Sugar phosphate exchanger 3 partial                                            | custom                 |

**Supplemental Table 3 – continued from previous page**

| <b>Arthropod Core ID</b> | <b>Spider Core ID</b> | <b>Putative Ortholog Description</b>                                                                                    | <b>Target Database</b> |
|--------------------------|-----------------------|-------------------------------------------------------------------------------------------------------------------------|------------------------|
| 89921                    | 2025                  | hypothetical protein X975 13109 partial                                                                                 | custom                 |
| NA                       | 2028                  | Williams-Beuren syndrome chromosomal region 16 protein-like protein partial                                             | custom                 |
| NA                       | 2030                  | hypothetical protein X975 08621 partial                                                                                 | custom                 |
| NA                       | 2031                  | Transmembrane 9 superfamily member 3 partial                                                                            | custom                 |
| 89710                    | 2032                  | V-type proton ATPase subunit B partial                                                                                  | custom                 |
| NA                       | 2033                  | Steroidogenic acute regulatory protein mitochondrial partial                                                            | custom                 |
| NA                       | 2034                  | Tubulointerstitial nephritis antigen-like protein partial                                                               | custom                 |
| NA                       | 2036                  | HIV Tat-specific factor 1 partial                                                                                       | custom                 |
| NA                       | 2037                  | Nucleoredoxin-like protein 2 partial                                                                                    | custom                 |
| 89845                    | 2038                  | Sideroflexin-1 partial                                                                                                  | custom                 |
| NA                       | 2040                  | COP9 signalosome complex subunit 2 partial                                                                              | custom                 |
| 90436                    | 2041                  | Dihydrolipoyllysine-residue succinyltransferase component of 2-oxoglutarate dehydrogenase complex mitochondrial partial | custom                 |
| 89999                    | 2042                  | Lupus La protein partial                                                                                                | custom                 |
| NA                       | 2043                  | hypothetical protein X975 05087 partial                                                                                 | custom                 |
| NA                       | 2045                  | Lissencephaly-1-like protein partial                                                                                    | custom                 |
| NA                       | 2046                  | Nucleolar protein 58 partial                                                                                            | custom                 |
| 90375                    | 2047                  | Delta-1-pyrroline-5-carboxylate dehydrogenase mitochondrial partial                                                     | custom                 |
| NA                       | 2048                  | T-complex protein 1 subunit theta partial                                                                               | custom                 |

**Supplemental Table 3 – continued from previous page**

| <b>Arthropod Core ID</b> | <b>Spider Core ID</b> | <b>Putative Ortholog Description</b>                                        | <b>Target Database</b> |
|--------------------------|-----------------------|-----------------------------------------------------------------------------|------------------------|
| NA                       | 2049                  | ATP-binding cassette sub-family E member 1 partial                          | custom                 |
| NA                       | 2050                  | Protein disulfide-isomerase TMX3 partial                                    | custom                 |
| NA                       | 2053                  | Inhibin beta B chain partial                                                | custom                 |
| NA                       | 2054                  | RING finger protein 31 partial                                              | custom                 |
| NA                       | 2055                  | Protein Gawky partial                                                       | custom                 |
| 89827                    | 2056                  | Methionine aminopeptidase 2 partial                                         | custom                 |
| NA                       | 2057                  | Zinc transporter SLC39A7 partial                                            | custom                 |
| NA                       | 2059                  | Deoxyribonuclease-2 partial                                                 | custom                 |
| NA                       | 2060                  | Protein ERGIC-53 partial                                                    | custom                 |
| NA                       | 2062                  | hypothetical protein X975 23445 partial                                     | custom                 |
| NA                       | 2067                  | MAM domain-containing glycosylphosphatidylinositol anchor protein 1 partial | custom                 |
| NA                       | 2069                  | Glutathione S-transferase theta-1 partial                                   | custom                 |
| NA                       | 2075                  | mRNA-decapping enzyme 2 partial                                             | custom                 |
| NA                       | 2078                  | Beta-13-glucosyltransferase partial                                         | custom                 |
| NA                       | 2079                  | CCAAT/enhancer-binding protein zeta partial                                 | custom                 |
| 90011                    | 2080                  | putative ATP-dependent RNA helicase DDX27 partial                           | custom                 |
| NA                       | 2081                  | Endoplasmic reticulum resident protein 44 partial                           | custom                 |
| NA                       | 2082                  | Mitoferrin-2 partial                                                        | custom                 |
| NA                       | 2086                  | Galactokinase partial                                                       | custom                 |

**Supplemental Table 3 – continued from previous page**

| <b>Arthropod Core ID</b> | <b>Spider Core ID</b> | <b>Putative Ortholog Description</b>                                  | <b>Target Database</b> |
|--------------------------|-----------------------|-----------------------------------------------------------------------|------------------------|
| 89977                    | 2088                  | Pyridoxal-dependent decarboxylase domain-containing protein 1 partial | custom                 |
| NA                       | 2089                  | Protein AHNAK2 partial                                                | custom                 |
| 89771                    | 2090                  | Splicing factor 3A subunit 3 partial                                  | custom                 |
| NA                       | 2092                  | Phenylalanine-tRNA ligase alpha subunit B partial                     | custom                 |
| NA                       | 2096                  | Calcyphosin-like protein partial                                      | custom                 |
| NA                       | 2097                  | U1 small nuclear ribonucleoprotein C partial                          | custom                 |
| NA                       | 2099                  | Coiled-coil domain-containing protein 22-like protein partial         | custom                 |
| NA                       | 2100                  | Transmembrane protein 214-B partial                                   | custom                 |
| NA                       | 2101                  | Eukaryotic elongation factor 2 kinase partial                         | custom                 |
| NA                       | 2102                  | ATP-dependent RNA helicase SUV3-like protein mitochondrial partial    | custom                 |
| NA                       | 2103                  | Metallophosphoesterase 1 partial                                      | custom                 |
| NA                       | 2104                  | Carbonyl reductase [NADPH] 1 partial                                  | custom                 |
| NA                       | 2108                  | Abhydrolase domain-containing protein 4 partial                       | custom                 |
| NA                       | 2109                  | Protein maelstrom-like protein partial                                | custom                 |
| NA                       | 2110                  | U3 small nucleolar RNA-associated protein 15-like protein partial     | custom                 |
| NA                       | 2113                  | Transmembrane 9 superfamily member 2 partial                          | custom                 |
| NA                       | 2114                  | hypothetical protein X975 09833 partial                               | custom                 |

**Supplemental Table 3 – continued from previous page**

| <b>Arthropod Core ID</b> | <b>Spider Core ID</b> | <b>Putative Ortholog Description</b>                             | <b>Target Database</b> |
|--------------------------|-----------------------|------------------------------------------------------------------|------------------------|
| NA                       | 2117                  | DNA mismatch repair protein Msh2 partial                         | custom                 |
| 90172                    | 2118                  | Kinesin-associated protein 3 partial                             | custom                 |
| NA                       | 2119                  | hypothetical protein X975 25921 partial                          | custom                 |
| NA                       | 2120                  | Bicaudal D-related protein-like protein partial                  | custom                 |
| NA                       | 2121                  | Transmembrane protein partial                                    | custom                 |
| NA                       | 2122                  | Mitochondrial-processing peptidase subunit alpha partial         | custom                 |
| NA                       | 2123                  | Betabeta-carotene 1515'-monooxygenase partial                    | custom                 |
| NA                       | 2125                  | putative ribosomal RNA methyltransferase NOP2 partial            | custom                 |
| NA                       | 2126                  | hypothetical protein X975 09051 partial                          | custom                 |
| NA                       | 2127                  | Protein slowmo partial                                           | custom                 |
| NA                       | 2129                  | Group XV phospholipase A2 partial                                | custom                 |
| NA                       | 2130                  | FAD-dependent oxidoreductase domain-containing protein 1 partial | custom                 |
| NA                       | 2132                  | Dual specificity protein phosphatase 8 partial                   | custom                 |
| NA                       | 2134                  | Ras-related protein Rab-10 partial                               | custom                 |
| NA                       | 2135                  | FAS-associated factor 1 partial                                  | custom                 |
| NA                       | 2136                  | Acyl-CoA synthetase family member 3 mitochondrial partial        | custom                 |
| 90006                    | 2139                  | Sorting nexin-27 partial                                         | custom                 |
| NA                       | 2142                  | hypothetical protein X975 05027 partial                          | custom                 |
| NA                       | 2146                  | hypothetical protein X975 01440 partial                          | custom                 |

**Supplemental Table 3 – continued from previous page**

| <b>Arthropod Core ID</b> | <b>Spider Core ID</b> | <b>Putative Ortholog Description</b>                                  | <b>Target Database</b> |
|--------------------------|-----------------------|-----------------------------------------------------------------------|------------------------|
| 90544                    | 2149                  | Piwi-like protein 1 partial                                           | custom                 |
| 89840                    | 2151                  | Splicing factor 3B subunit 2 partial                                  | custom                 |
| NA                       | 2153                  | Cysteine/serine-rich nuclear protein 3 partial                        | custom                 |
| 90452                    | 2154                  | Parafibromin partial                                                  | custom                 |
| NA                       | 2157                  | Protein lap4 partial                                                  | custom                 |
| NA                       | 2163                  | Regulator of G-protein signaling 12 partial                           | custom                 |
| NA                       | 2164                  | TBC1 domain family member 14 partial                                  | custom                 |
| 89872                    | 2165                  | Leucine-rich repeat protein soc-2-like protein partial                | custom                 |
| NA                       | 2166                  | tRNA wybutosine-synthesizing protein 1-like protein partial           | custom                 |
| NA                       | 2167                  | hypothetical protein X975 00044 partial                               | custom                 |
| NA                       | 2178                  | Cytochrome P450 4V2 partial                                           | custom                 |
| NA                       | 2183                  | Zinc finger protein 622 partial                                       | custom                 |
| NA                       | 2184                  | Serine hydroxymethyltransferase mitochondrial partial                 | custom                 |
| NA                       | 2185                  | ABC transporter G family member 23 partial                            | custom                 |
| NA                       | 2187                  | Acidic leucine-rich nuclear phosphoprotein 32 family member A partial | custom                 |
| 90325                    | 2188                  | Inositol monophosphatase 3 partial                                    | custom                 |
| 90196                    | 2189                  | 26S proteasome non-ATPase regulatory subunit 4 partial                | custom                 |
| NA                       | 2190                  | Signal transducing adapter molecule 1 partial                         | custom                 |
| NA                       | 2191                  | hypothetical protein X975 19620 partial                               | custom                 |
| NA                       | 2193                  | ADP/ATP translocase 1 partial                                         | custom                 |



**Supplemental Table 3 – continued from previous page**

| <b>Arthropod Core ID</b> | <b>Spider Core ID</b> | <b>Putative Ortholog Description</b>                                                                            | <b>Target Database</b> |
|--------------------------|-----------------------|-----------------------------------------------------------------------------------------------------------------|------------------------|
| 90184                    | 2194                  | Trifunctional enzyme subunit beta mitochondrial partial                                                         | custom                 |
| NA                       | 2195                  | Prolactin regulatory element-binding protein partial                                                            | custom                 |
| NA                       | 2196                  | putative signal peptidase complex subunit 2 partial                                                             | custom                 |
| NA                       | 2197                  | Nucleoporin p58/p45 partial                                                                                     | custom                 |
| NA                       | 2198                  | 26S proteasome non-ATPase regulatory subunit 6 partial                                                          | custom                 |
| NA                       | 2201                  | Eukaryotic translation initiation factor 3 subunit M partial                                                    | custom                 |
| NA                       | 2202                  | Dihydrolipoyllysine-residue acetyltransferase component of pyruvate dehydrogenase complex mitochondrial partial | custom                 |
| NA                       | 2203                  | Suppressor of SWI4 1-like protein partial                                                                       | custom                 |
| NA                       | 2204                  | Integral membrane protein 2B partial                                                                            | custom                 |
| NA                       | 2205                  | Rho GTPase-activating protein 100F partial                                                                      | custom                 |
| 89971                    | 2207                  | hypothetical protein X975 05150 partial                                                                         | custom                 |
| NA                       | 2209                  | Nitrogen permease regulator 3-like protein partial                                                              | custom                 |
| NA                       | 2210                  | ADP-ribosylation factor GTPase-activating protein 1 partial                                                     | custom                 |
| NA                       | 2213                  | 3-hydroxybutyryl-CoA dehydrogenase partial                                                                      | custom                 |
| NA                       | 2214                  | Palmitoyltransferase ZDHHC2 partial                                                                             | custom                 |
| NA                       | 2215                  | 3-hydroxyisobutyrate dehydrogenase mitochondrial partial                                                        | custom                 |
| NA                       | 2216                  | hypothetical protein X975 05086 partial                                                                         | custom                 |

Supplemental Table 3 – continued from previous page

| Arthropod Core ID | Spider Core ID | Putative Ortholog Description                                                  | Target Database |
|-------------------|----------------|--------------------------------------------------------------------------------|-----------------|
| NA                | 2217           | WD repeat domain phosphoinositide-interacting protein 2 partial                | custom          |
| 90208             | 2219           | hypothetical protein X975 16574 partial                                        | custom          |
| NA                | 2222           | Protein SMG9 partial                                                           | custom          |
| 90194             | 2223           | 26S protease regulatory subunit 8 partial                                      | custom          |
| NA                | 2225           | BAG domain-containing protein Samui partial                                    | custom          |
| NA                | 2227           | Cytosolic Fe-S cluster assembly factor nubp1 partial                           | custom          |
| NA                | 2228           | hypothetical protein X975 05242 partial                                        | custom          |
| 90560             | 2229           | Peroxiredoxin 1 partial                                                        | custom          |
| NA                | 2230           | HEAT repeat-containing protein 3 partial                                       | custom          |
| NA                | 2233           | Small glutamine-rich tetratricopeptide repeat-containing protein alpha partial | custom          |
| NA                | 2234           | Arginine-tRNA ligase cytoplasmic partial                                       | custom          |
| 89874             | 2235           | Transcription elongation factor S-II partial                                   | custom          |
| NA                | 2236           | Suppressor of fused-like protein partial                                       | custom          |
| 89873             | 2239           | Thioredoxin-like protein 1 partial                                             | custom          |
| NA                | 2240           | Replication protein A DNA-binding subunit partial                              | custom          |
| 90513             | 2241           | NA                                                                             | nr              |
| NA                | 2243           | Protein disulfide-isomerase A5 partial                                         | custom          |
| NA                | 2244           | Paramyosin partial                                                             | custom          |
| NA                | 2245           | G-protein coupled receptor 126 partial                                         | custom          |
| NA                | 2246           | DDB1- and CUL4-associated factor 8 partial                                     | custom          |

Supplemental Table 3 – continued from previous page

| Arthropod Core ID | Spider Core ID | Putative Ortholog Description                                                      | Target Database |
|-------------------|----------------|------------------------------------------------------------------------------------|-----------------|
| NA                | 2247           | BRCA1-associated protein partial                                                   | custom          |
| NA                | 2248           | Histone-binding protein RBBP4 partial                                              | custom          |
| 90485             | 2253           | NADH dehydrogenase [ubiquinone] 1 alpha subcomplex subunit 9 mitochondrial partial | custom          |
| 89788             | 2254           | hypothetical protein X975 02868 partial                                            | custom          |
| NA                | 2255           | Transcription initiation factor IIA subunit 1 partial                              | custom          |
| 90123             | 2256           | Ornithine aminotransferase mitochondrial partial                                   | custom          |
| 90243             | 2258           | Cysteine-tRNA ligase cytoplasmic partial                                           | custom          |
| NA                | 2259           | FAS-associated factor 2-B partial                                                  | custom          |
| NA                | 2262           | Bifunctional purine biosynthesis protein PURH partial                              | custom          |
| NA                | 2263           | Interferon regulatory factor 2-binding protein 2-B partial                         | custom          |
| 89833             | 2266           | Catalase partial                                                                   | custom          |
| NA                | 2267           | Nuclear factor interleukin-3-regulated protein partial                             | custom          |
| NA                | 2268           | NTF2-related export protein 2 partial                                              | custom          |
| NA                | 2269           | S-phase kinase-associated protein 1 partial                                        | custom          |
| NA                | 2270           | Dihydrolipoyl dehydrogenase mitochondrial partial                                  | custom          |
| 90253             | 2271           | Cdc42-like protein partial                                                         | custom          |
| 90088             | 2275           | Signal recognition particle protein partial                                        | custom          |
| NA                | 2276           | putative aminopeptidase partial                                                    | custom          |

**Supplemental Table 3 – continued from previous page**

| <b>Arthropod Core ID</b> | <b>Spider Core ID</b> | <b>Putative Ortholog Description</b>                                                     | <b>Target Database</b> |
|--------------------------|-----------------------|------------------------------------------------------------------------------------------|------------------------|
| NA                       | 2277                  | Y+L amino acid transporter 2 partial                                                     | custom                 |
| NA                       | 2279                  | Sushi von Willebrand factor type A EGF and pentraxin domain-containing protein 1 partial | custom                 |
| NA                       | 2281                  | GRIP and coiled-coil domain-containing protein 1 partial                                 | custom                 |
| NA                       | 2283                  | Neutral ceramidase partial                                                               | custom                 |
| NA                       | 2285                  | Vesicle transport through interaction with t-SNAREs-like protein 1B partial              | custom                 |
| NA                       | 2286                  | E3 ubiquitin-protein ligase MARCH5 partial                                               | custom                 |
| NA                       | 2287                  | Acidic fibroblast growth factor intracellular-binding protein partial                    | custom                 |
| NA                       | 2289                  | Ran GTPase-activating protein 1 partial                                                  | custom                 |
| NA                       | 2290                  | Methylosome subunit pICln partial                                                        | custom                 |
| NA                       | 2291                  | Transcription initiation factor TFIID subunit 12 partial                                 | custom                 |
| NA                       | 2292                  | Zinc finger protein 407 partial                                                          | custom                 |
| NA                       | 2293                  | Regulator of non-sense transcripts 3A partial                                            | custom                 |
| NA                       | 2294                  | RNA polymerase II-associated factor 1-like protein partial                               | custom                 |
| 90395                    | 2297                  | SPRY domain-containing protein 7 partial                                                 | custom                 |
| NA                       | 2298                  | Stathmin-1-A partial                                                                     | custom                 |
| NA                       | 2299                  | U4/U6.U5 tri-snRNP-associated protein 2 partial                                          | custom                 |
| NA                       | 2303                  | hypothetical protein X975 16956 partial                                                  | custom                 |

**Supplemental Table 3 – continued from previous page**

| <b>Arthropod Core ID</b> | <b>Spider Core ID</b> | <b>Putative Ortholog Description</b>                                 | <b>Target Database</b> |
|--------------------------|-----------------------|----------------------------------------------------------------------|------------------------|
| NA                       | 2304                  | Aprataxin partial                                                    | custom                 |
| NA                       | 2306                  | CWF19-like protein 2 partial                                         | custom                 |
| NA                       | 2307                  | BTB/POZ domain-containing protein 9 partial                          | custom                 |
| 90567                    | 2308                  | Transaldolase partial                                                | custom                 |
| NA                       | 2309                  | Josephin-1 partial                                                   | custom                 |
| NA                       | 2310                  | CAAX prenyl protease 1-like protein partial                          | custom                 |
| NA                       | 2312                  | Signal peptide peptidase-like 2B partial                             | custom                 |
| NA                       | 2315                  | Cell division cycle protein 16-like protein partial                  | custom                 |
| 90440                    | 2317                  | Ras-related protein Rab-35 partial                                   | custom                 |
| 89848                    | 2318                  | UBX domain-containing protein 6 partial                              | custom                 |
| NA                       | 2319                  | Synapse-associated protein 1 partial                                 | custom                 |
| NA                       | 2322                  | RalA-binding protein 1 partial                                       | custom                 |
| NA                       | 2324                  | Golgi apparatus protein 1 partial                                    | custom                 |
| NA                       | 2325                  | Nitrilase and fragile histidine triad fusion protein NitFhit partial | custom                 |
| 90587                    | 2331                  | 60S ribosomal protein L27a partial                                   | custom                 |
| NA                       | 2332                  | Suppressor of tumorigenicity 7 protein-like protein partial          | custom                 |
| 90508                    | 2334                  | Peroxiredoxin-6 partial                                              | custom                 |
| NA                       | 2337                  | hypothetical protein X975 26413 partial                              | custom                 |
| NA                       | 2341                  | Solute carrier family 35 member F5 partial                           | custom                 |
| NA                       | 2343                  | putative deoxyhypusine synthase partial                              | custom                 |
| NA                       | 2346                  | Intraflagellar transport protein 80-like protein partial             | custom                 |

**Supplemental Table 3 – continued from previous page**

| <b>Arthropod Core ID</b> | <b>Spider Core ID</b> | <b>Putative Ortholog Description</b>                                                                              | <b>Target Database</b> |
|--------------------------|-----------------------|-------------------------------------------------------------------------------------------------------------------|------------------------|
| 89727                    | 2347                  | Transcription initiation factor IIB partial                                                                       | custom                 |
| 90621                    | 2350                  | Oxysterol-binding protein-related protein 1 partial                                                               | custom                 |
| NA                       | 2354                  | Cytoskeleton-associated protein 5 partial                                                                         | custom                 |
| NA                       | 2360                  | hypothetical protein X975 00287 partial                                                                           | custom                 |
| NA                       | 2362                  | Neuroblastoma-amplified sequence partial                                                                          | custom                 |
| NA                       | 2364                  | hypothetical protein X975 00641 partial                                                                           | custom                 |
| NA                       | 2366                  | Ras-related protein ced-10 partial                                                                                | custom                 |
| NA                       | 2367                  | Lipoamide acyltransferase component of branched-chain alpha-keto acid dehydrogenase complex mitochondrial partial | custom                 |
| NA                       | 2369                  | SCO-spondin partial                                                                                               | custom                 |
| 89708                    | 2370                  | 39S ribosomal protein L48 mitochondrial partial                                                                   | custom                 |
| NA                       | 2371                  | Lysosomal protein NCU-G1 partial                                                                                  | custom                 |
| NA                       | 2373                  | Rab5 GDP/GTP exchange factor partial                                                                              | custom                 |
| NA                       | 2374                  | Serine/threonine-protein kinase PAK 1 partial                                                                     | custom                 |
| NA                       | 2376                  | Serine/threonine-protein kinase N2 partial                                                                        | custom                 |
| NA                       | 2378                  | hypothetical protein X975 25159 partial                                                                           | custom                 |
| NA                       | 2386                  | Cytochrome b5 reductase 4 partial                                                                                 | custom                 |
| NA                       | 2389                  | Growth hormone-regulated TBC protein 1-A partial                                                                  | custom                 |
| NA                       | 2396                  | SAM domain and HD domain-containing protein 1 partial                                                             | custom                 |

**Supplemental Table 3 – continued from previous page**

| <b>Arthropod Core ID</b> | <b>Spider Core ID</b> | <b>Putative Ortholog Description</b>                             | <b>Target Database</b> |
|--------------------------|-----------------------|------------------------------------------------------------------|------------------------|
| NA                       | 2402                  | hypothetical protein X975 04812 partial                          | custom                 |
| 90637                    | 2403                  | 3-phosphoinositide-dependent protein kinase 1 partial            | custom                 |
| NA                       | 2410                  | Ubiquitin-protein ligase E3C partial                             | custom                 |
| NA                       | 2418                  | Signal-induced proliferation-associated 1-like protein 2 partial | custom                 |
| NA                       | 2421                  | Geranylgeranyl pyrophosphate synthase partial                    | custom                 |
| NA                       | 2427                  | hypothetical protein X975 18306 partial                          | custom                 |
| NA                       | 2441                  | G kinase-anchoring protein 1 partial                             | custom                 |
| NA                       | 2442                  | Tyrosine-protein phosphatase non-receptor type 4 partial         | custom                 |
| NA                       | 2443                  | hypothetical protein X975 07353 partial                          | custom                 |
| NA                       | 2444                  | Sorting and assembly machinery component 50-like protein partial | custom                 |
| NA                       | 2445                  | Zinc phosphodiesterase ELAC protein 2 partial                    | custom                 |
| NA                       | 2446                  | Glycylpeptide N-tetradecanoyltransferase 1 partial               | custom                 |
| NA                       | 2447                  | hypothetical protein X975 14365 partial                          | custom                 |
| NA                       | 2448                  | NADP-dependent malic enzyme partial                              | custom                 |
| NA                       | 2449                  | ADP-sugar pyrophosphatase partial                                | custom                 |
| 89970                    | 2450                  | Phosphoserine aminotransferase partial                           | custom                 |
| NA                       | 2451                  | 28S ribosomal protein S35 mitochondrial partial                  | custom                 |
| NA                       | 2452                  | Autism susceptibility 2 protein partial                          | custom                 |

**Supplemental Table 3 – continued from previous page**

| <b>Arthropod Core ID</b> | <b>Spider Core ID</b> | <b>Putative Ortholog Description</b>                                       | <b>Target Database</b> |
|--------------------------|-----------------------|----------------------------------------------------------------------------|------------------------|
| NA                       | 2453                  | Protein FAM63B partial                                                     | custom                 |
| NA                       | 2454                  | hypothetical protein X975 07416 partial                                    | custom                 |
| NA                       | 2455                  | MKI67 FHA domain-interacting nucleolar phosphoprotein-like protein partial | custom                 |
| NA                       | 2456                  | Glucose-6-phosphate isomerase partial                                      | custom                 |
| NA                       | 2458                  | Neuroendocrine convertase 1 partial                                        | custom                 |
| 90652                    | 2460                  | PREDICTED: PRKCA-binding protein-like                                      | nr                     |
| NA                       | 2461                  | hypothetical protein X975 01092 partial                                    | custom                 |
| NA                       | 2462                  | hypothetical protein X975 17265 partial                                    | custom                 |
| NA                       | 2463                  | TAR DNA-binding protein 43 partial                                         | custom                 |
| NA                       | 2465                  | Isovaleryl-CoA dehydrogenase mitochondrial partial                         | custom                 |
| 90203                    | 2466                  | DnaJ-like protein subfamily B member 9 partial                             | custom                 |
| NA                       | 2468                  | ZZ-type zinc finger-containing protein 3 partial                           | custom                 |
| NA                       | 2469                  | Leucine-rich repeat-containing protein 49 partial                          | custom                 |
| NA                       | 2470                  | hypothetical protein X975 02761 partial                                    | custom                 |
| NA                       | 2471                  | Spliceosome RNA helicase DDX39B partial                                    | custom                 |
| NA                       | 2472                  | hypothetical protein X975 08449 partial                                    | custom                 |
| NA                       | 2473                  | NudC domain-containing protein 1 partial                                   | custom                 |
| NA                       | 2474                  | PRELI domain-containing protein 1 mitochondrial partial                    | custom                 |



**Supplemental Table 3 – continued from previous page**

| <b>Arthropod Core ID</b> | <b>Spider Core ID</b> | <b>Putative Ortholog Description</b>                             | <b>Target Database</b> |
|--------------------------|-----------------------|------------------------------------------------------------------|------------------------|
| NA                       | 2475                  | PREDICTED: centrosomal protein of 19 kDa-like                    | nr                     |
| NA                       | 2476                  | Lambda-crystallin-like protein partial                           | custom                 |
| NA                       | 2477                  | Elongator complex protein 2 partial                              | custom                 |
| NA                       | 2479                  | Serum amyloid A-2 protein partial                                | custom                 |
| NA                       | 2480                  | Ribonuclease 3 partial                                           | custom                 |
| 90442                    | 2482                  | Guanine nucleotide-binding protein-like 3-like protein partial   | custom                 |
| NA                       | 2483                  | Mediator of RNA polymerase II transcription subunit 11 partial   | custom                 |
| NA                       | 2484                  | Transducin beta-like protein 2 partial                           | custom                 |
| NA                       | 2485                  | putative E3 ubiquitin-protein ligase UBR7 partial                | custom                 |
| NA                       | 2487                  | Mitochondrial import receptor subunit TOM22-like protein partial | custom                 |
| 90211                    | 2488                  | 60S acidic ribosomal protein P0 partial                          | custom                 |
| NA                       | 2489                  | Peroxisomal acyl-coenzyme A oxidase 3 partial                    | custom                 |
| NA                       | 2490                  | 26S protease regulatory subunit 6B partial                       | custom                 |
| NA                       | 2491                  | Metaxin-1 partial                                                | custom                 |
| NA                       | 2492                  | E3 SUMO-protein ligase RanBP2 partial                            | custom                 |
| NA                       | 2493                  | Myeloid leukemia factor 1 partial                                | custom                 |
| 90438                    | 2494                  | Synaptosomal-associated protein 25 partial                       | custom                 |
| 90522                    | 2495                  | Profilin-5 partial                                               | custom                 |
| 89882                    | 2498                  | Transcription initiation factor TFIID subunit 5 partial          | custom                 |

Supplemental Table 3 – continued from previous page

| Arthropod Core ID | Spider Core ID | Putative Ortholog Description                                      | Target Database |
|-------------------|----------------|--------------------------------------------------------------------|-----------------|
| NA                | 2501           | Glycerol-3-phosphate dehydrogenase 1-like protein partial          | custom          |
| 89688             | 2503           | Peptide methionine sulfoxide reductase partial                     | custom          |
| NA                | 2504           | Gamma-aminobutyric acid receptor-associated protein partial        | custom          |
| 89822             | 2505           | Serine/arginine-rich splicing factor 4 partial                     | custom          |
| 90301             | 2507           | Hydroxysteroid dehydrogenase-like protein 2 partial                | custom          |
| NA                | 2508           | Translation initiation factor IF-2 mitochondrial partial           | custom          |
| NA                | 2509           | hypothetical protein X975 05876 partial                            | custom          |
| NA                | 2511           | Conserved oligomeric Golgi complex subunit 7 partial               | custom          |
| NA                | 2512           | Protein phosphatase 1B partial                                     | custom          |
| 90605             | 2513           | Nuclear cap-binding protein subunit 2 partial                      | custom          |
| NA                | 2515           | Dixin partial                                                      | custom          |
| 90618             | 2516           | Proliferation-associated protein 2G4 partial                       | custom          |
| NA                | 2518           | 4-hydroxybutyrate coenzyme A transferase partial                   | custom          |
| NA                | 2519           | Medium-chain specific acyl-CoA dehydrogenase mitochondrial partial | custom          |
| 89990             | 2522           | Rab GDP dissociation inhibitor beta partial                        | custom          |
| NA                | 2524           | Coiled-coil domain-containing protein 43 partial                   | custom          |
| 90107             | 2526           | Calreticulin partial                                               | custom          |

**Supplemental Table 3 – continued from previous page**

| <b>Arthropod Core ID</b> | <b>Spider Core ID</b> | <b>Putative Ortholog Description</b>                                            | <b>Target Database</b> |
|--------------------------|-----------------------|---------------------------------------------------------------------------------|------------------------|
| NA                       | 2528                  | hypothetical protein X975 16227 partial                                         | custom                 |
| NA                       | 2529                  | Protein lifeguard 2 partial                                                     | custom                 |
| NA                       | 2530                  | Eukaryotic translation initiation factor 4B partial                             | custom                 |
| 89707                    | 2532                  | Acetyl-CoA acetyltransferase A mitochondrial partial                            | custom                 |
| 90099                    | 2533                  | Dolichyl-diphosphooligosaccharide-protein glycosyltransferase subunit 1 partial | custom                 |
| NA                       | 2534                  | Squamous cell carcinoma antigen recognized by T-cells 3 partial                 | custom                 |
| 90343                    | 2535                  | putative isocitrate dehydrogenase [NAD] subunit beta mitochondrial partial      | custom                 |
| NA                       | 2537                  | Vascular endothelial growth factor A partial                                    | custom                 |
| NA                       | 2538                  | Krueppel-like factor 15 partial                                                 | custom                 |
| NA                       | 2539                  | NA                                                                              | nr                     |
| 90426                    | 2540                  | Polyadenylate-binding protein 1 partial                                         | custom                 |
| NA                       | 2541                  | Superoxide dismutase [Cu-Zn] partial                                            | custom                 |
| NA                       | 2545                  | Eukaryotic translation initiation factor 3 subunit L partial                    | custom                 |
| NA                       | 2547                  | DNA-directed RNA polymerase III subunit RPC5 partial                            | custom                 |
| NA                       | 2548                  | calcium-independent phospholipase A2 partial                                    | custom                 |
| NA                       | 2549                  | T-complex protein 1 subunit zeta partial                                        | custom                 |
| NA                       | 2550                  | Histone acetyltransferase KAT8 partial                                          | custom                 |

Supplemental Table 3 – continued from previous page

| Arthropod Core ID | Spider Core ID | Putative Ortholog Description                                     | Target Database |
|-------------------|----------------|-------------------------------------------------------------------|-----------------|
| NA                | 2551           | NA                                                                | nr              |
| 89657             | 2556           | UDP-glucose 6-dehydrogenase partial                               | custom          |
| NA                | 2557           | Transmembrane protein 68 partial                                  | custom          |
| NA                | 2558           | Vacuolar fusion protein MON1-like protein partial                 | custom          |
| NA                | 2559           | Heparan-alpha-glucosaminide N-acetyltransferase partial           | custom          |
| NA                | 2560           | Nucleoporin Nup43 partial                                         | custom          |
| 90542             | 2561           | Eukaryotic translation initiation factor 2D partial               | custom          |
| 90272             | 2562           | Beta-glucuronidase partial                                        | custom          |
| NA                | 2563           | CDK5 regulatory subunit-associated protein 1 partial              | custom          |
| NA                | 2565           | Dehydrogenase/reductase SDR family protein 7-like protein partial | custom          |
| NA                | 2568           | Coiled-coil domain-containing protein 50 partial                  | custom          |
| NA                | 2569           | Ribokinase partial                                                | custom          |
| NA                | 2570           | Geranylgeranyl transferase type-2 subunit alpha partial           | custom          |
| NA                | 2571           | Dimethyladenosine transferase 1 mitochondrial partial             | custom          |
| NA                | 2573           | PREDICTED: COMM domain-containing protein 5-like                  | nr              |
| NA                | 2575           | Peroxisomal carnitine O-octanoyltransferase partial               | custom          |
| NA                | 2576           | Programmed cell death protein 6 partial                           | custom          |

**Supplemental Table 3 – continued from previous page**

| <b>Arthropod Core ID</b> | <b>Spider Core ID</b> | <b>Putative Ortholog Description</b>                       | <b>Target Database</b> |
|--------------------------|-----------------------|------------------------------------------------------------|------------------------|
| NA                       | 2578                  | Calcium and integrin-binding protein 1 partial             | custom                 |
| NA                       | 2580                  | Rhombotin-1 partial                                        | custom                 |
| NA                       | 2581                  | Protein phosphatase 1K mitochondrial partial               | custom                 |
| NA                       | 2582                  | Protein GPR107 partial                                     | custom                 |
| 90479                    | 2583                  | RNA-binding protein pno1 partial                           | custom                 |
| NA                       | 2585                  | hypothetical protein X975 03921 partial                    | custom                 |
| NA                       | 2586                  | Ras-related protein Rab-7a partial                         | custom                 |
| NA                       | 2588                  | NGFI-A-binding protein-like protein partial                | custom                 |
| NA                       | 2590                  | Transcriptional enhancer factor TEF-1 partial              | custom                 |
| NA                       | 2591                  | Leukotriene A-4 hydrolase partial                          | custom                 |
| NA                       | 2593                  | Nicolin-1 partial                                          | custom                 |
| NA                       | 2594                  | Charged multivesicular body protein 1b partial             | custom                 |
| NA                       | 2597                  | hypothetical protein X975 02228 partial                    | custom                 |
| NA                       | 2598                  | PKHD domain-containing transmembrane protein partial       | custom                 |
| 90315                    | 2599                  | NEDD8-activating enzyme E1 regulatory subunit partial      | custom                 |
| NA                       | 2601                  | Hydroxyacid-oxoacid transhydrogenase mitochondrial partial | custom                 |
| NA                       | 2602                  | Gamma-aminobutyric acid type B receptor subunit 1 partial  | custom                 |
| NA                       | 2605                  | Neural cell adhesion molecule 1 partial                    | custom                 |

**Supplemental Table 3 – continued from previous page**

| <b>Arthropod Core ID</b> | <b>Spider Core ID</b> | <b>Putative Ortholog Description</b>               | <b>Target Database</b> |
|--------------------------|-----------------------|----------------------------------------------------|------------------------|
| NA                       | 2607                  | Anaphase-promoting complex subunit 5 partial       | custom                 |
| NA                       | 2611                  | Apoptosis-inducing factor 1 mitochondrial partial  | custom                 |
| NA                       | 2615                  | Methionine-tRNA ligase mitochondrial partial       | custom                 |
| NA                       | 2616                  | ATP-dependent RNA helicase DDX24 partial           | custom                 |
| NA                       | 2618                  | putative serine hydro-lase partial                 | custom                 |
| NA                       | 2619                  | Connectin partial                                  | custom                 |
| 90639                    | 2620                  | 3-hydroxyacyl-CoA dehydrogenase type-2 partial     | custom                 |
| NA                       | 2621                  | Centrosomal protein partial                        | custom                 |
| 90079                    | 2624                  | tRNA (cytosine(34)-C(5))-methyltransferase partial | custom                 |
| NA                       | 2626                  | Neuronal migration protein doublecortin partial    | custom                 |
| NA                       | 2627                  | Mitochondrial ornithine transporter 1 partial      | custom                 |
| 90223                    | 2628                  | E3 UFM1-protein ligase 1 partial                   | custom                 |
| NA                       | 2629                  | Golgin subfamily A member 5 partial                | custom                 |
| NA                       | 2631                  | hypothetical protein X975 04394 partial            | custom                 |
| NA                       | 2632                  | Mitochondrial ribonuclease P protein 3 partial     | custom                 |
| NA                       | 2633                  | hypothetical protein X975 10778 partial            | custom                 |
| 89774                    | 2634                  | Signal recognition particle protein partial        | custom                 |
| NA                       | 2635                  | hypothetical protein X975 17473 partial            | custom                 |

Supplemental Table 3 – continued from previous page

| Arthropod Core ID | Spider Core ID | Putative Ortholog Description                                                        | Target Database |
|-------------------|----------------|--------------------------------------------------------------------------------------|-----------------|
| 90008             | 2637           | Beta-ureidopropionase partial                                                        | custom          |
| NA                | 2638           | TIP41-like protein partial                                                           | custom          |
| NA                | 2644           | hypothetical protein X975 14917 partial                                              | custom          |
| 90571             | 2646           | Exocyst complex component 8 partial                                                  | custom          |
| NA                | 2649           | Hydroxyacyl-coenzyme A dehydrogenase mitochondrial partial                           | custom          |
| NA                | 2652           | WD repeat-containing protein 91 partial                                              | custom          |
| NA                | 2653           | putative palmitoyltransferase ZDHHC14 partial                                        | custom          |
| 89816             | 2654           | ATP-dependent RNA helicase DDX51 partial                                             | custom          |
| NA                | 2655           | hypothetical protein X975 07487 partial                                              | custom          |
| NA                | 2657           | Trafficking protein particle complex subunit 8 partial                               | custom          |
| NA                | 2660           | DCN1-like protein 1 partial                                                          | custom          |
| NA                | 2661           | Endoribonuclease Dcr-1 partial                                                       | custom          |
| NA                | 2662           | Dynactin subunit 4 partial                                                           | custom          |
| 89917             | 2663           | Phosphatidylinositol-45-bisphosphate 3-kinase catalytic subunit beta isoform partial | custom          |
| NA                | 2665           | Phosphatidylinositol-345-trisphosphate 3-phosphatase TPTE2 partial                   | custom          |
| NA                | 2666           | hypothetical protein X975 22847 partial                                              | custom          |
| NA                | 2668           | 4-aminobutyrate aminotransferase mitochondrial partial                               | custom          |

Supplemental Table 3 – continued from previous page

| Arthropod Core ID | Spider Core ID | Putative Ortholog Description                                  | Target Database |
|-------------------|----------------|----------------------------------------------------------------|-----------------|
| NA                | 2675           | Cleavage stimulation factor subunit 3 partial                  | custom          |
| NA                | 2678           | FUN14 domain-containing protein 1 partial                      | custom          |
| NA                | 2683           | Replication factor C subunit 1 partial                         | custom          |
| NA                | 2690           | Phosphoribosylformylglycinamidine synthase partial             | custom          |
| NA                | 2694           | Junctophilin-1 partial                                         | custom          |
| NA                | 2695           | Zinc finger protein 592 partial                                | custom          |
| NA                | 2696           | putative RNA-binding protein 19 partial                        | custom          |
| NA                | 2697           | 4-hydroxybenzoate polyprenyltransferase mitochondrial partial  | custom          |
| NA                | 2698           | Sentrin-specific protease 1 partial                            | custom          |
| NA                | 2700           | putative ATP-dependent RNA helicase DHX37 partial              | custom          |
| 90127             | 2701           | hypothetical protein X975 17968 partial                        | custom          |
| 90472             | 2702           | Heterogeneous nuclear ribonucleoprotein D-like protein partial | custom          |
| NA                | 2704           | putative E3 ubiquitin-protein ligase MGRN1 partial             | custom          |
| NA                | 2705           | GTP-binding protein Rheb-like protein partial                  | custom          |
| NA                | 2706           | Protein DEK partial                                            | custom          |
| NA                | 2707           | Cyclin-dependent kinase 8 partial                              | custom          |
| NA                | 2708           | Flavin reductase (NADPH) partial                               | custom          |
| NA                | 2709           | Glutathione S-transferase Mu 1 partial                         | custom          |
| NA                | 2710           | hypothetical protein X975 10107 partial                        | custom          |



**Supplemental Table 3 – continued from previous page**

| <b>Arthropod Core ID</b> | <b>Spider Core ID</b> | <b>Putative Ortholog Description</b>                                 | <b>Target Database</b> |
|--------------------------|-----------------------|----------------------------------------------------------------------|------------------------|
| 90481                    | 2711                  | NADH dehydrogenase [ubiquinone] flavoprotein 1 mitochondrial partial | custom                 |
| 89765                    | 2712                  | Protein OS-9 partial                                                 | custom                 |
| NA                       | 2713                  | Eukaryotic translation initiation factor 2 subunit 1 partial         | custom                 |
| NA                       | 2715                  | HIG1 domain family member 2A partial                                 | custom                 |
| 90145                    | 2717                  | 40S ribosomal protein S30 partial                                    | custom                 |
| NA                       | 2718                  | Mitochondrial-processing peptidase subunit beta partial              | custom                 |
| NA                       | 2720                  | Pseudouridine-5'-monophosphatase partial                             | custom                 |
| 90564                    | 2721                  | ATP-binding cassette sub-family F member 1 partial                   | custom                 |
| 90141                    | 2722                  | C-terminal-binding protein partial                                   | custom                 |
| 90638                    | 2723                  | Charged multivesicular body protein 4b partial                       | custom                 |
| NA                       | 2724                  | Glucose-6-phosphate translocase partial                              | custom                 |
| NA                       | 2725                  | Basigin partial                                                      | custom                 |
| NA                       | 2726                  | Ankyrin repeat domain-containing protein 13C partial                 | custom                 |
| NA                       | 2729                  | Muscle-specific protein 20 partial                                   | custom                 |
| NA                       | 2730                  | Myotubularin-related protein 2 partial                               | custom                 |
| NA                       | 2731                  | Alcohol dehydrogenase class-3 chain L partial                        | custom                 |
| 90601                    | 2733                  | Conserved oligomeric Golgi complex subunit 4 partial                 | custom                 |
| NA                       | 2735                  | COP9 signalosome complex subunit 3 partial                           | custom                 |
| NA                       | 2737                  | Nucleolar transcription factor 1-B partial                           | custom                 |

**Supplemental Table 3 – continued from previous page**

| <b>Arthropod Core ID</b> | <b>Spider Core ID</b> | <b>Putative Ortholog Description</b>                               | <b>Target Database</b> |
|--------------------------|-----------------------|--------------------------------------------------------------------|------------------------|
| NA                       | 2738                  | Leucine-rich repeat-containing protein 47 partial                  | custom                 |
| NA                       | 2739                  | Multidrug resistance-associated protein 1 partial                  | custom                 |
| NA                       | 2740                  | DNA-directed RNA polymerase II subunit RPB4 partial                | custom                 |
| 90022                    | 2741                  | Lipoyl synthase mitochondrial partial                              | custom                 |
| NA                       | 2743                  | 28S ribosomal protein S22 mitochondrial partial                    | custom                 |
| 89651                    | 2744                  | Beta-14-mannosyltransferase egh partial                            | custom                 |
| NA                       | 2746                  | Protein O-mannosyltransferase 2 partial                            | custom                 |
| 89802                    | 2748                  | Pre-mRNA-splicing factor syf2 partial                              | custom                 |
| NA                       | 2751                  | UBX domain-containing protein 1-A partial                          | custom                 |
| NA                       | 2752                  | CKLF-like MARVEL transmembrane domain-containing protein 4 partial | custom                 |
| NA                       | 2753                  | Tubulin polyglutamylase TTL4 partial                               | custom                 |
| NA                       | 2755                  | Cytochrome c oxidase assembly protein COX11 mitochondrial partial  | custom                 |
| NA                       | 2756                  | Protein MEF2BNB-like protein partial                               | custom                 |
| NA                       | 2757                  | Peptidyl-prolyl cis-trans isomerase FKBP2 partial                  | custom                 |
| NA                       | 2758                  | Carboxypeptidase A2 partial                                        | custom                 |
| NA                       | 2759                  | hypothetical protein X975 13772 partial                            | custom                 |
| NA                       | 2761                  | hypothetical protein X975 05727 partial                            | custom                 |
| NA                       | 2762                  | Death-associated protein 1 partial                                 | custom                 |

**Supplemental Table 3 – continued from previous page**

| <b>Arthropod Core ID</b> | <b>Spider Core ID</b> | <b>Putative Ortholog Description</b>                                             | <b>Target Database</b> |
|--------------------------|-----------------------|----------------------------------------------------------------------------------|------------------------|
| NA                       | 2764                  | hypothetical protein X975 22094 partial                                          | custom                 |
| NA                       | 2766                  | Developmentally-regulated GTP-binding protein 2 partial                          | custom                 |
| NA                       | 2768                  | hypothetical protein X975 03910 partial                                          | custom                 |
| 90178                    | 2769                  | Glyoxalase domain-containing protein 4 partial                                   | custom                 |
| NA                       | 2770                  | Methyltransferase-like protein 14 partial                                        | custom                 |
| 90054                    | 2771                  | Proliferating cell nuclear antigen partial                                       | custom                 |
| NA                       | 2773                  | Protein bunched class 2/F isoform partial                                        | custom                 |
| NA                       | 2774                  | Voltage-dependent anion-selective channel protein 2 partial                      | custom                 |
| NA                       | 2775                  | Alcohol dehydrogenase class-3 partial                                            | custom                 |
| NA                       | 2776                  | [3-methyl-2-oxobutanoate dehydrogenase [lipoamide]] kinase mitochondrial partial | custom                 |
| 89696                    | 2777                  | Mitochondrial-processing peptidase subunit beta partial                          | custom                 |
| NA                       | 2778                  | NA                                                                               | nr                     |
| NA                       | 2779                  | Hydroxysteroid dehydrogenase-like protein 1 partial                              | custom                 |
| NA                       | 2780                  | Ubiquitin-like protein ATG12 partial                                             | custom                 |
| 89717                    | 2781                  | SUMO-activating enzyme subunit 1 partial                                         | custom                 |
| NA                       | 2783                  | Mitochondrial import inner membrane translocase subunit TIM44 partial            | custom                 |
| NA                       | 2784                  | hypothetical protein X975 19443 partial                                          | custom                 |

**Supplemental Table 3 – continued from previous page**

| <b>Arthropod Core ID</b> | <b>Spider Core ID</b> | <b>Putative Ortholog Description</b>                                     | <b>Target Database</b> |
|--------------------------|-----------------------|--------------------------------------------------------------------------|------------------------|
| NA                       | 2785                  | Protein deadpan partial                                                  | custom                 |
| NA                       | 2786                  | Calponin-3 partial                                                       | custom                 |
| NA                       | 2787                  | Protein VPRBP partial                                                    | custom                 |
| NA                       | 2788                  | Ero1-like protein partial                                                | custom                 |
| 89956                    | 2792                  | T-complex protein 1 subunit gamma partial                                | custom                 |
| NA                       | 2793                  | Ubiquitin-conjugating enzyme E2 R2 partial                               | custom                 |
| NA                       | 2794                  | Calcyclin-binding protein partial                                        | custom                 |
| NA                       | 2795                  | RWD domain-containing protein 4 partial                                  | custom                 |
| NA                       | 2796                  | Zinc transporter ZIP1 partial                                            | custom                 |
| NA                       | 2797                  | Hydroxyacid oxidase 1 partial                                            | custom                 |
| NA                       | 2798                  | Serine-threonine kinase receptor-associated protein partial              | custom                 |
| NA                       | 2800                  | hypothetical protein X975 19628 partial                                  | custom                 |
| NA                       | 2801                  | Mesencephalic astrocyte-derived neurotrophic factor-like protein partial | custom                 |
| NA                       | 2802                  | Cytosolic non-specific dipeptidase partial                               | custom                 |
| NA                       | 2803                  | hypothetical protein X975 25821 partial                                  | custom                 |
| 90646                    | 2804                  | Cystathionine gamma-lyase partial                                        | custom                 |
| NA                       | 2806                  | Peptidyl-prolyl cis-trans isomerase B partial                            | custom                 |
| NA                       | 2808                  | Selenoprotein S partial                                                  | custom                 |

**Supplemental Table 3 – continued from previous page**

| <b>Arthropod Core ID</b> | <b>Spider Core ID</b> | <b>Putative Ortholog Description</b>                                                | <b>Target Database</b> |
|--------------------------|-----------------------|-------------------------------------------------------------------------------------|------------------------|
| NA                       | 2810                  | NADH dehydrogenase [ubiquinone] 1 alpha subcomplex subunit 10 mitochondrial partial | custom                 |
| NA                       | 2811                  | Glutaryl-CoA dehydrogenase mitochondrial partial                                    | custom                 |
| NA                       | 2812                  | hypothetical protein X975 12951 partial                                             | custom                 |
| 90506                    | 2813                  | Translocation protein SEC62 partial                                                 | custom                 |
| NA                       | 2814                  | Alpha-centractin partial                                                            | custom                 |
| NA                       | 2815                  | Dipeptidyl peptidase 1 partial                                                      | custom                 |
| NA                       | 2816                  | DnaJ-like protein subfamily A member 2 partial                                      | custom                 |
| NA                       | 2817                  | Y+L amino acid transporter 2 partial                                                | custom                 |
| NA                       | 2818                  | 2-oxoisovalerate dehydrogenase subunit alpha mitochondrial partial                  | custom                 |
| 90111                    | 2819                  | 26S protease regulatory subunit 6A partial                                          | custom                 |
| NA                       | 2820                  | Splicing factor 3B subunit 4 partial                                                | custom                 |
| NA                       | 2821                  | Secernin-2 partial                                                                  | custom                 |
| NA                       | 2822                  | hypothetical protein X975 00118 partial                                             | custom                 |
| NA                       | 2823                  | Bleomycin hydrolase partial                                                         | custom                 |
| NA                       | 2824                  | T-complex protein 1 subunit alpha partial                                           | custom                 |
| NA                       | 2825                  | Xaa-Pro dipeptidase partial                                                         | custom                 |
| NA                       | 2828                  | Tribbles-like protein partial                                                       | custom                 |
| NA                       | 2829                  | Carboxypeptidase E partial                                                          | custom                 |
| NA                       | 2830                  | Short-chain specific acyl-CoA dehydrogenase mitochondrial partial                   | custom                 |

**Supplemental Table 3 – continued from previous page**

| <b>Arthropod Core ID</b> | <b>Spider Core ID</b> | <b>Putative Ortholog Description</b>                         | <b>Target Database</b> |
|--------------------------|-----------------------|--------------------------------------------------------------|------------------------|
| NA                       | 2831                  | Leucine-rich repeat-containing protein 15 partial            | custom                 |
| NA                       | 2833                  | hypothetical protein X975 02652 partial                      | custom                 |
| 90182                    | 2837                  | Periodic tryptophan protein 1-like protein partial           | custom                 |
| NA                       | 2838                  | hypothetical protein X975 00948 partial                      | custom                 |
| NA                       | 2840                  | hypothetical protein X975 15601 partial                      | custom                 |
| NA                       | 2841                  | hypothetical protein X975 25326 partial                      | custom                 |
| NA                       | 2842                  | Ubiquitin carboxyl-terminal hydrolase 16 partial             | custom                 |
| NA                       | 2843                  | Serine/threonine-protein kinase PLK1 partial                 | custom                 |
| NA                       | 2844                  | Polycomb protein Suz12 partial                               | custom                 |
| NA                       | 2847                  | hypothetical protein X975 16220 partial                      | custom                 |
| NA                       | 2848                  | Ubiquitin-conjugating enzyme E2 W partial                    | custom                 |
| NA                       | 2850                  | Down syndrome critical region protein 3-like protein partial | custom                 |
| 90627                    | 2851                  | Short coiled-coil protein partial                            | custom                 |
| NA                       | 2852                  | Transmembrane channel-like protein 7 partial                 | custom                 |
| NA                       | 2853                  | Zinc finger CCHC domain-containing protein 4 partial         | custom                 |
| NA                       | 2855                  | RNA-binding protein NOB1 partial                             | custom                 |
| 90372                    | 2857                  | Ubiquitin carboxyl-terminal hydrolase BAP1 partial           | custom                 |
| NA                       | 2858                  | Acetyl-coenzyme A transporter 1 partial                      | custom                 |
| NA                       | 2859                  | Pyroglutamyl-peptidase 1 partial                             | custom                 |

Supplemental Table 3 – continued from previous page

| Arthropod Core ID | Spider Core ID | Putative Ortholog Description                                               | Target Database |
|-------------------|----------------|-----------------------------------------------------------------------------|-----------------|
| NA                | 2861           | Sec1 family domain-containing protein 1 partial                             | custom          |
| 90514             | 2862           | NADH dehydrogenase [ubiquinone] iron-sulfur protein 4 mitochondrial partial | custom          |
| NA                | 2863           | Arginyl-tRNA-protein transferase 1 partial                                  | custom          |
| NA                | 2864           | Stress-induced-phosphoprotein 1 partial                                     | custom          |
| NA                | 2865           | OClA domain-containing protein 1 partial                                    | custom          |
| NA                | 2866           | Carbohydrate sulfo-transferase 6 partial                                    | custom          |
| NA                | 2868           | Sestrin-3 partial                                                           | custom          |
| NA                | 2869           | 26S proteasome non-ATPase regulatory subunit 3 partial                      | custom          |
| NA                | 2870           | Bis(5'-nucleosyl)-tetraphosphatase symmetrical partial                      | custom          |
| 90197             | 2871           | Golgi phosphoprotein 3 partial                                              | custom          |
| NA                | 2876           | Acyl-CoA dehydrogenase family member 9 mitochondrial partial                | custom          |
| 90104             | 2878           | DNA-directed RNA polymerase III subunit RPC3 partial                        | custom          |
| NA                | 2879           | Negative elongation factor B partial                                        | custom          |
| NA                | 2880           | putative tRNA threonylcarbamoyladenosine biosynthesis protein osgep partial | custom          |
| NA                | 2881           | ADP-dependent glucokinase partial                                           | custom          |
| NA                | 2882           | Muskelin partial                                                            | custom          |
| NA                | 2885           | Guanine nucleotide-binding protein G(o) subunit alpha partial               | custom          |
| NA                | 2891           | Ribulose-phosphate 3-epimerase partial                                      | custom          |

**Supplemental Table 3 – continued from previous page**

| <b>Arthropod Core ID</b> | <b>Spider Core ID</b> | <b>Putative Ortholog Description</b>                        | <b>Target Database</b> |
|--------------------------|-----------------------|-------------------------------------------------------------|------------------------|
| NA                       | 2894                  | E3 ubiquitin-protein ligase Hakai partial                   | custom                 |
| NA                       | 2895                  | Protein zyg-11-like protein partial                         | custom                 |
| NA                       | 2897                  | Nicotinamide mononucleotide adenylyltransferase 1 partial   | custom                 |
| NA                       | 2898                  | Diphthamide biosynthesis protein 2 partial                  | custom                 |
| NA                       | 2899                  | hypothetical protein X975 23643 partial                     | custom                 |
| NA                       | 2900                  | DNA polymerase alpha subunit B partial                      | custom                 |
| NA                       | 2901                  | Sarcosine dehydrogenase mitochondrial partial               | custom                 |
| NA                       | 2902                  | N-alpha-acetyltransferase 15 NatA auxiliary subunit partial | custom                 |
| NA                       | 2903                  | Transcription factor 20 partial                             | custom                 |
| NA                       | 2904                  | Conserved oligomeric Golgi complex subunit 2 partial        | custom                 |
| NA                       | 2906                  | Xylulose kinase partial                                     | custom                 |
| NA                       | 2908                  | hypothetical protein X975 01820 partial                     | custom                 |
| NA                       | 2909                  | Protein salvador-like protein partial                       | custom                 |
| NA                       | 2910                  | Protein ced-11 partial                                      | custom                 |
| NA                       | 2914                  | hypothetical protein X975 20345 partial                     | custom                 |
| NA                       | 2915                  | Acylamino-acid-releasing enzyme partial                     | custom                 |
| NA                       | 2916                  | UDP-glucuronic acid decarboxylase 1 partial                 | custom                 |
| NA                       | 2919                  | hypothetical protein X975 04267 partial                     | custom                 |
| NA                       | 2920                  | ATP-dependent RNA helicase DDX54 partial                    | custom                 |



Supplemental Table 3 – continued from previous page

| Arthropod Core ID | Spider Core ID | Putative Ortholog Description                                     | Target Database |
|-------------------|----------------|-------------------------------------------------------------------|-----------------|
| NA                | 2922           | Glutamate-gated chloride channel partial                          | custom          |
| NA                | 2923           | Magnesium transporter NIPA2 partial                               | custom          |
| NA                | 2925           | DAZ-associated protein 2 partial                                  | custom          |
| NA                | 2926           | Mitochondrial ribonuclease P protein 1-like protein partial       | custom          |
| NA                | 2927           | Copper chaperone for superoxide dismutase partial                 | custom          |
| NA                | 2928           | RING finger and transmembrane domain-containing protein 2 partial | custom          |
| 90198             | 2929           | WD repeat-containing protein 36 partial                           | custom          |
| NA                | 2930           | Low density lipoprotein receptor adapter protein 1-B partial      | custom          |
| NA                | 2933           | Remodeling and spacing factor 1 partial                           | custom          |
| NA                | 2934           | Lys-63-specific deubiquitinase partial                            | custom          |
| NA                | 2936           | hypothetical protein X975 05388 partial                           | custom          |
| NA                | 2937           | Integrator complex subunit 11 partial                             | custom          |
| NA                | 2938           | WD repeat-containing protein 61 partial                           | custom          |
| NA                | 2939           | Ubiquitin-associated protein 1 partial                            | custom          |
| NA                | 2940           | PREDICTED: ubiquitin-conjugating enzyme E2-24 kDa-like            | nr              |
| NA                | 2941           | PDZ domain-containing protein GIPC1 partial                       | custom          |
| NA                | 2942           | Coiled-coil domain-containing protein 93 partial                  | custom          |

**Supplemental Table 3 – continued from previous page**

| <b>Arthropod Core ID</b> | <b>Spider Core ID</b> | <b>Putative Ortholog Description</b>                                | <b>Target Database</b> |
|--------------------------|-----------------------|---------------------------------------------------------------------|------------------------|
| NA                       | 2943                  | putative sodium-coupled neutral amino acid transporter 7 partial    | custom                 |
| NA                       | 2944                  | Tetratricopeptide repeat protein 5 partial                          | custom                 |
| NA                       | 2945                  | COP9 signalosome complex subunit 7a partial                         | custom                 |
| NA                       | 2946                  | Vacuolar fusion protein CCZ1-like protein partial                   | custom                 |
| NA                       | 2947                  | hypothetical protein X975 17695 partial                             | custom                 |
| NA                       | 2948                  | Platelet-activating factor acetylhydrolase partial                  | custom                 |
| NA                       | 2949                  | Epsin-2 partial                                                     | custom                 |
| NA                       | 2951                  | BRO1 domain-containing protein BROX partial                         | custom                 |
| NA                       | 2953                  | Exportin-T partial                                                  | custom                 |
| NA                       | 2955                  | Ubiquitin carboxyl-terminal hydrolase 20 partial                    | custom                 |
| NA                       | 2956                  | Vacuolar protein sorting-associated protein 33A partial             | custom                 |
| NA                       | 2957                  | CDK5 regulatory subunit-associated protein 1-like 1 partial         | custom                 |
| NA                       | 2959                  | Coiled-coil domain-containing protein 12 partial                    | custom                 |
| NA                       | 2961                  | F-box/LRR-repeat protein 4 partial                                  | custom                 |
| 90169                    | 2963                  | Cytosolic Fe-S cluster assembly factor NARFL partial                | custom                 |
| 89841                    | 2968                  | X-linked retinitis pigmentosa GTPase regulator-like protein partial | custom                 |
| NA                       | 2970                  | hypothetical protein X975 02246 partial                             | custom                 |
| NA                       | 2972                  | Dysbindin partial                                                   | custom                 |

**Supplemental Table 3 – continued from previous page**

| <b>Arthropod Core ID</b> | <b>Spider Core ID</b> | <b>Putative Ortholog Description</b>                    | <b>Target Database</b> |
|--------------------------|-----------------------|---------------------------------------------------------|------------------------|
| NA                       | 2973                  | Zinc finger MYM-type protein 4 partial                  | custom                 |
| NA                       | 2974                  | hypothetical protein X975 11700 partial                 | custom                 |
| NA                       | 2975                  | Nuclear migration protein nudC partial                  | custom                 |
| NA                       | 2977                  | Ras-related protein Rab-1D partial                      | custom                 |
| NA                       | 2978                  | Protein SAAL1 partial                                   | custom                 |
| NA                       | 2980                  | Ubiquinone biosynthesis monooxygenase COQ6 partial      | custom                 |
| NA                       | 2981                  | Beta-catenin-like protein 1 partial                     | custom                 |
| 90166                    | 2984                  | Beta-mannosidase partial                                | custom                 |
| NA                       | 2986                  | Peroxisomal membrane protein PMP34 partial              | custom                 |
| NA                       | 2988                  | Frizzled-4 partial                                      | custom                 |
| 90038                    | 2989                  | TBC1 domain family member 22B partial                   | custom                 |
| 90449                    | 2993                  | hypothetical protein X975 08773 partial                 | custom                 |
| NA                       | 2994                  | hypothetical protein X975 19804 partial                 | custom                 |
| NA                       | 2996                  | Decaprenyl-diphosphate synthase subunit 1 partial       | custom                 |
| NA                       | 3000                  | Negative elongation factor C/D partial                  | custom                 |
| 89900                    | 3007                  | Nuclear pore complex protein Nup93 partial              | custom                 |
| NA                       | 3013                  | hypothetical protein X975 21297 partial                 | custom                 |
| NA                       | 3026                  | Alpha-N-acetylglucosaminidase partial                   | custom                 |
| NA                       | 3028                  | Ornithine decarboxylase partial                         | custom                 |
| NA                       | 3035                  | hypothetical protein X975 24787 partial                 | custom                 |
| NA                       | 3037                  | Methyltransferase-like protein 17 mitochondrial partial | custom                 |

Supplemental Table 3 – continued from previous page

| Arthropod Core ID | Spider Core ID | Putative Ortholog Description                                     | Target Database |
|-------------------|----------------|-------------------------------------------------------------------|-----------------|
| NA                | 3038           | Single-stranded DNA-binding protein mitochondrial partial         | custom          |
| NA                | 3039           | Cleavage and polyadenylation specificity factor subunit 3 partial | custom          |
| NA                | 3041           | WD repeat-containing protein 74 partial                           | custom          |
| 90385             | 3044           | 39S ribosomal protein L40 mitochondrial partial                   | custom          |
| NA                | 3045           | 28S ribosomal protein S15 mitochondrial partial                   | custom          |
| NA                | 3047           | Transmembrane protein 183 partial                                 | custom          |
| NA                | 3049           | Charged multivesicular body protein 2a partial                    | custom          |
| 90090             | 3052           | Inositol-3-phosphate synthase 1-A partial                         | custom          |
| NA                | 3053           | Poly(ADP-ribose) glycohydrolase partial                           | custom          |
| NA                | 3054           | Nesprin-2 partial                                                 | custom          |
| NA                | 3055           | Methionine-tRNA ligase cytoplasmic partial                        | custom          |
| 90528             | 3056           | Protein arginine N-methyltransferase 5 partial                    | custom          |
| 90644             | 3058           | Paired amphipathic helix protein Sin3b partial                    | custom          |
| NA                | 3059           | UPF0661 TPR repeat-containing protein partial                     | custom          |
| 90538             | 3060           | Soluble calcium-activated nucleotidase 1 partial                  | custom          |
| NA                | 3061           | Cytochrome b-c1 complex subunit 2 mitochondrial partial           | custom          |
| NA                | 3062           | heat- and acid-stable phosphoprotein partial                      | custom          |

Supplemental Table 3 – continued from previous page

| Arthropod Core ID | Spider Core ID | Putative Ortholog Description                                             | Target Database |
|-------------------|----------------|---------------------------------------------------------------------------|-----------------|
| NA                | 3063           | Vesicle-associated membrane protein/synaptobrevin-binding protein partial | custom          |
| NA                | 3064           | NADH-cytochrome b5 reductase 2 partial                                    | custom          |
| NA                | 3066           | Peptidase M20 domain-containing protein 2 partial                         | custom          |
| NA                | 3067           | Ankyrin repeat domain-containing protein 13B partial                      | custom          |
| NA                | 3068           | Ras-related protein Ral-a partial                                         | custom          |
| NA                | 3069           | Phenylalanine-tRNA ligase beta subunit partial                            | custom          |
| NA                | 3071           | Peptidyl-tRNA hydrolase 2 mitochondrial partial                           | custom          |
| 90574             | 3072           | Cleavage stimulation factor subunit 2 partial                             | custom          |
| 89677             | 3073           | Actin-like protein 6A partial                                             | custom          |
| NA                | 3075           | Transcription initiation factor TFIID subunit 10 partial                  | custom          |
| 90515             | 3076           | 60S ribosomal protein L35 partial                                         | custom          |
| NA                | 3077           | Guanine nucleotide-binding protein subunit beta-2-like 1 partial          | custom          |
| NA                | 3078           | Carbonic anhydrase 1 partial                                              | custom          |
| NA                | 3079           | U5 small nuclear ribonucleoprotein partial                                | custom          |
| NA                | 3080           | Thioredoxin-related transmembrane protein 1 partial                       | custom          |
| NA                | 3083           | Importin subunit alpha-7 partial                                          | custom          |
| 89913             | 3084           | Membrane-associated progesterone receptor component 2 partial             | custom          |

**Supplemental Table 3 – continued from previous page**

| <b>Arthropod Core ID</b> | <b>Spider Core ID</b> | <b>Putative Ortholog Description</b>                                         | <b>Target Database</b> |
|--------------------------|-----------------------|------------------------------------------------------------------------------|------------------------|
| NA                       | 3085                  | DNA-directed RNA polymerase III subunit RPC7 partial                         | custom                 |
| NA                       | 3086                  | Tropomyosin partial                                                          | custom                 |
| NA                       | 3087                  | WASH complex subunit FAM21 partial                                           | custom                 |
| NA                       | 3090                  | hypothetical protein X975 08459 partial                                      | custom                 |
| 90299                    | 3092                  | Actin-related protein 6 partial                                              | custom                 |
| 90645                    | 3093                  | Multiple coagulation factor deficiency protein 2-like protein partial        | custom                 |
| NA                       | 3094                  | Pterin-4-alpha-carbinolamine dehydratase partial                             | custom                 |
| NA                       | 3095                  | Prefoldin subunit 3 partial                                                  | custom                 |
| NA                       | 3096                  | LDLR chaperone boca partial                                                  | custom                 |
| NA                       | 3097                  | Alpha-13-mannosylglycoprotein 2-beta-N-acetylglucosaminyltransferase partial | custom                 |
| NA                       | 3098                  | Translocon-associated protein subunit delta partial                          | custom                 |
| NA                       | 3099                  | Protein TMED8 partial                                                        | custom                 |
| NA                       | 3100                  | Ankyrin repeat family A protein 2 partial                                    | custom                 |
| NA                       | 3102                  | WD40 repeat-containing protein SMU1 partial                                  | custom                 |
| NA                       | 3103                  | Leukotriene A-4 hydrolase partial                                            | custom                 |
| 89786                    | 3104                  | Adenylate kinase 2 mitochondrial partial                                     | custom                 |
| NA                       | 3106                  | hypothetical protein X975 03439 partial                                      | custom                 |
| NA                       | 3107                  | Endoribonuclease Dcr-1 partial                                               | custom                 |
| NA                       | 3108                  | Pleiotropic regulator 1 partial                                              | custom                 |

**Supplemental Table 3 – continued from previous page**

| <b>Arthropod Core ID</b> | <b>Spider Core ID</b> | <b>Putative Ortholog Description</b>                                        | <b>Target Database</b> |
|--------------------------|-----------------------|-----------------------------------------------------------------------------|------------------------|
| NA                       | 3110                  | Actin-related protein 2/3 complex subunit 3 partial                         | custom                 |
| NA                       | 3111                  | Triosephosphate isomerase B partial                                         | custom                 |
| NA                       | 3112                  | Carbonic anhydrase 7 partial                                                | custom                 |
| NA                       | 3114                  | Alpha-aspartyl dipeptidase partial                                          | custom                 |
| 89695                    | 3115                  | Polyadenylate-binding protein 2 partial                                     | custom                 |
| 90321                    | 3117                  | NADH dehydrogenase [ubiquinone] iron-sulfur protein 8 mitochondrial partial | custom                 |
| NA                       | 3118                  | Charged multivesicular body protein 3 partial                               | custom                 |
| NA                       | 3120                  | Eukaryotic translation initiation factor 4H partial                         | custom                 |
| NA                       | 3121                  | Alpha-endosulfine partial                                                   | custom                 |
| NA                       | 3122                  | 17-beta-hydroxysteroid dehydrogenase type 6 partial                         | custom                 |
| NA                       | 3123                  | ATP synthase subunit b mitochondrial partial                                | custom                 |
| NA                       | 3124                  | Protein arginine N-methyltransferase 7 partial                              | custom                 |
| NA                       | 3125                  | Translocon-associated protein subunit alpha partial                         | custom                 |
| NA                       | 3126                  | General transcription factor IIF subunit 1 partial                          | custom                 |
| 90589                    | 3127                  | Cytochrome c-type heme lyase partial                                        | custom                 |
| 90015                    | 3128                  | NADH dehydrogenase [ubiquinone] iron-sulfur protein 2 mitochondrial partial | custom                 |
| NA                       | 3129                  | Secreted frizzled-related protein 5 partial                                 | custom                 |

**Supplemental Table 3 – continued from previous page**

| <b>Arthropod Core ID</b> | <b>Spider Core ID</b> | <b>Putative Ortholog Description</b>                       | <b>Target Database</b> |
|--------------------------|-----------------------|------------------------------------------------------------|------------------------|
| NA                       | 3130                  | Protein YIPF1 partial                                      | custom                 |
| NA                       | 3133                  | beta-galactoside-binding lectin partial                    | custom                 |
| NA                       | 3135                  | UDP-glucose 4-epimerase partial                            | custom                 |
| NA                       | 3136                  | Protein Skeletor isoforms B/C partial                      | custom                 |
| 89880                    | 3137                  | Tumor suppressor candidate 3 partial                       | custom                 |
| NA                       | 3140                  | Translin partial                                           | custom                 |
| NA                       | 3141                  | Aspartate aminotransferase cytoplasmic partial             | custom                 |
| NA                       | 3142                  | DNA replication licensing factor mcm2 partial              | custom                 |
| 90273                    | 3144                  | Zygotic DNA replication licensing factor mcm3 partial      | custom                 |
| NA                       | 3145                  | Inhibitor of Bruton tyrosine kinase partial                | custom                 |
| 89908                    | 3146                  | Phosphoglycerate kinase 1 partial                          | custom                 |
| NA                       | 3147                  | hypothetical protein X975 19489 partial                    | custom                 |
| NA                       | 3148                  | Transferrin partial                                        | custom                 |
| NA                       | 3149                  | putative 39S ribosomal protein L24 mitochondrial partial   | custom                 |
| 90226                    | 3150                  | Interleukin enhancer-binding factor 2-like protein partial | custom                 |
| NA                       | 3151                  | Retinol dehydrogenase 12 partial                           | custom                 |
| 89792                    | 3152                  | FACT complex subunit SSRP1 partial                         | custom                 |
| 89890                    | 3155                  | hypothetical protein X975 26470 partial                    | custom                 |
| NA                       | 3157                  | Ras-related protein Rab-5C partial                         | custom                 |
| NA                       | 3158                  | Flagellar radial spoke protein 3 partial                   | custom                 |
| NA                       | 3159                  | Neuferricin partial                                        | custom                 |
| NA                       | 3160                  | COMM domain-containing protein 8 partial                   | custom                 |



Supplemental Table 3 – continued from previous page

| Arthropod Core ID | Spider Core ID | Putative Ortholog Description                                                  | Target Database |
|-------------------|----------------|--------------------------------------------------------------------------------|-----------------|
| NA                | 3161           | Myeloid differentiation primary response protein MyD88 partial                 | custom          |
| NA                | 3163           | hypothetical protein X975 04393 partial                                        | custom          |
| 89976             | 3164           | WD repeat-containing protein 82 partial                                        | custom          |
| NA                | 3166           | Protein-L-isoaspartate O-methyltransferase domain-containing protein 2 partial | custom          |
| NA                | 3167           | Abhydrolase domain-containing protein 16A partial                              | custom          |
| NA                | 3168           | Krueppel-like factor 11 partial                                                | custom          |
| NA                | 3171           | Methylmalonyl-CoA epimerase mitochondrial partial                              | custom          |
| NA                | 3172           | hypothetical protein X975 19022 partial                                        | custom          |
| NA                | 3173           | ATP-binding domain-containing protein 4 partial                                | custom          |
| NA                | 3174           | hypothetical protein X975 10848 partial                                        | custom          |
| 90557             | 3176           | Angiogenic factor with G patch and FHA domains 1 partial                       | custom          |
| NA                | 3177           | Protein BCCIP-like protein partial                                             | custom          |
| NA                | 3178           | SPARC-related modular calcium-binding protein 1 partial                        | custom          |
| NA                | 3181           | Coiled-coil domain-containing protein 132 partial                              | custom          |
| NA                | 3182           | Interferon-related developmental regulator 1 partial                           | custom          |
| NA                | 3183           | Mortality factor 4-like protein 1 partial                                      | custom          |
| 90569             | 3184           | Mitotic checkpoint protein BUB3 partial                                        | custom          |

**Supplemental Table 3 – continued from previous page**

| <b>Arthropod Core ID</b> | <b>Spider Core ID</b> | <b>Putative Ortholog Description</b>                                     | <b>Target Database</b> |
|--------------------------|-----------------------|--------------------------------------------------------------------------|------------------------|
| NA                       | 3185                  | hypothetical protein X975 21997 partial                                  | custom                 |
| NA                       | 3186                  | NA                                                                       | nr                     |
| NA                       | 3187                  | hypothetical protein X975 10342 partial                                  | custom                 |
| NA                       | 3188                  | Tubulin-specific chaperone C partial                                     | custom                 |
| NA                       | 3190                  | Tyrosine-tRNA ligase cytoplasmic partial                                 | custom                 |
| NA                       | 3191                  | Microtubule-associated proteins 1A/1B light chain 3C partial             | custom                 |
| NA                       | 3192                  | Nuclear pore glycoprotein p62 partial                                    | custom                 |
| NA                       | 3196                  | PREDICTED: uncharacterized protein C14orf119 homolog                     | nr                     |
| NA                       | 3197                  | Kazal-type serine protease inhibitor domain-containing protein 1 partial | custom                 |
| NA                       | 3198                  | General transcription factor IIE subunit 1 partial                       | custom                 |
| NA                       | 3201                  | GPN-loop GTPase 1 partial                                                | custom                 |
| NA                       | 3202                  | EF-hand calcium-binding domain-containing protein 7 partial              | custom                 |
| NA                       | 3204                  | hypothetical protein X975 20481 partial                                  | custom                 |
| NA                       | 3205                  | putative glucose-6-phosphate 1-epimerase partial                         | custom                 |
| NA                       | 3206                  | Protein TSSC1 partial                                                    | custom                 |
| NA                       | 3207                  | Chaperone activity of bc1 complex-like mitochondrial partial             | custom                 |
| NA                       | 3208                  | Transmembrane protein 164 partial                                        | custom                 |
| NA                       | 3209                  | DNA-directed RNA polymerase I subunit RPA2 partial                       | custom                 |

Supplemental Table 3 – continued from previous page

| Arthropod Core ID | Spider Core ID | Putative Ortholog Description                                    | Target Database |
|-------------------|----------------|------------------------------------------------------------------|-----------------|
| NA                | 3211           | hypothetical protein X975 11667 partial                          | custom          |
| NA                | 3212           | hypothetical protein X975 08788 partial                          | custom          |
| NA                | 3213           | Cyclin-C partial                                                 | custom          |
| NA                | 3214           | PREDICTED: histone acetyltransferase KAT7-like                   | nr              |
| NA                | 3215           | Tricarboxylate transport protein mitochondrial partial           | custom          |
| 89945             | 3216           | NA                                                               | nr              |
| NA                | 3220           | putative 39S ribosomal protein L45 mitochondrial partial         | custom          |
| NA                | 3221           | Protein RRNAD1 partial                                           | custom          |
| 90310             | 3222           | UDP-glucose 4-epimerase partial                                  | custom          |
| NA                | 3223           | Motile sperm domain-containing protein 2 partial                 | custom          |
| 90261             | 3225           | Guanylate kinase partial                                         | custom          |
| NA                | 3226           | MFS-type transporter partial                                     | custom          |
| NA                | 3233           | Abhydrolase domain-containing protein 14A partial                | custom          |
| NA                | 3234           | Solute carrier family 35 member G1 partial                       | custom          |
| NA                | 3235           | Target of rapamycin complex subunit lst8 partial                 | custom          |
| NA                | 3237           | Abl interactor 1 partial                                         | custom          |
| NA                | 3239           | Methionine synthase reductase partial                            | custom          |
| NA                | 3240           | DNA methyltransferase 1-associated protein 1 partial             | custom          |
| NA                | 3241           | Protein bunched class 2/F isoform partial                        | custom          |
| NA                | 3244           | Mediator of RNA polymerase II transcription subunit 27-B partial | custom          |

**Supplemental Table 3 – continued from previous page**

| <b>Arthropod Core ID</b> | <b>Spider Core ID</b> | <b>Putative Ortholog Description</b>                                                                                 | <b>Target Database</b> |
|--------------------------|-----------------------|----------------------------------------------------------------------------------------------------------------------|------------------------|
| NA                       | 3245                  | Gamma-soluble NSF attachment protein partial                                                                         | custom                 |
| 89724                    | 3246                  | Dual specificity mitogen-activated protein kinase kinase 4 partial                                                   | custom                 |
| 89730                    | 3247                  | CDK5 regulatory subunit-associated protein 3 partial                                                                 | custom                 |
| NA                       | 3248                  | Hemiceitin-2 partial                                                                                                 | custom                 |
| NA                       | 3249                  | Thioredoxin-dependent peroxide reductase mitochondrial partial                                                       | custom                 |
| NA                       | 3250                  | WD repeat-containing protein 48 partial                                                                              | custom                 |
| NA                       | 3251                  | Ubiquitin-conjugating enzyme E2 1 partial                                                                            | custom                 |
| NA                       | 3254                  | hypothetical protein X975 11864 partial                                                                              | custom                 |
| NA                       | 3255                  | putative GTP-binding protein 6 partial                                                                               | custom                 |
| NA                       | 3258                  | SWI/SNF-related matrix-associated actin-dependent regulator of chromatin subfamily A containing DEAD/H box 1 partial | custom                 |
| NA                       | 3259                  | Glutamyl-tRNA(Gln) amidotransferase subunit B mitochondrial partial                                                  | custom                 |
| 89837                    | 3260                  | putative ATP-dependent RNA helicase DDX56 partial                                                                    | custom                 |
| 89697                    | 3261                  | DNA excision repair protein haywire partial                                                                          | custom                 |
| NA                       | 3262                  | Nuclear receptor coactivator 5 partial                                                                               | custom                 |
| NA                       | 3263                  | Retinitis pigmentosa 9 protein partial                                                                               | custom                 |

Supplemental Table 3 – continued from previous page

| Arthropod Core ID | Spider Core ID | Putative Ortholog Description                           | Target Database |
|-------------------|----------------|---------------------------------------------------------|-----------------|
| NA                | 3264           | U2 small nuclear ribonucleoprotein A partial            | custom          |
| NA                | 3265           | Tetratricopeptide repeat protein 8 partial              | custom          |
| NA                | 3266           | Serine/threonine-protein kinase 16 partial              | custom          |
| 90611             | 3267           | rRNA 2'-O-methyltransferase fibrillar partial           | custom          |
| NA                | 3269           | AP-3 complex subunit mu-1 partial                       | custom          |
| 89924             | 3270           | ADP-ribosylation factor-related protein 1 partial       | custom          |
| NA                | 3271           | hypothetical protein X975 19481 partial                 | custom          |
| NA                | 3272           | Coiled-coil domain-containing protein 134 partial       | custom          |
| NA                | 3273           | UBX domain-containing protein 7 partial                 | custom          |
| NA                | 3274           | Casein kinase II subunit beta partial                   | custom          |
| NA                | 3275           | Hepatocyte nuclear factor 4-beta partial                | custom          |
| NA                | 3276           | Nuclear pore complex protein Nup54 partial              | custom          |
| NA                | 3277           | Trafficking protein particle complex subunit 10 partial | custom          |
| NA                | 3279           | Protein SMG5 partial                                    | custom          |
| 90525             | 3280           | Disks large-like protein partial                        | custom          |
| NA                | 3281           | Stomatin-like protein 2 partial                         | custom          |
| NA                | 3282           | Tumor protein p63-regulated 1-like protein partial      | custom          |
| NA                | 3285           | Histone-lysine N-methyltransferase MLL3 partial         | custom          |
| NA                | 3286           | Surfeit locus protein 1 partial                         | custom          |

**Supplemental Table 3 – continued from previous page**

| <b>Arthropod Core ID</b> | <b>Spider Core ID</b> | <b>Putative Ortholog Description</b>                            | <b>Target Database</b> |
|--------------------------|-----------------------|-----------------------------------------------------------------|------------------------|
| NA                       | 3289                  | Cysteine and histidine-rich domain-containing protein 1 partial | custom                 |
| NA                       | 3290                  | TPPP family protein partial                                     | custom                 |
| NA                       | 3291                  | Geranylgeranyl transferase type-2 subunit beta partial          | custom                 |
| NA                       | 3292                  | putative phenylalanine-tRNA ligase mitochondrial partial        | custom                 |
| NA                       | 3293                  | Methyl-CpG-binding domain protein 2 partial                     | custom                 |
| NA                       | 3294                  | Dwarfin sma-2 partial                                           | custom                 |
| NA                       | 3297                  | Apoptosis inhibitor 5 partial                                   | custom                 |
| NA                       | 3299                  | TBC1 domain family member 5 partial                             | custom                 |
| NA                       | 3301                  | Zinc finger protein 474 partial                                 | custom                 |
| NA                       | 3303                  | Mitogen-activated protein kinase kinase kinase 7 partial        | custom                 |
| NA                       | 3304                  | Adipocyte plasma membrane-associated protein partial            | custom                 |
| 90367                    | 3307                  | ATP-binding cassette sub-family D member 3 partial              | custom                 |
| NA                       | 3309                  | DNA excision repair protein ERCC-6-like protein partial         | custom                 |
| NA                       | 3314                  | DnaJ-like protein sub-family C member 10 partial                | custom                 |
| NA                       | 3315                  | Protein tumorous imaginal disc mitochondrial partial            | custom                 |
| 90414                    | 3316                  | V-type proton ATPase proteolipid subunit partial                | custom                 |
| NA                       | 3317                  | Nucleolar complex protein 3-like protein partial                | custom                 |

**Supplemental Table 3 – continued from previous page**

| <b>Arthropod Core ID</b> | <b>Spider Core ID</b> | <b>Putative Ortholog Description</b>                       | <b>Target Database</b> |
|--------------------------|-----------------------|------------------------------------------------------------|------------------------|
| NA                       | 3318                  | Integrator complex subunit 7 partial                       | custom                 |
| NA                       | 3320                  | Thioredoxin partial                                        | custom                 |
| NA                       | 3321                  | Tyrosine-protein phosphatase non-receptor type 23 partial  | custom                 |
| NA                       | 3322                  | E3 ubiquitin-protein ligase TRIM37 partial                 | custom                 |
| NA                       | 3324                  | Tuberin partial                                            | custom                 |
| NA                       | 3326                  | Ubiquitin carboxyl-terminal hydrolase 34 partial           | custom                 |
| NA                       | 3330                  | hypothetical protein X975 25927 partial                    | custom                 |
| NA                       | 3331                  | putative ATP-dependent RNA helicase DDX52 partial          | custom                 |
| NA                       | 3344                  | 5-formyltetrahydrofolate cyclo-ligase partial              | custom                 |
| NA                       | 3349                  | Zinc finger protein GLI3 partial                           | custom                 |
| 90524                    | 3359                  | Histone H4 partial                                         | custom                 |
| NA                       | 3361                  | Cytochrome P450 3A24 partial                               | custom                 |
| NA                       | 3367                  | Low-density lipoprotein receptor-related protein 2 partial | custom                 |
| 90554                    | 3370                  | Adenylosuccinate lyase partial                             | custom                 |
| NA                       | 3371                  | Peptidyl-prolyl cis-trans isomerase B partial              | custom                 |
| 89955                    | 3372                  | Histone H2A partial                                        | custom                 |
| NA                       | 3373                  | Nuclear valosin-containing protein-like protein partial    | custom                 |
| 90609                    | 3374                  | elongation factor-1 gamma                                  | nr                     |
| NA                       | 3375                  | Epididymal secretory protein E1 partial                    | custom                 |
| NA                       | 3377                  | P2X purinoceptor 4 partial                                 | custom                 |
| NA                       | 3378                  | Galectin-4 partial                                         | custom                 |

**Supplemental Table 3 – continued from previous page**

| <b>Arthropod Core ID</b> | <b>Spider Core ID</b> | <b>Putative Ortholog Description</b>                         | <b>Target Database</b> |
|--------------------------|-----------------------|--------------------------------------------------------------|------------------------|
| NA                       | 3381                  | Vesicle-associated membrane protein 7 partial                | custom                 |
| NA                       | 3382                  | Aftiphilin partial                                           | custom                 |
| 89770                    | 3383                  | Fructose-bisphosphate aldolase partial                       | custom                 |
| 90620                    | 3385                  | Nascent polypeptide-associated complex subunit alpha partial | custom                 |
| NA                       | 3386                  | hypothetical protein X975 17660 partial                      | custom                 |
| NA                       | 3387                  | hypothetical protein X975 04935 partial                      | custom                 |
| NA                       | 3388                  | Ubiquitin-like protein 4A partial                            | custom                 |
| NA                       | 3390                  | hypothetical protein X975 23193 partial                      | custom                 |
| NA                       | 3391                  | CCA tRNA nucleotidyltransferase 1 mitochondrial partial      | custom                 |
| 90366                    | 3392                  | 39S ribosomal protein L12 mitochondrial partial              | custom                 |
| 90117                    | 3393                  | Mitochondrial folate transporter/carrier partial             | custom                 |
| NA                       | 3395                  | DDB1- and CUL4-associated factor 11 partial                  | custom                 |
| NA                       | 3396                  | Guanine nucleotide exchange factor MSS4 partial              | custom                 |
| 90108                    | 3397                  | Phosphoglucomutase partial                                   | custom                 |
| NA                       | 3398                  | putative RISC-loading complex subunit partial                | custom                 |
| NA                       | 3399                  | hypothetical protein X975 20588 partial                      | custom                 |
| NA                       | 3400                  | Protein FAM91A1 partial                                      | custom                 |
| NA                       | 3401                  | 7SK snRNA methylphosphate capping enzyme partial             | custom                 |



Supplemental Table 3 – continued from previous page

| Arthropod Core ID | Spider Core ID | Putative Ortholog Description                             | Target Database |
|-------------------|----------------|-----------------------------------------------------------|-----------------|
| 89798             | 3402           | Adaptin ear-binding coat-associated protein 1 partial     | custom          |
| NA                | 3404           | PREDICTED: EF-hand domain-containing protein D2-like      | nr              |
| 89805             | 3405           | Actin-related protein 3 partial                           | custom          |
| NA                | 3407           | Kunitz-type protease inhibitor 1 partial                  | custom          |
| NA                | 3409           | hypothetical protein X975 22960 partial                   | custom          |
| NA                | 3410           | Nuclear pore complex protein Nup155 partial               | custom          |
| NA                | 3411           | Protein asunder-like protein partial                      | custom          |
| NA                | 3412           | hypothetical protein X975 15341 partial                   | custom          |
| NA                | 3413           | Coiled-coil domain-containing protein 25 partial          | custom          |
| NA                | 3414           | Protein FAM100B partial                                   | custom          |
| NA                | 3415           | E3 ubiquitin-protein ligase TRIM33 partial                | custom          |
| NA                | 3417           | WD repeat-containing protein 55 partial                   | custom          |
| NA                | 3418           | PREDICTED: cAMP-responsive element-binding protein-like 2 | nr              |
| 90451             | 3419           | Proteasomal ubiquitin receptor ADRM1 partial              | custom          |
| NA                | 3421           | Trafficking protein particle complex subunit 4 partial    | custom          |
| NA                | 3422           | Enoyl-CoA hydratase mitochondrial partial                 | custom          |
| 90134             | 3423           | Pre-mRNA-processing factor 19 partial                     | custom          |
| NA                | 3424           | Prefoldin subunit 1 partial                               | custom          |

**Supplemental Table 3 – continued from previous page**

| <b>Arthropod Core ID</b> | <b>Spider Core ID</b> | <b>Putative Ortholog Description</b>                                 | <b>Target Database</b> |
|--------------------------|-----------------------|----------------------------------------------------------------------|------------------------|
| NA                       | 3425                  | putative deoxyribose-phosphate aldolase partial                      | custom                 |
| NA                       | 3427                  | hypothetical protein X975 17773 partial                              | custom                 |
| 89820                    | 3429                  | 40S ribosomal protein S6 partial                                     | custom                 |
| NA                       | 3430                  | Zinc finger matrin-type protein 2 partial                            | custom                 |
| NA                       | 3431                  | Polyglutamine-binding protein 1 partial                              | custom                 |
| NA                       | 3432                  | Protein dpy-30-like protein partial                                  | custom                 |
| NA                       | 3433                  | Transcription initiation factor TFIID subunit 8 partial              | custom                 |
| NA                       | 3434                  | hypothetical protein X975 24418 partial                              | custom                 |
| 90486                    | 3435                  | Twinfilin-1 partial                                                  | custom                 |
| NA                       | 3436                  | IST1-like protein partial                                            | custom                 |
| 90133                    | 3437                  | AP-1 complex subunit sigma-2 partial                                 | custom                 |
| NA                       | 3439                  | Trafficking protein particle complex subunit 3 partial               | custom                 |
| NA                       | 3440                  | Perilipin-5 partial                                                  | custom                 |
| NA                       | 3443                  | Mediator of RNA polymerase II transcription subunit 19 partial       | custom                 |
| NA                       | 3444                  | Transcription elongation factor B polypeptide 2 partial              | custom                 |
| NA                       | 3445                  | 3-ketodihydrospingosine reductase partial                            | custom                 |
| NA                       | 3446                  | Magnesium-dependent phosphatase 1 partial                            | custom                 |
| 89997                    | 3447                  | NADH dehydrogenase [ubiquinone] 1 alpha subcomplex subunit 8 partial | custom                 |
| NA                       | 3448                  | Density-regulated protein partial                                    | custom                 |

Supplemental Table 3 – continued from previous page

| Arthropod Core ID | Spider Core ID | Putative Ortholog Description                                    | Target Database |
|-------------------|----------------|------------------------------------------------------------------|-----------------|
| 89796             | 3449           | 60S ribosomal protein L5-A partial                               | custom          |
| NA                | 3451           | Mediator of RNA polymerase II transcription subunit 29 partial   | custom          |
| NA                | 3452           | Small nuclear ribonucleoprotein Sm D3 partial                    | custom          |
| NA                | 3455           | hypothetical protein X975 17159 partial                          | custom          |
| NA                | 3456           | mRNA turnover protein 4-like protein partial                     | custom          |
| NA                | 3457           | Solute carrier family 25 member 38 partial                       | custom          |
| NA                | 3458           | Heat shock protein beta-1 partial                                | custom          |
| 90407             | 3459           | Chloride intracellular channel exc-4 partial                     | custom          |
| NA                | 3460           | Mucin-5AC partial                                                | custom          |
| NA                | 3461           | Myosin regulatory light chain sqh partial                        | custom          |
| NA                | 3462           | Cytochrome c oxidase assembly protein COX15-like protein partial | custom          |
| NA                | 3463           | Tetratricopeptide repeat protein 35 partial                      | custom          |
| NA                | 3464           | Phosphate carrier protein mitochondrial partial                  | custom          |
| NA                | 3465           | hypothetical protein X975 12422 partial                          | custom          |
| NA                | 3467           | Na(+)/H(+) exchange regulatory cofactor NHE-RF2 partial          | custom          |
| 90146             | 3468           | Alpha-enolase partial                                            | custom          |
| 89862             | 3469           | hypothetical protein X975 24441 partial                          | custom          |
| NA                | 3470           | Sodium/potassium-transporting ATPase subunit beta-2 partial      | custom          |
| NA                | 3473           | 28S ribosomal protein S14 mitochondrial partial                  | custom          |

**Supplemental Table 3 – continued from previous page**

| <b>Arthropod Core ID</b> | <b>Spider Core ID</b> | <b>Putative Ortholog Description</b>                                   | <b>Target Database</b> |
|--------------------------|-----------------------|------------------------------------------------------------------------|------------------------|
| NA                       | 3474                  | Activating transcription factor of chaperone partial                   | custom                 |
| NA                       | 3475                  | Synaptosomal-associated protein 29 partial                             | custom                 |
| NA                       | 3476                  | Charged multivesicular body protein 1a partial                         | custom                 |
| 90577                    | 3477                  | Signal recognition particle receptor subunit alpha partial             | custom                 |
| NA                       | 3478                  | Glycine-tRNA ligase partial                                            | custom                 |
| 90160                    | 3479                  | DNA-directed RNA polymerases I II and III subunit RPABC1 partial       | custom                 |
| 89664                    | 3480                  | Protein SEC13-like protein partial                                     | custom                 |
| NA                       | 3481                  | Cytosol aminopeptidase partial                                         | custom                 |
| NA                       | 3483                  | Zinc-binding alcohol dehydrogenase domain-containing protein 2 partial | custom                 |
| 90271                    | 3485                  | Trans-23-enoyl-CoA reductase partial                                   | custom                 |
| NA                       | 3487                  | Sorting nexin-6 partial                                                | custom                 |
| NA                       | 3488                  | Protein Tob2 partial                                                   | custom                 |
| NA                       | 3490                  | Lysozyme 1 partial                                                     | custom                 |
| NA                       | 3491                  | N(G)N(G)-dimethylarginine dimethylaminohydrolase 1 partial             | custom                 |
| 90180                    | 3492                  | Hypothetical protein X975 00033 partial                                | custom                 |
| NA                       | 3493                  | hypothetical protein X975 02279 partial                                | custom                 |
| NA                       | 3494                  | hypothetical protein X975 00701 partial                                | custom                 |
| NA                       | 3495                  | Hemicentin-1 partial                                                   | custom                 |
| NA                       | 3496                  | Elongation of very long chain fatty acids protein partial              | custom                 |

**Supplemental Table 3 – continued from previous page**

| <b>Arthropod Core ID</b> | <b>Spider Core ID</b> | <b>Putative Ortholog Description</b>                              | <b>Target Database</b> |
|--------------------------|-----------------------|-------------------------------------------------------------------|------------------------|
| NA                       | 3497                  | SAGA-associated factor 29-like protein partial                    | custom                 |
| NA                       | 3498                  | Protein midA-like protein mitochondrial partial                   | custom                 |
| NA                       | 3500                  | Adenosine kinase partial                                          | custom                 |
| NA                       | 3502                  | Elongation factor G mitochondrial partial                         | custom                 |
| NA                       | 3504                  | GTP-binding protein partial                                       | custom                 |
| NA                       | 3505                  | Transformer-2 protein-like protein beta partial                   | custom                 |
| NA                       | 3507                  | Glycoprotein 3-alpha-L-fucosyltransferase A partial               | custom                 |
| NA                       | 3508                  | Inhibin beta E chain partial                                      | custom                 |
| NA                       | 3510                  | Ufm1-specific protease 2 partial                                  | custom                 |
| 90175                    | 3512                  | Protein disulfide-isomerase A3 partial                            | custom                 |
| NA                       | 3513                  | N-acetyl-D-glucosamine kinase partial                             | custom                 |
| 90413                    | 3514                  | Fructose-16-bisphosphatase 1 partial                              | custom                 |
| NA                       | 3516                  | hypothetical protein X975 14350 partial                           | custom                 |
| NA                       | 3517                  | hypothetical protein X975 04514 partial                           | custom                 |
| NA                       | 3518                  | hypothetical protein X975 07313 partial                           | custom                 |
| NA                       | 3519                  | Coiled-coil domain-containing protein 148 partial                 | custom                 |
| NA                       | 3521                  | Mitotic-spindle organizing protein 2A partial                     | custom                 |
| NA                       | 3522                  | Major facilitator superfamily domain-containing protein 4 partial | custom                 |

**Supplemental Table 3 – continued from previous page**

| <b>Arthropod Core ID</b> | <b>Spider Core ID</b> | <b>Putative Ortholog Description</b>                            | <b>Target Database</b> |
|--------------------------|-----------------------|-----------------------------------------------------------------|------------------------|
| 89782                    | 3523                  | General transcription factor 3C polypeptide 5 partial           | custom                 |
| NA                       | 3524                  | Cytidine deaminase partial                                      | custom                 |
| NA                       | 3527                  | E3 ubiquitin-protein ligase RFW3 partial                        | custom                 |
| NA                       | 3530                  | Ribosomal biogenesis protein LAS1L partial                      | custom                 |
| NA                       | 3531                  | C-1-tetrahydrofolate synthase cytoplasmic partial               | custom                 |
| NA                       | 3533                  | Protein phosphatase 1 regulatory subunit 3C-B partial           | custom                 |
| NA                       | 3534                  | Protein TBRG4 partial                                           | custom                 |
| NA                       | 3535                  | Mitochondrial ubiquitin ligase activator of nfkb 1 partial      | custom                 |
| NA                       | 3540                  | Maspardin partial                                               | custom                 |
| NA                       | 3541                  | LanC-like protein 3-like protein partial                        | custom                 |
| NA                       | 3542                  | Pseudouridylate synthase 7-like protein partial                 | custom                 |
| NA                       | 3543                  | Protein NDRG3 partial                                           | custom                 |
| NA                       | 3544                  | 28S ribosomal protein S27 mitochondrial partial                 | custom                 |
| NA                       | 3545                  | Isopentenyl-diphosphate Delta-isomerase 1 partial               | custom                 |
| NA                       | 3546                  | WD repeat domain phosphoinositide-interacting protein 4 partial | custom                 |
| NA                       | 3548                  | Hydroxyacylglutathione hydrolase mitochondrial partial          | custom                 |
| NA                       | 3552                  | U4/U6.U5 tri-snRNP-associated protein 1 partial                 | custom                 |
| NA                       | 3553                  | Regulator of G-protein signaling 20 partial                     | custom                 |

Supplemental Table 3 – continued from previous page

| Arthropod Core ID | Spider Core ID | Putative Ortholog Description                        | Target Database |
|-------------------|----------------|------------------------------------------------------|-----------------|
| NA                | 3554           | Protein PTCD3-like protein mitochondrial partial     | custom          |
| NA                | 3555           | hypothetical protein X975 04622 partial              | custom          |
| NA                | 3556           | Protein angel-like protein partial                   | custom          |
| 89777             | 3560           | V-type proton AT-Pase subunit C partial              | custom          |
| NA                | 3561           | Agmatinase mitochondrial partial                     | custom          |
| 90060             | 3563           | Conserved oligomeric Golgi complex subunit 3 partial | custom          |
| NA                | 3564           | Adenine phosphoribosyltransferase partial            | custom          |
| NA                | 3565           | hypothetical protein X975 23003 partial              | custom          |
| NA                | 3567           | Target of Myb protein 1 partial                      | custom          |
| NA                | 3568           | DIS3-like exonuclease 1 partial                      | custom          |
| NA                | 3572           | Transcriptional adapter 3 partial                    | custom          |
| NA                | 3573           | Serine/threonine-protein kinase pelle partial        | custom          |
| NA                | 3574           | Protein shuttle craft partial                        | custom          |
| NA                | 3575           | Baculoviral IAP repeat-containing protein 2 partial  | custom          |
| NA                | 3577           | Mimitin mitochondrial partial                        | custom          |
| NA                | 3578           | hypothetical protein X975 04962 partial              | custom          |
| NA                | 3579           | putative OPA3-like protein partial                   | custom          |
| NA                | 3580           | Retinoid-inducible serine carboxypeptidase partial   | custom          |
| NA                | 3581           | Folylpolyglutamate synthase mitochondrial partial    | custom          |

**Supplemental Table 3 – continued from previous page**

| <b>Arthropod Core ID</b> | <b>Spider Core ID</b> | <b>Putative Ortholog Description</b>                           | <b>Target Database</b> |
|--------------------------|-----------------------|----------------------------------------------------------------|------------------------|
| 89895                    | 3582                  | Histone acetyltransferase type B catalytic subunit partial     | custom                 |
| NA                       | 3583                  | Peroxisomal trans-2-enoyl-CoA reductase partial                | custom                 |
| NA                       | 3584                  | hypothetical protein X975 19829 partial                        | custom                 |
| NA                       | 3586                  | D-glucuronyl C5-epimerase partial                              | custom                 |
| NA                       | 3587                  | Ubiquitin-conjugating enzyme E2 C partial                      | custom                 |
| NA                       | 3589                  | Regulator of microtubule dynamics protein 1 partial            | custom                 |
| NA                       | 3590                  | Prenylcysteine oxidase partial                                 | custom                 |
| NA                       | 3591                  | Transmembrane protein 177 partial                              | custom                 |
| NA                       | 3593                  | Coiled-coil domain-containing protein 91 partial               | custom                 |
| NA                       | 3594                  | Zinc transporter 7 partial                                     | custom                 |
| NA                       | 3597                  | Spermine synthase partial                                      | custom                 |
| NA                       | 3598                  | Mediator of RNA polymerase II transcription subunit 30 partial | custom                 |
| NA                       | 3599                  | Protein PTHB1 partial                                          | custom                 |
| NA                       | 3600                  | Zinc finger HIT domain-containing protein 1 partial            | custom                 |
| NA                       | 3601                  | Dymeclin partial                                               | custom                 |
| NA                       | 3602                  | hypothetical protein X975 11969 partial                        | custom                 |
| NA                       | 3603                  | S-formylglutathione hydrolase partial                          | custom                 |
| NA                       | 3604                  | hypothetical protein X975 21314 partial                        | custom                 |
| NA                       | 3606                  | Alpha- and gamma-adaptin-binding protein p34 partial           | custom                 |



Supplemental Table 3 – continued from previous page

| Arthropod Core ID | Spider Core ID | Putative Ortholog Description                                    | Target Database |
|-------------------|----------------|------------------------------------------------------------------|-----------------|
| 90520             | 3607           | Calcium-binding mitochondrial carrier protein SCaMC-2-A partial  | custom          |
| NA                | 3608           | Glyoxylate reductase/hydroxypyruvate reductase partial           | custom          |
| NA                | 3610           | Leucine-rich repeat neuronal protein 2 partial                   | custom          |
| NA                | 3611           | Stomatin-like protein 1 partial                                  | custom          |
| NA                | 3612           | Lipoma-preferred partner partial                                 | custom          |
| NA                | 3613           | Kinesin-like protein KIF20A partial                              | custom          |
| 90199             | 3614           | Pre-mRNA-processing factor 17 partial                            | custom          |
| NA                | 3615           | Protein odr-4-like protein partial                               | custom          |
| NA                | 3625           | Transmembrane protein 39A partial                                | custom          |
| 90594             | 3627           | Transcriptional regulator ATRX partial                           | custom          |
| NA                | 3628           | Carboxypeptidase N subunit 2 partial                             | custom          |
| NA                | 3630           | Autophagy-related protein 101 partial                            | custom          |
| NA                | 3632           | GRIP and coiled-coil domain-containing protein 2 partial         | custom          |
| NA                | 3633           | hypothetical protein X975 01679 partial                          | custom          |
| NA                | 3637           | Nuclear distribution protein nudE-like protein partial           | custom          |
| NA                | 3640           | 5' exonuclease Apollo partial                                    | custom          |
| 89667             | 3642           | Serine/arginine-rich splicing factor 1 partial                   | custom          |
| NA                | 3643           | hypothetical protein X975 00727 partial                          | custom          |
| NA                | 3644           | putative 4-hydroxy-2-oxoglutarate aldolase mitochondrial partial | custom          |

**Supplemental Table 3 – continued from previous page**

| <b>Arthropod Core ID</b> | <b>Spider Core ID</b> | <b>Putative Ortholog Description</b>                               | <b>Target Database</b> |
|--------------------------|-----------------------|--------------------------------------------------------------------|------------------------|
| NA                       | 3645                  | decarboxylase, putative                                            | nr                     |
| NA                       | 3646                  | Protein kinase domain-containing protein cytoplasmic partial       | custom                 |
| NA                       | 3647                  | Small nuclear ribonucleoprotein-associated protein B partial       | custom                 |
| 89741                    | 3648                  | Polyribonucleotide 5'-hydroxyl-kinase Clp1 partial                 | custom                 |
| NA                       | 3649                  | Kelch domain-containing protein 2 partial                          | custom                 |
| NA                       | 3650                  | 39S ribosomal protein L3 mitochondrial partial                     | custom                 |
| 90327                    | 3652                  | Protein yippee-like 1 partial                                      | custom                 |
| NA                       | 3653                  | Gamma-glutamyl hydrolase partial                                   | custom                 |
| NA                       | 3656                  | mTERF domain-containing protein 1 mitochondrial partial            | custom                 |
| NA                       | 3657                  | DNA mismatch repair protein Mlh1 partial                           | custom                 |
| 90531                    | 3658                  | Suppressor of G2 allele of SKP1-like protein partial               | custom                 |
| NA                       | 3659                  | Zinc finger CCCH domain-containing protein 15-like protein partial | custom                 |
| NA                       | 3660                  | hypothetical protein X975 24750 partial                            | custom                 |
| NA                       | 3662                  | Structural maintenance of chromosomes protein 3 partial            | custom                 |
| NA                       | 3665                  | DNA polymerase kappa partial                                       | custom                 |
| NA                       | 3666                  | Clotting factor B partial                                          | custom                 |

**Supplemental Table 3 – continued from previous page**

| <b>Arthropod Core ID</b> | <b>Spider Core ID</b> | <b>Putative Ortholog Description</b>                             | <b>Target Database</b> |
|--------------------------|-----------------------|------------------------------------------------------------------|------------------------|
| NA                       | 3667                  | DNA-directed RNA polymerases I II and III subunit RPABC3 partial | custom                 |
| NA                       | 3668                  | E3 ubiquitin-protein ligase Topor partial                        | custom                 |
| NA                       | 3670                  | Enhancer of mRNA-decapping protein 3 partial                     | custom                 |
| NA                       | 3672                  | Thymidylate kinase partial                                       | custom                 |
| NA                       | 3673                  | 60S ribosomal export protein NMD3 partial                        | custom                 |
| NA                       | 3675                  | Tetratricopeptide repeat protein 21B partial                     | custom                 |
| NA                       | 3677                  | Tudor domain-containing protein 3 partial                        | custom                 |
| NA                       | 3678                  | Tetratricopeptide repeat protein 19 mitochondrial partial        | custom                 |
| NA                       | 3679                  | Transmembrane protein 165 partial                                | custom                 |
| NA                       | 3681                  | Calcipressin-3 partial                                           | custom                 |
| NA                       | 3684                  | WD repeat-containing protein 70 partial                          | custom                 |
| NA                       | 3685                  | Transcription initiation factor TFIID subunit 6 partial          | custom                 |
| NA                       | 3688                  | Serine/threonine-protein kinase 11-interacting protein partial   | custom                 |
| NA                       | 3691                  | Pre-mRNA-splicing factor 18 partial                              | custom                 |
| NA                       | 3692                  | THO complex subunit 5-like protein partial                       | custom                 |
| 90143                    | 3695                  | Zinc finger protein 598 partial                                  | custom                 |
| NA                       | 3698                  | hypothetical protein X975 12731 partial                          | custom                 |
| NA                       | 3700                  | putative E3 ubiquitin-protein ligase RNF144A partial             | custom                 |

**Supplemental Table 3 – continued from previous page**

| <b>Arthropod Core ID</b> | <b>Spider Core ID</b> | <b>Putative Ortholog Description</b>                                                  | <b>Target Database</b> |
|--------------------------|-----------------------|---------------------------------------------------------------------------------------|------------------------|
| NA                       | 3701                  | GTPase Era mitochondrial partial                                                      | custom                 |
| NA                       | 3703                  | hypothetical protein X975 04328 partial                                               | custom                 |
| NA                       | 3704                  | Beclin 1-associated autophagy-related key regulator partial                           | custom                 |
| NA                       | 3706                  | PREDICTED: ataxin-7-like protein 3                                                    | nr                     |
| 90349                    | 3709                  | Nucleolar GTP-binding protein 1 partial                                               | custom                 |
| NA                       | 3710                  | L-gulonolactone oxidase partial                                                       | custom                 |
| 90140                    | 3712                  | U2 small nuclear ribonucleoprotein auxiliary factor subunit-related protein 1 partial | custom                 |
| 90543                    | 3713                  | Charged multivesicular body protein 6 partial                                         | custom                 |
| 90049                    | 3715                  | NEDD8-activating enzyme E1 catalytic subunit partial                                  | custom                 |
| 90298                    | 3716                  | Leucine carboxyl methyltransferase 1 partial                                          | custom                 |
| NA                       | 3717                  | hypothetical protein X975 12954 partial                                               | custom                 |
| NA                       | 3718                  | Inositol monophosphatase 3 partial                                                    | custom                 |
| NA                       | 3719                  | Max-like protein X partial                                                            | custom                 |
| NA                       | 3722                  | Protein Mo25 partial                                                                  | custom                 |
| NA                       | 3723                  | hypothetical protein X975 16963 partial                                               | custom                 |
| NA                       | 3724                  | Protein phosphatase methylesterase 1 partial                                          | custom                 |
| NA                       | 3725                  | Vacuolar protein sorting-associated protein 28-like protein partial                   | custom                 |
| NA                       | 3726                  | Zinc finger protein-like 1 partial                                                    | custom                 |
| NA                       | 3727                  | hypothetical protein X975 09423 partial                                               | custom                 |

**Supplemental Table 3 – continued from previous page**

| <b>Arthropod Core ID</b> | <b>Spider Core ID</b> | <b>Putative Ortholog Description</b>                            | <b>Target Database</b> |
|--------------------------|-----------------------|-----------------------------------------------------------------|------------------------|
| NA                       | 3729                  | ER degradation-enhancing alpha-mannosidase-like 1 partial       | custom                 |
| NA                       | 3730                  | Programmed cell death protein 10 partial                        | custom                 |
| NA                       | 3731                  | Protein fem-1-like protein partial                              | custom                 |
| NA                       | 3732                  | Zinc transporter ZIP4 partial                                   | custom                 |
| NA                       | 3733                  | Hippocampus abundant transcript 1 protein partial               | custom                 |
| 89942                    | 3735                  | ADP-ribosylation factor-like protein 8B-A partial               | custom                 |
| 89766                    | 3737                  | WD repeat domain phosphoinositide-interacting protein 3 partial | custom                 |
| NA                       | 3739                  | Hypothetical protein arginine N-methyltransferase 10 partial    | custom                 |
| NA                       | 3740                  | Protein FAM164C partial                                         | custom                 |
| NA                       | 3744                  | hypothetical protein X975 13169 partial                         | custom                 |
| NA                       | 3745                  | Sec1 family domain-containing protein 2 partial                 | custom                 |
| 90334                    | 3746                  | C2 domain-containing protein 2 partial                          | custom                 |
| NA                       | 3747                  | Translin-associated protein X partial                           | custom                 |
| NA                       | 3749                  | Protein ELYS partial                                            | custom                 |
| NA                       | 3751                  | Periodic tryptophan protein 2-like protein partial              | custom                 |
| NA                       | 3753                  | DnaJ-like protein sub-family C member 22 partial                | custom                 |
| NA                       | 3755                  | Calcineurin subunit B type 2 partial                            | custom                 |

**Supplemental Table 3 – continued from previous page**

| <b>Arthropod Core ID</b> | <b>Spider Core ID</b> | <b>Putative Ortholog Description</b>                                | <b>Target Database</b> |
|--------------------------|-----------------------|---------------------------------------------------------------------|------------------------|
| 90555                    | 3756                  | DnaJ-like protein sub-family B member 14 partial                    | custom                 |
| NA                       | 3757                  | Fizzy-related protein-like protein partial                          | custom                 |
| NA                       | 3759                  | E3 ubiquitin-protein ligase RBBP6 partial                           | custom                 |
| NA                       | 3760                  | NA                                                                  | nr                     |
| NA                       | 3771                  | Regulation of nuclear pre-mRNA domain-containing protein 1A partial | custom                 |
| NA                       | 3776                  | Acylglycerol kinase mitochondrial partial                           | custom                 |
| 90066                    | 3785                  | GDP-fucose protein O-fucosyltransferase 1 partial                   | custom                 |
| NA                       | 3795                  | Exosome complex component RRP4 partial                              | custom                 |
| NA                       | 3796                  | DNA ligase 1 partial                                                | custom                 |
| NA                       | 3801                  | Zinc finger protein 207 partial                                     | custom                 |
| 90153                    | 3803                  | RNA-binding protein 5 partial                                       | custom                 |
| NA                       | 3805                  | hypothetical protein X975 08217 partial                             | custom                 |
| NA                       | 3806                  | Voltage-dependent L-type calcium channel subunit beta-2 partial     | custom                 |
| 90316                    | 3807                  | Mediator of RNA polymerase II transcription subunit 18 partial      | custom                 |
| NA                       | 3808                  | Short-chain dehydrogenase/reductase family 42E member 1 partial     | custom                 |
| NA                       | 3809                  | Coiled-coil domain-containing protein 97 partial                    | custom                 |
| NA                       | 3810                  | HD domain-containing protein 2 partial                              | custom                 |
| NA                       | 3811                  | Protein regulator of cytokinesis 1 partial                          | custom                 |
| NA                       | 3812                  | Calcium-binding protein E63-1 partial                               | custom                 |

Supplemental Table 3 – continued from previous page

| Arthropod Core ID | Spider Core ID | Putative Ortholog Description                                   | Target Database |
|-------------------|----------------|-----------------------------------------------------------------|-----------------|
| NA                | 3813           | Eukaryotic translation initiation factor 3 subunit J partial    | custom          |
| NA                | 3814           | Cyclin-dependent kinase 17 partial                              | custom          |
| NA                | 3816           | WD and tetratricopeptide repeats protein 1 partial              | custom          |
| 89700             | 3818           | V-type proton ATPase subunit E partial                          | custom          |
| NA                | 3819           | Peripheral plasma membrane protein CASK partial                 | custom          |
| NA                | 3820           | Natterin-4 partial                                              | custom          |
| NA                | 3821           | Deformed epidermal autoregulatory factor 1-like protein partial | custom          |
| NA                | 3823           | putative cytochrome P450 49a1 partial                           | custom          |
| NA                | 3825           | E3 ubiquitin-protein ligase RNF115 partial                      | custom          |
| 90374             | 3826           | Heterogeneous nuclear ribonucleoprotein 87F partial             | custom          |
| NA                | 3828           | Protein max partial                                             | custom          |
| 90404             | 3829           | hypothetical protein X975 03204 partial                         | custom          |
| NA                | 3830           | Peptidyl-tRNA hydrolase ICT1 mitochondrial partial              | custom          |
| NA                | 3831           | Adipocyte plasma membrane-associated protein partial            | custom          |
| NA                | 3832           | Ubiquitin carboxyl-terminal hydrolase isozyme L3 partial        | custom          |
| 90415             | 3833           | 40S ribosomal protein S12 partial                               | custom          |
| NA                | 3834           | Microtubule-associated protein Jupiter partial                  | custom          |
| NA                | 3835           | Poly(A) RNA polymerase gld-2-like protein partial               | custom          |

Supplemental Table 3 – continued from previous page

| Arthropod Core ID | Spider Core ID | Putative Ortholog Description                                          | Target Database |
|-------------------|----------------|------------------------------------------------------------------------|-----------------|
| 89973             | 3837           | Transmembrane emp24 domain-containing protein bai partial              | custom          |
| NA                | 3838           | Endoplasmic reticulum-Golgi intermediate compartment protein 2 partial | custom          |
| NA                | 3839           | Dipeptidyl peptidase 2 partial                                         | custom          |
| NA                | 3840           | Serine/threonine-protein phosphatase 4 catalytic subunit partial       | custom          |
| NA                | 3841           | N-acetylneuraminatase lyase                                            | nr              |
| NA                | 3842           | Superoxide dismutase [Cu-Zn] partial                                   | custom          |
| NA                | 3843           | cAMP-regulated phosphoprotein 21 partial                               | custom          |
| NA                | 3844           | putative leucine-tRNA ligase mitochondrial partial                     | custom          |
| NA                | 3845           | Translocator protein partial                                           | custom          |
| NA                | 3846           | Inosine-uridine preferring nucleoside hydrolase partial                | custom          |
| NA                | 3847           | hypothetical protein X975 22772 partial                                | custom          |
| NA                | 3848           | Set1/Ash2 histone methyltransferase complex subunit ASH2 partial       | custom          |
| NA                | 3849           | Ring canal kelch-like protein partial                                  | custom          |
| NA                | 3851           | NF-kappa-B inhibitor-interacting Ras-like protein 2 partial            | custom          |
| NA                | 3852           | Protein amnionless partial                                             | custom          |
| NA                | 3853           | High mobility group protein 20A partial                                | custom          |
| NA                | 3854           | Thioredoxin mitochondrial partial                                      | custom          |



**Supplemental Table 3 – continued from previous page**

| <b>Arthropod Core ID</b> | <b>Spider Core ID</b> | <b>Putative Ortholog Description</b>                                     | <b>Target Database</b> |
|--------------------------|-----------------------|--------------------------------------------------------------------------|------------------------|
| NA                       | 3856                  | Dihydrofolate reductase partial                                          | custom                 |
| NA                       | 3857                  | AN1-type zinc finger protein 2B partial                                  | custom                 |
| NA                       | 3858                  | Glutaredoxin-3 partial                                                   | custom                 |
| NA                       | 3859                  | Flap endonuclease 1 partial                                              | custom                 |
| NA                       | 3863                  | Transcription factor IIIA partial                                        | custom                 |
| 90441                    | 3865                  | 40S ribosomal protein S3a partial                                        | custom                 |
| NA                       | 3867                  | Zinc finger FYVE domain-containing protein 19 partial                    | custom                 |
| NA                       | 3869                  | Ras-related and estrogen-regulated growth inhibitor-like protein partial | custom                 |
| NA                       | 3870                  | tRNA-splicing endonuclease subunit Sen34 partial                         | custom                 |
| NA                       | 3871                  | Soma ferritin partial                                                    | custom                 |
| NA                       | 3873                  | U7 snRNA-associated Sm-like protein LSm10 partial                        | custom                 |
| NA                       | 3874                  | Isochorismatase domain-containing protein 2 mitochondrial partial        | custom                 |
| NA                       | 3875                  | Transcription initiation factor TFIID subunit 9B partial                 | custom                 |
| NA                       | 3876                  | Synaptophysin-like protein 2 partial                                     | custom                 |
| NA                       | 3878                  | Transmembrane protein 130 partial                                        | custom                 |
| NA                       | 3879                  | Signal peptidase complex subunit 3 partial                               | custom                 |
| NA                       | 3880                  | Poly(A)-specific ribonuclease PARN partial                               | custom                 |
| NA                       | 3881                  | Proteasome subunit alpha type-4 partial                                  | custom                 |
| NA                       | 3882                  | Ras-related C3 botulinum toxin substrate 1 partial                       | custom                 |

**Supplemental Table 3 – continued from previous page**

| <b>Arthropod Core ID</b> | <b>Spider Core ID</b> | <b>Putative Ortholog Description</b>                                                  | <b>Target Database</b> |
|--------------------------|-----------------------|---------------------------------------------------------------------------------------|------------------------|
| NA                       | 3883                  | Protein twisted gas-trulation partial                                                 | custom                 |
| NA                       | 3886                  | Purine nucleoside phosphorylase partial                                               | custom                 |
| NA                       | 3887                  | Eukaryotic translation initiation factor 3 subunit K partial                          | custom                 |
| NA                       | 3888                  | hypothetical protein X975 04362 partial                                               | custom                 |
| NA                       | 3889                  | hypothetical protein X975 23931 partial                                               | custom                 |
| 90379                    | 3890                  | hypothetical protein X975 20185 partial                                               | custom                 |
| NA                       | 3891                  | Myosin regulatory light chain 2 partial                                               | custom                 |
| NA                       | 3892                  | Reticulocalbin-2 partial                                                              | custom                 |
| 90371                    | 3893                  | Glucosamine-6-phosphate isomerase 2 partial                                           | custom                 |
| NA                       | 3894                  | Ubiquitin-conjugating enzyme E2 Z partial                                             | custom                 |
| NA                       | 3895                  | Mitochondrial import inner membrane translocase subunit Tim23 partial                 | custom                 |
| NA                       | 3896                  | Alkyldihydroxyacetonephosphate synthase peroxisomal partial                           | custom                 |
| NA                       | 3897                  | Laminin subunit alpha-2 partial                                                       | custom                 |
| NA                       | 3898                  | Lissencephaly-1-like protein partial                                                  | custom                 |
| NA                       | 3901                  | Coiled-coil-helix-coiled-coil-helix domain-containing protein 3 mitochondrial partial | custom                 |
| 89703                    | 3902                  | 40S ribosomal protein S13 partial                                                     | custom                 |
| 89702                    | 3903                  | NADH dehydrogenase [ubiquinone] iron-sulfur protein 7 mitochondrial partial           | custom                 |
| 90340                    | 3904                  | 60S ribosomal protein L4 partial                                                      | custom                 |

**Supplemental Table 3 – continued from previous page**

| <b>Arthropod Core ID</b> | <b>Spider Core ID</b> | <b>Putative Ortholog Description</b>                                          | <b>Target Database</b> |
|--------------------------|-----------------------|-------------------------------------------------------------------------------|------------------------|
| NA                       | 3905                  | PREDICTED: dna J homolog subfamily C member 24                                | nr                     |
| NA                       | 3906                  | Potassium channel subfamily K member 18 partial                               | custom                 |
| 90381                    | 3907                  | Myotrophin partial                                                            | custom                 |
| 89984                    | 3908                  | DnaJ-like protein subfamily C member 9 partial                                | custom                 |
| NA                       | 3909                  | Surfeit locus protein 6-like protein partial                                  | custom                 |
| NA                       | 3910                  | CD63 antigen partial                                                          | custom                 |
| NA                       | 3911                  | Zinc finger protein 99 partial                                                | custom                 |
| NA                       | 3912                  | High mobility group protein DSP1 partial                                      | custom                 |
| NA                       | 3913                  | Glutaminyl-peptide cyclotransferase partial                                   | custom                 |
| 90328                    | 3914                  | GrpE-like protein mitochondrial partial                                       | custom                 |
| NA                       | 3917                  | Cyclin-D1-binding protein 1-like protein partial                              | custom                 |
| 90312                    | 3918                  | heat shock protein mitochondrial partial                                      | custom                 |
| NA                       | 3919                  | hypothetical protein X975 06671 partial                                       | custom                 |
| NA                       | 3920                  | Cytochrome c1 heme protein mitochondrial partial                              | custom                 |
| NA                       | 3922                  | Aminoacyl tRNA synthase complex-interacting multifunctional protein 1 partial | custom                 |
| NA                       | 3923                  | Beta-sarcoglycan partial                                                      | custom                 |
| 89969                    | 3924                  | ATP synthase subunit alpha mitochondrial partial                              | custom                 |
| 90454                    | 3925                  | Protein CWC15-like protein partial                                            | custom                 |
| 90314                    | 3926                  | Proteasome subunit alpha type-1 partial                                       | custom                 |
| NA                       | 3928                  | hypothetical protein X975 09269 partial                                       | custom                 |

Supplemental Table 3 – continued from previous page

| Arthropod Core ID | Spider Core ID | Putative Ortholog Description                                                     | Target Database |
|-------------------|----------------|-----------------------------------------------------------------------------------|-----------------|
| NA                | 3929           | KH domain-containing RNA-binding signal transduction-associated protein 3 partial | custom          |
| NA                | 3930           | Peroxiredoxin-4 partial                                                           | custom          |
| NA                | 3931           | hypothetical protein X975 10684 partial                                           | custom          |
| 90262             | 3932           | Dynactin subunit 2-A partial                                                      | custom          |
| NA                | 3933           | Estradiol 17-beta-dehydrogenase 12 partial                                        | custom          |
| NA                | 3935           | Serine/arginine-rich splicing factor 4 partial                                    | custom          |
| 89768             | 3936           | Coiled-coil domain-containing protein 47 partial                                  | custom          |
| 90351             | 3939           | Ubiquitin carboxyl-terminal hydrolase 14 partial                                  | custom          |
| 89691             | 3940           | hypothetical protein X975 22147 partial                                           | custom          |
| NA                | 3941           | Delta(35)-Delta(24)-dienoyl-CoA isomerase mitochondrial partial                   | custom          |
| 90437             | 3942           | Clathrin light chain A partial                                                    | custom          |
| 90570             | 3946           | Fumarylacetoacetase partial                                                       | custom          |
| NA                | 3947           | Protein charybde partial                                                          | custom          |
| NA                | 3948           | Chromobox protein-like protein partial                                            | custom          |
| 90233             | 3949           | ATP synthase subunit beta mitochondrial partial                                   | custom          |
| NA                | 3950           | Glutathione S-transferase Mu 1 partial                                            | custom          |
| NA                | 3951           | Ubiquinone biosynthesis protein COQ4-like protein mitochondrial partial           | custom          |

**Supplemental Table 3 – continued from previous page**

| <b>Arthropod Core ID</b> | <b>Spider Core ID</b> | <b>Putative Ortholog Description</b>                                      | <b>Target Database</b> |
|--------------------------|-----------------------|---------------------------------------------------------------------------|------------------------|
| NA                       | 3952                  | Calbindin-32 partial                                                      | custom                 |
| NA                       | 3954                  | 28S ribosomal protein S5 mitochondrial partial                            | custom                 |
| 90401                    | 3955                  | S-methyl-5'-thioadenosine phosphorylase partial                           | custom                 |
| NA                       | 3957                  | hypothetical protein X975 14961 partial                                   | custom                 |
| NA                       | 3958                  | Alanine-glyoxylate aminotransferase 2-like 1 partial                      | custom                 |
| NA                       | 3959                  | Syndecan partial                                                          | custom                 |
| 90568                    | 3963                  | Fumarate hydratase mitochondrial partial                                  | custom                 |
| NA                       | 3964                  | putative ankyrin repeat protein partial                                   | custom                 |
| 89871                    | 3965                  | Ribonucleoside-diphosphate reductase subunit M2 partial                   | custom                 |
| NA                       | 3966                  | NFU1 iron-sulfur cluster scaffold-like protein mitochondrial partial      | custom                 |
| NA                       | 3967                  | F-box only protein 9 partial                                              | custom                 |
| NA                       | 3968                  | Factor VIII intron 22 protein partial                                     | custom                 |
| 90083                    | 3969                  | Electron transfer flavoprotein subunit beta partial                       | custom                 |
| 89996                    | 3970                  | Translocating chain-associated membrane protein 1 partial                 | custom                 |
| NA                       | 3971                  | hypothetical protein X975 04856 partial                                   | custom                 |
| 89679                    | 3974                  | Nuclear pore membrane glycoprotein 210 partial                            | custom                 |
| 90069                    | 3977                  | Succinyl-CoA ligase [ADP/GDP-forming] subunit alpha mitochondrial partial | custom                 |
| NA                       | 3981                  | 26S proteasome non-ATPase regulatory subunit 13 partial                   | custom                 |

Supplemental Table 3 – continued from previous page

| Arthropod Core ID | Spider Core ID | Putative Ortholog Description                                                 | Target Database |
|-------------------|----------------|-------------------------------------------------------------------------------|-----------------|
| NA                | 3987           | Trafficking protein particle complex subunit 2-like protein partial           | custom          |
| NA                | 3988           | 60S ribosomal protein L23a partial                                            | custom          |
| NA                | 3989           | Counting factor associated protein D partial                                  | custom          |
| NA                | 3992           | Ras-related protein Rab-22A partial                                           | custom          |
| NA                | 3993           | Exosome component 10 partial                                                  | custom          |
| 90539             | 3994           | hypothetical protein X975 22281 partial                                       | custom          |
| 90035             | 3995           | 26S proteasome non-ATPase regulatory subunit 9 partial                        | custom          |
| NA                | 3996           | Synergin gamma partial                                                        | custom          |
| NA                | 3998           | hypothetical protein X975 25529 partial                                       | custom          |
| NA                | 3999           | Synaptotagmin-like protein 5 partial                                          | custom          |
| NA                | 4000           | Solute carrier family 25 member 39 partial                                    | custom          |
| NA                | 4001           | Prenylated Rab acceptor protein 1 partial                                     | custom          |
| NA                | 4003           | hypothetical protein X975 15992 partial                                       | custom          |
| NA                | 4004           | hypothetical protein X975 21126 partial                                       | custom          |
| NA                | 4005           | 60S ribosomal protein L10a-2 partial                                          | custom          |
| NA                | 4006           | Inhibitor of growth protein 3 partial                                         | custom          |
| 90077             | 4008           | Galactosylgalactosylxylosylprotein 3-beta-glucuronosyltransferase 3 partial   | custom          |
| NA                | 4009           | Protein prenyltransferase alpha subunit repeat-containing protein 1-B partial | custom          |
| NA                | 4010           | hypothetical protein X975 00334 partial                                       | custom          |

**Supplemental Table 3 – continued from previous page**

| <b>Arthropod Core ID</b> | <b>Spider Core ID</b> | <b>Putative Ortholog Description</b>                               | <b>Target Database</b> |
|--------------------------|-----------------------|--------------------------------------------------------------------|------------------------|
| 89684                    | 4012                  | NAD kinase domain-containing protein 1 partial                     | custom                 |
| NA                       | 4013                  | Ribosomal RNA-processing protein 7-like protein partial            | custom                 |
| NA                       | 4015                  | Cyclin-H partial                                                   | custom                 |
| NA                       | 4017                  | Solute carrier family 25 member 36 partial                         | custom                 |
| NA                       | 4018                  | Heat shock protein beta-1 partial                                  | custom                 |
| NA                       | 4019                  | Pentatricopeptide repeat-containing protein 2 partial              | custom                 |
| NA                       | 4020                  | Chloride intracellular channel exl-1 partial                       | custom                 |
| NA                       | 4021                  | LETM1 domain-containing protein 1 partial                          | custom                 |
| NA                       | 4022                  | Exosome complex component RRP42 partial                            | custom                 |
| 89736                    | 4023                  | BTB/POZ domain-containing protein 3 partial                        | custom                 |
| NA                       | 4024                  | Prostaglandin E synthase 2 partial                                 | custom                 |
| NA                       | 4026                  | Male-specific lethal 3-like protein partial                        | custom                 |
| NA                       | 4027                  | hypothetical protein X975 23947 partial                            | custom                 |
| NA                       | 4028                  | Sesquipedalian-1 partial                                           | custom                 |
| NA                       | 4029                  | Caveolin-1 partial                                                 | custom                 |
| NA                       | 4030                  | Syntaxin-16 partial                                                | custom                 |
| NA                       | 4031                  | 39S ribosomal protein L44 mitochondrial partial                    | custom                 |
| NA                       | 4032                  | hypothetical protein X975 10850 partial                            | custom                 |
| 90491                    | 4033                  | Macrophage erythroblast attacher partial                           | custom                 |
| NA                       | 4034                  | Dual specificity mitogen-activated protein kinase kinase 6 partial | custom                 |

Supplemental Table 3 – continued from previous page

| Arthropod Core ID | Spider Core ID | Putative Ortholog Description                                | Target Database |
|-------------------|----------------|--------------------------------------------------------------|-----------------|
| NA                | 4036           | RILP-like protein-like protein partial                       | custom          |
| NA                | 4039           | Bone morphogenetic protein 3B partial                        | custom          |
| NA                | 4040           | DnaJ-like protein sub-family B member 9 partial              | custom          |
| NA                | 4041           | ATP-binding cassette sub-family G member 5 partial           | custom          |
| NA                | 4042           | N-alpha-acetyltransferase 30 partial                         | custom          |
| 90047             | 4044           | Transmembrane emp24 domain-containing protein 2 partial      | custom          |
| NA                | 4046           | Translationally-controlled tumor protein homolog, TCTP       | nr              |
| NA                | 4048           | hypothetical protein X975 08140 partial                      | custom          |
| NA                | 4049           | Eukaryotic translation elongation factor 1 epsilon-1 partial | custom          |
| NA                | 4050           | Importin-13 partial                                          | custom          |
| NA                | 4052           | Transcription elongation factor B polypeptide 1 partial      | custom          |
| NA                | 4053           | Actin-binding Rho-activating protein partial                 | custom          |
| NA                | 4054           | Tudor domain-containing protein 7 partial                    | custom          |
| NA                | 4057           | Protein N-terminal asparagine amidohydrolase partial         | custom          |
| NA                | 4058           | Ragulator complex protein LAMTOR2 partial                    | custom          |
| 90195             | 4059           | 39S ribosomal protein L50 mitochondrial partial              | custom          |
| NA                | 4060           | Ras-like GTP-binding protein rhoA partial                    | custom          |



**Supplemental Table 3 – continued from previous page**

| <b>Arthropod Core ID</b> | <b>Spider Core ID</b> | <b>Putative Ortholog Description</b>                         | <b>Target Database</b> |
|--------------------------|-----------------------|--------------------------------------------------------------|------------------------|
| NA                       | 4061                  | 39S ribosomal protein L1 mitochondrial partial               | custom                 |
| NA                       | 4062                  | hypothetical protein X975 20218 partial                      | custom                 |
| 89938                    | 4063                  | Golgi to ER traffic protein 4-like protein partial           | custom                 |
| 89647                    | 4065                  | Eukaryotic translation initiation factor 2 subunit 2 partial | custom                 |
| NA                       | 4066                  | E3 ubiquitin-protein ligase TTC3 partial                     | custom                 |
| NA                       | 4067                  | Gamma-glutamylcyclotransferase partial                       | custom                 |
| NA                       | 4068                  | hypothetical protein X975 01638 partial                      | custom                 |
| 90635                    | 4069                  | Maleylacetoacetate isomerase partial                         | custom                 |
| NA                       | 4070                  | Protein SERAC1 partial                                       | custom                 |
| NA                       | 4071                  | hypothetical protein X975 12365 partial                      | custom                 |
| NA                       | 4072                  | hypothetical protein X975 02718 partial                      | custom                 |
| NA                       | 4073                  | U1 small nuclear ribonucleoprotein A partial                 | custom                 |
| NA                       | 4074                  | Translation initiation factor eIF-2B subunit beta partial    | custom                 |
| NA                       | 4075                  | COMM domain-containing protein 7 partial                     | custom                 |
| NA                       | 4076                  | Mitochondrial fission 1 protein partial                      | custom                 |
| NA                       | 4082                  | Short transient receptor hypothetical channel 5 partial      | custom                 |
| NA                       | 4083                  | Exosome complex component RRP45 partial                      | custom                 |
| NA                       | 4084                  | COP9 signalosome complex subunit 6 partial                   | custom                 |
| NA                       | 4085                  | Protein GTLF3B partial                                       | custom                 |

**Supplemental Table 3 – continued from previous page**

| <b>Arthropod Core ID</b> | <b>Spider Core ID</b> | <b>Putative Ortholog Description</b>                                      | <b>Target Database</b> |
|--------------------------|-----------------------|---------------------------------------------------------------------------|------------------------|
| NA                       | 4087                  | LanC-like protein 2 partial                                               | custom                 |
| NA                       | 4088                  | Nucleoporin NDC1 partial                                                  | custom                 |
| 90259                    | 4089                  | Spermatogenesis-associated protein 20 partial                             | custom                 |
| 90307                    | 4091                  | U3 small nucleolar RNA-interacting protein 2 partial                      | custom                 |
| NA                       | 4095                  | WD repeat-containing protein 13 partial                                   | custom                 |
| NA                       | 4096                  | Cyclin-dependent kinase 20 partial                                        | custom                 |
| NA                       | 4097                  | Translation initiation factor eIF-2B subunit alpha partial                | custom                 |
| NA                       | 4098                  | hypothetical protein X975 22635 partial                                   | custom                 |
| NA                       | 4100                  | Cyclin-K partial                                                          | custom                 |
| NA                       | 4101                  | Enoyl-CoA hydratase domain-containing protein 3 mitochondrial partial     | custom                 |
| NA                       | 4103                  | hypothetical protein X975 15478 partial                                   | custom                 |
| NA                       | 4104                  | SUMO-activating enzyme subunit 2 partial                                  | custom                 |
| NA                       | 4105                  | PREDICTED: protein UXT-like                                               | nr                     |
| NA                       | 4106                  | Mitochondrial inner membrane protein OXA1L partial                        | custom                 |
| 90339                    | 4107                  | Phosphorylase b kinase gamma catalytic chain testis/liver isoform partial | custom                 |
| NA                       | 4108                  | Mismatch repair endonuclease PMS2 partial                                 | custom                 |
| NA                       | 4109                  | Rho guanine nucleotide exchange factor 26 partial                         | custom                 |
| NA                       | 4112                  | ATP-dependent DNA helicase Q1 partial                                     | custom                 |
| NA                       | 4114                  | Smoothelin partial                                                        | custom                 |

**Supplemental Table 3 – continued from previous page**

| <b>Arthropod Core ID</b> | <b>Spider Core ID</b> | <b>Putative Ortholog Description</b>                                 | <b>Target Database</b> |
|--------------------------|-----------------------|----------------------------------------------------------------------|------------------------|
| NA                       | 4115                  | Protein Muted-like protein partial                                   | custom                 |
| NA                       | 4121                  | Leucine-rich repeat neuronal protein 2 partial                       | custom                 |
| NA                       | 4123                  | hypothetical protein X975 23168 partial                              | custom                 |
| NA                       | 4126                  | tRNA-specific adenosine deaminase 2 partial                          | custom                 |
| NA                       | 4131                  | Leucine-rich PPR motif-containing protein mitochondrial partial      | custom                 |
| NA                       | 4132                  | Band 4.1-like protein 3 partial                                      | custom                 |
| NA                       | 4133                  | Nuclear pore complex protein Nup153 partial                          | custom                 |
| NA                       | 4135                  | Acyloxyacyl hydrolase partial                                        | custom                 |
| NA                       | 4136                  | putative E3 ubiquitin-protein ligase MY-CBP2 partial                 | custom                 |
| 90003                    | 4138                  | Ribose-5-phosphate isomerase partial                                 | custom                 |
| 90474                    | 4139                  | Calcium-binding protein p22 partial                                  | custom                 |
| NA                       | 4142                  | Protein RRP5-like protein partial                                    | custom                 |
| NA                       | 4143                  | putative sodium/potassium-transporting ATPase subunit beta-3 partial | custom                 |
| NA                       | 4145                  | putative tRNA pseudouridine synthase 2 partial                       | custom                 |
| NA                       | 4146                  | Ras-related protein Rab-40C partial                                  | custom                 |
| NA                       | 4147                  | 39S ribosomal protein L32 mitochondrial partial                      | custom                 |
| NA                       | 4148                  | GPI transamidase component PIG-S partial                             | custom                 |
| NA                       | 4149                  | Pinin partial                                                        | custom                 |
| NA                       | 4150                  | Palmitoyl-protein thioesterase 1 partial                             | custom                 |

Supplemental Table 3 – continued from previous page

| Arthropod Core ID | Spider Core ID | Putative Ortholog Description                                           | Target Database |
|-------------------|----------------|-------------------------------------------------------------------------|-----------------|
| NA                | 4151           | Elongator complex protein 4 partial                                     | custom          |
| 90229             | 4152           | PCI domain-containing protein 2 partial                                 | custom          |
| NA                | 4153           | Cyclin-dependent kinase 9 partial                                       | custom          |
| 90598             | 4155           | N-acetylgalactosamine kinase partial                                    | custom          |
| NA                | 4156           | Glucosylceramidase partial                                              | custom          |
| NA                | 4157           | p21-activated protein kinase-interacting protein 1-like protein partial | custom          |
| 89875             | 4158           | hypothetical protein X975 11894 partial                                 | custom          |
| NA                | 4159           | putative imidazolone-propionase partial                                 | custom          |
| NA                | 4161           | Adenosine deaminase-like protein partial                                | custom          |
| 90163             | 4163           | Bifunctional polynucleotide phosphatase/kinase partial                  | custom          |
| 90010             | 4164           | Protein I(2)37Cc partial                                                | custom          |
| NA                | 4165           | Wee1-like protein kinase partial                                        | custom          |
| NA                | 4166           | Actin-related protein 8 partial                                         | custom          |
| NA                | 4167           | RING finger protein 170 partial                                         | custom          |
| NA                | 4168           | hypothetical protein X975 10461 partial                                 | custom          |
| NA                | 4169           | 1-acyl-sn-glycerol-3-phosphate acyltransferase delta partial            | custom          |
| NA                | 4171           | hypothetical protein X975 15720 partial                                 | custom          |
| NA                | 4172           | Solute carrier family 35 member E2 partial                              | custom          |
| 89781             | 4174           | Proline synthase co-transcribed bacterial-like protein partial          | custom          |

**Supplemental Table 3 – continued from previous page**

| <b>Arthropod Core ID</b> | <b>Spider Core ID</b> | <b>Putative Ortholog Description</b>                             | <b>Target Database</b> |
|--------------------------|-----------------------|------------------------------------------------------------------|------------------------|
| NA                       | 4175                  | Histidine protein methyltransferase 1-like protein partial       | custom                 |
| NA                       | 4176                  | Protein DDI1-like protein partial                                | custom                 |
| NA                       | 4177                  | Protein CNPPD1 partial                                           | custom                 |
| NA                       | 4178                  | Protein IMPACT-A partial                                         | custom                 |
| NA                       | 4179                  | Protein RMD5-like protein partial                                | custom                 |
| NA                       | 4181                  | putative homeodomain transcription factor partial                | custom                 |
| 90369                    | 4183                  | DNA-directed RNA polymerases I II and III subunit RPABC2 partial | custom                 |
| NA                       | 4184                  | Sedoheptulokinase partial                                        | custom                 |
| NA                       | 4185                  | Adenylyl cyclase-associated protein 2 partial                    | custom                 |
| NA                       | 4187                  | 60S ribosomal protein L13 partial                                | custom                 |
| 90519                    | 4188                  | 40S ribosomal protein S5 partial                                 | custom                 |
| NA                       | 4189                  | 28S ribosomal protein S18c mitochondrial partial                 | custom                 |
| NA                       | 4190                  | Centromere/kinetochore protein zw10-like protein partial         | custom                 |
| NA                       | 4191                  | RNA-binding protein 8A partial                                   | custom                 |
| NA                       | 4192                  | Large subunit GT-Pase 1-like protein partial                     | custom                 |
| NA                       | 4193                  | G patch domain and KOW motifs-containing protein partial         | custom                 |
| 90581                    | 4195                  | Mitochondrial intermediate peptidase partial                     | custom                 |
| NA                       | 4196                  | Suppressor of cytokine signaling 6 partial                       | custom                 |

**Supplemental Table 3 – continued from previous page**

| <b>Arthropod Core ID</b> | <b>Spider Core ID</b> | <b>Putative Ortholog Description</b>                                  | <b>Target Database</b> |
|--------------------------|-----------------------|-----------------------------------------------------------------------|------------------------|
| 90222                    | 4197                  | Protein I(2)37Cc partial                                              | custom                 |
| NA                       | 4198                  | Protein arginine N-methyltransferase 6 partial                        | custom                 |
| NA                       | 4201                  | Ankyrin repeat domain-containing protein 27 partial                   | custom                 |
| NA                       | 4202                  | CCAAT/enhancer-binding protein alpha partial                          | custom                 |
| NA                       | 4203                  | Nucleolar MIF4G domain-containing protein 1 partial                   | custom                 |
| NA                       | 4204                  | 39S ribosomal protein L19 mitochondrial partial                       | custom                 |
| NA                       | 4207                  | hypothetical protein X975 02247 partial                               | custom                 |
| 90323                    | 4209                  | SUMO-conjugating enzyme UBC9 partial                                  | custom                 |
| NA                       | 4212                  | UDP-N-acetylglucosamine transporter partial                           | custom                 |
| NA                       | 4213                  | Digestive organ expansion factor-like protein partial                 | custom                 |
| NA                       | 4216                  | Mitochondrial import inner membrane translocase subunit Tim21 partial | custom                 |
| NA                       | 4217                  | General transcription factor IIE subunit 2 partial                    | custom                 |
| NA                       | 4218                  | ADP-ribosylation factor-binding protein GGA1 partial                  | custom                 |
| NA                       | 4220                  | Leucine-rich repeat-containing protein 8A partial                     | custom                 |
| NA                       | 4221                  | Uracil phosphoribosyltransferase-like protein partial                 | custom                 |
| NA                       | 4226                  | Harmonin partial                                                      | custom                 |
| NA                       | 4227                  | Estradiol 17-beta-dehydrogenase 8 partial                             | custom                 |

**Supplemental Table 3 – continued from previous page**

| <b>Arthropod Core ID</b> | <b>Spider Core ID</b> | <b>Putative Ortholog Description</b>                                          | <b>Target Database</b> |
|--------------------------|-----------------------|-------------------------------------------------------------------------------|------------------------|
| NA                       | 4228                  | hypothetical protein X975 11319 partial                                       | custom                 |
| NA                       | 4229                  | Ras-related protein Rab-8A partial                                            | custom                 |
| NA                       | 4231                  | Presenilins-associated rhomboid-like protein mitochondrial partial            | custom                 |
| NA                       | 4232                  | Retinol dehydrogenase 14 partial                                              | custom                 |
| NA                       | 4233                  | Heat shock factor protein 1 partial                                           | custom                 |
| NA                       | 4234                  | Ceramide kinase partial                                                       | custom                 |
| NA                       | 4236                  | Fringe glycosyltransferase partial                                            | custom                 |
| NA                       | 4237                  | Vacuole membrane protein 1 partial                                            | custom                 |
| NA                       | 4238                  | Glutamate-cysteine ligase regulatory subunit partial                          | custom                 |
| NA                       | 4246                  | Serine/threonine-protein kinase LMTK1 partial                                 | custom                 |
| NA                       | 4248                  | Transcriptional repressor p66 alpha partial                                   | custom                 |
| NA                       | 4249                  | putative nuclease HARB11 partial                                              | custom                 |
| NA                       | 4257                  | Short spindle protein 4 partial                                               | custom                 |
| NA                       | 4258                  | Growth arrest and DNA damage-inducible proteins-interacting protein 1 partial | custom                 |
| NA                       | 4259                  | Vacuolar protein sorting-associated protein 37B partial                       | custom                 |
| NA                       | 4260                  | Paramyosin partial                                                            | custom                 |
| NA                       | 4261                  | TWiK family of potassium channels protein 18 partial                          | custom                 |
| NA                       | 4263                  | Transmembrane and TPR repeat-containing protein partial                       | custom                 |

**Supplemental Table 3 – continued from previous page**

| <b>Arthropod Core ID</b> | <b>Spider Core ID</b> | <b>Putative Ortholog Description</b>                         | <b>Target Database</b> |
|--------------------------|-----------------------|--------------------------------------------------------------|------------------------|
| NA                       | 4268                  | Homeobox protein Nkx-2.3 partial                             | custom                 |
| NA                       | 4270                  | Ras-related GTP-binding protein A partial                    | custom                 |
| NA                       | 4273                  | hypothetical protein X975 10671 partial                      | custom                 |
| NA                       | 4275                  | Integrator complex subunit 9 partial                         | custom                 |
| NA                       | 4277                  | hypothetical protein X975 12010 partial                      | custom                 |
| NA                       | 4279                  | Epidermal retinol dehydrogenase 2 partial                    | custom                 |
| NA                       | 4285                  | Conserved oligomeric Golgi complex subunit 8 partial         | custom                 |
| NA                       | 4290                  | Guanine nucleotide-binding protein-like 1 partial            | custom                 |
| 89669                    | 4295                  | Nitric oxide synthase-interacting protein partial            | custom                 |
| NA                       | 4299                  | Peptidyl-prolyl cis-trans isomerase FKBP1A partial           | custom                 |
| NA                       | 4312                  | Telomere length regulation protein TEL2-like protein partial | custom                 |
| 90224                    | 4313                  | Nuclear pore complex protein Nup133 partial                  | custom                 |
| NA                       | 4314                  | hypothetical protein X975 06017 partial                      | custom                 |
| NA                       | 4315                  | Retinoblastoma-like protein 1 partial                        | custom                 |
| NA                       | 4316                  | Inhibitor of growth protein 4 partial                        | custom                 |
| NA                       | 4317                  | Bardet-Biedl syndrome 1 protein partial                      | custom                 |
| NA                       | 4320                  | Eukaryotic translation initiation factor 3 subunit I partial | custom                 |
| NA                       | 4321                  | 17-beta-hydroxysteroid dehydrogenase type 6 partial          | custom                 |



Supplemental Table 3 – continued from previous page

| Arthropod Core ID | Spider Core ID | Putative Ortholog Description                                                | Target Database |
|-------------------|----------------|------------------------------------------------------------------------------|-----------------|
| NA                | 4322           | Nuclear inhibitor of protein phosphatase 1 partial                           | custom          |
| 90556             | 4323           | Leucine-rich repeat-containing protein 58 partial                            | custom          |
| NA                | 4324           | immunoglobulin-binding protein 1                                             | nr              |
| NA                | 4325           | ubiquinone biosynthesis O-methyltransferase, mitochondrial-like              | nr              |
| NA                | 4328           | Importin subunit alpha-3 partial                                             | custom          |
| NA                | 4329           | Ubiquitin domain-containing protein UBFD1 partial                            | custom          |
| NA                | 4331           | hypothetical protein X975 26638 partial                                      | custom          |
| NA                | 4334           | Mediator of RNA polymerase II transcription subunit 22 partial               | custom          |
| NA                | 4335           | Ataxin-3 partial                                                             | custom          |
| NA                | 4337           | hypothetical protein X975 04970 partial                                      | custom          |
| 89935             | 4339           | putative malonyl-CoA-acyl carrier protein transacylase mitochondrial partial | custom          |
| NA                | 4342           | rRNA-processing protein UTP23-like protein partial                           | custom          |
| NA                | 4343           | M-phase phosphoprotein 6 partial                                             | custom          |
| 89887             | 4346           | GDP-mannose 46 dehydratase partial                                           | custom          |
| NA                | 4348           | Methylosome protein 50 partial                                               | custom          |
| NA                | 4349           | Neuronal acetylcholine receptor subunit alpha-2 partial                      | custom          |
| NA                | 4352           | COMM domain-containing protein 9 partial                                     | custom          |

**Supplemental Table 3 – continued from previous page**

| <b>Arthropod Core ID</b> | <b>Spider Core ID</b> | <b>Putative Ortholog Description</b>                                         | <b>Target Database</b> |
|--------------------------|-----------------------|------------------------------------------------------------------------------|------------------------|
| NA                       | 4354                  | Uridine-cytidine kinase 2-B partial                                          | custom                 |
| 90306                    | 4355                  | ATP synthase subunit O mitochondrial partial                                 | custom                 |
| NA                       | 4356                  | Heterogeneous nuclear ribonucleoprotein 27C partial                          | custom                 |
| NA                       | 4357                  | hypothetical protein X975 12086 partial                                      | custom                 |
| NA                       | 4361                  | 60S ribosomal protein L22 partial                                            | custom                 |
| NA                       | 4362                  | Protein disulfide-isomerase partial                                          | custom                 |
| NA                       | 4363                  | antigen AG231 partial                                                        | custom                 |
| NA                       | 4364                  | NADH dehydrogenase [ubiquinone] 1 alpha subcomplex assembly factor 3 partial | custom                 |
| NA                       | 4365                  | Centrin-1 partial                                                            | custom                 |
| NA                       | 4366                  | Protein KTI12-like protein partial                                           | custom                 |
| NA                       | 4368                  | Protein YIPF6 partial                                                        | custom                 |
| NA                       | 4370                  | 39S ribosomal protein L16 mitochondrial partial                              | custom                 |
| 90648                    | 4371                  | RWD domain-containing protein 1 partial                                      | custom                 |
| NA                       | 4374                  | PDZ and LIM domain protein 7 partial                                         | custom                 |
| 90419                    | 4375                  | 60S ribosomal protein L23 partial                                            | custom                 |
| NA                       | 4376                  | Proteasome maturation protein partial                                        | custom                 |
| NA                       | 4377                  | 28S ribosomal protein S30 mitochondrial partial                              | custom                 |
| NA                       | 4378                  | 28S ribosomal protein S11 mitochondrial partial                              | custom                 |
| NA                       | 4379                  | Peptidyl-glycine alpha-amidating monooxygenase partial                       | custom                 |

**Supplemental Table 3 – continued from previous page**

| <b>Arthropod Core ID</b> | <b>Spider Core ID</b> | <b>Putative Ortholog Description</b>                                                  | <b>Target Database</b> |
|--------------------------|-----------------------|---------------------------------------------------------------------------------------|------------------------|
| NA                       | 4380                  | Macrophage migration inhibitory factor partial                                        | custom                 |
| NA                       | 4381                  | NADPH-dependent diflavin oxidoreductase 1 partial                                     | custom                 |
| 89911                    | 4382                  | hypothetical protein X975 07425 partial                                               | custom                 |
| NA                       | 4383                  | Ubiquitin carboxyl-terminal hydrolase 30 partial                                      | custom                 |
| NA                       | 4384                  | RanBP-type and C3HC4-type zinc finger-containing protein 1 partial                    | custom                 |
| NA                       | 4385                  | hypothetical protein X975 25380 partial                                               | custom                 |
| NA                       | 4387                  | Superoxide dismutase [Mn] 1 partial                                                   | custom                 |
| 90136                    | 4388                  | Mitogen-activated protein kinase 14 partial                                           | custom                 |
| NA                       | 4389                  | FERM domain-containing protein 8 partial                                              | custom                 |
| 90001                    | 4390                  | Bystin partial                                                                        | custom                 |
| 90061                    | 4391                  | 39S ribosomal protein L2 mitochondrial partial                                        | custom                 |
| NA                       | 4392                  | Phosducin-like protein partial                                                        | custom                 |
| NA                       | 4393                  | hypothetical protein X975 07699 partial                                               | custom                 |
| NA                       | 4395                  | hypothetical protein X975 10147 partial                                               | custom                 |
| NA                       | 4396                  | THO complex subunit 7-like protein partial                                            | custom                 |
| NA                       | 4397                  | Coiled-coil-helix-coiled-coil-helix domain-containing protein 2 mitochondrial partial | custom                 |
| NA                       | 4398                  | hypothetical protein X975 01115 partial                                               | custom                 |
| NA                       | 4399                  | Ubiquitin-conjugating enzyme E2 H partial                                             | custom                 |

**Supplemental Table 3 – continued from previous page**

| <b>Arthropod Core ID</b> | <b>Spider Core ID</b> | <b>Putative Ortholog Description</b>                                | <b>Target Database</b> |
|--------------------------|-----------------------|---------------------------------------------------------------------|------------------------|
| NA                       | 4401                  | Autophagy-related protein 16-1 partial                              | custom                 |
| NA                       | 4404                  | Pre-mRNA-splicing factor SPF27 partial                              | custom                 |
| NA                       | 4405                  | NEDD8-conjugating enzyme UBE2F partial                              | custom                 |
| NA                       | 4408                  | PREDICTED: protein FAM177A1-like                                    | nr                     |
| 90147                    | 4409                  | Peptidyl-prolyl cis-trans isomerase-like 3 partial                  | custom                 |
| NA                       | 4410                  | Headcase protein-like protein partial                               | custom                 |
| NA                       | 4411                  | Zinc finger CCHC domain-containing protein 9 partial                | custom                 |
| NA                       | 4412                  | Testis-expressed sequence 264 protein partial                       | custom                 |
| NA                       | 4414                  | Coenzyme Q-binding protein COQ10-like protein mitochondrial partial | custom                 |
| 90254                    | 4415                  | putative U3 small nucleolar RNA-associated protein 11 partial       | custom                 |
| 90593                    | 4416                  | 40S ribosomal protein S2 partial                                    | custom                 |
| 90592                    | 4417                  | Prefoldin subunit 4 partial                                         | custom                 |
| NA                       | 4418                  | 60S ribosomal protein L35a partial                                  | custom                 |
| NA                       | 4421                  | Protein LLP-like protein partial                                    | custom                 |
| 89654                    | 4423                  | phosphohistidine phosphatase partial                                | custom                 |
| NA                       | 4424                  | Myosin regulatory light chain sqh partial                           | custom                 |
| NA                       | 4425                  | Deoxyribodipyrimidine photo-lyase partial                           | custom                 |
| NA                       | 4426                  | Quinone oxidoreductase-like protein 2 partial                       | custom                 |

**Supplemental Table 3 – continued from previous page**

| <b>Arthropod Core ID</b> | <b>Spider Core ID</b> | <b>Putative Ortholog Description</b>                        | <b>Target Database</b> |
|--------------------------|-----------------------|-------------------------------------------------------------|------------------------|
| NA                       | 4427                  | putative methylthioribulose-1-phosphate dehydratase partial | custom                 |
| NA                       | 4429                  | hypothetical protein X975 10007 partial                     | custom                 |
| NA                       | 4432                  | PREDICTED: ovarian cancer-associated gene 2 protein homolog | nr                     |
| NA                       | 4433                  | Leucine-rich repeat-containing protein 57 partial           | custom                 |
| 90225                    | 4434                  | 60S ribosomal protein L24 partial                           | custom                 |
| NA                       | 4435                  | Proteasome subunit beta type-4 partial                      | custom                 |
| 89725                    | 4436                  | Uridine 5'-monophosphate synthase partial                   | custom                 |
| 90230                    | 4437                  | DnaJ-like protein subfamily B member 11 partial             | custom                 |
| NA                       | 4438                  | Phosducin-like protein 3 partial                            | custom                 |
| NA                       | 4439                  | Ribosome maturation protein SBDS partial                    | custom                 |
| NA                       | 4440                  | hypothetical protein X975 09445 partial                     | custom                 |
| NA                       | 4441                  | MOB kinase activator 1B partial                             | custom                 |
| NA                       | 4443                  | Prefoldin subunit 6 partial                                 | custom                 |
| NA                       | 4444                  | 39S ribosomal protein L15 mitochondrial partial             | custom                 |
| NA                       | 4445                  | Peptidyl-prolyl cis-trans isomerase partial                 | custom                 |
| 90071                    | 4446                  | Malate dehydrogenase cytoplasmic partial                    | custom                 |
| 89843                    | 4448                  | DNA replication licensing factor mcm5-A partial             | custom                 |
| NA                       | 4449                  | Proteasome subunit alpha type-3 partial                     | custom                 |

**Supplemental Table 3 – continued from previous page**

| <b>Arthropod Core ID</b> | <b>Spider Core ID</b> | <b>Putative Ortholog Description</b>                                             | <b>Target Database</b> |
|--------------------------|-----------------------|----------------------------------------------------------------------------------|------------------------|
| NA                       | 4450                  | putative ribosome biogenesis protein RLP24 partial                               | custom                 |
| 89804                    | 4451                  | putative pyruvate dehydrogenase E1 component subunit alpha mitochondrial partial | custom                 |
| 90248                    | 4452                  | Pantothenate kinase 1 partial                                                    | custom                 |
| 90603                    | 4454                  | 60S ribosomal protein L8 partial                                                 | custom                 |
| NA                       | 4456                  | hypothetical protein X975 07045 partial                                          | custom                 |
| NA                       | 4458                  | Vesicular integral-membrane protein partial                                      | custom                 |
| NA                       | 4459                  | NADH dehydrogenase [ubiquinone] 1 alpha subcomplex subunit 7 partial             | custom                 |
| NA                       | 4463                  | Leucine zipper transcription factor-like protein 1 partial                       | custom                 |
| 90578                    | 4464                  | Protein DJ-1 partial                                                             | custom                 |
| NA                       | 4465                  | Cytochrome b5 partial                                                            | custom                 |
| NA                       | 4466                  | Dual specificity protein phosphatase 19 partial                                  | custom                 |
| NA                       | 4467                  | PREDICTED: rho GDP-dissociation inhibitor 1-like                                 | nr                     |
| NA                       | 4470                  | Dynactin subunit 6 partial                                                       | custom                 |
| NA                       | 4471                  | Ras-related protein Rab-10 partial                                               | custom                 |
| 89665                    | 4472                  | V-type proton ATPase subunit F 1 partial                                         | custom                 |
| NA                       | 4473                  | Vacuolar protein sorting-associated protein 29 partial                           | custom                 |
| NA                       | 4474                  | Syntaxin-8 partial                                                               | custom                 |
| NA                       | 4479                  | Sarcoplasmic calcium-binding proteins I III and IV partial                       | custom                 |

**Supplemental Table 3 – continued from previous page**

| <b>Arthropod Core ID</b> | <b>Spider Core ID</b> | <b>Putative Ortholog Description</b>                             | <b>Target Database</b> |
|--------------------------|-----------------------|------------------------------------------------------------------|------------------------|
| NA                       | 4480                  | Charged multivesicular body protein 2b partial                   | custom                 |
| 90653                    | 4481                  | Proteasome subunit alpha type-7-like protein partial             | custom                 |
| NA                       | 4483                  | hypothetical protein X975 07392 partial                          | custom                 |
| NA                       | 4484                  | Complement factor B partial                                      | custom                 |
| NA                       | 4485                  | 28S ribosomal protein S7 mitochondrial partial                   | custom                 |
| NA                       | 4487                  | Saccharopine dehydrogenase-like oxidoreductase partial           | custom                 |
| 89704                    | 4488                  | Protein YIF1B-A partial                                          | custom                 |
| NA                       | 4489                  | Serine/threonine-protein phosphatase 4 catalytic subunit partial | custom                 |
| NA                       | 4490                  | Ras-related protein partial                                      | custom                 |
| NA                       | 4491                  | Protein LSM12-like protein partial                               | custom                 |
| 90202                    | 4492                  | Coatomer subunit epsilon partial                                 | custom                 |
| 90350                    | 4493                  | Growth hormone-inducible transmembrane protein partial           | custom                 |
| NA                       | 4495                  | Succinate-semialdehyde dehydrogenase mitochondrial partial       | custom                 |
| NA                       | 4496                  | hypothetical protein X975 05777 partial                          | custom                 |
| 89878                    | 4497                  | Ubiquitin domain-containing protein 1 partial                    | custom                 |
| NA                       | 4499                  | DNA replication licensing factor mcm4-A partial                  | custom                 |
| NA                       | 4500                  | DNA polymerase epsilon subunit 3 partial                         | custom                 |

Supplemental Table 3 – continued from previous page

| Arthropod Core ID | Spider Core ID | Putative Ortholog Description                                  | Target Database |
|-------------------|----------------|----------------------------------------------------------------|-----------------|
| NA                | 4501           | Isoamyl acetate-hydrolyzing esterase 1-like protein partial    | custom          |
| NA                | 4503           | MACRO domain-containing protein 2 partial                      | custom          |
| NA                | 4504           | Plasma kallikrein partial                                      | custom          |
| NA                | 4505           | Fibrillin-1 partial                                            | custom          |
| NA                | 4510           | Caprin-1 partial                                               | custom          |
| NA                | 4514           | Transmembrane protease serine 9 partial                        | custom          |
| NA                | 4515           | Phosphomannomutase 2 partial                                   | custom          |
| 89779             | 4517           | Neuroguidin-A partial                                          | custom          |
| NA                | 4519           | putative glucosamine 6-phosphate N-acetyltransferase partial   | custom          |
| NA                | 4521           | 28S ribosomal protein S9 mitochondrial partial                 | custom          |
| NA                | 4522           | 60S ribosomal protein L14 partial                              | custom          |
| 90600             | 4524           | Iron-sulfur cluster assembly enzyme ISCU mitochondrial partial | custom          |
| 90174             | 4525           | Signal recognition particle receptor subunit beta partial      | custom          |
| NA                | 4526           | Peptidyl-prolyl cis-trans isomerase FKBP12 partial             | custom          |
| NA                | 4528           | Something about silencing protein 10 partial                   | custom          |
| NA                | 4529           | putative protein-like protein partial                          | custom          |
| NA                | 4530           | Pre-rRNA-processing protein esf2 partial                       | custom          |
| 90322             | 4531           | Peptidyl-prolyl cis-trans isomerase-like 2 partial             | custom          |
| NA                | 4532           | putative 28S ribosomal protein S26 mitochondrial partial       | custom          |



**Supplemental Table 3 – continued from previous page**

| <b>Arthropod Core ID</b> | <b>Spider Core ID</b> | <b>Putative Ortholog Description</b>                                   | <b>Target Database</b> |
|--------------------------|-----------------------|------------------------------------------------------------------------|------------------------|
| NA                       | 4533                  | Troponin I partial                                                     | custom                 |
| NA                       | 4534                  | PREDICTED: mediator of RNA polymerase II transcription subunit 21-like | nr                     |
| 90286                    | 4535                  | Ribosome production factor 1 partial                                   | custom                 |
| NA                       | 4537                  | Transmembrane protein 53 partial                                       | custom                 |
| NA                       | 4538                  | Zinc finger FYVE domain-containing protein 21 partial                  | custom                 |
| NA                       | 4539                  | putative aarF domain-containing protein kinase 5 partial               | custom                 |
| 89863                    | 4540                  | COP9 signalosome complex subunit 4 partial                             | custom                 |
| NA                       | 4541                  | Replication factor C subunit 3 partial                                 | custom                 |
| NA                       | 4542                  | 3-hydroxyacyl-CoA dehydratase partial                                  | custom                 |
| NA                       | 4544                  | Unconventional pre-foldin RPB5 interactor 1 partial                    | custom                 |
| NA                       | 4545                  | U4/U6 small nuclear ribonucleoprotein Prp4 partial                     | custom                 |
| NA                       | 4546                  | hypothetical protein X975 16775 partial                                | custom                 |
| NA                       | 4547                  | Ubiquitin-like protein 3 partial                                       | custom                 |
| NA                       | 4548                  | Protein wntless partial                                                | custom                 |
| NA                       | 4549                  | Transmembrane protein 55B partial                                      | custom                 |
| NA                       | 4550                  | COMM domain-containing protein 10 partial                              | custom                 |
| NA                       | 4551                  | LSM domain-containing protein 1 partial                                | custom                 |
| 90076                    | 4553                  | Thioredoxin-related transmembrane protein 2-like protein partial       | custom                 |
| NA                       | 4554                  | Protein BANP partial                                                   | custom                 |

Supplemental Table 3 – continued from previous page

| Arthropod Core ID | Spider Core ID | Putative Ortholog Description                                                  | Target Database |
|-------------------|----------------|--------------------------------------------------------------------------------|-----------------|
| NA                | 4555           | Diphthamide biosynthesis protein 1 partial                                     | custom          |
| NA                | 4559           | GPN-loop GTPase 2 partial                                                      | custom          |
| NA                | 4561           | Cleavage and polyadenylation specificity factor subunit 5 partial              | custom          |
| NA                | 4562           | Translation initiation factor eIF-2B subunit gamma partial                     | custom          |
| NA                | 4563           | Serum response factor partial                                                  | custom          |
| NA                | 4564           | Zinc finger protein Noc partial                                                | custom          |
| NA                | 4565           | Succinate dehydrogenase [ubiquinone] iron-sulfur subunit mitochondrial partial | custom          |
| NA                | 4566           | NEDD8-conjugating enzyme Ubc12 partial                                         | custom          |
| 89723             | 4568           | hypothetical protein X975 00032 partial                                        | custom          |
| NA                | 4571           | Cytochrome c partial                                                           | custom          |
| NA                | 4572           | hypothetical protein X975 22559 partial                                        | custom          |
| NA                | 4576           | Protein CDV3-like protein partial                                              | custom          |
| NA                | 4577           | NudC domain-containing protein 3 partial                                       | custom          |
| NA                | 4579           | hypothetical protein X975 05206 partial                                        | custom          |
| 89780             | 4580           | Pyridoxine-5'-phosphate oxidase partial                                        | custom          |
| NA                | 4582           | E3 ubiquitin-protein ligase NRDP1 partial                                      | custom          |
| NA                | 4583           | ATPase ASNA1-like protein partial                                              | custom          |
| NA                | 4584           | F-box/WD repeat-containing protein 9 partial                                   | custom          |
| NA                | 4586           | 39S ribosomal protein L30 mitochondrial partial                                | custom          |

**Supplemental Table 3 – continued from previous page**

| <b>Arthropod Core ID</b> | <b>Spider Core ID</b> | <b>Putative Ortholog Description</b>                                                | <b>Target Database</b> |
|--------------------------|-----------------------|-------------------------------------------------------------------------------------|------------------------|
| NA                       | 4587                  | Histone deacetylase 11 partial                                                      | custom                 |
| NA                       | 4588                  | TBC1 domain family member 20 partial                                                | custom                 |
| NA                       | 4589                  | Acyl carrier protein mitochondrial partial                                          | custom                 |
| NA                       | 4590                  | NAD-dependent lysine demalonylase and desuccinylase sirtuin-5 mitochondrial partial | custom                 |
| 90329                    | 4591                  | Partner of Y14 and mago partial                                                     | custom                 |
| NA                       | 4592                  | Copper homeostasis protein CutC partial                                             | custom                 |
| NA                       | 4593                  | Transmembrane protein 198-B partial                                                 | custom                 |
| NA                       | 4594                  | Abhydrolase domain-containing protein 11 partial                                    | custom                 |
| NA                       | 4595                  | Transcription factor BTF3-like protein partial                                      | custom                 |
| NA                       | 4596                  | PREDICTED: protein SCO1 homolog, mitochondrial-like isoform                         | nr                     |
| NA                       | 4597                  | Mitochondrial carrier-like protein partial                                          | custom                 |
| NA                       | 4598                  | Septin-1 partial                                                                    | custom                 |
| NA                       | 4599                  | hypothetical protein X975 05218 partial                                             | custom                 |
| NA                       | 4604                  | Phosphomevalonate kinase partial                                                    | custom                 |
| NA                       | 4606                  | hypothetical protein X975 21756 partial                                             | custom                 |
| NA                       | 4607                  | Chitinase domain-containing protein 1 partial                                       | custom                 |
| NA                       | 4608                  | putative tRNA threonylcarbamoyladenosine biosynthesis protein Osgep11 partial       | custom                 |
| NA                       | 4609                  | Tetraspanin-11 partial                                                              | custom                 |

**Supplemental Table 3 – continued from previous page**

| <b>Arthropod Core ID</b> | <b>Spider Core ID</b> | <b>Putative Ortholog Description</b>                                           | <b>Target Database</b> |
|--------------------------|-----------------------|--------------------------------------------------------------------------------|------------------------|
| NA                       | 4614                  | RNA polymerase II-associated protein 3 partial                                 | custom                 |
| 89865                    | 4616                  | Vacuolar protein sorting-associated protein 72-like protein partial            | custom                 |
| 89716                    | 4617                  | ATP-dependent Clp protease ATP-binding subunit clpX-like mitochondrial partial | custom                 |
| NA                       | 4620                  | Thioredoxin domain-containing protein 15 partial                               | custom                 |
| NA                       | 4622                  | FERM and PDZ domain-containing protein 4 partial                               | custom                 |
| NA                       | 4624                  | hypothetical protein X975 00426 partial                                        | custom                 |
| NA                       | 4625                  | Protein SHQ1-like protein partial                                              | custom                 |
| 90132                    | 4626                  | hypothetical protein X975 14088 partial                                        | custom                 |
| NA                       | 4627                  | hypothetical protein X975 15044 partial                                        | custom                 |
| 89962                    | 4631                  | DnaJ-like protein sub-family C member 21 partial                               | custom                 |
| NA                       | 4633                  | hypothetical protein X975 26412 partial                                        | custom                 |
| NA                       | 4637                  | Peptide-N(4)-(N-acetyl-beta-glucosaminy)asparagine amidase partial             | custom                 |
| NA                       | 4638                  | Neurochondrin-like protein partial                                             | custom                 |
| NA                       | 4641                  | Tetratricopeptide repeat protein 17 partial                                    | custom                 |
| NA                       | 4648                  | hypothetical protein X975 18490 partial                                        | custom                 |
| NA                       | 4653                  | F-box/LRR-repeat protein 14 partial                                            | custom                 |
| NA                       | 4657                  | BRISC and BRCA1-A complex member 1 partial                                     | custom                 |
| NA                       | 4659                  | Ankyrin repeat and SOCS box protein 3 partial                                  | custom                 |

Supplemental Table 3 – continued from previous page

| Arthropod Core ID | Spider Core ID | Putative Ortholog Description                                                | Target Database |
|-------------------|----------------|------------------------------------------------------------------------------|-----------------|
| NA                | 4660           | BolA-like protein 1 partial                                                  | custom          |
| 89963             | 4661           | KRR1 small subunit processome component-like protein partial                 | custom          |
| NA                | 4662           | Mediator of RNA polymerase II transcription subunit 26 partial               | custom          |
| NA                | 4663           | AN1-type zinc finger protein 6 partial                                       | custom          |
| NA                | 4665           | Midnolin partial                                                             | custom          |
| NA                | 4666           | Type II inositol-145-trisphosphate 5-phosphatase partial                     | custom          |
| NA                | 4668           | hypothetical protein X975 26482 partial                                      | custom          |
| 89826             | 4670           | Phospholipid scramblase 2 partial                                            | custom          |
| 89932             | 4671           | Polyphosphoinositide phosphatase partial                                     | custom          |
| NA                | 4672           | Gephyrin partial                                                             | custom          |
| NA                | 4673           | hypothetical protein X975 14777 partial                                      | custom          |
| 90565             | 4674           | Autophagy protein 5 partial                                                  | custom          |
| NA                | 4675           | Zinc transporter ZIP3 partial                                                | custom          |
| NA                | 4677           | Basement membrane-specific heparan sulfate proteoglycan core protein partial | custom          |
| NA                | 4679           | Ras-related protein Rab-1A partial                                           | custom          |
| NA                | 4680           | Proteasome activator complex subunit 3 partial                               | custom          |
| NA                | 4682           | Histidine triad nucleotide-binding protein 1 partial                         | custom          |
| NA                | 4683           | Protein LZIC partial                                                         | custom          |
| NA                | 4684           | PREDICTED: uncharacterized protein C7orf50 homolog isoform                   | nr              |
| NA                | 4685           | hypothetical protein X975 01775 partial                                      | custom          |

**Supplemental Table 3 – continued from previous page**

| <b>Arthropod Core ID</b> | <b>Spider Core ID</b> | <b>Putative Ortholog Description</b>                                       | <b>Target Database</b> |
|--------------------------|-----------------------|----------------------------------------------------------------------------|------------------------|
| NA                       | 4686                  | Transposable element Tcb1 transposase partial                              | custom                 |
| NA                       | 4687                  | Histone H2B partial                                                        | custom                 |
| NA                       | 4688                  | hypothetical protein X975 06560 partial                                    | custom                 |
| NA                       | 4691                  | WD repeat-containing protein 46 partial                                    | custom                 |
| 89859                    | 4693                  | WD repeat-containing protein 18 partial                                    | custom                 |
| NA                       | 4694                  | Diphthine synthase partial                                                 | custom                 |
| NA                       | 4695                  | Anaphase-promoting complex subunit 7 partial                               | custom                 |
| NA                       | 4696                  | hypothetical protein X975 09931 partial                                    | custom                 |
| NA                       | 4698                  | hypothetical protein X975 04396 partial                                    | custom                 |
| 90295                    | 4699                  | Methyltransferase-like protein 13 partial                                  | custom                 |
| 90002                    | 4700                  | Peptidylprolyl isomerase domain and WD repeat-containing protein 1 partial | custom                 |
| NA                       | 4701                  | PREDICTED: nucleolar protein 9-like                                        | nr                     |
| 90398                    | 4703                  | Elongation factor 1-beta partial                                           | custom                 |
| NA                       | 4705                  | putative actin-related protein 2/3 complex subunit 2 partial               | custom                 |
| NA                       | 4706                  | mRNA cap guanine-N7 methyltransferase partial                              | custom                 |
| NA                       | 4707                  | CCR4-NOT transcription complex subunit 3 partial                           | custom                 |
| NA                       | 4708                  | Ras guanine nucleotide exchange factor F partial                           | custom                 |
| NA                       | 4709                  | GDP-L-fucose synthase partial                                              | custom                 |

Supplemental Table 3 – continued from previous page

| Arthropod Core ID | Spider Core ID | Putative Ortholog Description                           | Target Database |
|-------------------|----------------|---------------------------------------------------------|-----------------|
| NA                | 4710           | 39S ribosomal protein L27 mitochondrial partial         | custom          |
| NA                | 4711           | MHC class II regulatory factor RFX1 partial             | custom          |
| 90255             | 4712           | putative ATP-dependent RNA helicase DDX10 partial       | custom          |
| NA                | 4714           | 60S ribosomal protein L7a partial                       | custom          |
| NA                | 4715           | Mitochondrial GTPase 1 partial                          | custom          |
| NA                | 4718           | Protein FAM8A1 partial                                  | custom          |
| NA                | 4719           | hypothetical protein X975 16784 partial                 | custom          |
| NA                | 4721           | CUB and sushi domain-containing protein 3 partial       | custom          |
| NA                | 4722           | Serine/threonine-protein kinase SMG1 partial            | custom          |
| NA                | 4723           | PITH domain-containing protein partial                  | custom          |
| NA                | 4724           | calcium-binding protein partial                         | custom          |
| NA                | 4727           | hypothetical protein X975 23666 partial                 | custom          |
| NA                | 4728           | Pallidin partial                                        | custom          |
| 89838             | 4729           | Cell division cycle 7-related protein kinase partial    | custom          |
| NA                | 4730           | Protein downstream neighbor of son-like protein partial | custom          |
| NA                | 4731           | Peptidyl-prolyl cis-trans isomerase H partial           | custom          |
| NA                | 4732           | Pentatricopeptide repeat-containing protein 1 partial   | custom          |
| NA                | 4733           | hypothetical protein X975 23126 partial                 | custom          |
| NA                | 4734           | Actin-related protein 10 partial                        | custom          |

Supplemental Table 3 – continued from previous page

| Arthropod Core ID | Spider Core ID | Putative Ortholog Description                                                        | Target Database |
|-------------------|----------------|--------------------------------------------------------------------------------------|-----------------|
| NA                | 4735           | RING finger protein 121 partial                                                      | custom          |
| NA                | 4739           | Pre-mRNA-splicing factor ATP-dependent RNA helicase PRP16 partial                    | custom          |
| NA                | 4742           | Complement component 1 Q subcomponent-binding protein mitochondrial partial          | custom          |
| NA                | 4744           | PREDICTED: pre-foldin subunit 2                                                      | nr              |
| 90459             | 4745           | hypothetical protein X975 21674 partial                                              | custom          |
| NA                | 4746           | Brefeldin A-inhibited guanine nucleotide-exchange protein 2 partial                  | custom          |
| NA                | 4747           | SURP and G-patch domain-containing protein 1 partial                                 | custom          |
| NA                | 4748           | E3 ubiquitin-protein ligase RNF146 partial                                           | custom          |
| NA                | 4749           | Pre-mRNA 3'-end-processing factor FIP1 partial                                       | custom          |
| 89784             | 4751           | Ras suppressor protein 1 partial                                                     | custom          |
| NA                | 4754           | hypothetical protein X975 01094 partial                                              | custom          |
| NA                | 4757           | Serpin B8 partial                                                                    | custom          |
| NA                | 4759           | LON peptidase N-terminal domain and RING finger protein 3 partial                    | custom          |
| NA                | 4763           | Kelch domain-containing protein 10 partial                                           | custom          |
| NA                | 4764           | NA                                                                                   | nr              |
| NA                | 4769           | Serine/threonine-protein phosphatase 2A regulatory subunit B'' subunit gamma partial | custom          |
| 89666             | 4779           | Proteasome subunit beta type-3 partial                                               | custom          |



**Supplemental Table 3 – continued from previous page**

| <b>Arthropod Core ID</b> | <b>Spider Core ID</b> | <b>Putative Ortholog Description</b>                                 | <b>Target Database</b> |
|--------------------------|-----------------------|----------------------------------------------------------------------|------------------------|
| NA                       | 4780                  | Proteasome inhibitor PI31 subunit partial                            | custom                 |
| NA                       | 4781                  | Acetylcholinesterase partial                                         | custom                 |
| NA                       | 4786                  | Hyccin partial                                                       | custom                 |
| 90097                    | 4787                  | Elongation factor Tu mitochondrial partial                           | custom                 |
| NA                       | 4791                  | putative ATP-dependent RNA helicase DDX49 partial                    | custom                 |
| NA                       | 4794                  | Proteasome subunit beta type-5 partial                               | custom                 |
| NA                       | 4795                  | Elongation factor Tu GTP-binding domain-containing protein 1 partial | custom                 |
| NA                       | 4796                  | Aquaporin-9 partial                                                  | custom                 |
| NA                       | 4797                  | hypothetical protein BRAFLDRAFT 260972                               | nr                     |
| NA                       | 4800                  | G patch domain-containing protein 1 partial                          | custom                 |
| NA                       | 4801                  | Serine/threonine-protein kinase B-raf partial                        | custom                 |
| NA                       | 4802                  | Rab-like protein 3 partial                                           | custom                 |
| NA                       | 4804                  | Lysophospholipid acyltransferase 5 partial                           | custom                 |
| 89928                    | 4806                  | DnaJ-like protein subfamily C member 17 partial                      | custom                 |
| NA                       | 4809                  | Protein FAM45A partial                                               | custom                 |
| NA                       | 4810                  | BTB/POZ domain-containing protein 2 partial                          | custom                 |
| NA                       | 4812                  | Ankyrin repeat and IBR domain-containing protein 1 partial           | custom                 |
| NA                       | 4815                  | Sialin partial                                                       | custom                 |
| NA                       | 4823                  | PREDICTED: uncharacterized protein LOC106475977                      | nr                     |

**Supplemental Table 3 – continued from previous page**

| <b>Arthropod Core ID</b> | <b>Spider Core ID</b> | <b>Putative Ortholog Description</b>                                            | <b>Target Database</b> |
|--------------------------|-----------------------|---------------------------------------------------------------------------------|------------------------|
| NA                       | 4824                  | Exostosin-2 partial                                                             | custom                 |
| 90217                    | 4830                  | V-type proton AT-Pase subunit G partial                                         | custom                 |
| NA                       | 4832                  | hypothetical protein X975 21262 partial                                         | custom                 |
| NA                       | 4834                  | 39S ribosomal protein L46 mitochondrial partial                                 | custom                 |
| NA                       | 4835                  | N6-adenosine-methyltransferase subunit partial                                  | custom                 |
| NA                       | 4842                  | Protein SMG8 partial                                                            | custom                 |
| NA                       | 4843                  | putative cytosolic iron-sulfur protein assembly protein CIAO1 partial           | custom                 |
| NA                       | 4844                  | AP-4 complex subunit mu-1 partial                                               | custom                 |
| NA                       | 4846                  | Exosome complex component RRP43 partial                                         | custom                 |
| NA                       | 4847                  | Coatomer subunit zeta-1 partial                                                 | custom                 |
| NA                       | 4853                  | Apoptosis regulator BAX partial                                                 | custom                 |
| NA                       | 4865                  | Lariat debranching enzyme partial                                               | custom                 |
| NA                       | 4866                  | PAB-dependent poly(A)-specific ribonuclease subunit 2 partial                   | custom                 |
| 90185                    | 4869                  | TFIIH basal transcription factor complex helicase XPD subunit partial           | custom                 |
| NA                       | 4876                  | Translocase of inner mitochondrial membrane domain-containing protein 1 partial | custom                 |
| NA                       | 4879                  | F-box only protein 25 partial                                                   | custom                 |
| 90193                    | 4882                  | Ubiquitin-conjugating enzyme E2 partial                                         | custom                 |
| NA                       | 4884                  | Protein FAM195A partial                                                         | custom                 |

Supplemental Table 3 – continued from previous page

| Arthropod Core ID | Spider Core ID | Putative Ortholog Description                                     | Target Database |
|-------------------|----------------|-------------------------------------------------------------------|-----------------|
| 90650             | 4888           | DNA-directed RNA polymerase III subunit RPC2 partial              | custom          |
| 90412             | 4891           | Malate dehydrogenase mitochondrial partial                        | custom          |
| NA                | 4895           | putative oxidoreductase partial                                   | custom          |
| 89814             | 4897           | Transmembrane emp24 domain-containing protein 7 partial           | custom          |
| 89799             | 4898           | Phosphatidylethanolamine-binding protein 1 partial                | custom          |
| NA                | 4899           | Phenazine biosynthesis-like domain-containing protein 1 partial   | custom          |
| NA                | 4900           | PREDICTED: citrate lyase subunit beta-like protein, mitochondrial | nr              |
| NA                | 4902           | Ribosome biogenesis regulatory protein-like protein partial       | custom          |
| NA                | 4903           | hypothetical protein X975 07982 partial                           | custom          |
| NA                | 4904           | PREDICTED: multiple myeloma tumor-associated protein 2 homolog    | nr              |
| NA                | 4905           | putative ATP-dependent RNA helicase DDX5 partial                  | custom          |
| NA                | 4906           | 39S ribosomal protein L54 mitochondrial partial                   | custom          |
| 90257             | 4908           | ATP synthase subunit d mitochondrial partial                      | custom          |
| 90604             | 4909           | hypothetical protein X975 22133 partial                           | custom          |
| NA                | 4910           | Polymerase delta-interacting protein 2 partial                    | custom          |

Supplemental Table 3 – continued from previous page

| Arthropod Core ID | Spider Core ID | Putative Ortholog Description                                                        | Target Database |
|-------------------|----------------|--------------------------------------------------------------------------------------|-----------------|
| NA                | 4911           | 39S ribosomal protein L49 mitochondrial partial                                      | custom          |
| 89950             | 4912           | 60S ribosomal protein L28 partial                                                    | custom          |
| 90098             | 4913           | PREDICTED: ATP synthase subunit g, mitochondrial-like                                | nr              |
| NA                | 4914           | N-acetylserotonin O-methyltransferase-like protein partial                           | custom          |
| NA                | 4915           | Transmembrane protein 59-like protein partial                                        | custom          |
| 90244             | 4916           | Translocon-associated protein subunit beta partial                                   | custom          |
| NA                | 4917           | NADH dehydrogenase [ubiquinone] 1 beta subcomplex subunit 8 mitochondrial partial    | custom          |
| NA                | 4918           | Vesicle-associated membrane protein-associated protein A partial                     | custom          |
| 89931             | 4919           | hypothetical protein X975 09949 partial                                              | custom          |
| NA                | 4922           | Beclin-1 partial                                                                     | custom          |
| 90612             | 4923           | Nicotinate phosphoribosyltransferase partial                                         | custom          |
| 89926             | 4924           | Mitochondrial import inner membrane translocase subunit tim16-A partial              | custom          |
| NA                | 4925           | Breast carcinoma-amplified sequence 3-like protein partial                           | custom          |
| NA                | 4929           | Protein boule partial                                                                | custom          |
| NA                | 4930           | YEATS domain-containing protein 2 partial                                            | custom          |
| NA                | 4931           | PREDICTED: tRNA (adenine(58)-N(1))-methyltransferase non-catalytic subunit TRM6-like | nr              |

**Supplemental Table 3 – continued from previous page**

| <b>Arthropod Core ID</b> | <b>Spider Core ID</b> | <b>Putative Ortholog Description</b>                                    | <b>Target Database</b> |
|--------------------------|-----------------------|-------------------------------------------------------------------------|------------------------|
| NA                       | 4932                  | hypothetical protein X975 16313 partial                                 | custom                 |
| NA                       | 4933                  | Limkain-b1 partial                                                      | custom                 |
| NA                       | 4934                  | Fukutin partial                                                         | custom                 |
| 90462                    | 4935                  | Repressor of RNA polymerase III transcription MAF1-like protein partial | custom                 |
| NA                       | 4936                  | DnaJ-like protein subfamily C member 8 partial                          | custom                 |
| 90029                    | 4937                  | 60S ribosomal protein L13a partial                                      | custom                 |
| NA                       | 4938                  | putative peptidyl-tRNA hydrolase 2 partial                              | custom                 |
| NA                       | 4939                  | Huntingtin-interacting protein K partial                                | custom                 |
| 90613                    | 4940                  | Histone-lysine N-methyltransferase SETMAR partial                       | custom                 |
| NA                       | 4942                  | Lysozyme partial                                                        | custom                 |
| 89854                    | 4943                  | 60S ribosomal protein L32 partial                                       | custom                 |
| NA                       | 4944                  | 40S ribosomal protein SA partial                                        | custom                 |
| NA                       | 4945                  | Pre-mRNA branch site p14-like protein partial                           | custom                 |
| 89668                    | 4947                  | U3 small nucleolar ribonucleoprotein IMP3 partial                       | custom                 |
| NA                       | 4949                  | Ras-related protein Rab-4B partial                                      | custom                 |
| NA                       | 4950                  | Synaptotagmin-9 partial                                                 | custom                 |
| 90492                    | 4951                  | 60S ribosomal protein L10 partial                                       | custom                 |
| NA                       | 4953                  | Proteasome subunit alpha type-6 partial                                 | custom                 |
| NA                       | 4954                  | 39S ribosomal protein L47 mitochondrial partial                         | custom                 |
| NA                       | 4955                  | General transcription factor IIF subunit 2 partial                      | custom                 |

Supplemental Table 3 – continued from previous page

| Arthropod Core ID | Spider Core ID | Putative Ortholog Description                                                 | Target Database |
|-------------------|----------------|-------------------------------------------------------------------------------|-----------------|
| NA                | 4957           | Mitochondrial import inner membrane translocase subunit Tim22 partial         | custom          |
| NA                | 4958           | UDP-N-acetylglucosamine transferase subunit ALG13-like protein partial        | custom          |
| NA                | 4959           | 40S ribosomal protein S25 partial                                             | custom          |
| NA                | 4960           | U6 snRNA-associated Sm-like protein LSM4 partial                              | custom          |
| NA                | 4961           | Sorting nexin-12 partial                                                      | custom          |
| NA                | 4962           | CD2 antigen cytoplasmic tail-binding protein 2 partial                        | custom          |
| 89719             | 4963           | PREDICTED: NADH dehydrogenase [ubiquinone] 1 alpha subcomplex subunit 13-like | nr              |
| NA                | 4964           | RNA-binding protein 4.1 partial                                               | custom          |
| NA                | 4965           | MOB-like protein phocein partial                                              | custom          |
| 90075             | 4966           | RING-box protein 1 partial                                                    | custom          |
| NA                | 4969           | Cytochrome c oxidase subunit 4 isoform 2 mitochondrial partial                | custom          |
| NA                | 4970           | WW domain-binding protein 2 partial                                           | custom          |
| NA                | 4971           | Histone deacetylase complex subunit SAP18 partial                             | custom          |
| NA                | 4972           | Ubiquitin carboxyl-terminal hydrolase isozyme L3 partial                      | custom          |
| 90446             | 4974           | Protein MAK16-like protein partial                                            | custom          |
| NA                | 4975           | Pancreatic alpha-amylase partial                                              | custom          |
| NA                | 4976           | hypothetical protein X975 08942 partial                                       | custom          |

Supplemental Table 3 – continued from previous page

| Arthropod Core ID | Spider Core ID | Putative Ortholog Description                                                   | Target Database |
|-------------------|----------------|---------------------------------------------------------------------------------|-----------------|
| 89698             | 4978           | NADH dehydrogenase [ubiquinone] flavoprotein 2 mitochondrial partial            | custom          |
| NA                | 4979           | Elongation factor Ts mitochondrial partial                                      | custom          |
| NA                | 4980           | C-factor partial                                                                | custom          |
| NA                | 4981           | Pituitary tumor-transforming 1 protein-interacting protein partial              | custom          |
| NA                | 4982           | Sulfotransferase 1C2 partial                                                    | custom          |
| 89842             | 4983           | PREDICTED: protein FRG1 homolog                                                 | nr              |
| NA                | 4984           | Myophilin partial                                                               | custom          |
| NA                | 4985           | F-actin-capping protein subunit beta partial                                    | custom          |
| NA                | 4986           | Cofilin/actin-depolymerizing factor-like protein partial                        | custom          |
| NA                | 4987           | PREDICTED: cytochrome c oxidase subunit 4 isoform 1, mitochondrial-like isoform | nr              |
| NA                | 4988           | hypothetical protein X975 05975 partial                                         | custom          |
| NA                | 4989           | Dihydropteridine reductase partial                                              | custom          |
| NA                | 4992           | Pleckstrin domain-containing family F member 2 partial                          | custom          |
| NA                | 4993           | Peptidyl-prolyl cis-trans isomerase partial                                     | custom          |
| NA                | 4994           | Serine/threonine-protein phosphatase 2A activator partial                       | custom          |
| 89740             | 4995           | hypothetical protein X975 11002 partial                                         | custom          |
| NA                | 4997           | 3-hydroxyisobutyryl-CoA hydrolase mitochondrial partial                         | custom          |
| NA                | 4998           | Negative elongation factor A partial                                            | custom          |

**Supplemental Table 3 – continued from previous page**

| <b>Arthropod Core ID</b> | <b>Spider Core ID</b> | <b>Putative Ortholog Description</b>                                | <b>Target Database</b> |
|--------------------------|-----------------------|---------------------------------------------------------------------|------------------------|
| NA                       | 4999                  | hypothetical protein X975 03197 partial                             | custom                 |
| 90546                    | 5001                  | Thioredoxin domain-containing protein 9 partial                     | custom                 |
| NA                       | 5004                  | hypothetical protein X975 00239 partial                             | custom                 |
| NA                       | 5005                  | hypothetical protein X975 06519 partial                             | custom                 |
| NA                       | 5006                  | hypothetical protein X975 26509 partial                             | custom                 |
| NA                       | 5008                  | ATP synthase subunit gamma mitochondrial partial                    | custom                 |
| NA                       | 5010                  | Serine/threonine-protein phosphatase PGAM5 mitochondrial partial    | custom                 |
| NA                       | 5015                  | Prothoracicostatic peptide partial                                  | custom                 |
| 89930                    | 5017                  | 26S protease regulatory subunit 4 partial                           | custom                 |
| 89650                    | 5022                  | LETM1 and EF-hand domain-containing protein 1 mitochondrial partial | custom                 |
| NA                       | 5024                  | Techylectin-5A partial                                              | custom                 |
| NA                       | 5025                  | hypothetical protein X975 14858 partial                             | custom                 |
| NA                       | 5026                  | CCAAT/enhancer-binding protein alpha partial                        | custom                 |
| NA                       | 5028                  | hypothetical protein X975 16815 partial                             | custom                 |
| NA                       | 5030                  | RNA 3'-terminal phosphate cyclase partial                           | custom                 |
| NA                       | 5039                  | DNA repair protein RAD50 partial                                    | custom                 |
| NA                       | 5041                  | Clotting factor B partial                                           | custom                 |
| NA                       | 5043                  | DNA polymerase epsilon subunit 3 partial                            | custom                 |
| 90495                    | 5048                  | tRNA (guanine(26)-N(2))-dimethyltransferase partial                 | custom                 |



**Supplemental Table 3 – continued from previous page**

| <b>Arthropod Core ID</b> | <b>Spider Core ID</b> | <b>Putative Ortholog Description</b>                         | <b>Target Database</b> |
|--------------------------|-----------------------|--------------------------------------------------------------|------------------------|
| NA                       | 5049                  | 39S ribosomal protein L9 mitochondrial partial               | custom                 |
| NA                       | 5051                  | XK-related protein 6 partial                                 | custom                 |
| NA                       | 5052                  | Translational activator of cytochrome c oxidase 1 partial    | custom                 |
| NA                       | 5053                  | Cysteine protease ATG4B partial                              | custom                 |
| NA                       | 5054                  | Endonuclease G mitochondrial partial                         | custom                 |
| NA                       | 5057                  | Ubiquitin-conjugating enzyme E2 G1 partial                   | custom                 |
| NA                       | 5059                  | Histone acetyltransferase KAT6B partial                      | custom                 |
| NA                       | 5061                  | CCR4-NOT transcription complex subunit 3 partial             | custom                 |
| NA                       | 5062                  | Eukaryotic translation initiation factor 3 subunit H partial | custom                 |
| NA                       | 5064                  | hypothetical protein X975 20518 partial                      | custom                 |
| NA                       | 5065                  | hypothetical protein X975 12238 partial                      | custom                 |
| NA                       | 5069                  | dCTP pyrophosphatase 1 partial                               | custom                 |
| 90148                    | 5070                  | L-xylulose reductase partial                                 | custom                 |
| NA                       | 5072                  | L-threonine 3-dehydrogenase partial                          | custom                 |
| NA                       | 5074                  | Peroxisomal membrane protein PEX16 partial                   | custom                 |
| NA                       | 5076                  | hypothetical protein X975 16156 partial                      | custom                 |
| 90285                    | 5077                  | V-type proton ATPase subunit D partial                       | custom                 |
| NA                       | 5078                  | 39S ribosomal protein L18 mitochondrial partial              | custom                 |
| NA                       | 5079                  | 39S ribosomal protein L28 mitochondrial partial              | custom                 |

Supplemental Table 3 – continued from previous page

| Arthropod Core ID | Spider Core ID | Putative Ortholog Description                                                  | Target Database |
|-------------------|----------------|--------------------------------------------------------------------------------|-----------------|
| NA                | 5082           | LIM domain-containing protein 1 partial                                        | custom          |
| NA                | 5085           | Ankyrin repeat domain-containing protein 40 partial                            | custom          |
| 89673             | 5086           | tRNA methyltransferase 112-like protein partial                                | custom          |
| NA                | 5087           | Nuclear transcription factor Y subunit gamma partial                           | custom          |
| NA                | 5091           | U11/U12 small nuclear ribonucleoprotein partial                                | custom          |
| NA                | 5092           | NADH dehydrogenase [ubiquinone] 1 beta subcomplex subunit 7 partial            | custom          |
| NA                | 5093           | Akirin partial                                                                 | custom          |
| NA                | 5094           | B-cell receptor-associated protein 31 partial                                  | custom          |
| 90119             | 5096           | Deoxyhypusine hydroxylase partial                                              | custom          |
| 89790             | 5099           | Transmembrane protein 104 partial                                              | custom          |
| NA                | 5103           | RNA exonuclease 1-like protein partial                                         | custom          |
| NA                | 5107           | Ninjurin-1 partial                                                             | custom          |
| NA                | 5109           | Alpha-parvin partial                                                           | custom          |
| NA                | 5110           | putative lysosomal cobalamin transporter partial                               | custom          |
| NA                | 5111           | Cell division cycle protein 123-like protein partial                           | custom          |
| NA                | 5112           | putative Dol-P-Man:Man(7)GlcNAc(2)-PP-Dol alpha-16-mannosyltransferase partial | custom          |
| NA                | 5116           | TATA box-binding protein-like protein 1 partial                                | custom          |
| NA                | 5119           | Cell growth-regulating nucleolar protein partial                               | custom          |

**Supplemental Table 3 – continued from previous page**

| <b>Arthropod Core ID</b> | <b>Spider Core ID</b> | <b>Putative Ortholog Description</b>                                           | <b>Target Database</b> |
|--------------------------|-----------------------|--------------------------------------------------------------------------------|------------------------|
| 89914                    | 5120                  | Enhancer of rudimentary-like protein partial                                   | custom                 |
| NA                       | 5121                  | hypothetical protein X975 23691 partial                                        | custom                 |
| 90128                    | 5123                  | RING finger protein 113A partial                                               | custom                 |
| NA                       | 5124                  | putative NADH dehydrogenase [ubiquinone] 1 alpha subcomplex subunit 12 partial | custom                 |
| NA                       | 5125                  | Nuclear nucleic acid-binding protein C1D partial                               | custom                 |
| NA                       | 5127                  | E2F-associated phosphoprotein partial                                          | custom                 |
| NA                       | 5128                  | 28S ribosomal protein S2 mitochondrial partial                                 | custom                 |
| NA                       | 5129                  | Proteasome subunit beta type-2 partial                                         | custom                 |
| NA                       | 5130                  | DCN1-like protein 3 partial                                                    | custom                 |
| NA                       | 5133                  | TGF-beta-activated kinase 1 and MAP3K7-binding protein 3 partial               | custom                 |
| 90158                    | 5137                  | Beta-lactamase-like protein 2 partial                                          | custom                 |
| NA                       | 5138                  | hypothetical protein X975 10248 partial                                        | custom                 |
| NA                       | 5140                  | Serine/arginine-rich splicing factor 12 partial                                | custom                 |
| NA                       | 5141                  | Glucosidase 2 subunit beta partial                                             | custom                 |
| NA                       | 5142                  | Transcriptional adapter 2-alpha partial                                        | custom                 |
| NA                       | 5147                  | Dehydrogenase/reductase SDR family member 7 partial                            | custom                 |
| NA                       | 5149                  | Pre-rRNA-processing protein TSR2-like protein partial                          | custom                 |

Supplemental Table 3 – continued from previous page

| Arthropod Core ID | Spider Core ID | Putative Ortholog Description                                           | Target Database |
|-------------------|----------------|-------------------------------------------------------------------------|-----------------|
| NA                | 5152           | Zinc finger protein 330-like protein partial                            | custom          |
| NA                | 5154           | RNA pseudouridylate synthase domain-containing protein 3 partial        | custom          |
| NA                | 5156           | hypothetical protein X975 22124 partial                                 | custom          |
| NA                | 5157           | Epsilon-sarcoglycan partial                                             | custom          |
| NA                | 5158           | Cytochrome b-c1 complex subunit Rieske mitochondrial partial            | custom          |
| NA                | 5159           | tRNA dimethylallyl-transferase mitochondrial partial                    | custom          |
| NA                | 5161           | 7SK snRNA methylphosphate capping enzyme partial                        | custom          |
| NA                | 5162           | GA-binding protein subunit beta-1 partial                               | custom          |
| NA                | 5163           | putative proline-tRNA ligase mitochondrial partial                      | custom          |
| NA                | 5166           | putative ATP-dependent RNA helicase DDX31 partial                       | custom          |
| NA                | 5167           | PREDICTED: glutamyl-tRNA(Gln) amidotransferase subunit C, mitochondrial | nr              |
| NA                | 5168           | Protein ECT2 partial                                                    | custom          |
| NA                | 5169           | EP300-interacting inhibitor of differentiation 3 partial                | custom          |
| NA                | 5176           | Zinc finger BED domain-containing protein 5 partial                     | custom          |
| NA                | 5180           | Ceramide synthase 6 partial                                             | custom          |
| NA                | 5181           | H/ACA ribonucleoprotein complex non-core subunit NAF1 partial           | custom          |

**Supplemental Table 3 – continued from previous page**

| <b>Arthropod Core ID</b> | <b>Spider Core ID</b> | <b>Putative Ortholog Description</b>                        | <b>Target Database</b> |
|--------------------------|-----------------------|-------------------------------------------------------------|------------------------|
| NA                       | 5187                  | Adrenodoxin mitochondrial partial                           | custom                 |
| 89972                    | 5188                  | Ribosome biogenesis protein bop1 partial                    | custom                 |
| NA                       | 5189                  | Peroxisome biogenesis factor 1 partial                      | custom                 |
| NA                       | 5190                  | Trans-aconitate 2-methyltransferase partial                 | custom                 |
| NA                       | 5191                  | Mitogen-activated protein kinase 1 partial                  | custom                 |
| NA                       | 5192                  | Peptidyl-prolyl cis-trans isomerase FKBP2 partial           | custom                 |
| 90216                    | 5193                  | Anaphase-promoting complex subunit 10 partial               | custom                 |
| NA                       | 5195                  | putative E3 ubiquitin-protein ligase MY-CBP2 partial        | custom                 |
| NA                       | 5198                  | hypothetical protein X975 21083 partial                     | custom                 |
| NA                       | 5199                  | Ras-related GTP-binding protein C partial                   | custom                 |
| NA                       | 5200                  | Pleckstrin domain-containing family B member 2 partial      | custom                 |
| NA                       | 5206                  | PREDICTED: Bardet-Biedl syndrome 10 protein isoform         | nr                     |
| NA                       | 5207                  | hypothetical protein X975 25400 partial                     | custom                 |
| NA                       | 5209                  | Geranylgeranyl transferase type-1 subunit beta partial      | custom                 |
| NA                       | 5210                  | tRNA wybutosine-synthesizing protein 3-like protein partial | custom                 |
| NA                       | 5213                  | PREDICTED: CBF1-interacting corepressor, putative           | nr                     |
| NA                       | 5217                  | Fas-binding factor 1-like protein partial                   | custom                 |
| NA                       | 5218                  | RPE-spondin partial                                         | custom                 |

Supplemental Table 3 – continued from previous page

| Arthropod Core ID | Spider Core ID | Putative Ortholog Description                                        | Target Database |
|-------------------|----------------|----------------------------------------------------------------------|-----------------|
| NA                | 5219           | Trimeric intracellular cation channel type B partial                 | custom          |
| 89839             | 5221           | Glutamyl-tRNA(Gln) amidotransferase subunit A mitochondrial partial  | custom          |
| NA                | 5223           | putative ribosomal RNA methyltransferase 1 partial                   | custom          |
| NA                | 5224           | Arginine/serine-rich protein PNISR partial                           | custom          |
| NA                | 5227           | Protein NipSnap-like protein 3A partial                              | custom          |
| NA                | 5228           | E3 ubiquitin-protein ligase RNF14 partial                            | custom          |
| NA                | 5230           | Dual specificity protein phosphatase 14 partial                      | custom          |
| NA                | 5231           | Programmed cell death protein 2 partial                              | custom          |
| NA                | 5233           | putative ankyrin repeat protein partial                              | custom          |
| 90086             | 5234           | 60S ribosomal protein L18a partial                                   | custom          |
| 90336             | 5236           | 12-dihydroxy-3-keto-5-methylthiopentene dioxygenase partial          | custom          |
| NA                | 5238           | Endoplasmic reticulum resident protein 29 partial                    | custom          |
| 90190             | 5240           | Proteasome subunit alpha type-5 partial                              | custom          |
| 90483             | 5244           | Protein pygopus partial                                              | custom          |
| NA                | 5247           | 5'-nucleotidase domain-containing protein 1                          | nr              |
| 90422             | 5248           | Protein unc-119-like protein partial                                 | custom          |
| NA                | 5250           | Transmembrane and coiled-coil domains protein 1 partial              | custom          |
| NA                | 5252           | Zinc finger CCCH-type with G patch domain-containing protein partial | custom          |

Supplemental Table 3 – continued from previous page

| Arthropod Core ID | Spider Core ID | Putative Ortholog Description                         | Target Database |
|-------------------|----------------|-------------------------------------------------------|-----------------|
| NA                | 5253           | Deubiquitinating protein partial                      | custom          |
| NA                | 5255           | Zinc finger protein 57 partial                        | custom          |
| NA                | 5256           | SET domain-containing protein 4 partial               | custom          |
| NA                | 5258           | Porphobilinogen deaminase partial                     | custom          |
| NA                | 5259           | Alkaline ceramidase partial                           | custom          |
| NA                | 5260           | Protein YIPF5 partial                                 | custom          |
| NA                | 5262           | Protein BUD31-like protein partial                    | custom          |
| 89680             | 5263           | 40S ribosomal protein S17 partial                     | custom          |
| NA                | 5265           | Ubiquitin-conjugating enzyme E2 G2 partial            | custom          |
| NA                | 5268           | Ras-related protein Rab-32 partial                    | custom          |
| 89735             | 5269           | hypothetical protein X975 26960 partial               | custom          |
| 90004             | 5270           | Enoyl-CoA hydratase mitochondrial partial             | custom          |
| NA                | 5271           | RNA methyltransferase-like protein 1 partial          | custom          |
| NA                | 5273           | Hypermethylated in cancer 2 protein partial           | custom          |
| 90563             | 5274           | N(6)-adenine-specific DNA methyltransferase 2 partial | custom          |
| NA                | 5275           | KDEL motif-containing protein 1 partial               | custom          |
| NA                | 5276           | hypothetical protein X975 23653 partial               | custom          |
| 89993             | 5277           | Proteasome subunit alpha type-2 partial               | custom          |
| NA                | 5278           | Adenylate kinase isoenzyme 1 partial                  | custom          |
| NA                | 5279           | 26S protease regulatory subunit 10B partial           | custom          |

Supplemental Table 3 – continued from previous page

| Arthropod Core ID | Spider Core ID | Putative Ortholog Description                                 | Target Database |
|-------------------|----------------|---------------------------------------------------------------|-----------------|
| NA                | 5280           | SH2B adapter protein 2 partial                                | custom          |
| NA                | 5282           | Tubulin-specific chaperone A partial                          | custom          |
| NA                | 5283           | Mediator of RNA polymerase II transcription subunit 6 partial | custom          |
| NA                | 5285           | Trophoblast glycoprotein partial                              | custom          |
| 90043             | 5288           | PREDICTED: WASH complex subunit CCDC53-like                   | nr              |
| NA                | 5290           | PHD finger protein 12 partial                                 | custom          |
| NA                | 5291           | Protein NipSnap partial                                       | custom          |
| NA                | 5292           | Rap1 GTPase-GDP dissociation stimulator 1 partial             | custom          |
| NA                | 5294           | PREDICTED: dr1-associated corepressor-like                    | nr              |
| NA                | 5301           | Breast cancer anti-estrogen resistance protein 1 partial      | custom          |
| NA                | 5302           | Centrosomal protein partial                                   | custom          |
| NA                | 5308           | Tubulin beta-1 chain partial                                  | custom          |
| 90238             | 5310           | putative methyltransferase WBSR22 partial                     | custom          |
| NA                | 5315           | Wiskott-Aldrich syndrome protein partial                      | custom          |
| NA                | 5316           | Neighbor of COX4 partial                                      | custom          |
| NA                | 5317           | Transmembrane protein 209 partial                             | custom          |
| NA                | 5320           | E3 ubiquitin-protein ligase MARCH1 partial                    | custom          |
| NA                | 5322           | 40S ribosomal protein S3-A partial                            | custom          |
| 89694             | 5323           | Zinc finger protein ZPR1 partial                              | custom          |
| NA                | 5324           | Vacuolar-sorting protein SNF8 partial                         | custom          |



**Supplemental Table 3 – continued from previous page**

| <b>Arthropod Core ID</b> | <b>Spider Core ID</b> | <b>Putative Ortholog Description</b>                              | <b>Target Database</b> |
|--------------------------|-----------------------|-------------------------------------------------------------------|------------------------|
| NA                       | 5327                  | Bromodomain-containing protein 7 partial                          | custom                 |
| NA                       | 5332                  | Mediator of RNA polymerase II transcription subunit 10 partial    | custom                 |
| NA                       | 5333                  | Zinc finger protein 252 partial                                   | custom                 |
| NA                       | 5335                  | MAGUK p55 sub-family member 5 partial                             | custom                 |
| NA                       | 5338                  | CTD small phosphatase-like protein partial                        | custom                 |
| NA                       | 5343                  | Serine/threonine-protein kinase ULK3 partial                      | custom                 |
| NA                       | 5346                  | Transmembrane protein adipocyte-associated 1-like protein partial | custom                 |
| 89689                    | 5347                  | RNA and export factor-binding protein 2 partial                   | custom                 |
| NA                       | 5349                  | Transmembrane emp24 domain-containing protein 1 partial           | custom                 |
| NA                       | 5352                  | D-aspartate oxidase partial                                       | custom                 |
| NA                       | 5354                  | Transmembrane protein partial                                     | custom                 |
| NA                       | 5356                  | Ectopic P granules protein 5-like protein partial                 | custom                 |
| NA                       | 5359                  | Mannose-6-phosphate isomerase partial                             | custom                 |
| NA                       | 5360                  | PP2C-like domain-containing protein partial                       | custom                 |
| NA                       | 5361                  | GTP-binding protein 128up partial                                 | custom                 |
| NA                       | 5365                  | Glycogenin-1 partial                                              | custom                 |
| NA                       | 5366                  | hypothetical protein X975 05332 partial                           | custom                 |

Supplemental Table 3 – continued from previous page

| Arthropod Core ID | Spider Core ID | Putative Ortholog Description                                    | Target Database |
|-------------------|----------------|------------------------------------------------------------------|-----------------|
| NA                | 5367           | hypothetical protein X975 06366 partial                          | custom          |
| NA                | 5374           | Charged multivesicular body protein 7 partial                    | custom          |
| NA                | 5375           | Synaptobrevin partial                                            | custom          |
| NA                | 5376           | Autophagy-related protein 9A partial                             | custom          |
| NA                | 5378           | Charged multivesicular body protein 5 partial                    | custom          |
| NA                | 5380           | RING finger protein 17 partial                                   | custom          |
| NA                | 5381           | Protein MEMO1 partial                                            | custom          |
| 89944             | 5382           | Inositol oxygenase partial                                       | custom          |
| NA                | 5384           | Kelch-like protein 18 partial                                    | custom          |
| NA                | 5387           | MKL/myocardin-like protein 2 partial                             | custom          |
| NA                | 5396           | hypothetical protein X975 04874 partial                          | custom          |
| 89965             | 5397           | 40S ribosomal protein S9 partial                                 | custom          |
| NA                | 5400           | ATP synthase subunit delta mitochondrial partial                 | custom          |
| NA                | 5402           | Tubulin-specific chaperone E partial                             | custom          |
| NA                | 5407           | Nicotinate-nucleotide pyrophosphorylase [carboxylating] partial  | custom          |
| NA                | 5408           | Ribosomal RNA small subunit methyltransferase NEP1 partial       | custom          |
| NA                | 5409           | Tetratricopeptide repeat protein 1 partial                       | custom          |
| NA                | 5410           | PREDICTED: tubulin polyglutamylase complex subunit-2like isoform | nr              |
| NA                | 5411           | CCR4-NOT transcription complex subunit 10 partial                | custom          |

**Supplemental Table 3 – continued from previous page**

| <b>Arthropod Core ID</b> | <b>Spider Core ID</b> | <b>Putative Ortholog Description</b>                    | <b>Target Database</b> |
|--------------------------|-----------------------|---------------------------------------------------------|------------------------|
| NA                       | 5412                  | Histone-lysine N-methyltransferase setd3 partial        | custom                 |
| NA                       | 5413                  | COMM domain-containing protein 2 partial                | custom                 |
| NA                       | 5417                  | Transmembrane emp24 domain-containing protein 6 partial | custom                 |
| NA                       | 5418                  | Protein FAM149B1 partial                                | custom                 |
| NA                       | 5419                  | Methionine aminopeptidase 1 partial                     | custom                 |
| NA                       | 5423                  | Transmembrane protein 41B partial                       | custom                 |
| NA                       | 5424                  | Tetraspanin-7 partial                                   | custom                 |
| 89920                    | 5426                  | Adenosylhomocysteinase A partial                        | custom                 |
| NA                       | 5430                  | UNC93-like protein MFSD11 partial                       | custom                 |
| 90550                    | 5453                  | Ubiquitin-conjugating enzyme E2 variant 2 partial       | custom                 |
| 89836                    | 5459                  | Alpha-methylacyl-CoA racemase partial                   | custom                 |
| NA                       | 5460                  | Noelin partial                                          | custom                 |
| NA                       | 5461                  | Peptidyl-prolyl cis-trans isomerase H partial           | custom                 |
| NA                       | 5463                  | hypothetical protein X975 12721 partial                 | custom                 |
| NA                       | 5465                  | SH3 domain-containing kinase-binding protein 1 partial  | custom                 |
| NA                       | 5468                  | PAX-interacting protein 1 partial                       | custom                 |
| 89819                    | 5476                  | Selenocysteine methyltransferase partial                | custom                 |
| NA                       | 5477                  | Importin subunit alpha-2 partial                        | custom                 |
| NA                       | 5478                  | U11/U12 small nuclear ribonucleoprotein partial         | custom                 |

Supplemental Table 3 – continued from previous page

| Arthropod Core ID | Spider Core ID | Putative Ortholog Description                                       | Target Database |
|-------------------|----------------|---------------------------------------------------------------------|-----------------|
| NA                | 5484           | U3 small nucleolar RNA-associated protein 6-like protein partial    | custom          |
| NA                | 5486           | Methyltransferase-like protein 10 partial                           | custom          |
| NA                | 5487           | Coiled-coil domain-containing protein 115 partial                   | custom          |
| NA                | 5489           | Neutralized-like protein 2 partial                                  | custom          |
| NA                | 5492           | Lamin Dm0 partial                                                   | custom          |
| NA                | 5494           | PREDICTED: DNA polymerase epsilon subunit 4-like                    | nr              |
| NA                | 5495           | WD and tetratricopeptide repeats protein 1 partial                  | custom          |
| NA                | 5496           | PC4 and SFRS1-interacting protein partial                           | custom          |
| NA                | 5497           | Aprataxin and PNK-like factor partial                               | custom          |
| 90269             | 5499           | hypothetical protein X975 22271 partial                             | custom          |
| NA                | 5500           | Inhibitor of growth protein 1 partial                               | custom          |
| NA                | 5501           | hypothetical protein X975 21918 partial                             | custom          |
| 90183             | 5503           | 40S ribosomal protein S7 partial                                    | custom          |
| 90496             | 5504           | hypothetical protein X975 15266 partial                             | custom          |
| NA                | 5506           | Glutathione S-transferase 1 isoform C partial                       | custom          |
| NA                | 5507           | Breast cancer metastasis-suppressor 1-like protein-A partial        | custom          |
| NA                | 5508           | CDGSH iron-sulfur domain-containing protein 3 mitochondrial partial | custom          |
| NA                | 5509           | E3 ubiquitin-protein ligase RING2-A partial                         | custom          |

Supplemental Table 3 – continued from previous page

| Arthropod Core ID | Spider Core ID | Putative Ortholog Description                                                 | Target Database |
|-------------------|----------------|-------------------------------------------------------------------------------|-----------------|
| NA                | 5510           | Methionine aminopeptidase 1D mitochondrial partial                            | custom          |
| NA                | 5511           | Protein FAM32A partial                                                        | custom          |
| NA                | 5512           | DNA-directed RNA polymerase III subunit RPC9 partial                          | custom          |
| 90220             | 5514           | hypothetical protein X975 14274 partial                                       | custom          |
| NA                | 5515           | putative ATP-dependent Clp protease proteolytic subunit mitochondrial partial | custom          |
| 89982             | 5516           | Troponin C partial                                                            | custom          |
| 90631             | 5517           | ribosomal protein S26, putative                                               | nr              |
| NA                | 5518           | Calmodulin partial                                                            | custom          |
| NA                | 5519           | Monoacylglycerol lipase ABHD12 partial                                        | custom          |
| NA                | 5520           | Tetraspanin-31 partial                                                        | custom          |
| NA                | 5523           | Rho guanine nucleotide exchange factor 7 partial                              | custom          |
| NA                | 5524           | Protein deltex-2 partial                                                      | custom          |
| NA                | 5525           | Proteasome assembly chaperone 4                                               | nr              |
| NA                | 5526           | putative proline dehydrogenase 2 partial                                      | custom          |
| NA                | 5527           | DCC-interacting protein 13-alpha partial                                      | custom          |
| NA                | 5529           | Arginine and glutamate-rich protein 1-A partial                               | custom          |
| NA                | 5530           | Sodium/potassium/calcium exchanger 5 partial                                  | custom          |
| NA                | 5531           | 3'-5' exoribonuclease 1 partial                                               | custom          |
| NA                | 5532           | WD repeat-containing protein 89 partial                                       | custom          |
| 89810             | 5536           | Sister chromatid cohesion protein DCC1 partial                                | custom          |

**Supplemental Table 3 – continued from previous page**

| <b>Arthropod Core ID</b> | <b>Spider Core ID</b> | <b>Putative Ortholog Description</b>                                | <b>Target Database</b> |
|--------------------------|-----------------------|---------------------------------------------------------------------|------------------------|
| NA                       | 5537                  | hypothetical protein X975 06272 partial                             | custom                 |
| NA                       | 5538                  | Transforming protein v-Fos/v-Fox partial                            | custom                 |
| NA                       | 5539                  | Protein dopey-1 partial                                             | custom                 |
| NA                       | 5540                  | GDP-Man:Man(3)GlcNAc(2)-PP-Dol alpha-12-mannosyltransferase partial | custom                 |
| NA                       | 5543                  | hypothetical protein X975 16083 partial                             | custom                 |
| 89709                    | 5545                  | Inosine triphosphate pyrophosphatase partial                        | custom                 |
| 90284                    | 5547                  | 40S ribosomal protein S18 partial                                   | custom                 |
| NA                       | 5552                  | Protein lin-52-like protein partial                                 | custom                 |
| NA                       | 5553                  | Acid sphingomyelinase-like phosphodiesterase 3b partial             | custom                 |
| NA                       | 5554                  | Ubiquitin carboxyl-terminal hydrolase 40 partial                    | custom                 |
| 89705                    | 5555                  | Replication factor C subunit 4 partial                              | custom                 |
| NA                       | 5557                  | Muscle-specific protein 20 partial                                  | custom                 |
| NA                       | 5558                  | Mediator of RNA polymerase II transcription subunit 8 partial       | custom                 |
| 90039                    | 5559                  | 60S ribosomal protein L17 partial                                   | custom                 |
| NA                       | 5560                  | Myosin regulatory light polypeptide 9 partial                       | custom                 |
| NA                       | 5562                  | Leucine-rich repeat-containing protein 20 partial                   | custom                 |
| NA                       | 5563                  | Protein canopy-like protein partial                                 | custom                 |
| NA                       | 5564                  | DNA-directed RNA polymerase II subunit RPB11 partial                | custom                 |

**Supplemental Table 3 – continued from previous page**

| <b>Arthropod Core ID</b> | <b>Spider Core ID</b> | <b>Putative Ortholog Description</b>                                   | <b>Target Database</b> |
|--------------------------|-----------------------|------------------------------------------------------------------------|------------------------|
| NA                       | 5565                  | Synaptic vesicle membrane protein VAT-1-like protein partial           | custom                 |
| NA                       | 5566                  | Zinc finger protein DPF3 partial                                       | custom                 |
| NA                       | 5568                  | Phospholipase A2 partial                                               | custom                 |
| NA                       | 5569                  | Baculoviral IAP repeat-containing protein 7-A partial                  | custom                 |
| 90630                    | 5570                  | Glutaredoxin-related protein 5 mitochondrial partial                   | custom                 |
| NA                       | 5572                  | Transcription factor AP-1 partial                                      | custom                 |
| NA                       | 5573                  | hypothetical protein X975 05022 partial                                | custom                 |
| NA                       | 5574                  | Krüppel-like factor 5 partial                                          | custom                 |
| NA                       | 5577                  | hypothetical protein X975 21174 partial                                | custom                 |
| NA                       | 5578                  | NA                                                                     | nr                     |
| NA                       | 5579                  | U24-ctenitoxin-Pn1a partial                                            | custom                 |
| NA                       | 5581                  | 40S ribosomal protein S4 partial                                       | custom                 |
| NA                       | 5582                  | Cysteine dioxygenase type 1 partial                                    | custom                 |
| NA                       | 5584                  | Tumor protein D54 partial                                              | custom                 |
| NA                       | 5585                  | hypothetical protein X975 19303 partial                                | custom                 |
| NA                       | 5586                  | Transcription factor HES-4-A partial                                   | custom                 |
| NA                       | 5587                  | Ras-related protein Rab-6A partial                                     | custom                 |
| NA                       | 5589                  | Tyrosine-protein phosphatase Lar partial                               | custom                 |
| NA                       | 5590                  | Troponin C partial                                                     | custom                 |
| 90064                    | 5591                  | Troponin T partial                                                     | custom                 |
| NA                       | 5593                  | Deoxyuridine 5'-triphosphate nucleotidohydrolase mitochondrial partial | custom                 |

Supplemental Table 3 – continued from previous page

| Arthropod Core ID | Spider Core ID | Putative Ortholog Description                                                      | Target Database |
|-------------------|----------------|------------------------------------------------------------------------------------|-----------------|
| NA                | 5595           | H/ACA ribonucleo-protein complex sub-unit 2-like protein partial                   | custom          |
| NA                | 5596           | Electron transfer flavoprotein subunit alpha mitochondrial partial                 | custom          |
| NA                | 5597           | putative Bax inhibitor 1 partial                                                   | custom          |
| NA                | 5599           | Structural maintenance of chromosomes protein 2 partial                            | custom          |
| NA                | 5600           | hypothetical protein X975 22155 partial                                            | custom          |
| NA                | 5601           | THO complex sub-unit 6-like protein partial                                        | custom          |
| 89682             | 5602           | Alanine aminotransferase 2 partial                                                 | custom          |
| NA                | 5603           | Vacuolar protein sorting-associated protein VTA1-like protein partial              | custom          |
| 89743             | 5605           | NADH dehydrogenase [ubiquinone] 1 beta subcomplex sub-unit 5 mitochondrial partial | custom          |
| 90149             | 5607           | Peptidyl-prolyl cis-trans isomerase FKBP4 partial                                  | custom          |
| NA                | 5610           | Peritrophin-1 partial                                                              | custom          |
| NA                | 5611           | Multiple coagulation factor deficiency protein 2-like protein partial              | custom          |
| NA                | 5612           | Tyrosine kinase receptor Cad96Ca partial                                           | custom          |
| NA                | 5614           | Syntenin-1 partial                                                                 | custom          |
| 90100             | 5615           | Histone H1 partial                                                                 | custom          |
| NA                | 5616           | Serine/threonine-protein kinase H1-like protein partial                            | custom          |



Supplemental Table 3 – continued from previous page

| Arthropod Core ID | Spider Core ID | Putative Ortholog Description                        | Target Database |
|-------------------|----------------|------------------------------------------------------|-----------------|
| NA                | 5619           | FGFR1 oncogene partner 2-like protein partial        | custom          |
| NA                | 5620           | Replication factor C subunit 2 partial               | custom          |
| 90473             | 5629           | Nuclease-sensitive element-binding protein 1 partial | custom          |
| NA                | 5631           | TBC1 domain family member 15 partial                 | custom          |
| NA                | 5632           | hypothetical protein X975 07405 partial              | custom          |
| NA                | 5634           | hypothetical protein X975 11098 partial              | custom          |
| NA                | 5636           | Histone acetyltransferase KAT6B partial              | custom          |
| 90651             | 5637           | Mechanosensory protein 2 partial                     | custom          |
| NA                | 5641           | Histone-lysine N-methyltransferase MLL3 partial      | custom          |
| 89722             | 5642           | 60S ribosomal protein L26 partial                    | custom          |
| NA                | 5643           | WD repeat-containing protein 3 partial               | custom          |
| NA                | 5644           | BRCA1-A complex subunit BRE partial                  | custom          |
| NA                | 5648           | Ufm1-specific protease 2 partial                     | custom          |
| NA                | 5649           | G patch domain-containing protein 3 partial          | custom          |
| NA                | 5651           | Transmembrane protein 47 partial                     | custom          |
| NA                | 5653           | Cuticle protein 10.9 partial                         | custom          |
| NA                | 5654           | CCR4-NOT transcription complex subunit 3 partial     | custom          |
| NA                | 5658           | E3 ubiquitin-protein ligase listerin partial         | custom          |
| NA                | 5659           | NAD-dependent deacetylase sirtuin-7 partial          | custom          |
| NA                | 5660           | 39S ribosomal protein L17 mitochondrial partial      | custom          |

**Supplemental Table 3 – continued from previous page**

| <b>Arthropod Core ID</b> | <b>Spider Core ID</b> | <b>Putative Ortholog Description</b>                                                 | <b>Target Database</b> |
|--------------------------|-----------------------|--------------------------------------------------------------------------------------|------------------------|
| NA                       | 5661                  | 60S ribosomal protein L11 partial                                                    | custom                 |
| NA                       | 5664                  | Ubiquitin-conjugating enzyme E2 S partial                                            | custom                 |
| NA                       | 5667                  | STE20-related kinase adapter protein alpha partial                                   | custom                 |
| NA                       | 5668                  | Coronin-6 partial                                                                    | custom                 |
| NA                       | 5671                  | Phosphatidylinositol-4-phosphate 3-kinase C2 domain-containing subunit alpha partial | custom                 |
| NA                       | 5674                  | RNA polymerase II subunit A C-terminal domain phosphatase SSU72 partial              | custom                 |
| NA                       | 5675                  | Ribosome production factor 2-like protein partial                                    | custom                 |
| NA                       | 5676                  | Activating signal cointegrator 1 complex subunit 1 partial                           | custom                 |
| 89678                    | 5677                  | STIP1 and U box-containing protein 1 partial                                         | custom                 |
| NA                       | 5680                  | hypothetical protein X975 02230 partial                                              | custom                 |
| NA                       | 5681                  | Eukaryotic translation initiation factor 4E type 2 partial                           | custom                 |
| NA                       | 5683                  | WD repeat-containing protein 24 partial                                              | custom                 |
| NA                       | 5685                  | Cysteine and histidine-rich protein 1-B partial                                      | custom                 |
| NA                       | 5686                  | Calcium-independent phospholipase A2-gamma partial                                   | custom                 |
| NA                       | 5687                  | Cirhin-like                                                                          | nr                     |
| NA                       | 5688                  | Synaptobrevin-like protein YKT6 partial                                              | custom                 |
| NA                       | 5689                  | hypothetical protein X975 17624 partial                                              | custom                 |

**Supplemental Table 3 – continued from previous page**

| <b>Arthropod Core ID</b> | <b>Spider Core ID</b> | <b>Putative Ortholog Description</b>                                  | <b>Target Database</b> |
|--------------------------|-----------------------|-----------------------------------------------------------------------|------------------------|
| NA                       | 5690                  | Ubiquitin-conjugating enzyme E2 J2 partial                            | custom                 |
| NA                       | 5694                  | NADH dehydrogenase [ubiquinone] 1 alpha subcomplex subunit 11 partial | custom                 |
| NA                       | 5696                  | Kanadaplin partial                                                    | custom                 |
| NA                       | 5698                  | Hematopoietic prostaglandin D synthase partial                        | custom                 |
| NA                       | 5701                  | Protein pelota partial                                                | custom                 |
| NA                       | 5704                  | 60S ribosomal protein L27 partial                                     | custom                 |
| NA                       | 5705                  | Integrator complex subunit 10 partial                                 | custom                 |
| NA                       | 5715                  | Adrenodoxin mitochondrial partial                                     | custom                 |
| 89825                    | 5716                  | Ribosome biogenesis protein NSA2-like protein partial                 | custom                 |
| NA                       | 5717                  | tRNA wybutosine-synthesizing protein 5 partial                        | custom                 |
| NA                       | 5718                  | Regucalcin partial                                                    | custom                 |
| NA                       | 5719                  | Transmembrane emp24 domain-containing protein eca partial             | custom                 |
| 90276                    | 5720                  | NADH dehydrogenase [ubiquinone] 1 beta subcomplex subunit 10 partial  | custom                 |
| 89981                    | 5721                  | U6 snRNA-associated Sm-like protein LSm1 partial                      | custom                 |
| NA                       | 5724                  | 39S ribosomal protein L51 mitochondrial partial                       | custom                 |
| NA                       | 5725                  | Fanconi anemia-associated protein partial                             | custom                 |
| 89649                    | 5726                  | hypothetical protein X975 20170 partial                               | custom                 |
| NA                       | 5727                  | hypothetical protein X975 00999 partial                               | custom                 |

**Supplemental Table 3 – continued from previous page**

| <b>Arthropod Core ID</b> | <b>Spider Core ID</b> | <b>Putative Ortholog Description</b>                              | <b>Target Database</b> |
|--------------------------|-----------------------|-------------------------------------------------------------------|------------------------|
| NA                       | 5728                  | Iron-sulfur cluster assembly 1-like protein mitochondrial partial | custom                 |
| NA                       | 5729                  | hypothetical protein X975 19674 partial                           | custom                 |
| NA                       | 5732                  | Alpha-13/16-mannosyltransferase ALG2 partial                      | custom                 |
| NA                       | 5735                  | hypothetical protein X975 13488 partial                           | custom                 |
| NA                       | 5737                  | Cytoplasmic tRNA 2-thiolation protein 1 partial                   | custom                 |
| NA                       | 5740                  | putative proline racemase partial                                 | custom                 |
| NA                       | 5741                  | Omega-amidase NIT2 partial                                        | custom                 |
| NA                       | 5742                  | hypothetical protein X975 10040 partial                           | custom                 |
| NA                       | 5744                  | UMP-CMP kinase partial                                            | custom                 |
| NA                       | 5745                  | Spartin partial                                                   | custom                 |
| NA                       | 5746                  | Oxidoreductase NAD-binding domain-containing protein 1 partial    | custom                 |
| NA                       | 5747                  | RNA 3'-terminal phosphate cyclase-like protein partial            | custom                 |
| NA                       | 5749                  | Box C/D snoRNA protein 1 partial                                  | custom                 |
| 90241                    | 5750                  | ATP-dependent RNA helicase DDX55 partial                          | custom                 |
| NA                       | 5752                  | PDZ and LIM domain protein Zasp partial                           | custom                 |
| NA                       | 5754                  | Integrin-alpha FG-GAP repeat-containing protein 2 partial         | custom                 |
| NA                       | 5755                  | hypothetical protein X975 11890 partial                           | custom                 |
| NA                       | 5759                  | hypothetical protein X975 23326 partial                           | custom                 |
| NA                       | 5760                  | hypothetical protein X975 12087 partial                           | custom                 |

**Supplemental Table 3 – continued from previous page**

| <b>Arthropod Core ID</b> | <b>Spider Core ID</b> | <b>Putative Ortholog Description</b>                                | <b>Target Database</b> |
|--------------------------|-----------------------|---------------------------------------------------------------------|------------------------|
| NA                       | 5761                  | Heterogeneous nuclear ribonucleo-protein U-like protein 1 partial   | custom                 |
| NA                       | 5762                  | hypothetical protein X975 25792 partial                             | custom                 |
| NA                       | 5763                  | Phosphoacetylglucosamine mutase partial                             | custom                 |
| NA                       | 5764                  | hypothetical protein X975 05751 partial                             | custom                 |
| NA                       | 5765                  | hypothetical protein X975 09706 partial                             | custom                 |
| NA                       | 5766                  | BCL-6 corepressor partial                                           | custom                 |
| NA                       | 5770                  | Thioredoxin reductase 1 cytoplasmic partial                         | custom                 |
| NA                       | 5771                  | Programmed cell death protein 6 partial                             | custom                 |
| NA                       | 5774                  | Fatty acid synthase partial                                         | custom                 |
| NA                       | 5776                  | putative tRNA pseudouridine synthase Pus10 partial                  | custom                 |
| NA                       | 5781                  | PREDICTED: golgin subfamily A member 7-like                         | nr                     |
| NA                       | 5782                  | putative RNA polymerase II subunit B1 CTD phosphatase rpap2 partial | custom                 |
| NA                       | 5783                  | hypothetical protein X975 18250 partial                             | custom                 |
| NA                       | 5786                  | Transmembrane protein 242 partial                                   | custom                 |
| NA                       | 5787                  | Integrator complex subunit 8 partial                                | custom                 |
| NA                       | 5788                  | Sentrin-specific protease 7 partial                                 | custom                 |
| NA                       | 5795                  | Cell cycle checkpoint control protein RAD9A partial                 | custom                 |
| NA                       | 5796                  | RILP-like protein-like protein partial                              | custom                 |
| NA                       | 5799                  | Ribosomal RNA processing protein 36-like protein partial            | custom                 |

**Supplemental Table 3 – continued from previous page**

| <b>Arthropod Core ID</b> | <b>Spider Core ID</b> | <b>Putative Ortholog Description</b>                            | <b>Target Database</b> |
|--------------------------|-----------------------|-----------------------------------------------------------------|------------------------|
| NA                       | 5805                  | hypothetical protein X975 05627 partial                         | custom                 |
| NA                       | 5810                  | Neuroblastoma-amplified sequence partial                        | custom                 |
| NA                       | 5813                  | Nischarin partial                                               | custom                 |
| NA                       | 5814                  | hypothetical protein X975 18101 partial                         | custom                 |
| NA                       | 5815                  | ADP-ribosylation factor-like protein 1 partial                  | custom                 |
| NA                       | 5817                  | Protein FAM210A partial                                         | custom                 |
| NA                       | 5818                  | putative family 31 glucosidase partial                          | custom                 |
| 90266                    | 5819                  | Receptor expression-enhancing protein 5 partial                 | custom                 |
| NA                       | 5822                  | Tetratricopeptide repeat protein 32 partial                     | custom                 |
| NA                       | 5823                  | hypothetical protein X975 10817 partial                         | custom                 |
| NA                       | 5824                  | Sphingomyelin phosphodiesterase D SpeSicTox-beta1B2a partial    | custom                 |
| NA                       | 5827                  | Protein FAM43A partial                                          | custom                 |
| NA                       | 5828                  | Exosome complex component RRP46 partial                         | custom                 |
| NA                       | 5829                  | 39S ribosomal protein L42 mitochondrial partial                 | custom                 |
| NA                       | 5830                  | Spermatogenesis-defective protein 39-like protein partial       | custom                 |
| NA                       | 5831                  | Signal recognition particle protein partial                     | custom                 |
| 90089                    | 5833                  | ATP synthase mitochondrial F1 complex assembly factor 2 partial | custom                 |
| NA                       | 5834                  | hypothetical protein X975 19386 partial                         | custom                 |
| NA                       | 5836                  | Multifunctional protein ADE2 partial                            | custom                 |

**Supplemental Table 3 – continued from previous page**

| <b>Arthropod Core ID</b> | <b>Spider Core ID</b> | <b>Putative Ortholog Description</b>                                 | <b>Target Database</b> |
|--------------------------|-----------------------|----------------------------------------------------------------------|------------------------|
| 90654                    | 5839                  | Pyrroline-5-carboxylate reductase 2 partial                          | custom                 |
| NA                       | 5841                  | hypothetical protein X975 26581 partial                              | custom                 |
| NA                       | 5845                  | Mitochondrial fission factor partial                                 | custom                 |
| NA                       | 5846                  | hypothetical protein X975 12332 partial                              | custom                 |
| NA                       | 5847                  | Protein FAM50-like protein partial                                   | custom                 |
| NA                       | 5848                  | PREDICTED: enkurin domain-containing protein 1-like                  | nr                     |
| NA                       | 5849                  | Enoyl-CoA delta isomerase 1 mitochondrial partial                    | custom                 |
| NA                       | 5850                  | Nuclear pore complex protein Nup88 partial                           | custom                 |
| NA                       | 5851                  | Ubiquitin carboxyl-terminal hydrolase 22-A partial                   | custom                 |
| NA                       | 5852                  | Succinyl-CoA ligase [GDP-forming] subunit beta mitochondrial partial | custom                 |
| NA                       | 5854                  | MIT domain-containing protein 1 partial                              | custom                 |
| NA                       | 5855                  | Tubulin-specific chaperone A partial                                 | custom                 |
| NA                       | 5856                  | Hexosaminidase D partial                                             | custom                 |
| NA                       | 5857                  | Peptidoglycan-recognition protein SC2 partial                        | custom                 |
| NA                       | 5859                  | Slowpoke-binding protein partial                                     | custom                 |
| NA                       | 5860                  | hypothetical protein X975 04608 partial                              | custom                 |
| 90591                    | 5861                  | tRNA-dihydrouridine(16/17) synthase [NAD(P)(+)]-like protein partial | custom                 |

Supplemental Table 3 – continued from previous page

| Arthropod Core ID | Spider Core ID | Putative Ortholog Description                                                   | Target Database |
|-------------------|----------------|---------------------------------------------------------------------------------|-----------------|
| 89787             | 5862           | Protein transport protein Sec61 subunit alpha isoform 2 partial                 | custom          |
| NA                | 5864           | Methenyltetrahydrofolate synthase domain-containing protein partial             | custom          |
| 89715             | 5865           | Translation factor GUF1-like protein mitochondrial partial                      | custom          |
| NA                | 5866           | tRNA (guanine(10)-N2)-methyltransferase-like protein partial                    | custom          |
| NA                | 5868           | J domain-containing protein partial                                             | custom          |
| NA                | 5869           | PREDICTED: general transcription factor 3C polypeptide 2-like                   | nr              |
| NA                | 5870           | Docking protein 6 partial                                                       | custom          |
| 89974             | 5871           | CTD nuclear envelope phosphatase 1A partial                                     | custom          |
| NA                | 5872           | Thioredoxin domain-containing protein 17 partial                                | custom          |
| NA                | 5876           | PREDICTED: PRKR-interacting protein 1 homolog                                   | nr              |
| NA                | 5878           | Isocitrate dehydrogenase [NAD] subunit gamma 1 mitochondrial partial            | custom          |
| NA                | 5879           | E3 ubiquitin-protein ligase HUWE1 partial                                       | custom          |
| NA                | 5880           | LysM and hypothetical peptidoglycan-binding domain-containing protein 2 partial | custom          |
| NA                | 5881           | Multidrug resistance protein 1B partial                                         | custom          |
| NA                | 5885           | Intraflagellar transport protein 20-like protein partial                        | custom          |



Supplemental Table 3 – continued from previous page

| Arthropod Core ID | Spider Core ID | Putative Ortholog Description                                               | Target Database |
|-------------------|----------------|-----------------------------------------------------------------------------|-----------------|
| 90355             | 5887           | Beta-soluble NSF attachment protein partial                                 | custom          |
| NA                | 5890           | Phosphopantothenoylcysteine decarboxylase partial                           | custom          |
| NA                | 5891           | PREDICTED: anaphase-promoting complex subunit 15-like                       | nr              |
| NA                | 5893           | COMM domain-containing protein 3 partial                                    | custom          |
| NA                | 5894           | HEAT repeat-containing protein 6 partial                                    | custom          |
| 89818             | 5895           | GPN-loop GTPase 2 partial                                                   | custom          |
| 90052             | 5896           | 39S ribosomal protein L41 mitochondrial partial                             | custom          |
| NA                | 5897           | Clarin-3 partial                                                            | custom          |
| NA                | 5898           | Solute carrier family 25 member 46 partial                                  | custom          |
| NA                | 5899           | Ankyrin repeat and SOCS box protein 13 partial                              | custom          |
| NA                | 5903           | PREDICTED: DENN domain-containing protein 1A-like                           | nr              |
| NA                | 5905           | putative complex I intermediate-associated protein 30 mitochondrial partial | custom          |
| 90357             | 5906           | Superoxide dismutase [Cu-Zn] partial                                        | custom          |
| NA                | 5907           | AP-2 complex subunit mu partial                                             | custom          |
| NA                | 5909           | hypothetical protein X975 24298 partial                                     | custom          |
| NA                | 5912           | TBC1 domain family member 7 partial                                         | custom          |
| 90583             | 5914           | putative 28S ribosomal protein S25 mitochondrial partial                    | custom          |
| NA                | 5916           | Protein enabled partial                                                     | custom          |

**Supplemental Table 3 – continued from previous page**

| <b>Arthropod Core ID</b> | <b>Spider Core ID</b> | <b>Putative Ortholog Description</b>                             | <b>Target Database</b> |
|--------------------------|-----------------------|------------------------------------------------------------------|------------------------|
| NA                       | 5917                  | Ribosome-recycling factor mitochondrial partial                  | custom                 |
| NA                       | 5920                  | hypothetical protein X975 12776 partial                          | custom                 |
| NA                       | 5925                  | Sulfotransferase 4A1 partial                                     | custom                 |
| NA                       | 5926                  | CD9 antigen partial                                              | custom                 |
| NA                       | 5928                  | hypothetical protein X975 19454 partial                          | custom                 |
| NA                       | 5931                  | DnaJ-like protein sub-family C member 1 partial                  | custom                 |
| 90423                    | 5932                  | Ubiquitin fusion degradation protein 1-like protein partial      | custom                 |
| NA                       | 5936                  | Mid1-interacting protein 1-B partial                             | custom                 |
| NA                       | 5937                  | hypothetical protein X975 24825 partial                          | custom                 |
| NA                       | 5938                  | Low molecular weight phosphotyrosine protein phosphatase partial | custom                 |
| 90156                    | 5939                  | hypothetical protein X975 22176 partial                          | custom                 |
| NA                       | 5941                  | Lambda-crystallin-like protein partial                           | custom                 |
| NA                       | 5944                  | Neural-cadherin partial                                          | custom                 |
| NA                       | 5948                  | Flotillin-1 partial                                              | custom                 |
| NA                       | 5949                  | NA                                                               | nr                     |
| 89806                    | 5951                  | Translocon-associated protein subunit gamma partial              | custom                 |
| NA                       | 5956                  | Nucleoside diphosphate kinase-like protein partial               | custom                 |
| NA                       | 5963                  | hypothetical protein X975 17104 partial                          | custom                 |
| NA                       | 5968                  | Cell cycle control protein 50A partial                           | custom                 |
| NA                       | 5973                  | Casein kinase I isoform epsilon partial                          | custom                 |

Supplemental Table 3 – continued from previous page

| Arthropod Core ID | Spider Core ID | Putative Ortholog Description                                               | Target Database |
|-------------------|----------------|-----------------------------------------------------------------------------|-----------------|
| 90488             | 5974           | putative ATP-dependent RNA helicase DDX43 partial                           | custom          |
| NA                | 5978           | hypothetical protein X975 01386 partial                                     | custom          |
| NA                | 5979           | hypothetical protein X975 02502 partial                                     | custom          |
| 90509             | 5980           | tRNA (adenine(58)-N(1))-methyltransferase catalytic subunit TRMT61A partial | custom          |
| NA                | 5986           | 40S ribosomal protein S19 partial                                           | custom          |
| 90283             | 5987           | Dual specificity protein phosphatase 12 partial                             | custom          |
| NA                | 5988           | Brain-specific angiogenesis inhibitor 1-associated protein 2 partial        | custom          |
| NA                | 5989           | Sperm-associated antigen 7-like protein partial                             | custom          |
| 89886             | 5992           | Exosome complex component RRP40 partial                                     | custom          |
| NA                | 5993           | Alpha-12-mannosyltransferase ALG9 partial                                   | custom          |
| NA                | 5994           | ADP-ribosylation factor-like protein 2 partial                              | custom          |
| NA                | 5995           | DNA-directed RNA polymerase III subunit RPC6 partial                        | custom          |
| NA                | 5997           | 40S ribosomal protein S16 partial                                           | custom          |
| NA                | 5998           | Golgin subfamily A member 3 partial                                         | custom          |
| NA                | 5999           | RNA-binding protein 41 partial                                              | custom          |
| 89934             | 6003           | Endothelial differentiation-related factor 1-like protein partial           | custom          |
| NA                | 6006           | PAXIP1-associated protein 1 partial                                         | custom          |

**Supplemental Table 3 – continued from previous page**

| <b>Arthropod Core ID</b> | <b>Spider Core ID</b> | <b>Putative Ortholog Description</b>                                                     | <b>Target Database</b> |
|--------------------------|-----------------------|------------------------------------------------------------------------------------------|------------------------|
| NA                       | 6008                  | Cytosolic carboxypeptidase-like protein 5 partial                                        | custom                 |
| NA                       | 6011                  | Synembryn-A partial                                                                      | custom                 |
| 90521                    | 6012                  | Tetratricopeptide repeat protein 26 partial                                              | custom                 |
| NA                       | 6016                  | hypothetical protein X975 13078 partial                                                  | custom                 |
| NA                       | 6019                  | hypothetical protein X975 06563 partial                                                  | custom                 |
| 89987                    | 6021                  | Ubiquitin-like modifier-activating enzyme 5 partial                                      | custom                 |
| NA                       | 6023                  | Dolichyl-phosphate beta-glucosyltransferase partial                                      | custom                 |
| NA                       | 6026                  | Proteasomal ATPase-associated factor 1 partial                                           | custom                 |
| NA                       | 6032                  | putative nuclear transport factor 2 partial                                              | custom                 |
| NA                       | 6035                  | TBC1 domain family member 2B partial                                                     | custom                 |
| NA                       | 6036                  | La-related protein 6 partial                                                             | custom                 |
| 90204                    | 6038                  | Acyl-CoA synthetase family member 2 mitochondrial partial                                | custom                 |
| NA                       | 6045                  | RNA pseudouridylate synthase domain-containing protein 2 partial                         | custom                 |
| NA                       | 6049                  | Cyclin-dependent kinase 5 partial                                                        | custom                 |
| NA                       | 6050                  | Sushi von Willebrand factor type A EGF and pentraxin domain-containing protein 1 partial | custom                 |
| NA                       | 6059                  | hypothetical protein X975 14693 partial                                                  | custom                 |
| NA                       | 6066                  | Lysoplasmalogenase-like protein TMEM86A partial                                          | custom                 |
| NA                       | 6070                  | hypothetical protein X975 08491 partial                                                  | custom                 |

**Supplemental Table 3 – continued from previous page**

| <b>Arthropod Core ID</b> | <b>Spider Core ID</b> | <b>Putative Ortholog Description</b>                                    | <b>Target Database</b> |
|--------------------------|-----------------------|-------------------------------------------------------------------------|------------------------|
| NA                       | 6075                  | Peptidyl-prolyl<br>cis-trans isomerase<br>FKBP65 partial                | custom                 |
| NA                       | 6076                  | Methyltransferase-<br>like protein 5 partial                            | custom                 |
| NA                       | 6077                  | Poly [ADP-ribose]<br>polymerase 1 partial                               | custom                 |
| NA                       | 6078                  | MAU2 chromatid co-<br>hesion factor-like pro-<br>tein partial           | custom                 |
| NA                       | 6085                  | Nuclear transcription<br>factor Y subunit beta<br>partial               | custom                 |
| NA                       | 6087                  | WW domain-<br>containing oxidore-<br>ductase partial                    | custom                 |
| NA                       | 6091                  | Phosphatidylinositol<br>transfer protein alpha<br>isoform partial       | custom                 |
| NA                       | 6092                  | U3 small nucleolar<br>ribonucleoprotein<br>IMP4 partial                 | custom                 |
| 90348                    | 6093                  | Retinoblastoma-<br>binding protein 5<br>partial                         | custom                 |
| NA                       | 6094                  | RING-box protein 2<br>partial                                           | custom                 |
| NA                       | 6095                  | PREDICTED: trans-<br>membrane protein<br>199-like                       | nr                     |
| 90091                    | 6096                  | Syntaxin-18 partial                                                     | custom                 |
| NA                       | 6098                  | Serine proteinase<br>stubble partial                                    | custom                 |
| 90161                    | 6100                  | Peptidyl-prolyl<br>cis-trans isomerase<br>CWC27-like protein<br>partial | custom                 |
| NA                       | 6102                  | FGFR1 oncogene<br>partner 2-like protein<br>partial                     | custom                 |
| NA                       | 6103                  | SNARE-associated<br>protein Snapin partial                              | custom                 |
| NA                       | 6104                  | 26S proteasome non-<br>ATPase regulatory<br>subunit 8 partial           | custom                 |
| NA                       | 6105                  | Coiled-coil domain-<br>containing protein 75<br>partial                 | custom                 |

Supplemental Table 3 – continued from previous page

| Arthropod Core ID | Spider Core ID | Putative Ortholog Description                                                         | Target Database |
|-------------------|----------------|---------------------------------------------------------------------------------------|-----------------|
| NA                | 6106           | UV radiation resistance-associated protein partial                                    | custom          |
| 89739             | 6107           | Dehydrogenase/reductase SDR family member 4 partial                                   | custom          |
| NA                | 6108           | hypothetical protein X975 22088 partial                                               | custom          |
| NA                | 6109           | Gem-associated protein 2 partial                                                      | custom          |
| 89681             | 6111           | Ribosome biogenesis protein-like protein partial                                      | custom          |
| 90187             | 6112           | Transmembrane protein 147 partial                                                     | custom          |
| NA                | 6113           | Golgin-45 partial                                                                     | custom          |
| NA                | 6120           | Serine/threonine-protein kinase Nek7 partial                                          | custom          |
| NA                | 6125           | DNA polymerase eta                                                                    | nr              |
| NA                | 6130           | Evolutionarily conserved signaling intermediate in Toll pathway mitochondrial partial | custom          |
| NA                | 6154           | NIF3-like protein 1 partial                                                           | custom          |
| NA                | 6155           | DNA polymerase delta subunit 2 partial                                                | custom          |
| NA                | 6158           | hypothetical protein X975 14586 partial                                               | custom          |
| NA                | 6161           | Protein patched partial                                                               | custom          |
| NA                | 6162           | Embryonic polarity protein dorsal partial                                             | custom          |
| NA                | 6164           | Ubiquitin-conjugating enzyme E2 partial                                               | custom          |
| NA                | 6165           | 40S ribosomal protein S15 partial                                                     | custom          |
| 90408             | 6167           | Ubiquitin-fold modifier-conjugating enzyme 1 partial                                  | custom          |
| NA                | 6168           | Nuclear pore complex protein Nup160 partial                                           | custom          |

Supplemental Table 3 – continued from previous page

| Arthropod Core ID | Spider Core ID | Putative Ortholog Description                                           | Target Database |
|-------------------|----------------|-------------------------------------------------------------------------|-----------------|
| NA                | 6169           | Serine protease<br>HTRA2 mitochondrial partial                          | custom          |
| NA                | 6170           | Tyrosine-protein<br>phosphatase<br>corkscrew partial                    | custom          |
| NA                | 6171           | Exportin-7 partial                                                      | custom          |
| NA                | 6172           | putative methyltrans-<br>ferase partial                                 | custom          |
| NA                | 6173           | A-kinase anchor pro-<br>tein 17A partial                                | custom          |
| NA                | 6175           | Thioredoxin-like pro-<br>tein 4A partial                                | custom          |
| NA                | 6176           | 39S ribosomal pro-<br>tein L11 mitochon-<br>drial partial               | custom          |
| NA                | 6181           | N-acetyltransferase 6<br>partial                                        | custom          |
| NA                | 6190           | putative glutamate-<br>tRNA ligase mito-<br>chondrial partial           | custom          |
| NA                | 6197           | hypothetical protein<br>X975 19445 partial                              | custom          |
| NA                | 6199           | DNA/RNA-binding<br>protein KIN17 partial                                | custom          |
| NA                | 6203           | snRNA-activating<br>protein complex<br>subunit 1 partial                | custom          |
| NA                | 6207           | Myosin light chain al-<br>kali partial                                  | custom          |
| NA                | 6213           | hypothetical protein<br>X975 17964 partial                              | custom          |
| NA                | 6215           | Farnesyl pyrophos-<br>phate synthase<br>partial                         | custom          |
| NA                | 6220           | Histone deacetylase<br>complex subunit<br>SAP30-like protein<br>partial | custom          |
| NA                | 6221           | hypothetical protein<br>X975 11149 partial                              | custom          |
| NA                | 6222           | hypothetical protein<br>X975 12775 partial                              | custom          |
| NA                | 6223           | U3 small nucleolar<br>ribonucleoprotein<br>MPP10 partial                | custom          |
| 90566             | 6224           | Fatty acid-binding<br>protein partial                                   | custom          |

Supplemental Table 3 – continued from previous page

| Arthropod Core ID | Spider Core ID | Putative Ortholog Description                                                                  | Target Database |
|-------------------|----------------|------------------------------------------------------------------------------------------------|-----------------|
| NA                | 6225           | Ribosomal L1 domain-containing protein 1 partial                                               | custom          |
| NA                | 6226           | Rho guanine nucleotide exchange factor 26 partial                                              | custom          |
| NA                | 6227           | Aquaporin-9 partial                                                                            | custom          |
| NA                | 6228           | hypothetical protein X975 20306 partial                                                        | custom          |
| NA                | 6229           | putative succinate dehydrogenase [ubiquinone] cytochrome b small subunit mitochondrial partial | custom          |
| NA                | 6233           | Zinc finger protein 430 partial                                                                | custom          |
| NA                | 6235           | hypothetical protein X975 10533 partial                                                        | custom          |
| NA                | 6237           | rRNA methyltransferase 1 mitochondrial partial                                                 | custom          |
| NA                | 6238           | hypothetical protein X975 02062 partial                                                        | custom          |
| NA                | 6239           | hypothetical protein X975 14941 partial                                                        | custom          |
| NA                | 6242           | Scavenger mRNA-decapping enzyme DcpS partial                                                   | custom          |
| NA                | 6243           | TSC22 domain family protein 1 partial                                                          | custom          |
| NA                | 6244           | hypothetical protein X975 21388 partial                                                        | custom          |
| NA                | 6245           | RWD domain-containing protein 3 partial                                                        | custom          |
| NA                | 6247           | WAS protein family-like protein partial                                                        | custom          |
| NA                | 6248           | hypothetical protein X975 04136 partial                                                        | custom          |
| NA                | 6249           | Zinc finger C4H2 domain-containing protein partial                                             | custom          |
| 90157             | 6251           | 60s ribosomal protein L36                                                                      | nr              |
| NA                | 6252           | Protein FAM89A partial                                                                         | custom          |



**Supplemental Table 3 – continued from previous page**

| <b>Arthropod Core ID</b> | <b>Spider Core ID</b> | <b>Putative Ortholog Description</b>                           | <b>Target Database</b> |
|--------------------------|-----------------------|----------------------------------------------------------------|------------------------|
| NA                       | 6254                  | 40S ribosomal protein S15a partial                             | custom                 |
| NA                       | 6255                  | Ras GTPase-activating protein SynGAP partial                   | custom                 |
| 90450                    | 6260                  | 40S ribosomal protein S23 partial                              | custom                 |
| NA                       | 6261                  | GTP-binding protein SAR1b partial                              | custom                 |
| NA                       | 6262                  | 40S ribosomal protein S11 partial                              | custom                 |
| NA                       | 6264                  | Mediator of RNA polymerase II transcription subunit 28 partial | custom                 |
| NA                       | 6266                  | Amiloride-sensitive cation channel 5 partial                   | custom                 |
| NA                       | 6269                  | PREDICTED: proto-porphyrinogen oxidase                         | nr                     |
| NA                       | 6270                  | hypothetical protein X975 14454 partial                        | custom                 |
| NA                       | 6271                  | hypothetical protein X975 15250 partial                        | custom                 |
| NA                       | 6272                  | hypothetical protein X975 13709 partial                        | custom                 |
| NA                       | 6273                  | Cysteine-rich with EGF-like domain protein 1 partial           | custom                 |
| NA                       | 6275                  | U24-ctenitoxin-Pn1a partial                                    | custom                 |
| NA                       | 6277                  | hypothetical protein X975 19973 partial                        | custom                 |
| NA                       | 6278                  | putative transcription factor SOX-14 partial                   | custom                 |
| NA                       | 6282                  | Vesicle transport protein USE1 partial                         | custom                 |
| NA                       | 6284                  | Myosin light chain alkali partial                              | custom                 |
| NA                       | 6286                  | Protein lethal(2)essential for life partial                    | custom                 |
| NA                       | 6288                  | Zinc finger protein 385A partial                               | custom                 |
| NA                       | 6290                  | Platelet glycoprotein Ib alpha chain partial                   | custom                 |

Supplemental Table 3 – continued from previous page

| Arthropod Core ID | Spider Core ID | Putative Ortholog Description                                            | Target Database |
|-------------------|----------------|--------------------------------------------------------------------------|-----------------|
| 89954             | 6293           | Ubiquitin thioesterase OTUB1 partial                                     | custom          |
| NA                | 6301           | WW domain-binding protein 4 partial                                      | custom          |
| NA                | 6303           | Nuclear-interacting partner of ALK partial                               | custom          |
| NA                | 6304           | Sulfiredoxin-1 partial                                                   | custom          |
| NA                | 6305           | Zinc finger CCCH domain-containing protein 3 partial                     | custom          |
| NA                | 6309           | hypothetical protein X975 05641 partial                                  | custom          |
| NA                | 6311           | hypothetical protein X975 27251 partial                                  | custom          |
| NA                | 6313           | hypothetical protein X975 12832 partial                                  | custom          |
| NA                | 6327           | Importin-5 partial                                                       | custom          |
| NA                | 6334           | Zinc finger CCHC-type and RNA-binding motif-containing protein 1 partial | custom          |
| NA                | 6335           | PREDICTED: mediator of RNA polymerase II transcription subunit 31-A-like | nr              |
| NA                | 6336           | Alpha-tocopherol transfer protein-like protein partial                   | custom          |
| NA                | 6339           | Vacuolar protein sorting-associated protein 13C partial                  | custom          |
| NA                | 6341           | PREDICTED: RNA-binding protein 7-like                                    | nr              |
| NA                | 6345           | hypothetical protein X975 13533 partial                                  | custom          |
| 89764             | 6348           | Vesicle-trafficking protein SEC22b partial                               | custom          |
| NA                | 6349           | Nucleoporin NUP53 partial                                                | custom          |
| NA                | 6352           | hypothetical protein X975 02024 partial                                  | custom          |

**Supplemental Table 3 – continued from previous page**

| <b>Arthropod Core ID</b> | <b>Spider Core ID</b> | <b>Putative Ortholog Description</b>                                                    | <b>Target Database</b> |
|--------------------------|-----------------------|-----------------------------------------------------------------------------------------|------------------------|
| NA                       | 6353                  | putative dolichol-phosphate mannosyltransferase partial                                 | custom                 |
| NA                       | 6354                  | Exosome complex component CSL4 partial                                                  | custom                 |
| NA                       | 6355                  | 2-methoxy-6-polyprenyl-14-benzoquinol methylase mitochondrial partial                   | custom                 |
| NA                       | 6356                  | Protein DGCR6 partial                                                                   | custom                 |
| 89986                    | 6365                  | AP-2 complex subunit sigma partial                                                      | custom                 |
| NA                       | 6367                  | Mucosa-associated lymphoid tissue lymphoma translocation protein 1-like protein partial | custom                 |
| NA                       | 6368                  | Fibroblast growth factor receptor-like 1 partial                                        | custom                 |
| 90636                    | 6373                  | Protein AATF partial                                                                    | custom                 |
| NA                       | 6378                  | Eukaryotic translation initiation factor 6 partial                                      | custom                 |
| NA                       | 6379                  | GDP-fucose protein O-fucosyltransferase 2 partial                                       | custom                 |
| NA                       | 6381                  | hypothetical protein X975 02449 partial                                                 | custom                 |
| NA                       | 6395                  | Dehydrogenase/reductase SDR family member on chromosome X partial                       | custom                 |
| NA                       | 6396                  | G-protein coupled receptor moody partial                                                | custom                 |
| NA                       | 6402                  | 40S ribosomal protein S20 partial                                                       | custom                 |
| 90373                    | 6403                  | hypothetical protein X975 14484 partial                                                 | custom                 |
| NA                       | 6404                  | Glutamate-gated chloride channel partial                                                | custom                 |
| NA                       | 6406                  | NudC domain-containing protein 2 partial                                                | custom                 |

Supplemental Table 3 – continued from previous page

| Arthropod Core ID | Spider Core ID | Putative Ortholog Description                                            | Target Database |
|-------------------|----------------|--------------------------------------------------------------------------|-----------------|
| NA                | 6407           | Motile sperm domain-containing protein 1 partial                         | custom          |
| NA                | 6408           | Heat shock protein 14 partial                                            | custom          |
| 90494             | 6409           | Methyltransferase-like protein 6 partial                                 | custom          |
| NA                | 6410           | PREDICTED: phosphatidylinositol-glycan biosynthesis class W protein-like | nr              |
| NA                | 6414           | DNA primase small subunit partial                                        | custom          |
| NA                | 6415           | tRNA (guanine-N(7)-)-methyltransferase partial                           | custom          |
| NA                | 6416           | F-box only protein 3 partial                                             | custom          |
| NA                | 6417           | Gamma-tubulin complex component 4 partial                                | custom          |
| NA                | 6418           | Polyamine-modulated factor 1 partial                                     | custom          |
| NA                | 6419           | Tectonin beta-propeller repeat-containing protein 2 partial              | custom          |
| 90463             | 6421           | Proteasome subunit beta type-1 partial                                   | custom          |
| NA                | 6423           | Retrograde Golgi transport protein RGP1-like protein partial             | custom          |
| NA                | 6424           | Protein Njmu-R1 partial                                                  | custom          |
| NA                | 6425           | hypothetical protein X975 26411 partial                                  | custom          |
| NA                | 6426           | DNA damage-regulated autophagy modulator protein 2 partial               | custom          |
| NA                | 6427           | Phosphatidylinositol glycan anchor biosynthesis class U protein partial  | custom          |
| NA                | 6428           | hypothetical protein X975 14872 partial                                  | custom          |

Supplemental Table 3 – continued from previous page

| Arthropod Core ID | Spider Core ID | Putative Ortholog Description                                                    | Target Database |
|-------------------|----------------|----------------------------------------------------------------------------------|-----------------|
| NA                | 6431           | NF-kappa-B-repressing factor partial                                             | custom          |
| NA                | 6434           | hypothetical protein X975 07077 partial                                          | custom          |
| NA                | 6435           | CDGSH iron-sulfur domain-containing protein 3 mitochondrial partial              | custom          |
| NA                | 6437           | hypothetical protein X975 10237 partial                                          | custom          |
| NA                | 6441           | NA                                                                               | nr              |
| NA                | 6442           | 28S ribosomal protein S28 mitochondrial partial                                  | custom          |
| NA                | 6445           | Mitochondrial uncoupling protein 4 partial                                       | custom          |
| NA                | 6447           | hypothetical protein X975 00727 partial                                          | custom          |
| NA                | 6448           | Mitochondrial chaperone BCS1 partial                                             | custom          |
| NA                | 6449           | Chondroitin proteoglycan 2 partial                                               | custom          |
| NA                | 6451           | Tat-linked quality control protein TatD partial                                  | custom          |
| NA                | 6454           | hypothetical protein X975 24868 partial                                          | custom          |
| NA                | 6472           | Peptidyl-prolyl cis-trans isomerase-like 4 partial                               | custom          |
| NA                | 6473           | PREDICTED: serine beta-lactamase-like protein LACTB, mitochondrial               | nr              |
| NA                | 6477           | Pyridine nucleotide-disulfide oxidoreductase domain-containing protein 1 partial | custom          |
| NA                | 6481           | hypothetical protein X975 13749 partial                                          | custom          |
| NA                | 6485           | Solute carrier family 10 member 6 partial                                        | custom          |
| NA                | 6487           | Enolase-phosphatase E1 partial                                                   | custom          |
| NA                | 6488           | Cyclin-dependent kinase 12 partial                                               | custom          |

**Supplemental Table 3 – continued from previous page**

| <b>Arthropod Core ID</b> | <b>Spider Core ID</b> | <b>Putative Ortholog Description</b>                   | <b>Target Database</b> |
|--------------------------|-----------------------|--------------------------------------------------------|------------------------|
| NA                       | 6491                  | Torsin-1A-interacting protein 1 partial                | custom                 |
| NA                       | 6492                  | Dystrophin-like protein 1 partial                      | custom                 |
| NA                       | 6498                  | Leucine-rich repeat-containing protein 4B partial      | custom                 |
| NA                       | 6499                  | hypothetical protein X975 20564 partial                | custom                 |
| NA                       | 6503                  | Ketosamine-3-kinase partial                            | custom                 |
| NA                       | 6504                  | Nucleoporin GLE1 partial                               | custom                 |
| NA                       | 6505                  | hypothetical protein X975 25741 partial                | custom                 |
| 90028                    | 6506                  | putative small nuclear ribonucleoprotein Sm D1 partial | custom                 |
| NA                       | 6507                  | Protein retinal degeneration B partial                 | custom                 |
| 90186                    | 6510                  | Transmembrane protein 208 partial                      | custom                 |
| NA                       | 6512                  | Protein FAM160B1 partial                               | custom                 |
| NA                       | 6513                  | SOSS complex subunit B1 partial                        | custom                 |
| NA                       | 6514                  | Proline-rich protein PRCC partial                      | custom                 |
| 90326                    | 6518                  | Pre-mRNA-splicing factor 38B partial                   | custom                 |
| NA                       | 6519                  | Mesoderm induction early response protein 3 partial    | custom                 |
| NA                       | 6523                  | Protocadherin Fat 1 partial                            | custom                 |
| NA                       | 6524                  | Phosphatidate phosphatase PPAPDC1B partial             | custom                 |
| NA                       | 6525                  | Gamma-secretase subunit PEN-2 partial                  | custom                 |
| NA                       | 6526                  | ADP-ribosylation factor-like protein 4A partial        | custom                 |
| NA                       | 6527                  | GTP-binding protein 5 partial                          | custom                 |

**Supplemental Table 3 – continued from previous page**

| <b>Arthropod Core ID</b> | <b>Spider Core ID</b> | <b>Putative Ortholog Description</b>                                         | <b>Target Database</b> |
|--------------------------|-----------------------|------------------------------------------------------------------------------|------------------------|
| 89776                    | 6534                  | PREDICTED: COX assembly mitochondrial protein homolog                        | nr                     |
| 90432                    | 6543                  | Glutamate-rich WD repeat-containing protein 1 partial                        | custom                 |
| NA                       | 6545                  | Cation transport regulator-like protein 2 partial                            | custom                 |
| NA                       | 6546                  | hypothetical protein X975 25744 partial                                      | custom                 |
| NA                       | 6549                  | hypothetical protein X975 26200 partial                                      | custom                 |
| NA                       | 6551                  | E3 ubiquitin-protein ligase parkin partial                                   | custom                 |
| NA                       | 6553                  | Beta-14-mannosyl-glycoprotein 4-beta-N-acetylglucosaminyltransferase partial | custom                 |
| 89795                    | 6554                  | CAP-Gly domain-containing linker protein 1 partial                           | custom                 |
| NA                       | 6555                  | Coiled-coil domain-containing protein 130-like protein partial               | custom                 |
| NA                       | 6556                  | SPATS2-like protein partial                                                  | custom                 |
| NA                       | 6558                  | Transmembrane protein 115 partial                                            | custom                 |
| NA                       | 6559                  | Junction-mediating and -regulatory protein partial                           | custom                 |
| NA                       | 6560                  | hypothetical protein X975 26046 partial                                      | custom                 |
| NA                       | 6561                  | Dual specificity protein phosphatase 19 partial                              | custom                 |
| 90305                    | 6562                  | Protein mago nashi-like protein partial                                      | custom                 |
| NA                       | 6563                  | Loss of heterozygosity 12 chromosomal region 1 protein-like protein partial  | custom                 |
| NA                       | 6564                  | Clotting factor B partial                                                    | custom                 |

**Supplemental Table 3 – continued from previous page**

| <b>Arthropod Core ID</b> | <b>Spider Core ID</b> | <b>Putative Ortholog Description</b>                                  | <b>Target Database</b> |
|--------------------------|-----------------------|-----------------------------------------------------------------------|------------------------|
| NA                       | 6565                  | Nucleolar protein 14 partial                                          | custom                 |
| 90114                    | 6566                  | Histone-binding protein N1/N2 partial                                 | custom                 |
| 90206                    | 6567                  | 60S ribosomal protein L15 partial                                     | custom                 |
| NA                       | 6568                  | Proteasome assembly chaperone 2 partial                               | custom                 |
| NA                       | 6569                  | hypothetical protein X975 07522 partial                               | custom                 |
| NA                       | 6570                  | Unhealthy ribosome biogenesis protein 2-like protein partial          | custom                 |
| NA                       | 6572                  | hypothetical protein X975 09911 partial                               | custom                 |
| NA                       | 6575                  | Condensin-2 complex subunit H2 partial                                | custom                 |
| NA                       | 6576                  | MIP18 family protein partial                                          | custom                 |
| 90464                    | 6577                  | Mitochondrial fission 1 protein partial                               | custom                 |
| NA                       | 6584                  | 3-hydroxyacyl-CoA dehydrogenase type-2 partial                        | custom                 |
| NA                       | 6587                  | Succinate dehydrogenase cytochrome b560 subunit mitochondrial partial | custom                 |
| NA                       | 6588                  | Malignant T-cell-amplified sequence 1 partial                         | custom                 |
| NA                       | 6589                  | Coiled-coil domain-containing protein 86 partial                      | custom                 |
| NA                       | 6590                  | PREDICTED: ATP-dependent (S)-NAD(P)H-hydrate dehydratase-like         | nr                     |
| NA                       | 6594                  | NHP2-like protein 1 partial                                           | custom                 |
| NA                       | 6596                  | Transmembrane protein 85 partial                                      | custom                 |
| NA                       | 6597                  | hypothetical protein X975 27140 partial                               | custom                 |
| NA                       | 6603                  | Signal peptidase complex catalytic subunit SEC11C partial             | custom                 |



**Supplemental Table 3 – continued from previous page**

| <b>Arthropod Core ID</b> | <b>Spider Core ID</b> | <b>Putative Ortholog Description</b>                             | <b>Target Database</b> |
|--------------------------|-----------------------|------------------------------------------------------------------|------------------------|
| 89655                    | 6607                  | 28S ribosomal protein S24 mitochondrial partial                  | custom                 |
| NA                       | 6608                  | hypothetical protein X975 15788 partial                          | custom                 |
| NA                       | 6615                  | hypothetical protein X975 18876 partial                          | custom                 |
| NA                       | 6616                  | PREDICTED: ER membrane protein complex subunit 10-like isoform   | nr                     |
| NA                       | 6617                  | Eukaryotic translation initiation factor 3 subunit F partial     | custom                 |
| NA                       | 6623                  | Manganese-dependent ADP-ribose/CDP-alcohol diphosphatase partial | custom                 |
| NA                       | 6624                  | Chloride channel protein 2 partial                               | custom                 |
| NA                       | 6625                  | hypothetical protein X975 22119 partial                          | custom                 |
| NA                       | 6630                  | WD repeat-containing protein 26 partial                          | custom                 |
| NA                       | 6631                  | Ras guanyl-releasing protein 3 partial                           | custom                 |
| NA                       | 6632                  | G1/S-specific cyclin-D3 partial                                  | custom                 |
| NA                       | 6635                  | Pyridoxal kinase partial                                         | custom                 |
| 89881                    | 6636                  | Phosphoglycolate phosphatase partial                             | custom                 |
| NA                       | 6637                  | Graves disease carrier protein partial                           | custom                 |
| NA                       | 6642                  | GTP:AMP phosphotransferase mitochondrial partial                 | custom                 |
| NA                       | 6643                  | Peptidase inhibitor 16 partial                                   | custom                 |
| NA                       | 6644                  | Ubiquilin-1 partial                                              | custom                 |
| NA                       | 6646                  | Multidrug resistance-associated protein 1 partial                | custom                 |
| NA                       | 6651                  | Ras-like protein 2 partial                                       | custom                 |

**Supplemental Table 3 – continued from previous page**

| <b>Arthropod Core ID</b> | <b>Spider Core ID</b> | <b>Putative Ortholog Description</b>                                | <b>Target Database</b> |
|--------------------------|-----------------------|---------------------------------------------------------------------|------------------------|
| 89915                    | 6654                  | Mitochondrial import receptor subunit TOM40-like protein partial    | custom                 |
| NA                       | 6657                  | V-type proton AT-Pase proteolipid subunit partial                   | custom                 |
| NA                       | 6664                  | Adapter molecule Crk partial                                        | custom                 |
| NA                       | 6665                  | hypothetical protein X975 11149 partial                             | custom                 |
| NA                       | 6666                  | Filamentous hemagglutinin partial                                   | custom                 |
| NA                       | 6667                  | Mitochondrial import receptor subunit TOM20-like protein partial    | custom                 |
| NA                       | 6671                  | Sulfotransferase family cytosolic 1B member 1 partial               | custom                 |
| NA                       | 6673                  | Heme-binding protein 1 partial                                      | custom                 |
| NA                       | 6674                  | DNA repair protein complementing XP-C cells-like protein partial    | custom                 |
| NA                       | 6675                  | Protein FAM76A partial                                              | custom                 |
| NA                       | 6677                  | Serine/threonine-protein phosphatase 4 regulatory subunit 2 partial | custom                 |
| NA                       | 6684                  | Retinol dehydrogenase 14 partial                                    | custom                 |
| NA                       | 6688                  | Lysosomal-associated transmembrane protein 4A partial               | custom                 |
| NA                       | 6693                  | Zinc finger MYND domain-containing protein 19 partial               | custom                 |
| NA                       | 6698                  | Activin receptor type-2B partial                                    | custom                 |
| NA                       | 6699                  | Neurogenic locus notch-like protein 2 partial                       | custom                 |
| NA                       | 6700                  | Adenylate kinase isoenzyme 6 partial                                | custom                 |

Supplemental Table 3 – continued from previous page

| Arthropod Core ID | Spider Core ID | Putative Ortholog Description                                               | Target Database |
|-------------------|----------------|-----------------------------------------------------------------------------|-----------------|
| NA                | 6701           | NADH dehydrogenase [ubiquinone] iron-sulfur protein 3 mitochondrial partial | custom          |
| NA                | 6703           | hypothetical protein X975_06736 partial                                     | custom          |
| NA                | 6706           | Wilms tumor protein 1-interacting protein-like protein partial              | custom          |
| NA                | 6707           | Transcription factor MafK partial                                           | custom          |
| NA                | 6708           | NADH dehydrogenase [ubiquinone] 1 beta subcomplex subunit 9 partial         | custom          |
| NA                | 6709           | Alpha N-terminal protein methyltransferase 1A-B partial                     | custom          |
| NA                | 6712           | PREDICTED: vesicle transport protein SEC20-like                             | nr              |
| NA                | 6713           | Mitochondrial import inner membrane translocase subunit Tim17-B partial     | custom          |
| NA                | 6715           | SH3 domain-binding glutamic acid-rich protein-like protein partial          | custom          |
| NA                | 6717           | Rac GTPase-activating protein 1 partial                                     | custom          |
| NA                | 6718           | E3 ubiquitin-protein ligase RNF25 partial                                   | custom          |
| NA                | 6720           | putative RNA exonuclease NEF-sp partial                                     | custom          |
| 90256             | 6722           | Ras-related protein Rab-11B partial                                         | custom          |
| 90490             | 6727           | DNA-directed RNA polymerases I and III subunit RPAC1 partial                | custom          |
| NA                | 6739           | Calcitonin receptor                                                         | nr              |
| NA                | 6753           | Pre-mRNA-splicing factor 38A partial                                        | custom          |

Supplemental Table 3 – continued from previous page

| Arthropod Core ID | Spider Core ID | Putative Ortholog Description                                       | Target Database |
|-------------------|----------------|---------------------------------------------------------------------|-----------------|
| NA                | 6761           | Platelet-activating factor acetylhydrolase IB subunit gamma partial | custom          |
| NA                | 6764           | Survival motor neuron protein partial                               | custom          |
| 90549             | 6779           | PREDICTED: microspherule protein 1-like                             | nr              |
| NA                | 6781           | Sel1 repeat-containing protein 1-like protein partial               | custom          |
| NA                | 6782           | hypothetical protein X975 09721 partial                             | custom          |
| NA                | 6786           | Kielin/chordin-like protein partial                                 | custom          |
| NA                | 6788           | 6-phosphogluconolactonase partial                                   | custom          |
| NA                | 6792           | Abhydrolase domain-containing protein 11 partial                    | custom          |
| NA                | 6793           | Nuclear pore complex protein Nup85 partial                          | custom          |
| NA                | 6800           | 60S ribosome subunit biogenesis protein NIP7-like protein partial   | custom          |
| 89763             | 6804           | hypothetical protein X975 18371 partial                             | custom          |
| NA                | 6805           | Ragulator complex protein LAMTOR1 partial                           | custom          |
| 90232             | 6806           | 40S ribosomal protein S24 partial                                   | custom          |
| 90013             | 6807           | Cytochrome c oxidase subunit 5A mitochondrial partial               | custom          |
| 89860             | 6808           | 60S ribosomal protein L6 partial                                    | custom          |
| NA                | 6809           | Ras and EF-hand domain-containing protein partial                   | custom          |
| NA                | 6810           | Actin-related protein 2/3 complex subunit 4 partial                 | custom          |

**Supplemental Table 3 – continued from previous page**

| <b>Arthropod Core ID</b> | <b>Spider Core ID</b> | <b>Putative Ortholog Description</b>                              | <b>Target Database</b> |
|--------------------------|-----------------------|-------------------------------------------------------------------|------------------------|
| NA                       | 6811                  | Decaprenyl-diphosphate synthase subunit 2 partial                 | custom                 |
| NA                       | 6812                  | Peptidyl-prolyl cis-trans isomerase-like 1 partial                | custom                 |
| NA                       | 6813                  | hypothetical protein X975 19754 partial                           | custom                 |
| NA                       | 6816                  | General transcription factor IIIH subunit 3 partial               | custom                 |
| NA                       | 6817                  | putative 39S ribosomal protein L23 mitochondrial partial          | custom                 |
| NA                       | 6818                  | 39S ribosomal protein L13 mitochondrial partial                   | custom                 |
| NA                       | 6819                  | Nucleolar protein 6 partial                                       | custom                 |
| 90331                    | 6821                  | Abhydrolase domain-containing protein partial                     | custom                 |
| NA                       | 6822                  | Stromal cell-derived factor 2 partial                             | custom                 |
| 89855                    | 6823                  | Serine/threonine-protein phosphatase 4 catalytic subunit partial  | custom                 |
| NA                       | 6826                  | RNA-binding protein with serine-rich domain 1-B partial           | custom                 |
| NA                       | 6827                  | Sepiapterin reductase partial                                     | custom                 |
| NA                       | 6829                  | U3 small nucleolar RNA-associated protein 14-like protein partial | custom                 |
| NA                       | 6831                  | hypothetical protein X975 11695 partial                           | custom                 |
| 89852                    | 6842                  | Voltage-dependent anion-selective channel protein 2 partial       | custom                 |
| NA                       | 6843                  | PREDICTED: axin-1-like                                            | nr                     |
| NA                       | 6844                  | rRNA-processing protein FCF1-like protein partial                 | custom                 |

**Supplemental Table 3 – continued from previous page**

| <b>Arthropod Core ID</b> | <b>Spider Core ID</b> | <b>Putative Ortholog Description</b>                                | <b>Target Database</b> |
|--------------------------|-----------------------|---------------------------------------------------------------------|------------------------|
| NA                       | 6863                  | Tumor suppressor p53-binding protein 1 partial                      | custom                 |
| NA                       | 6870                  | NA                                                                  | nr                     |
| NA                       | 6871                  | Prefoldin subunit 5 partial                                         | custom                 |
| NA                       | 6872                  | Methyltransferase-like protein 9 partial                            | custom                 |
| 90056                    | 6873                  | putative RNA-binding protein EIF1AD partial                         | custom                 |
| NA                       | 6874                  | Ribonuclease H1 partial                                             | custom                 |
| NA                       | 6875                  | DNA-directed RNA polymerase III subunit RPC4 partial                | custom                 |
| NA                       | 6876                  | Glucocorticoid-induced transcript 1 protein partial                 | custom                 |
| NA                       | 6877                  | NA                                                                  | nr                     |
| NA                       | 6878                  | Anaphase-promoting complex subunit 1 partial                        | custom                 |
| NA                       | 6879                  | HEAT repeat-containing protein 2 partial                            | custom                 |
| NA                       | 6880                  | DNA-directed RNA polymerase II subunit RPB3 partial                 | custom                 |
| NA                       | 6882                  | Zinc finger protein 850 partial                                     | custom                 |
| NA                       | 6883                  | Pre-mRNA-splicing factor ISY1-like protein partial                  | custom                 |
| NA                       | 6884                  | hypothetical protein X975 24266 partial                             | custom                 |
| NA                       | 6885                  | Iron-sulfur cluster co-chaperone protein HscB mitochondrial partial | custom                 |
| NA                       | 6886                  | Laminin subunit alpha-2 partial                                     | custom                 |
| 90150                    | 6888                  | Glyceraldehyde-3-phosphate dehydrogenase partial                    | custom                 |
| NA                       | 6889                  | 60S acidic ribosomal protein P2 partial                             | custom                 |

**Supplemental Table 3 – continued from previous page**

| <b>Arthropod Core ID</b> | <b>Spider Core ID</b> | <b>Putative Ortholog Description</b>                          | <b>Target Database</b> |
|--------------------------|-----------------------|---------------------------------------------------------------|------------------------|
| NA                       | 6890                  | Proteasome subunit beta type-6 partial                        | custom                 |
| NA                       | 6891                  | Protein translation factor SUI1-like protein partial          | custom                 |
| NA                       | 6892                  | hypothetical protein X975 04391 partial                       | custom                 |
| NA                       | 6893                  | 40S ribosomal protein S10b partial                            | custom                 |
| 89760                    | 6894                  | 60S ribosomal protein L31 partial                             | custom                 |
| 90031                    | 6895                  | 60S ribosomal protein L7 partial                              | custom                 |
| 89731                    | 6896                  | 60S ribosomal protein L30 partial                             | custom                 |
| 90264                    | 6897                  | 60S ribosomal protein L12 partial                             | custom                 |
| NA                       | 6898                  | Ras-related protein Rap-1b partial                            | custom                 |
| NA                       | 6899                  | Ferritin spleen middle subunit partial                        | custom                 |
| 90110                    | 6900                  | Ras-related protein Rab-14 partial                            | custom                 |
| NA                       | 6901                  | Midasin partial                                               | custom                 |
| 90214                    | 6902                  | General transcription factor IIH subunit 1 partial            | custom                 |
| NA                       | 6904                  | DDB1- and CUL4-associated factor 5 partial                    | custom                 |
| 90237                    | 6905                  | Myosin-2 essential light chain partial                        | custom                 |
| NA                       | 6906                  | Cancer-related nucleoside-triphosphatase-like protein partial | custom                 |
| NA                       | 6908                  | Intraflagellar transport protein 57-like protein partial      | custom                 |
| NA                       | 6909                  | hypothetical protein X975 12428 partial                       | custom                 |
| NA                       | 6910                  | GPI ethanolamine phosphate transferase 1 partial              | custom                 |
| NA                       | 6911                  | General transcription factor IIH subunit 4 partial            | custom                 |

**Supplemental Table 3 – continued from previous page**

| <b>Arthropod Core ID</b> | <b>Spider Core ID</b> | <b>Putative Ortholog Description</b>                          | <b>Target Database</b> |
|--------------------------|-----------------------|---------------------------------------------------------------|------------------------|
| NA                       | 6919                  | hypothetical protein X975 17561 partial                       | custom                 |
| NA                       | 6922                  | Isobutyryl-CoA dehydrogenase mitochondrial partial            | custom                 |
| NA                       | 6933                  | Dimethyladenosine transferase 2 mitochondrial partial         | custom                 |
| NA                       | 6939                  | 39S ribosomal protein L55 mitochondrial partial               | custom                 |
| 89989                    | 6942                  | Tafazzin partial                                              | custom                 |
| NA                       | 6949                  | Protein SREK1IP1 partial                                      | custom                 |
| NA                       | 6951                  | Ribonuclease P protein subunit p14 partial                    | custom                 |
| NA                       | 6955                  | Presqualene diphosphate phosphatase partial                   | custom                 |
| NA                       | 6956                  | hypothetical protein X975 01203 partial                       | custom                 |
| NA                       | 6957                  | putative tRNA (uracil-O(2)-)-methyltransferase partial        | custom                 |
| NA                       | 6958                  | L-cystatin partial                                            | custom                 |
| NA                       | 6959                  | hypothetical protein X975 24714 partial                       | custom                 |
| 90526                    | 6960                  | Hypothetical protein phosphatase 2C T23F11.1 partial          | custom                 |
| 90189                    | 6961                  | Mediator of RNA polymerase II transcription subunit 7 partial | custom                 |
| NA                       | 6962                  | Protein pangolin isoforms A/H/I partial                       | custom                 |
| NA                       | 6964                  | Cytochrome b-c1 complex subunit 7 partial                     | custom                 |
| NA                       | 6967                  | Golgi SNAP receptor complex member 2 partial                  | custom                 |
| NA                       | 6968                  | Potassium channel subfamily K member 6 partial                | custom                 |



Supplemental Table 3 – continued from previous page

| Arthropod Core ID | Spider Core ID | Putative Ortholog Description                                                    | Target Database |
|-------------------|----------------|----------------------------------------------------------------------------------|-----------------|
| 89817             | 6969           | Cytochrome c oxidase subunit 6A1 mitochondrial partial                           | custom          |
| NA                | 6976           | Leucine-rich repeat and fibronectin type-III domain-containing protein 4 partial | custom          |
| NA                | 6977           | Tetratricopeptide repeat protein 31 partial                                      | custom          |
| NA                | 6978           | putative methyltransferase-like protein 15 partial                               | custom          |
| NA                | 6979           | Protein toll partial                                                             | custom          |
| NA                | 6986           | Nitrogen permease regulator 2-like protein partial                               | custom          |
| NA                | 6989           | PREDICTED: NHL repeat-containing protein 2                                       | nr              |
| NA                | 6991           | PREDICTED: UDP-xylose and UDP-N-acetylglucosamine transporter                    | nr              |
| NA                | 6993           | Sugar transporter SWEET1 partial                                                 | custom          |
| NA                | 6999           | Peptidyl-prolyl cis-trans isomerase E partial                                    | custom          |
| NA                | 7007           | hypothetical protein X975 12423 partial                                          | custom          |
| NA                | 7009           | Protoheme IX farnesyltransferase mitochondrial partial                           | custom          |
| NA                | 7010           | Arf-GAP domain and FG repeat-containing protein 2 partial                        | custom          |
| NA                | 7015           | Protein cappuccino-like protein partial                                          | custom          |
| NA                | 7016           | Soluble guanylate cyclase 88E partial                                            | custom          |
| NA                | 7017           | Chondroitin proteoglycan-2 partial                                               | custom          |
| NA                | 7019           | hypothetical protein X975 14780 partial                                          | custom          |

**Supplemental Table 3 – continued from previous page**

| <b>Arthropod Core ID</b> | <b>Spider Core ID</b> | <b>Putative Ortholog Description</b>                                               | <b>Target Database</b> |
|--------------------------|-----------------------|------------------------------------------------------------------------------------|------------------------|
| NA                       | 7023                  | NADH dehydrogenase [ubiquinone] 1 beta subcomplex subunit 11 mitochondrial partial | custom                 |
| NA                       | 7024                  | Epidermal retinol dehydrogenase 2 partial                                          | custom                 |
| NA                       | 7027                  | Kalirin partial                                                                    | custom                 |
| 90324                    | 7032                  | Ubiquinone biosynthesis protein COQ7-like protein partial                          | custom                 |
| NA                       | 7033                  | Phospholipase A2 partial                                                           | custom                 |
| NA                       | 7044                  | Src kinase-associated phosphoprotein 2 partial                                     | custom                 |
| NA                       | 7053                  | Cysteine-rich secretory protein 2 partial                                          | custom                 |
| NA                       | 7064                  | PREDICTED: uncharacterized protein LOC106466561                                    | nr                     |
| NA                       | 7073                  | Partitioning defective 3-like protein partial                                      | custom                 |
| NA                       | 7074                  | DNA-(apurinic or apyrimidinic site) lyase 2 partial                                | custom                 |
| NA                       | 7082                  | Leucine carboxyl methyltransferase 2 partial                                       | custom                 |
| NA                       | 7083                  | Acylphosphatase-2 partial                                                          | custom                 |
| NA                       | 7084                  | G2/mitotic-specific cyclin-B partial                                               | custom                 |
| NA                       | 7085                  | Ubiquitin-related modifier 1-like protein partial                                  | custom                 |
| NA                       | 7087                  | U3 small nucleolar RNA-associated protein 18-like protein partial                  | custom                 |
| NA                       | 7088                  | Dual specificity protein phosphatase 3 partial                                     | custom                 |
| NA                       | 7089                  | DNA-directed RNA polymerase II subunit RPB9 partial                                | custom                 |

**Supplemental Table 3 – continued from previous page**

| <b>Arthropod Core ID</b> | <b>Spider Core ID</b> | <b>Putative Ortholog Description</b>                  | <b>Target Database</b> |
|--------------------------|-----------------------|-------------------------------------------------------|------------------------|
| NA                       | 7094                  | 39S ribosomal protein L35 mitochondrial partial       | custom                 |
| NA                       | 7095                  | NADH dehydrogenase [ubiquinone] 1 subunit C2 partial  | custom                 |
| NA                       | 7097                  | Negative elongation factor E partial                  | custom                 |
| NA                       | 7098                  | Cation-dependent mannose-6-phosphate receptor partial | custom                 |
| NA                       | 7100                  | Pecanex-like protein 3 partial                        | custom                 |
| NA                       | 7102                  | D-tyrosyl-tRNA(Tyr) deacylase 1 partial               | custom                 |
| NA                       | 7103                  | putative polyprenol reductase partial                 | custom                 |
| NA                       | 7112                  | Ubiquitin-conjugating enzyme E2 J1 partial            | custom                 |
| NA                       | 7113                  | Transmembrane protein 19 partial                      | custom                 |
| NA                       | 7122                  | NA                                                    | nr                     |
| NA                       | 7128                  | hypothetical protein X975 14148 partial               | custom                 |
| NA                       | 7130                  | hypothetical protein X975 11730 partial               | custom                 |
| NA                       | 7133                  | Upstream activation factor subunit spp27 partial      | custom                 |
| NA                       | 7146                  | hypothetical protein X975 11405 partial               | custom                 |
| NA                       | 7150                  | hypothetical protein X975 14820 partial               | custom                 |
| NA                       | 7162                  | 39S ribosomal protein L39 mitochondrial partial       | custom                 |
| NA                       | 7165                  | Histone H2B.3 partial                                 | custom                 |
| 90213                    | 7167                  | Ras-related protein Rab-20 partial                    | custom                 |
| NA                       | 7170                  | CUE domain-containing protein 1 partial               | custom                 |
| NA                       | 7173                  | Nucleoporin SEH1 partial                              | custom                 |

**Supplemental Table 3 – continued from previous page**

| <b>Arthropod Core ID</b> | <b>Spider Core ID</b> | <b>Putative Ortholog Description</b>                                      | <b>Target Database</b> |
|--------------------------|-----------------------|---------------------------------------------------------------------------|------------------------|
| NA                       | 7175                  | Uridine diphosphate glucose pyrophosphatase partial                       | custom                 |
| NA                       | 7176                  | Solute carrier family 22 member 1 partial                                 | custom                 |
| NA                       | 7177                  | CBP80/20-dependent translation initiation factor partial                  | custom                 |
| NA                       | 7179                  | Gamma-glutamylaminocyclotransferase partial                               | custom                 |
| NA                       | 7181                  | Solute carrier family 2 facilitated glucose transporter member 12 partial | custom                 |
| NA                       | 7189                  | Cysteine-rich with EGF-like domain protein 1 partial                      | custom                 |
| NA                       | 7193                  | Thymidine kinase cytosolic partial                                        | custom                 |
| NA                       | 7195                  | Acyl-CoA-binding domain-containing protein 5 partial                      | custom                 |
| NA                       | 7197                  | hypothetical protein X975 23170 partial                                   | custom                 |
| NA                       | 7198                  | Melanoma-associated antigen D2 partial                                    | custom                 |
| 90551                    | 7204                  | hypothetical protein X975 12812 partial                                   | custom                 |
| NA                       | 7206                  | hypothetical protein X975 23192 partial                                   | custom                 |
| NA                       | 7207                  | Ubiquinone biosynthesis protein COQ9 mitochondrial partial                | custom                 |
| NA                       | 7214                  | DTW domain-containing protein 1                                           | nr                     |
| NA                       | 7216                  | Diphosphomevalonate decarboxylase partial                                 | custom                 |
| NA                       | 7221                  | Cyclin-G-associated kinase partial                                        | custom                 |
| NA                       | 7226                  | RNA (guanine-9-)-methyltransferase domain-containing protein 2 partial    | custom                 |

**Supplemental Table 3 – continued from previous page**

| <b>Arthropod Core ID</b> | <b>Spider Core ID</b> | <b>Putative Ortholog Description</b>                                          | <b>Target Database</b> |
|--------------------------|-----------------------|-------------------------------------------------------------------------------|------------------------|
| NA                       | 7228                  | RNA pseudouridylate synthase domain-containing protein 4 partial              | custom                 |
| NA                       | 7230                  | Targeting protein for Xklp2 partial                                           | custom                 |
| NA                       | 7237                  | Selenocysteine insertion sequence-binding protein 2-like protein partial      | custom                 |
| NA                       | 7247                  | Arf-GAP with SH3 domain ANK repeat and PH domain-containing protein 1 partial | custom                 |
| NA                       | 7248                  | Protein inturred partial                                                      | custom                 |
| NA                       | 7253                  | PREDICTED: DNA-directed RNA polymerases I and III subunit RPAC2-like          | nr                     |
| NA                       | 7257                  | L-azetidine-2-carboxylic acid acetyltransferase partial                       | custom                 |
| NA                       | 7258                  | PREDICTED: intraflagellar transport protein 43 homolog A-like                 | nr                     |
| NA                       | 7259                  | Proteasome assembly chaperone 3 partial                                       | custom                 |
| NA                       | 7260                  | conserved hypothetical protein                                                | nr                     |
| NA                       | 7261                  | Lysyl oxidase-like protein partial                                            | custom                 |
| NA                       | 7262                  | Protein pellino partial                                                       | custom                 |
| NA                       | 7264                  | Coilin partial                                                                | custom                 |
| 89866                    | 7268                  | DNA repair protein RAD51-like protein partial                                 | custom                 |
| NA                       | 7273                  | DNA-directed RNA polymerase III subunit RPC8 partial                          | custom                 |
| NA                       | 7277                  | hypothetical protein X975 17113 partial                                       | custom                 |
| NA                       | 7278                  | SUN domain-containing protein 1 partial                                       | custom                 |

**Supplemental Table 3 – continued from previous page**

| <b>Arthropod Core ID</b> | <b>Spider Core ID</b> | <b>Putative Ortholog Description</b>                          | <b>Target Database</b> |
|--------------------------|-----------------------|---------------------------------------------------------------|------------------------|
| NA                       | 7284                  | hypothetical protein X975 23741 partial                       | custom                 |
| NA                       | 7285                  | PREDICTED: protein expanded-like                              | nr                     |
| NA                       | 7289                  | Ceramide glucosyl-transferase partial                         | custom                 |
| NA                       | 7292                  | Peroxisome biogenesis factor 10 partial                       | custom                 |
| NA                       | 7294                  | Pre-mRNA cleavage complex 2 protein Pcf11 partial             | custom                 |
| NA                       | 7295                  | Histone H2A.V partial                                         | custom                 |
| NA                       | 7296                  | NA                                                            | nr                     |
| NA                       | 7297                  | hypothetical protein X975 20039 partial                       | custom                 |
| NA                       | 7298                  | NA                                                            | nr                     |
| NA                       | 7299                  | Mitotic spindle-associated MMXD complex subunit MIP18 partial | custom                 |
| NA                       | 7301                  | 28S ribosomal protein S10 mitochondrial partial               | custom                 |
| NA                       | 7302                  | FtsJ methyltransferase domain-containing protein 1 partial    | custom                 |
| NA                       | 7303                  | Tight junction-associated protein 1 partial                   | custom                 |
| NA                       | 7305                  | CpG-binding protein partial                                   | custom                 |
| NA                       | 7306                  | NA                                                            | nr                     |
| NA                       | 7309                  | 28S ribosomal protein S6 mitochondrial partial                | custom                 |
| NA                       | 7322                  | Zinc finger protein 830 partial                               | custom                 |
| NA                       | 7323                  | Protein SGT1 partial                                          | custom                 |
| NA                       | 7324                  | hypothetical protein X975 19984 partial                       | custom                 |
| NA                       | 7325                  | RNA-binding protein 42 partial                                | custom                 |
| NA                       | 7326                  | Unconventional myosin-XVIIIa partial                          | custom                 |

**Supplemental Table 3 – continued from previous page**

| <b>Arthropod Core ID</b> | <b>Spider Core ID</b> | <b>Putative Ortholog Description</b>                                          | <b>Target Database</b> |
|--------------------------|-----------------------|-------------------------------------------------------------------------------|------------------------|
| NA                       | 7328                  | Thioredoxin domain-containing protein partial                                 | custom                 |
| NA                       | 7330                  | Coiled-coil domain-containing protein 85C partial                             | custom                 |
| NA                       | 7331                  | Protein JTB partial                                                           | custom                 |
| NA                       | 7332                  | putative Ras-related protein Rab-33 partial                                   | custom                 |
| NA                       | 7334                  | Protein C10 partial                                                           | custom                 |
| NA                       | 7335                  | Zinc finger CCHC domain-containing protein 10 partial                         | custom                 |
| NA                       | 7340                  | Autism susceptibility 2 protein partial                                       | custom                 |
| NA                       | 7342                  | Protease-associated domain-containing protein 1 partial                       | custom                 |
| 90074                    | 7343                  | Kinesin-like protein KIF21A partial                                           | custom                 |
| NA                       | 7344                  | DNA polymerase beta partial                                                   | custom                 |
| NA                       | 7345                  | Protein VAC14-like protein partial                                            | custom                 |
| NA                       | 7350                  | Gem-associated protein 6 partial                                              | custom                 |
| NA                       | 7358                  | Protein TSSC4 partial                                                         | custom                 |
| NA                       | 7359                  | THAP domain-containing protein 6 partial                                      | custom                 |
| NA                       | 7360                  | TATA box-binding protein-associated factor RNA polymerase I subunit C partial | custom                 |
| NA                       | 7365                  | Protein arginine N-methyltransferase 1 partial                                | custom                 |
| NA                       | 7366                  | Serine/threonine-protein kinase 19 partial                                    | custom                 |
| NA                       | 7367                  | hypothetical protein X975 15305 partial                                       | custom                 |
| 89793                    | 7368                  | 39S ribosomal protein L4 mitochondrial partial                                | custom                 |

Supplemental Table 3 – continued from previous page

| Arthropod Core ID | Spider Core ID | Putative Ortholog Description                                           | Target Database |
|-------------------|----------------|-------------------------------------------------------------------------|-----------------|
| NA                | 7371           | Coactosin-like protein partial                                          | custom          |
| NA                | 7372           | Protein FAM18B1 partial                                                 | custom          |
| NA                | 7377           | BET1-like protein partial                                               | custom          |
| NA                | 7378           | Peptidyl-prolyl cis-trans isomerase NIMA-interacting 1 partial          | custom          |
| NA                | 7379           | Polycomb group RING finger protein 3 partial                            | custom          |
| NA                | 7380           | Protein patched partial                                                 | custom          |
| 90033             | 7382           | hypothetical protein X975 26265 partial                                 | custom          |
| 90356             | 7385           | Dihydroorotate dehydrogenase (quinone) mitochondrial partial            | custom          |
| NA                | 7386           | Zinc finger RAD18 domain-containing protein partial                     | custom          |
| NA                | 7388           | hypothetical protein X975 03076 partial                                 | custom          |
| NA                | 7392           | PREDICTED: uncharacterized protein LOC106465114                         | nr              |
| NA                | 7393           | UbiA prenyltransferase domain-containing protein 1-like protein partial | custom          |
| NA                | 7411           | Voltage-gated hydrogen channel 1 partial                                | custom          |
| NA                | 7413           | TM2 domain-containing protein partial                                   | custom          |
| NA                | 7418           | hypothetical protein X975 01283 partial                                 | custom          |
| NA                | 7427           | Delta(35)-Delta(24)-dienoyl-CoA isomerase mitochondrial partial         | custom          |
| NA                | 7435           | Golgi pH regulator partial                                              | custom          |
| NA                | 7436           | D-dopachrome decarboxylase-A partial                                    | custom          |



**Supplemental Table 3 – continued from previous page**

| <b>Arthropod Core ID</b> | <b>Spider Core ID</b> | <b>Putative Ortholog Description</b>                                        | <b>Target Database</b> |
|--------------------------|-----------------------|-----------------------------------------------------------------------------|------------------------|
| NA                       | 7442                  | Transient receptor hypothetical cation channel subfamily M member 6 partial | custom                 |
| NA                       | 7443                  | Nucleolar protein 12 partial                                                | custom                 |
| NA                       | 7444                  | FERM RhoGEF and pleckstrin domain-containing protein 2 partial              | custom                 |
| NA                       | 7445                  | hypothetical protein X975 05858 partial                                     | custom                 |
| NA                       | 7447                  | Metallo-beta-lactamase domain-containing protein 1 partial                  | custom                 |
| 89648                    | 7448                  | 60S ribosomal protein L21 partial                                           | custom                 |
| NA                       | 7449                  | L-fucose kinase partial                                                     | custom                 |
| NA                       | 7450                  | WD repeat SAM and U-box domain-containing protein 1 partial                 | custom                 |
| NA                       | 7455                  | hypothetical protein X975 24529 partial                                     | custom                 |
| NA                       | 7456                  | putative dimethyladenosine transferase partial                              | custom                 |
| NA                       | 7458                  | Hermansky-Pudlak syndrome 1 protein partial                                 | custom                 |
| NA                       | 7462                  | RPA-interacting protein A partial                                           | custom                 |
| NA                       | 7464                  | Hemicentin-1 partial                                                        | custom                 |
| NA                       | 7466                  | MRG-binding protein partial                                                 | custom                 |
| NA                       | 7467                  | hypothetical protein X975 14363 partial                                     | custom                 |
| NA                       | 7469                  | Sentrin-specific protease 8 partial                                         | custom                 |
| NA                       | 7475                  | Caseinolytic peptidase B protein-like protein partial                       | custom                 |
| NA                       | 7476                  | Caseinolytic peptidase B protein-like protein partial                       | custom                 |

**Supplemental Table 3 – continued from previous page**

| <b>Arthropod Core ID</b> | <b>Spider Core ID</b> | <b>Putative Ortholog Description</b>                                 | <b>Target Database</b> |
|--------------------------|-----------------------|----------------------------------------------------------------------|------------------------|
| NA                       | 7477                  | PHD and RING finger domain-containing protein 1 partial              | custom                 |
| 90628                    | 7478                  | Calcium channel flower partial                                       | custom                 |
| NA                       | 7490                  | NA                                                                   | nr                     |
| 90527                    | 7499                  | Serine/threonine-protein phosphatase 5 partial                       | custom                 |
| NA                       | 7505                  | cGMP-specific 3'5'-cyclic phosphodiesterase partial                  | custom                 |
| NA                       | 7512                  | Heme-binding protein 1 partial                                       | custom                 |
| NA                       | 7514                  | hypothetical protein X975 11974 partial                              | custom                 |
| NA                       | 7522                  | Mpv17-like protein 2 partial                                         | custom                 |
| NA                       | 7535                  | 2'5'-phosphodiesterase 12 partial                                    | custom                 |
| NA                       | 7541                  | hypothetical protein X975 23765 partial                              | custom                 |
| NA                       | 7547                  | Unhealthy ribosome biogenesis protein 2-like protein partial         | custom                 |
| NA                       | 7549                  | Transcription initiation factor TFIID subunit 1 partial              | custom                 |
| NA                       | 7551                  | putative nuclear hormone receptor HR38 partial                       | custom                 |
| NA                       | 7554                  | putative lysine-specific demethylase 4B partial                      | custom                 |
| NA                       | 7568                  | Lysyl oxidase-like protein partial                                   | custom                 |
| NA                       | 7572                  | NADH dehydrogenase [ubiquinone] 1 alpha subcomplex subunit 6 partial | custom                 |
| NA                       | 7573                  | Protein phosphatase 1 regulatory subunit 11 partial                  | custom                 |
| NA                       | 7577                  | hypothetical protein X975 06657 partial                              | custom                 |

**Supplemental Table 3 – continued from previous page**

| <b>Arthropod Core ID</b> | <b>Spider Core ID</b> | <b>Putative Ortholog Description</b>                                        | <b>Target Database</b> |
|--------------------------|-----------------------|-----------------------------------------------------------------------------|------------------------|
| NA                       | 7580                  | hypothetical protein X975 00950 partial                                     | custom                 |
| NA                       | 7583                  | hypothetical protein X975 17375 partial                                     | custom                 |
| NA                       | 7590                  | Cleavage stimulation factor subunit 3 partial                               | custom                 |
| NA                       | 7592                  | Transmembrane protein 8A partial                                            | custom                 |
| 90403                    | 7600                  | Vesicle transport through interaction with t-SNAREs-like protein 1A partial | custom                 |
| NA                       | 7604                  | ADP-ribosylation factor-like protein 6-interacting protein 1 partial        | custom                 |
| NA                       | 7607                  | Actin-related protein 2/3 complex subunit 5 partial                         | custom                 |
| NA                       | 7612                  | Transcription factor Sp9 partial                                            | custom                 |
| NA                       | 7623                  | Protein spaetzle partial                                                    | custom                 |
| NA                       | 7625                  | DNA replication complex GINS protein SLD5 partial                           | custom                 |
| 89809                    | 7663                  | Ribosome biogenesis protein BRX1-like protein partial                       | custom                 |
| NA                       | 7664                  | hypothetical protein X975 24843 partial                                     | custom                 |
| NA                       | 7665                  | GPI-anchor transamidase partial                                             | custom                 |
| NA                       | 7666                  | Ras-related protein Rab-23 partial                                          | custom                 |
| NA                       | 7667                  | Xaa-Pro dipeptidase partial                                                 | custom                 |
| NA                       | 7669                  | Protein misato-like protein partial                                         | custom                 |
| NA                       | 7670                  | Ribosomal RNA-processing protein 8 partial                                  | custom                 |
| NA                       | 7671                  | WD repeat and HMG-box DNA-binding protein 1 partial                         | custom                 |

**Supplemental Table 3 – continued from previous page**

| <b>Arthropod Core ID</b> | <b>Spider Core ID</b> | <b>Putative Ortholog Description</b>                                                | <b>Target Database</b> |
|--------------------------|-----------------------|-------------------------------------------------------------------------------------|------------------------|
| NA                       | 7672                  | YrdC domain-containing protein mitochondrial partial                                | custom                 |
| NA                       | 7673                  | hypothetical protein X975 10626 partial                                             | custom                 |
| NA                       | 7674                  | NAD-dependent lysine demalonylase and desuccinylase sirtuin-5 mitochondrial partial | custom                 |
| NA                       | 7679                  | Hermansky-Pudlak syndrome 3 protein-like protein partial                            | custom                 |
| NA                       | 7680                  | Glutamyl aminopeptidase partial                                                     | custom                 |
| NA                       | 7682                  | KIF1-binding protein-like protein partial                                           | custom                 |
| NA                       | 7683                  | DNA mismatch repair protein Mlh3 partial                                            | custom                 |
| NA                       | 7684                  | Dephospho-CoA kinase domain-containing protein partial                              | custom                 |
| NA                       | 7685                  | Importin-13 partial                                                                 | custom                 |
| NA                       | 7686                  | G protein-coupled receptor kinase 5 partial                                         | custom                 |
| NA                       | 7687                  | Intraflagellar transport protein 81-like protein partial                            | custom                 |
| NA                       | 7689                  | hypothetical protein X975 18367 partial                                             | custom                 |
| NA                       | 7690                  | Eukaryotic translation initiation factor 4E partial                                 | custom                 |
| NA                       | 7692                  | DNA-directed RNA polymerase II subunit RPB7 partial                                 | custom                 |
| NA                       | 7693                  | Tudor domain-containing protein 5 partial                                           | custom                 |
| 90239                    | 7694                  | 60S ribosomal protein L19 partial                                                   | custom                 |
| NA                       | 7695                  | Rab-like protein 5 partial                                                          | custom                 |

**Supplemental Table 3 – continued from previous page**

| <b>Arthropod Core ID</b> | <b>Spider Core ID</b> | <b>Putative Ortholog Description</b>                                  | <b>Target Database</b> |
|--------------------------|-----------------------|-----------------------------------------------------------------------|------------------------|
| NA                       | 7696                  | Eukaryotic translation initiation factor 4E-binding protein 1 partial | custom                 |
| NA                       | 7697                  | GATA zinc finger domain-containing protein 1 partial                  | custom                 |
| 90430                    | 7698                  | putative small nuclear ribonucleoprotein Sm D2 partial                | custom                 |
| 89671                    | 7699                  | 60S ribosomal protein L18 partial                                     | custom                 |
| 90361                    | 7702                  | PREDICTED: 40S ribosomal protein S8-like                              | nr                     |
| 89966                    | 7703                  | 60S ribosomal protein L44 partial                                     | custom                 |
| NA                       | 7704                  | GTP-binding protein 8 partial                                         | custom                 |
| NA                       | 7705                  | Coiled-coil domain-containing protein 58 partial                      | custom                 |
| NA                       | 7706                  | FRAS1-related extracellular matrix protein 1 partial                  | custom                 |
| NA                       | 7708                  | Transcription initiation factor IIA subunit 2 partial                 | custom                 |
| NA                       | 7709                  | U6 snRNA-associated Sm-like protein LSm7 partial                      | custom                 |
| NA                       | 7710                  | hypothetical protein X975 05234 partial                               | custom                 |
| NA                       | 7711                  | hypothetical protein X975 07387 partial                               | custom                 |
| NA                       | 7712                  | hypothetical protein X975 00393 partial                               | custom                 |
| NA                       | 7713                  | hypothetical protein X975 20400 partial                               | custom                 |
| NA                       | 7714                  | N-alpha-acetyltransferase 10 partial                                  | custom                 |
| NA                       | 7715                  | hypothetical protein X975 12171 partial                               | custom                 |
| NA                       | 7716                  | Asparagine synthetase domain-containing protein 1 partial             | custom                 |

**Supplemental Table 3 – continued from previous page**

| <b>Arthropod Core ID</b> | <b>Spider Core ID</b> | <b>Putative Ortholog Description</b>                                   | <b>Target Database</b> |
|--------------------------|-----------------------|------------------------------------------------------------------------|------------------------|
| 90416                    | 7717                  | Disintegrin and metalloproteinase domain-containing protein 10 partial | custom                 |
| NA                       | 7718                  | hypothetical protein X975 10055 partial                                | custom                 |
| NA                       | 7719                  | Alanine-tRNA ligase mitochondrial partial                              | custom                 |
| NA                       | 7720                  | Poly(ADP-ribose) glycohydrolase ARH3 partial                           | custom                 |
| NA                       | 7721                  | Biogenesis of lysosome-related organelles complex 1 subunit 2 partial  | custom                 |
| NA                       | 7730                  | hypothetical protein X975 18919 partial                                | custom                 |
| NA                       | 7742                  | INO80 complex subunit B partial                                        | custom                 |
| NA                       | 7761                  | Heat shock protein 67B2 partial                                        | custom                 |
| NA                       | 7765                  | Serine/arginine-rich splicing factor 7 partial                         | custom                 |
| NA                       | 7771                  | DnaJ-like protein subfamily C member 30 partial                        | custom                 |
| NA                       | 7773                  | 28S ribosomal protein S18a mitochondrial partial                       | custom                 |
| NA                       | 7774                  | Syntaxin-7 partial                                                     | custom                 |
| NA                       | 7779                  | putative peptidyl-tRNA hydrolase PTRHD1 partial                        | custom                 |
| NA                       | 7780                  | 28S ribosomal protein S33 mitochondrial partial                        | custom                 |
| 89923                    | 7781                  | Cytochrome c oxidase subunit 5B mitochondrial partial                  | custom                 |
| NA                       | 7782                  | Receptor expression-enhancing protein 4 partial                        | custom                 |
| NA                       | 7784                  | hypothetical protein X975 25077 partial                                | custom                 |
| 90405                    | 7787                  | 3-hydroxyacyl-CoA dehydratase 1 partial                                | custom                 |

**Supplemental Table 3 – continued from previous page**

| <b>Arthropod Core ID</b> | <b>Spider Core ID</b> | <b>Putative Ortholog Description</b>                                      | <b>Target Database</b> |
|--------------------------|-----------------------|---------------------------------------------------------------------------|------------------------|
| NA                       | 7794                  | Ribonuclease H2 sub-unit C partial                                        | custom                 |
| NA                       | 7799                  | Protein spaetzle partial                                                  | custom                 |
| NA                       | 7804                  | PREDICTED:<br>all-trans retinoic acid-induced differentiation factor-like | nr                     |
| NA                       | 7809                  | hypothetical protein X975 01033 partial                                   | custom                 |
| NA                       | 7816                  | NA                                                                        | nr                     |
| NA                       | 7837                  | Glutathione S-transferase 1 partial                                       | custom                 |
| NA                       | 7845                  | hypothetical protein X975 07973 partial                                   | custom                 |
| NA                       | 7847                  | Immunoglobulin superfamily containing leucine-rich repeat protein partial | custom                 |
| NA                       | 7857                  | hypothetical protein X975 14061 partial                                   | custom                 |
| NA                       | 7860                  | Thioredoxin-like protein 4B partial                                       | custom                 |
| NA                       | 7890                  | Fibroblast growth factor receptor-like 1 partial                          | custom                 |
| NA                       | 7896                  | Peroxisomal membrane protein PEX14 partial                                | custom                 |
| NA                       | 7897                  | Rab GTPase-binding effector protein 1 partial                             | custom                 |
| NA                       | 7899                  | Trafficking protein particle complex subunit 1 partial                    | custom                 |
| NA                       | 7900                  | DNA repair protein complementing XP-A cells-like protein partial          | custom                 |
| NA                       | 7902                  | Techylectin-5A partial                                                    | custom                 |
| NA                       | 7903                  | La-related protein 7 partial                                              | custom                 |
| NA                       | 7908                  | Receptor-binding cancer antigen partial                                   | custom                 |
| NA                       | 7921                  | PREDICTED:<br>UPF0669 protein C6orf120 homolog                            | nr                     |

**Supplemental Table 3 – continued from previous page**

| <b>Arthropod Core ID</b> | <b>Spider Core ID</b> | <b>Putative Ortholog Description</b>                    | <b>Target Database</b> |
|--------------------------|-----------------------|---------------------------------------------------------|------------------------|
| NA                       | 7923                  | 3-phosphoinositide-dependent protein kinase 1 partial   | custom                 |
| NA                       | 7933                  | Ras-related protein Rab-27A partial                     | custom                 |
| NA                       | 7953                  | hypothetical protein X975 19126 partial                 | custom                 |
| NA                       | 7968                  | PREDICTED: RNA polymerase II elongation factor ELL-like | nr                     |
| NA                       | 7969                  | N-acylneuraminate-9-phosphatase partial                 | custom                 |
| NA                       | 7972                  | Retinol dehydrogenase 3 partial                         | custom                 |
| NA                       | 7973                  | hypothetical protein X975 12626 partial                 | custom                 |
| NA                       | 7974                  | hypothetical protein X975 25143 partial                 | custom                 |
| NA                       | 7975                  | Ribonuclease P protein subunit p30 partial              | custom                 |
| NA                       | 7976                  | PREDICTED: transcription and mRNA export factor ENY2    | nr                     |
| NA                       | 7977                  | General transcription factor 3C polypeptide 6 partial   | custom                 |
| NA                       | 7982                  | putative nuclease HARB11 partial                        | custom                 |
| NA                       | 7983                  | Death domain-associated protein 6 partial               | custom                 |
| NA                       | 7984                  | U11/U12 small nuclear ribonucleoprotein partial         | custom                 |
| NA                       | 7988                  | Cell division cycle protein 20-like protein partial     | custom                 |
| NA                       | 7991                  | Transmembrane protein 222 partial                       | custom                 |
| NA                       | 7997                  | Alpha-tocopherol transfer protein-like protein partial  | custom                 |
| NA                       | 8003                  | Peroxisome assembly protein 12 partial                  | custom                 |
| NA                       | 8008                  | G-protein coupled receptor Mth2 partial                 | custom                 |



Supplemental Table 3 – continued from previous page

| Arthropod Core ID | Spider Core ID | Putative Ortholog Description                                         | Target Database |
|-------------------|----------------|-----------------------------------------------------------------------|-----------------|
| NA                | 8013           | Chromodomain Y-like protein partial                                   | custom          |
| 89670             | 8015           | PREDICTED: 40S ribosomal protein S12, mitochondrial-like              | nr              |
| NA                | 8020           | Protein FAM114A2 partial                                              | custom          |
| NA                | 8024           | hypothetical protein X975 05541 partial                               | custom          |
| NA                | 8034           | hypothetical protein X975 08854 partial                               | custom          |
| NA                | 8037           | UDP-GalNAc:beta-13-N-acetylgalactosaminyltransferase 2 partial        | custom          |
| NA                | 8043           | tRNA 2'-phosphotransferase 1 partial                                  | custom          |
| NA                | 8063           | hypothetical protein X975 24139 partial                               | custom          |
| 90391             | 8070           | Alanine aminotransferase 2 partial                                    | custom          |
| NA                | 8073           | hypothetical protein X975 20395 partial                               | custom          |
| NA                | 8075           | Renalase partial                                                      | custom          |
| NA                | 8080           | UPF0047 protein yjbQ partial                                          | custom          |
| NA                | 8083           | Exportin-6 partial                                                    | custom          |
| NA                | 8086           | Acyl carrier protein mitochondrial partial                            | custom          |
| NA                | 8091           | Tryptophan-tRNA ligase mitochondrial partial                          | custom          |
| NA                | 8094           | Glutamate-gated chloride channel partial                              | custom          |
| NA                | 8104           | 39S ribosomal protein L43 mitochondrial partial                       | custom          |
| NA                | 8110           | hypothetical protein X975 11725 partial                               | custom          |
| NA                | 8112           | Single-strand selective monofunctional uracil DNA glycosylase partial | custom          |
| NA                | 8113           | Intraflagellar transport protein 27-like protein partial              | custom          |

**Supplemental Table 3 – continued from previous page**

| <b>Arthropod Core ID</b> | <b>Spider Core ID</b> | <b>Putative Ortholog Description</b>                                       | <b>Target Database</b> |
|--------------------------|-----------------------|----------------------------------------------------------------------------|------------------------|
| 89756                    | 8118                  | Rho GTPase-activating protein 1 partial                                    | custom                 |
| NA                       | 8129                  | Transmembrane channel-like protein 7 partial                               | custom                 |
| NA                       | 8141                  | Protein farnesyltransferase subunit beta partial                           | custom                 |
| NA                       | 8145                  | hypothetical protein X975 23521 partial                                    | custom                 |
| NA                       | 8149                  | Ankyrin repeat and SAM domain-containing protein 6 partial                 | custom                 |
| NA                       | 8151                  | Serine/threonine-protein kinase Nek1 partial                               | custom                 |
| NA                       | 8153                  | rho gtpase-activating protein 20                                           | nr                     |
| NA                       | 8155                  | Transmembrane protein 185B partial                                         | custom                 |
| NA                       | 8157                  | Cysteine protease ATG4C partial                                            | custom                 |
| NA                       | 8158                  | cAMP-regulated phosphoprotein 21 partial                                   | custom                 |
| 89941                    | 8159                  | Mitochondrial intermembrane space import and assembly protein 40-B partial | custom                 |
| NA                       | 8161                  | Selenocysteine-specific elongation factor partial                          | custom                 |
| NA                       | 8164                  | TM2 domain-containing protein partial                                      | custom                 |
| NA                       | 8168                  | Mitochondrial inner membrane protease ATP23-like protein partial           | custom                 |
| NA                       | 8178                  | Laminin subunit alpha-2 partial                                            | custom                 |
| NA                       | 8181                  | PREDICTED: vacuolar protein-sorting-associated protein 36-like             | nr                     |
| NA                       | 8187                  | hypothetical protein X975 26977 partial                                    | custom                 |

**Supplemental Table 3 – continued from previous page**

| <b>Arthropod Core ID</b> | <b>Spider Core ID</b> | <b>Putative Ortholog Description</b>                                  | <b>Target Database</b> |
|--------------------------|-----------------------|-----------------------------------------------------------------------|------------------------|
| NA                       | 8197                  | hypothetical protein X975 01071 partial                               | custom                 |
| NA                       | 8203                  | Mitochondrial fission process protein 1 partial                       | custom                 |
| NA                       | 8208                  | Fatty acid-binding protein partial                                    | custom                 |
| NA                       | 8216                  | hypothetical protein X975 09663 partial                               | custom                 |
| NA                       | 8222                  | Cytoplasmic tRNA 2-thiolation protein 2 B partial                     | custom                 |
| NA                       | 8226                  | tRNA-splicing endonuclease subunit Sen2 partial                       | custom                 |
| NA                       | 8227                  | Serine-tRNA ligase partial                                            | custom                 |
| NA                       | 8237                  | GTP-binding protein SAR1b partial                                     | custom                 |
| NA                       | 8239                  | ADP-ribosylation factor 1 partial                                     | custom                 |
| NA                       | 8269                  | Zinc finger protein 36 C3H1 type-like 1 partial                       | custom                 |
| NA                       | 8281                  | Protein NDNF partial                                                  | custom                 |
| NA                       | 8290                  | Methyltransferase-like protein 21D partial                            | custom                 |
| NA                       | 8296                  | Transmembrane protein 63B partial                                     | custom                 |
| NA                       | 8302                  | RNA pseudouridylate synthase domain-containing protein 1 partial      | custom                 |
| NA                       | 8307                  | Intraflagellar transport protein 172-like protein partial             | custom                 |
| NA                       | 8311                  | Acidic leucine-rich nuclear phosphoprotein 32 family member A partial | custom                 |
| NA                       | 8312                  | HEAT repeat-containing protein 1 partial                              | custom                 |
| NA                       | 8313                  | Sulfotransferase family cytosolic 1B member 1 partial                 | custom                 |

**Supplemental Table 3 – continued from previous page**

| <b>Arthropod Core ID</b> | <b>Spider Core ID</b> | <b>Putative Ortholog Description</b>                        | <b>Target Database</b> |
|--------------------------|-----------------------|-------------------------------------------------------------|------------------------|
| NA                       | 8318                  | hypothetical protein X975 22437 partial                     | custom                 |
| NA                       | 8319                  | Transmembrane protein 70-like protein mitochondrial partial | custom                 |
| NA                       | 8325                  | hypothetical protein X975 24386 partial                     | custom                 |
| NA                       | 8331                  | 39S ribosomal protein L10 mitochondrial partial             | custom                 |
| NA                       | 8334                  | hypothetical protein X975 03325 partial                     | custom                 |
| NA                       | 8335                  | Pyruvate dehydrogenase protein X component partial          | custom                 |
| NA                       | 8340                  | Pleckstrin domain-containing family M member 3 partial      | custom                 |
| NA                       | 8344                  | hypothetical protein X975 24110 partial                     | custom                 |
| 90025                    | 8371                  | Rap guanine nucleotide exchange factor 1 partial            | custom                 |
| NA                       | 8376                  | Protein UBASH3A-like protein partial                        | custom                 |
| NA                       | 8387                  | Glycosyltransferase-like protein LARGE2 partial             | custom                 |
| 90547                    | 8392                  | CAD protein partial                                         | custom                 |
| NA                       | 8408                  | tRNA (cytosine-5-)-methyltransferase partial                | custom                 |
| NA                       | 8410                  | Protein N-terminal glutamine amidohydrolase partial         | custom                 |
| NA                       | 8411                  | Fibronectin type-III domain-containing protein 3A partial   | custom                 |
| NA                       | 8429                  | Uracil-DNA glycosylase partial                              | custom                 |
| NA                       | 8432                  | hypothetical protein X975 21317 partial                     | custom                 |
| NA                       | 8436                  | Nuclear speckle splicing regulatory protein 1 partial       | custom                 |
| NA                       | 8437                  | PREDICTED: DNA damage-binding protein 2-like isoform        | nr                     |

**Supplemental Table 3 – continued from previous page**

| <b>Arthropod Core ID</b> | <b>Spider Core ID</b> | <b>Putative Ortholog Description</b>                                 | <b>Target Database</b> |
|--------------------------|-----------------------|----------------------------------------------------------------------|------------------------|
| NA                       | 8438                  | hypothetical protein X975 18516 partial                              | custom                 |
| NA                       | 8440                  | Mannose-1-phosphate guanyl-transferase beta-A partial                | custom                 |
| NA                       | 8441                  | Target of rapamycin complex 2 subunit MAPKAP1 partial                | custom                 |
| NA                       | 8446                  | Transmembrane and ubiquitin-like domain-containing protein 1 partial | custom                 |
| NA                       | 8449                  | 2-aminoethanethiol dioxygenase partial                               | custom                 |
| NA                       | 8450                  | Transcription elongation factor SPT4 partial                         | custom                 |
| NA                       | 8455                  | Diacylglycerol O-acyltransferase 1 partial                           | custom                 |
| NA                       | 8460                  | Exosome complex component MTR3 partial                               | custom                 |
| NA                       | 8468                  | COMM domain-containing protein 4 partial                             | custom                 |
| NA                       | 8473                  | hypothetical protein X975 15998 partial                              | custom                 |
| NA                       | 8497                  | Chondroitin proteoglycan-2 partial                                   | custom                 |
| NA                       | 8512                  | hypothetical protein X975 19816 partial                              | custom                 |
| NA                       | 8518                  | FIT family protein partial                                           | custom                 |
| NA                       | 8519                  | Epithelial splicing regulatory protein 2 partial                     | custom                 |
| NA                       | 8566                  | Valine-tRNA ligase partial                                           | custom                 |
| 90210                    | 8569                  | Surfeit locus protein 4-like protein partial                         | custom                 |
| NA                       | 8570                  | hypothetical protein X975 12389 partial                              | custom                 |
| NA                       | 8571                  | hypothetical protein X975 20990 partial                              | custom                 |

**Supplemental Table 3 – continued from previous page**

| <b>Arthropod Core ID</b> | <b>Spider Core ID</b> | <b>Putative Ortholog Description</b>                             | <b>Target Database</b> |
|--------------------------|-----------------------|------------------------------------------------------------------|------------------------|
| 89903                    | 8573                  | Transcription initiation factor TFIIID subunit 13 partial        | custom                 |
| NA                       | 8574                  | Rho guanine nucleotide exchange factor 17 partial                | custom                 |
| NA                       | 8575                  | hypothetical protein X975 26350 partial                          | custom                 |
| NA                       | 8576                  | E3 SUMO-protein ligase PIAS2 partial                             | custom                 |
| NA                       | 8577                  | Tail-anchored protein insertion receptor WRB partial             | custom                 |
| 90159                    | 8579                  | Sodium/glucose co-transporter 1 partial                          | custom                 |
| NA                       | 8580                  | TGF-beta-activated kinase 1 and MAP3K7-binding protein 1 partial | custom                 |
| NA                       | 8581                  | Nephrocystin-1 partial                                           | custom                 |
| NA                       | 8584                  | Gamma-tubulin complex component 2 partial                        | custom                 |
| NA                       | 8586                  | DNA polymerase delta subunit 3 partial                           | custom                 |
| NA                       | 8590                  | Ankyrin repeat and MYND domain-containing protein 2 partial      | custom                 |
| NA                       | 8592                  | Formimidoyltransferase-cyclodeaminase partial                    | custom                 |
| NA                       | 8593                  | Golgin subfamily A member 3 partial                              | custom                 |
| NA                       | 8594                  | putative palmitoyl-transferase ZDHHC6 partial                    | custom                 |
| NA                       | 8597                  | Mitochondrial inner membrane protease subunit 1 partial          | custom                 |
| NA                       | 8598                  | Alkylated DNA repair protein alkB-like protein partial           | custom                 |
| NA                       | 8599                  | hypothetical protein X975 17379 partial                          | custom                 |
| NA                       | 8606                  | conserved hypothetical protein                                   | nr                     |

Supplemental Table 3 – continued from previous page

| Arthropod Core ID | Spider Core ID | Putative Ortholog Description                                               | Target Database |
|-------------------|----------------|-----------------------------------------------------------------------------|-----------------|
| NA                | 8607           | Nephrin partial                                                             | custom          |
| NA                | 8610           | NADH dehydrogenase [ubiquinone] iron-sulfur protein 6 mitochondrial partial | custom          |
| NA                | 8611           | 60S ribosomal protein L34 partial                                           | custom          |
| NA                | 8613           | Protein MTO1-like protein mitochondrial partial                             | custom          |
| NA                | 8614           | Ras-like GTP-binding protein rhoA partial                                   | custom          |
| NA                | 8615           | Acyl-CoA-binding domain-containing protein 5-B partial                      | custom          |
| NA                | 8616           | Craniofacial development protein 1 partial                                  | custom          |
| NA                | 8617           | Nesprin-2 partial                                                           | custom          |
| NA                | 8618           | Mitochondrial inner membrane protease subunit 2 partial                     | custom          |
| 89757             | 8619           | hypothetical protein X975 14513 partial                                     | custom          |
| NA                | 8621           | D-beta-hydroxybutyrate dehydrogenase mitochondrial partial                  | custom          |
| NA                | 8623           | hypothetical protein X975 00429 partial                                     | custom          |
| NA                | 8625           | Methylmalonic aciduria type A-like protein mitochondrial partial            | custom          |
| NA                | 8626           | Ras association domain-containing protein 1 partial                         | custom          |
| NA                | 8627           | Protein FRA10AC1-like protein partial                                       | custom          |
| NA                | 8628           | p53-induced protein with a death partial                                    | custom          |
| NA                | 8631           | PREDICTED: CDK-activating kinase assembly factor MAT1-like                  | nr              |
| NA                | 8632           | putative tyrosine-tRNA ligase mitochondrial partial                         | custom          |

Supplemental Table 3 – continued from previous page

| Arthropod Core ID | Spider Core ID | Putative Ortholog Description                                                   | Target Database |
|-------------------|----------------|---------------------------------------------------------------------------------|-----------------|
| NA                | 8633           | Histone acetyltransferase KAT2B partial                                         | custom          |
| NA                | 8635           | PREDICTED:<br>ADP-ribosylation factor-like protein<br>2-binding protein isoform | nr              |
| NA                | 8636           | CaiB/baiF CoA-transferase family protein partial                                | custom          |
| NA                | 8638           | WD repeat-containing protein 92 partial                                         | custom          |
| NA                | 8667           | hypothetical protein X975 08855 partial                                         | custom          |
| NA                | 8719           | hypothetical protein X975 01092 partial                                         | custom          |
| NA                | 8728           | Transmembrane protein 14C partial                                               | custom          |
| NA                | 8731           | Heterogeneous nuclear ribonucleoprotein 27C partial                             | custom          |
| NA                | 8733           | Zinc finger CCCH domain-containing protein 11A partial                          | custom          |
| NA                | 8735           | 2'5'-phosphodiesterase 12 partial                                               | custom          |
| NA                | 8818           | Papilin partial                                                                 | custom          |
| NA                | 8880           | PREDICTED: protein FAM206A                                                      | nr              |
| NA                | 8882           | Protein spaetzle partial                                                        | custom          |
| NA                | 8912           | P3 protein partial                                                              | custom          |
| NA                | 8956           | Ubiquitin-conjugating enzyme E2 partial                                         | custom          |
| NA                | 8957           | Glutaredoxin-2 mitochondrial partial                                            | custom          |
| NA                | 8961           | hypothetical protein X975 22064 partial                                         | custom          |
| NA                | 8979           | Tryptase partial                                                                | custom          |
| NA                | 8980           | Chitotriosidase-1 partial                                                       | custom          |
| NA                | 8982           | GA-binding protein alpha chain partial                                          | custom          |



**Supplemental Table 3 – continued from previous page**

| <b>Arthropod Core ID</b> | <b>Spider Core ID</b> | <b>Putative Ortholog Description</b>                                     | <b>Target Database</b> |
|--------------------------|-----------------------|--------------------------------------------------------------------------|------------------------|
| NA                       | 9039                  | hypothetical protein X975 10811 partial                                  | custom                 |
| NA                       | 9045                  | putative RNA polymerase II nuclear localization protein SLC7A6OS partial | custom                 |
| NA                       | 9047                  | Zinc finger matrin-type protein 5 partial                                | custom                 |
| NA                       | 9057                  | PREDICTED: cyclin-dependent kinase 2-interacting protein                 | nr                     |
| NA                       | 9060                  | Transmembrane protein 120-like protein partial                           | custom                 |
| NA                       | 9072                  | Protein BTG2 partial                                                     | custom                 |
| NA                       | 9073                  | Fanconi-associated nuclease 1 partial                                    | custom                 |
| NA                       | 9077                  | NA                                                                       | nr                     |
| NA                       | 9081                  | Required for meiotic nuclear division protein 1-like protein partial     | custom                 |
| NA                       | 9109                  | GTP-binding protein Rit1 partial                                         | custom                 |
| NA                       | 9118                  | Peptidoglycan-recognition protein SC2 partial                            | custom                 |
| NA                       | 9120                  | Beta-14-N-acetylgalactosaminyltransferase bre-4 partial                  | custom                 |
| NA                       | 9124                  | Globin partial                                                           | custom                 |
| NA                       | 9132                  | PREDICTED: myosin heavy chain, muscle-like                               | nr                     |
| NA                       | 9143                  | hypothetical protein X975 18827 partial                                  | custom                 |
| NA                       | 9183                  | hypothetical protein X975 19496 partial                                  | custom                 |
| NA                       | 9188                  | putative ribosome-binding factor A mitochondrial partial                 | custom                 |
| NA                       | 9202                  | Secernin-2 partial                                                       | custom                 |
| NA                       | 9203                  | Innexin inx2 partial                                                     | custom                 |
| NA                       | 9212                  | hypothetical protein X975 19700 partial                                  | custom                 |
| NA                       | 9234                  | AMME syndrome candidate 1 protein-like protein partial                   | custom                 |

Supplemental Table 3 – continued from previous page

| Arthropod Core ID | Spider Core ID | Putative Ortholog Description                              | Target Database |
|-------------------|----------------|------------------------------------------------------------|-----------------|
| NA                | 9249           | Tyrosine-protein phosphatase Lar partial                   | custom          |
| NA                | 9283           | Histone-lysine N-methyltransferase SUV420H1-A partial      | custom          |
| NA                | 9298           | Transposable element Hobo transposase partial              | custom          |
| NA                | 9309           | Round spermatid basic protein 1-like protein partial       | custom          |
| NA                | 9318           | tRNA-specific adenosine deaminase-like protein 3 partial   | custom          |
| NA                | 9326           | ADP-ribosylation factor 4 partial                          | custom          |
| NA                | 9352           | Cytosolic endo-beta-N-acetylglucosaminidase partial        | custom          |
| NA                | 9357           | Activating signal cointegrator 1 complex subunit 3 partial | custom          |
| NA                | 9358           | hypothetical protein X975 17122 partial                    | custom          |
| 90579             | 9359           | G2/mitotic-specific cyclin-B3 partial                      | custom          |
| NA                | 9405           | DNA repair protein XRCC4 partial                           | custom          |
| NA                | 9435           | DNA-directed RNA polymerase I subunit RPA49 partial        | custom          |
| NA                | 9449           | Ribonuclease P protein subunit p20 partial                 | custom          |
| NA                | 9455           | Protein BTG1 partial                                       | custom          |
| NA                | 9466           | putative ATP-dependent RNA helicase DDX4 partial           | custom          |
| NA                | 9486           | Leucine-rich repeat-containing protein partial             | custom          |
| NA                | 9496           | Lysosomal Pro-X carboxypeptidase partial                   | custom          |
| NA                | 9522           | NA                                                         | nr              |

**Supplemental Table 3 – continued from previous page**

| <b>Arthropod Core ID</b> | <b>Spider Core ID</b> | <b>Putative Ortholog Description</b>                                     | <b>Target Database</b> |
|--------------------------|-----------------------|--------------------------------------------------------------------------|------------------------|
| NA                       | 9533                  | Ataxin-10 partial                                                        | custom                 |
| NA                       | 9618                  | FERM and PDZ domain-containing protein 4 partial                         | custom                 |
| NA                       | 9619                  | Cob(D)yrinic acid ac-diamide adenosyltransferase mitochondrial partial   | custom                 |
| NA                       | 9621                  | Poly(A) RNA polymerase mitochondrial partial                             | custom                 |
| NA                       | 9622                  | Tectonic-3 partial                                                       | custom                 |
| NA                       | 9627                  | Ninjurin-1 partial                                                       | custom                 |
| NA                       | 9629                  | Ubiquitin carboxyl-terminal hydrolase 3 partial                          | custom                 |
| NA                       | 9632                  | F-box only protein 28 partial                                            | custom                 |
| 90201                    | 9637                  | PREDICTED: PHD finger-like domain-containing protein 5A                  | nr                     |
| NA                       | 9643                  | Synaptophysin partial                                                    | custom                 |
| NA                       | 9644                  | RecQ-mediated genome instability protein 1 partial                       | custom                 |
| NA                       | 9645                  | Trafficking protein particle complex subunit 2 partial                   | custom                 |
| NA                       | 9647                  | Repulsive guidance molecule A partial                                    | custom                 |
| NA                       | 9648                  | Ethanolaminephosphotransferase 1 partial                                 | custom                 |
| NA                       | 9652                  | A disintegrin and metalloproteinase with thrombospondin motifs 7 partial | custom                 |
| NA                       | 9653                  | F-box only protein 22 partial                                            | custom                 |
| NA                       | 9654                  | Peroxisomal membrane protein 11B partial                                 | custom                 |
| NA                       | 9656                  | hypothetical protein X975 26154 partial                                  | custom                 |
| NA                       | 9658                  | RNA-binding protein 26 partial                                           | custom                 |
| NA                       | 9662                  | hypothetical protein X975 22098 partial                                  | custom                 |

Supplemental Table 3 – continued from previous page

| Arthropod Core ID | Spider Core ID | Putative Ortholog Description                                          | Target Database |
|-------------------|----------------|------------------------------------------------------------------------|-----------------|
| NA                | 9664           | Rhomboid-related protein 3 partial                                     | custom          |
| NA                | 9665           | Disintegrin and metalloproteinase domain-containing protein 23 partial | custom          |
| NA                | 9674           | Trifunctional nucleotide phosphoesterase protein YfkN partial          | custom          |
| NA                | 9680           | hypothetical protein X975 15151 partial                                | custom          |
| NA                | 9685           | HRAS-like suppressor partial                                           | custom          |
| NA                | 9690           | WD repeat domain-containing protein 83 partial                         | custom          |
| NA                | 9691           | Serine/threonine-protein kinase LMTK1 partial                          | custom          |
| 89998             | 9693           | Protein jagunal partial                                                | custom          |
| NA                | 9695           | DNA (cytosine-5)-methyltransferase PliMCI partial                      | custom          |
| NA                | 9696           | Acylphosphatase-2 partial                                              | custom          |
| NA                | 9697           | 39S ribosomal protein L14 mitochondrial partial                        | custom          |
| NA                | 9699           | Integrator complex subunit 5 partial                                   | custom          |
| 89889             | 9700           | Helicase SKI2W partial                                                 | custom          |
| NA                | 9702           | Uroporphyrinogen decarboxylase partial                                 | custom          |
| NA                | 9703           | ATP synthase lipid-binding protein mitochondrial partial               | custom          |
| NA                | 9707           | 39S ribosomal protein L21 mitochondrial partial                        | custom          |
| NA                | 9709           | putative arginine-tRNA ligase mitochondrial partial                    | custom          |
| NA                | 9713           | Myosin regulatory light chain 2 partial                                | custom          |

**Supplemental Table 3 – continued from previous page**

| <b>Arthropod Core ID</b> | <b>Spider Core ID</b> | <b>Putative Ortholog Description</b>                       | <b>Target Database</b> |
|--------------------------|-----------------------|------------------------------------------------------------|------------------------|
| NA                       | 9719                  | Protein lin-54-like protein partial                        | custom                 |
| NA                       | 9720                  | Trafficking protein particle complex subunit 5 partial     | custom                 |
| NA                       | 9721                  | Calmodulin-like protein 4 partial                          | custom                 |
| NA                       | 9787                  | NA                                                         | nr                     |
| NA                       | 9852                  | Integrin alpha-PS1 partial                                 | custom                 |
| NA                       | 10030                 | STAM-binding protein-like A partial                        | custom                 |
| NA                       | 10236                 | Telomere-associated protein RIF1 partial                   | custom                 |
| NA                       | 10568                 | DNA-directed RNA polymerase mitochondrial partial          | custom                 |
| NA                       | 10569                 | Kalirin partial                                            | custom                 |
| NA                       | 10628                 | Three prime repair exonuclease 2 partial                   | custom                 |
| NA                       | 10673                 | Germ cell-less protein-like 1 partial                      | custom                 |
| NA                       | 11025                 | Calcium/calmodulin-dependent protein kinase type 1 partial | custom                 |
| NA                       | 11028                 | 28S ribosomal protein S18b mitochondrial partial           | custom                 |
| NA                       | 11033                 | Transmembrane protein 173 partial                          | custom                 |
| NA                       | 11034                 | hypothetical protein X975 22111 partial                    | custom                 |
| NA                       | 11035                 | hypothetical protein X975 20920 partial                    | custom                 |
| NA                       | 11036                 | PREDICTED: uncharacterized protein LOC106462232            | nr                     |
| NA                       | 11038                 | hypothetical protein X975 19857 partial                    | custom                 |
| NA                       | 11039                 | hypothetical protein X975 20897 partial                    | custom                 |
| NA                       | 11042                 | Heat shock protein beta-11 partial                         | custom                 |
| NA                       | 11046                 | PREDICTED: uncharacterized protein LOC106468561            | nr                     |

Supplemental Table 3 – continued from previous page

| Arthropod Core ID | Spider Core ID | Putative Ortholog Description                                       | Target Database |
|-------------------|----------------|---------------------------------------------------------------------|-----------------|
| NA                | 11048          | Dermal papilla-derived protein 6-like protein partial               | custom          |
| NA                | 11052          | CCAAT/enhancer-binding protein gamma partial                        | custom          |
| NA                | 11053          | NA                                                                  | nr              |
| NA                | 11056          | CTD small phosphatase-like protein 2 partial                        | custom          |
| NA                | 11058          | Chaperone protein DnaJ partial                                      | custom          |
| NA                | 11059          | CAP-Gly domain-containing linker protein 4 partial                  | custom          |
| NA                | 11060          | Peptidyl-prolyl cis-trans isomerase FKBP6 partial                   | custom          |
| NA                | 11061          | Glycolipid transfer protein domain-containing protein 1 partial     | custom          |
| NA                | 11062          | N-acyl-phosphatidylethanolamine-hydrolyzing phospholipase D partial | custom          |
| NA                | 11063          | Serine-tRNA ligase mitochondrial partial                            | custom          |
| NA                | 11067          | hypothetical protein X975 07422 partial                             | custom          |
| NA                | 11069          | Toll-interacting protein partial                                    | custom          |
| NA                | 11072          | Oxysterol-binding protein-related protein 11 partial                | custom          |
| NA                | 11075          | hypothetical protein X975 14457 partial                             | custom          |
| NA                | 11077          | Zinc finger BED domain-containing protein 4 partial                 | custom          |
| NA                | 11080          | Ras-related C3 botulinum toxin substrate 1 partial                  | custom          |
| NA                | 11082          | Vacuolar protein-sorting-associated protein 25 partial              | custom          |
| NA                | 11085          | hypothetical protein X975 14012 partial                             | custom          |

**Supplemental Table 3 – continued from previous page**

| <b>Arthropod Core ID</b> | <b>Spider Core ID</b> | <b>Putative Ortholog Description</b>                                 | <b>Target Database</b> |
|--------------------------|-----------------------|----------------------------------------------------------------------|------------------------|
| NA                       | 11086                 | Werner syndrome ATP-dependent helicase partial                       | custom                 |
| NA                       | 11092                 | hypothetical protein X975 06161 partial                              | custom                 |
| NA                       | 11094                 | putative E3 ubiquitin-protein ligase MY-CBP2 partial                 | custom                 |
| NA                       | 11095                 | Monocarboxylate transporter 12 partial                               | custom                 |
| NA                       | 11098                 | Zinc finger protein 511 partial                                      | custom                 |
| NA                       | 11099                 | PREDICTED: anaphase-promoting complex subunit 4-like                 | nr                     |
| NA                       | 11102                 | hypothetical protein X975 19798 partial                              | custom                 |
| NA                       | 11111                 | hypothetical protein X975 13625 partial                              | custom                 |
| NA                       | 11112                 | hypothetical protein X975 13639 partial                              | custom                 |
| NA                       | 11117                 | Zonadhesin partial                                                   | custom                 |
| 90435                    | 11126                 | Mannose-P-dolichol utilization defect 1 protein-like protein partial | custom                 |
| NA                       | 11127                 | Small nuclear ribonucleoprotein-associated protein B partial         | custom                 |
| NA                       | 11136                 | putative 60S ribosomal protein L37-A partial                         | custom                 |
| 89706                    | 11139                 | Ras-related protein Rab-39B partial                                  | custom                 |
| NA                       | 11140                 | RNA-binding protein 48                                               | nr                     |
| 90501                    | 11141                 | Ras-related protein Rap-1b partial                                   | custom                 |
| NA                       | 11142                 | E3 ubiquitin-protein ligase SIAH1 partial                            | custom                 |
| NA                       | 11143                 | USP6 N-terminal-like protein partial                                 | custom                 |
| NA                       | 11144                 | Heterogeneous nuclear ribonucleoprotein F partial                    | custom                 |

**Supplemental Table 3 – continued from previous page**

| <b>Arthropod Core ID</b> | <b>Spider Core ID</b> | <b>Putative Ortholog Description</b>                       | <b>Target Database</b> |
|--------------------------|-----------------------|------------------------------------------------------------|------------------------|
| NA                       | 11147                 | hypothetical protein X975 06894 partial                    | custom                 |
| NA                       | 11148                 | putative exonuclease mut-7-like protein partial            | custom                 |
| NA                       | 11149                 | Tensin-1 partial                                           | custom                 |
| NA                       | 11155                 | hypothetical protein X975 05048 partial                    | custom                 |
| NA                       | 11156                 | Cell cycle checkpoint protein RAD1 partial                 | custom                 |
| NA                       | 11157                 | Protein DEK partial                                        | custom                 |
| NA                       | 11159                 | hypothetical protein X975 19611 partial                    | custom                 |
| NA                       | 11169                 | Transcription initiation protein SPT3-like protein partial | custom                 |
| NA                       | 11177                 | Regulator of microtubule dynamics protein 2 partial        | custom                 |
| NA                       | 11178                 | Kinetochore protein NDC80-like protein partial             | custom                 |
| NA                       | 11180                 | Poly [ADP-ribose] polymerase 1 partial                     | custom                 |
| NA                       | 11181                 | conserved hypothetical protein                             | nr                     |
| NA                       | 11183                 | putative asparagine-tRNA ligase mitochondrial partial      | custom                 |
