# Supplementary material for: Spider phylogenomics: untangling the Spider Tree of Life
Source: PeerJ. 2016 Feb 23;4:e1719. doi: 10.7717/peerj.1719 (PMC4768681; doi:10.7717/peerj.1719)
Supplement: Supplemental Information 1 [file peerj-04-1719-s015.txt]

AUTOF,	00356.fas =	1 - 238
AUTOF,	00358.fas =	239 - 391
AUTOF,	00359.fas =	392 - 481
AUTOF,	00360.fas =	482 - 692
AUTOF,	00363.fas =	693 - 903
AUTOF,	00365.fas =	904 - 1174
AUTOF,	00370.fas =	1175 - 1672
AUTOF,	00371.fas =	1673 - 1889
AUTOF,	00382.fas =	1890 - 2018
AUTOF,	00388.fas =	2019 - 2309
AUTOF,	00392.fas =	2310 - 2596
AUTOF,	00393.fas =	2597 - 2925
AUTOF,	00395.fas =	2926 - 3047
AUTOF,	00399.fas =	3048 - 3231
AUTOF,	00410.fas =	3232 - 3436
AUTOF,	00413.fas =	3437 - 3939
AUTOF,	00415.fas =	3940 - 4114
AUTOF,	00418.fas =	4115 - 4366
AUTOF,	00419.fas =	4367 - 4543
AUTOF,	00423.fas =	4544 - 4736
AUTOF,	00425.fas =	4737 - 4937
AUTOF,	00426.fas =	4938 - 5155
AUTOF,	00427.fas =	5156 - 5407
AUTOF,	00430.fas =	5408 - 5566
AUTOF,	00431.fas =	5567 - 5925
AUTOF,	00439.fas =	5926 - 6310
AUTOF,	00440.fas =	6311 - 6507
AUTOF,	00441.fas =	6508 - 6716
AUTOF,	00444.fas =	6717 - 6875
AUTOF,	00446.fas =	6876 - 6962
AUTOF,	00455.fas =	6963 - 7607
AUTOF,	00456.fas =	7608 - 8640
AUTOF,	00457.fas =	8641 - 8750
AUTOF,	00462.fas =	8751 - 9047
AUTOF,	00466.fas =	9048 - 9268
AUTOF,	00473.fas =	9269 - 9554
AUTOF,	00474.fas =	9555 - 9681
AUTOF,	00476.fas =	9682 - 9891
AUTOF,	00477.fas =	9892 - 10151
AUTOF,	00478.fas =	10152 - 10658
AUTOF,	00480.fas =	10659 - 11001
AUTOF,	00482.fas =	11002 - 11342
AUTOF,	00485.fas =	11343 - 11899
AUTOF,	00486.fas =	11900 - 12063
AUTOF,	00491.fas =	12064 - 12161
AUTOF,	00504.fas =	12162 - 12245
AUTOF,	00505.fas =	12246 - 12344
AUTOF,	00509.fas =	12345 - 12708
AUTOF,	00510.fas =	12709 - 12888
AUTOF,	00513.fas =	12889 - 13964
AUTOF,	00514.fas =	13965 - 14123
AUTOF,	00518.fas =	14124 - 14237
AUTOF,	00519.fas =	14238 - 14601
AUTOF,	00520.fas =	14602 - 14691
AUTOF,	00522.fas =	14692 - 14807
AUTOF,	00524.fas =	14808 - 14911
AUTOF,	00529.fas =	14912 - 15265
AUTOF,	00534.fas =	15266 - 15631
AUTOF,	00535.fas =	15632 - 15846
AUTOF,	00537.fas =	15847 - 15961
AUTOF,	00539.fas =	15962 - 16292
AUTOF,	00540.fas =	16293 - 16387
AUTOF,	00542.fas =	16388 - 16515
AUTOF,	00544.fas =	16516 - 16723
AUTOF,	00545.fas =	16724 - 16817
AUTOF,	00549.fas =	16818 - 17224
AUTOF,	00550.fas =	17225 - 17423
AUTOF,	00553.fas =	17424 - 17576
AUTOF,	00561.fas =	17577 - 18141
AUTOF,	00562.fas =	18142 - 18373
AUTOF,	00565.fas =	18374 - 18601
AUTOF,	00567.fas =	18602 - 18791
AUTOF,	00568.fas =	18792 - 19227
AUTOF,	00569.fas =	19228 - 19444
AUTOF,	00570.fas =	19445 - 20219
AUTOF,	00576.fas =	20220 - 20303
AUTOF,	00582.fas =	20304 - 20520
AUTOF,	00585.fas =	20521 - 20792
AUTOF,	00586.fas =	20793 - 21125
AUTOF,	00588.fas =	21126 - 21707
AUTOF,	00592.fas =	21708 - 21892
AUTOF,	00595.fas =	21893 - 22222
AUTOF,	00597.fas =	22223 - 22362
AUTOF,	00598.fas =	22363 - 22715
AUTOF,	00600.fas =	22716 - 22981
AUTOF,	00601.fas =	22982 - 23204
AUTOF,	00602.fas =	23205 - 23927
AUTOF,	00603.fas =	23928 - 24132
AUTOF,	00604.fas =	24133 - 24621
AUTOF,	00605.fas =	24622 - 24962
AUTOF,	00610.fas =	24963 - 25180
AUTOF,	00613.fas =	25181 - 25280
AUTOF,	00619.fas =	25281 - 25637
AUTOF,	00620.fas =	25638 - 25854
AUTOF,	00621.fas =	25855 - 26243
AUTOF,	00622.fas =	26244 - 26473
AUTOF,	00624.fas =	26474 - 26664
AUTOF,	00625.fas =	26665 - 27228
AUTOF,	00627.fas =	27229 - 27476
AUTOF,	00631.fas =	27477 - 27698
AUTOF,	00632.fas =	27699 - 27789
AUTOF,	00633.fas =	27790 - 27966
AUTOF,	00635.fas =	27967 - 28268
AUTOF,	00636.fas =	28269 - 28383
AUTOF,	00644.fas =	28384 - 28798
AUTOF,	00650.fas =	28799 - 29042
AUTOF,	00652.fas =	29043 - 29405
AUTOF,	00655.fas =	29406 - 29760
AUTOF,	00660.fas =	29761 - 29999
AUTOF,	00661.fas =	30000 - 30351
AUTOF,	00664.fas =	30352 - 31002
AUTOF,	00668.fas =	31003 - 31232
AUTOF,	00680.fas =	31233 - 31465
AUTOF,	00681.fas =	31466 - 31803
AUTOF,	00684.fas =	31804 - 31940
AUTOF,	00686.fas =	31941 - 32301
AUTOF,	00688.fas =	32302 - 32673
AUTOF,	00689.fas =	32674 - 32821
AUTOF,	00691.fas =	32822 - 33174
AUTOF,	00692.fas =	33175 - 33285
AUTOF,	00693.fas =	33286 - 33379
AUTOF,	00697.fas =	33380 - 33588
AUTOF,	00699.fas =	33589 - 34008
AUTOF,	00700.fas =	34009 - 34232
AUTOF,	00703.fas =	34233 - 34524
AUTOF,	00711.fas =	34525 - 34724
AUTOF,	00717.fas =	34725 - 34868
AUTOF,	00724.fas =	34869 - 35153
AUTOF,	00725.fas =	35154 - 35430
AUTOF,	00726.fas =	35431 - 35822
AUTOF,	00727.fas =	35823 - 36251
AUTOF,	00730.fas =	36252 - 36515
AUTOF,	00731.fas =	36516 - 36785
AUTOF,	00732.fas =	36786 - 36977
AUTOF,	00734.fas =	36978 - 37589
AUTOF,	00737.fas =	37590 - 37798
AUTOF,	00738.fas =	37799 - 38076
AUTOF,	00746.fas =	38077 - 38288
AUTOF,	00748.fas =	38289 - 38685
AUTOF,	00750.fas =	38686 - 38852
AUTOF,	00751.fas =	38853 - 38979
AUTOF,	00757.fas =	38980 - 39143
AUTOF,	00763.fas =	39144 - 39280
AUTOF,	00767.fas =	39281 - 39584
AUTOF,	00770.fas =	39585 - 39736
AUTOF,	00771.fas =	39737 - 39877
AUTOF,	00772.fas =	39878 - 40013
AUTOF,	00773.fas =	40014 - 40263
AUTOF,	00775.fas =	40264 - 40474
AUTOF,	00777.fas =	40475 - 40891
AUTOF,	00779.fas =	40892 - 41235
AUTOF,	00782.fas =	41236 - 41393
AUTOF,	00783.fas =	41394 - 41602
AUTOF,	00788.fas =	41603 - 41718
AUTOF,	00789.fas =	41719 - 41823
AUTOF,	00793.fas =	41824 - 42112
AUTOF,	00797.fas =	42113 - 42233
AUTOF,	00800.fas =	42234 - 42578
AUTOF,	00803.fas =	42579 - 42675
AUTOF,	00812.fas =	42676 - 42807
AUTOF,	00814.fas =	42808 - 43080
AUTOF,	00815.fas =	43081 - 43189
AUTOF,	00817.fas =	43190 - 43434
AUTOF,	00818.fas =	43435 - 43978
AUTOF,	00819.fas =	43979 - 44260
AUTOF,	00821.fas =	44261 - 44482
AUTOF,	00824.fas =	44483 - 44603
AUTOF,	00825.fas =	44604 - 44885
AUTOF,	00829.fas =	44886 - 45344
AUTOF,	00830.fas =	45345 - 45567
AUTOF,	00832.fas =	45568 - 45731
AUTOF,	00835.fas =	45732 - 45964
AUTOF,	00842.fas =	45965 - 46115
AUTOF,	00845.fas =	46116 - 46386
AUTOF,	00847.fas =	46387 - 46570
AUTOF,	00851.fas =	46571 - 46764
AUTOF,	00856.fas =	46765 - 46952
AUTOF,	00857.fas =	46953 - 47448
AUTOF,	00861.fas =	47449 - 47815
AUTOF,	00863.fas =	47816 - 47981
AUTOF,	00864.fas =	47982 - 48543
AUTOF,	00874.fas =	48544 - 48664
AUTOF,	00875.fas =	48665 - 48803
AUTOF,	00876.fas =	48804 - 49140
AUTOF,	00879.fas =	49141 - 49792
AUTOF,	00880.fas =	49793 - 50134
AUTOF,	00881.fas =	50135 - 50366
AUTOF,	00884.fas =	50367 - 50542
AUTOF,	00886.fas =	50543 - 50641
AUTOF,	00887.fas =	50642 - 50742
AUTOF,	00890.fas =	50743 - 50953
AUTOF,	00892.fas =	50954 - 51080
AUTOF,	00896.fas =	51081 - 51365
AUTOF,	00903.fas =	51366 - 51547
AUTOF,	00909.fas =	51548 - 51758
AUTOF,	00910.fas =	51759 - 52181
AUTOF,	00911.fas =	52182 - 52379
AUTOF,	00912.fas =	52380 - 53004
AUTOF,	00914.fas =	53005 - 53237
AUTOF,	00916.fas =	53238 - 53668
AUTOF,	00917.fas =	53669 - 53818
AUTOF,	00918.fas =	53819 - 54274
AUTOF,	00921.fas =	54275 - 54405
AUTOF,	00922.fas =	54406 - 54805
AUTOF,	00925.fas =	54806 - 55039
AUTOF,	00927.fas =	55040 - 55290
AUTOF,	00929.fas =	55291 - 55450
AUTOF,	00934.fas =	55451 - 55619
AUTOF,	00935.fas =	55620 - 55906
AUTOF,	00936.fas =	55907 - 56303
AUTOF,	00939.fas =	56304 - 56608
AUTOF,	00940.fas =	56609 - 56782
AUTOF,	00942.fas =	56783 - 56880
AUTOF,	00944.fas =	56881 - 56991
AUTOF,	00947.fas =	56992 - 57139
AUTOF,	00952.fas =	57140 - 57307
AUTOF,	00953.fas =	57308 - 57579
AUTOF,	00961.fas =	57580 - 57817
AUTOF,	00969.fas =	57818 - 58282
AUTOF,	00970.fas =	58283 - 58697
AUTOF,	00975.fas =	58698 - 58895
AUTOF,	00976.fas =	58896 - 59382
AUTOF,	00979.fas =	59383 - 59807
AUTOF,	00980.fas =	59808 - 59912
AUTOF,	00981.fas =	59913 - 60294
AUTOF,	00982.fas =	60295 - 60819
AUTOF,	00984.fas =	60820 - 61034
AUTOF,	00985.fas =	61035 - 61247
AUTOF,	00987.fas =	61248 - 61467
AUTOF,	00992.fas =	61468 - 61865
AUTOF,	00993.fas =	61866 - 62139
AUTOF,	00994.fas =	62140 - 62336
AUTOF,	00996.fas =	62337 - 62694
AUTOF,	00997.fas =	62695 - 63820
AUTOF,	00998.fas =	63821 - 64100
AUTOF,	01000.fas =	64101 - 64837
AUTOF,	01004.fas =	64838 - 65053
AUTOF,	01010.fas =	65054 - 65165
AUTOF,	01015.fas =	65166 - 65371
AUTOF,	01016.fas =	65372 - 65476
AUTOF,	01017.fas =	65477 - 65615
AUTOF,	01020.fas =	65616 - 65805
AUTOF,	01030.fas =	65806 - 66054
AUTOF,	01035.fas =	66055 - 66767
AUTOF,	01036.fas =	66768 - 66899
AUTOF,	01037.fas =	66900 - 67109
AUTOF,	01041.fas =	67110 - 67424
AUTOF,	01042.fas =	67425 - 67499
AUTOF,	01043.fas =	67500 - 67610
AUTOF,	01044.fas =	67611 - 67735
AUTOF,	01045.fas =	67736 - 68140
AUTOF,	01047.fas =	68141 - 68355
AUTOF,	01048.fas =	68356 - 68817
AUTOF,	01049.fas =	68818 - 69102
AUTOF,	01054.fas =	69103 - 69372
AUTOF,	01055.fas =	69373 - 69584
AUTOF,	01056.fas =	69585 - 69729
AUTOF,	01058.fas =	69730 - 69905
AUTOF,	01059.fas =	69906 - 70162
AUTOF,	01063.fas =	70163 - 70517
AUTOF,	01064.fas =	70518 - 70735
AUTOF,	01065.fas =	70736 - 71225
AUTOF,	01069.fas =	71226 - 71686
AUTOF,	01070.fas =	71687 - 71851
AUTOF,	01071.fas =	71852 - 72286
AUTOF,	01073.fas =	72287 - 72653
AUTOF,	01075.fas =	72654 - 73214
AUTOF,	01076.fas =	73215 - 73793
AUTOF,	01079.fas =	73794 - 74274
AUTOF,	01081.fas =	74275 - 74556
AUTOF,	01082.fas =	74557 - 75372
AUTOF,	01083.fas =	75373 - 75555
AUTOF,	01086.fas =	75556 - 75805
AUTOF,	01091.fas =	75806 - 75932
AUTOF,	01092.fas =	75933 - 76167
AUTOF,	01096.fas =	76168 - 76409
AUTOF,	01097.fas =	76410 - 76579
AUTOF,	01100.fas =	76580 - 76670
AUTOF,	01108.fas =	76671 - 76910
AUTOF,	01109.fas =	76911 - 77078
AUTOF,	01110.fas =	77079 - 77274
AUTOF,	01118.fas =	77275 - 77482
AUTOF,	01119.fas =	77483 - 77726
AUTOF,	01122.fas =	77727 - 77858
AUTOF,	01123.fas =	77859 - 78334
AUTOF,	01124.fas =	78335 - 78461
AUTOF,	01125.fas =	78462 - 78589
AUTOF,	01126.fas =	78590 - 78720
AUTOF,	01127.fas =	78721 - 78821
AUTOF,	01129.fas =	78822 - 78958
AUTOF,	01130.fas =	78959 - 79311
AUTOF,	01131.fas =	79312 - 79483
AUTOF,	01132.fas =	79484 - 79668
AUTOF,	01133.fas =	79669 - 79782
AUTOF,	01135.fas =	79783 - 79909
AUTOF,	01137.fas =	79910 - 79998
AUTOF,	01139.fas =	79999 - 80261
AUTOF,	01140.fas =	80262 - 80661
AUTOF,	01141.fas =	80662 - 80946
AUTOF,	01142.fas =	80947 - 81195
AUTOF,	01143.fas =	81196 - 81644
AUTOF,	01144.fas =	81645 - 81862
AUTOF,	01147.fas =	81863 - 82264
AUTOF,	01148.fas =	82265 - 82655
AUTOF,	01149.fas =	82656 - 83095
AUTOF,	01150.fas =	83096 - 83451
AUTOF,	01152.fas =	83452 - 83596
AUTOF,	01154.fas =	83597 - 84065
AUTOF,	01155.fas =	84066 - 84422
AUTOF,	01158.fas =	84423 - 84760
AUTOF,	01159.fas =	84761 - 84854
AUTOF,	01160.fas =	84855 - 84990
AUTOF,	01163.fas =	84991 - 85122
AUTOF,	01164.fas =	85123 - 85300
AUTOF,	01165.fas =	85301 - 85527
AUTOF,	01166.fas =	85528 - 85777
AUTOF,	01168.fas =	85778 - 85899
AUTOF,	01171.fas =	85900 - 86122
AUTOF,	01172.fas =	86123 - 86348
AUTOF,	01179.fas =	86349 - 86518
AUTOF,	01181.fas =	86519 - 86715
AUTOF,	01182.fas =	86716 - 86820
AUTOF,	01184.fas =	86821 - 87006
AUTOF,	01196.fas =	87007 - 87163
AUTOF,	01197.fas =	87164 - 87635
AUTOF,	01198.fas =	87636 - 87830
AUTOF,	01199.fas =	87831 - 88338
AUTOF,	01201.fas =	88339 - 88567
AUTOF,	01202.fas =	88568 - 88857
AUTOF,	01203.fas =	88858 - 89083
AUTOF,	01204.fas =	89084 - 89581
AUTOF,	01205.fas =	89582 - 89801
AUTOF,	01210.fas =	89802 - 90100
AUTOF,	01211.fas =	90101 - 90347
AUTOF,	01213.fas =	90348 - 90552
AUTOF,	01218.fas =	90553 - 91017
AUTOF,	01219.fas =	91018 - 91133
AUTOF,	01221.fas =	91134 - 91430
AUTOF,	01222.fas =	91431 - 91519
AUTOF,	01223.fas =	91520 - 91948
AUTOF,	01225.fas =	91949 - 92177
AUTOF,	01227.fas =	92178 - 92374
AUTOF,	01230.fas =	92375 - 92610
AUTOF,	01231.fas =	92611 - 92743
AUTOF,	01233.fas =	92744 - 92909
AUTOF,	01240.fas =	92910 - 92999
AUTOF,	01241.fas =	93000 - 93195
AUTOF,	01244.fas =	93196 - 93454
AUTOF,	01245.fas =	93455 - 93658
AUTOF,	01248.fas =	93659 - 93737
AUTOF,	01249.fas =	93738 - 93834
AUTOF,	01252.fas =	93835 - 94139
AUTOF,	01255.fas =	94140 - 94383
AUTOF,	01257.fas =	94384 - 94686
AUTOF,	01258.fas =	94687 - 94843
AUTOF,	01260.fas =	94844 - 94996
AUTOF,	01279.fas =	94997 - 95585
AUTOF,	01280.fas =	95586 - 95801
AUTOF,	01282.fas =	95802 - 96106
AUTOF,	01284.fas =	96107 - 96303
AUTOF,	01285.fas =	96304 - 96820
AUTOF,	01286.fas =	96821 - 97233
AUTOF,	01287.fas =	97234 - 97396
AUTOF,	01292.fas =	97397 - 97550
AUTOF,	01293.fas =	97551 - 97854
AUTOF,	01294.fas =	97855 - 98633
AUTOF,	01295.fas =	98634 - 98835
AUTOF,	01299.fas =	98836 - 98988
AUTOF,	01302.fas =	98989 - 99076
AUTOF,	01303.fas =	99077 - 99243
AUTOF,	01304.fas =	99244 - 99618
AUTOF,	01305.fas =	99619 - 99862
AUTOF,	01310.fas =	99863 - 100227
AUTOF,	01312.fas =	100228 - 100699
AUTOF,	01314.fas =	100700 - 100800
AUTOF,	01317.fas =	100801 - 101058
AUTOF,	01318.fas =	101059 - 101210
AUTOF,	01320.fas =	101211 - 101541
AUTOF,	01323.fas =	101542 - 101811
AUTOF,	01326.fas =	101812 - 102285
AUTOF,	01327.fas =	102286 - 102534
AUTOF,	01329.fas =	102535 - 102851
AUTOF,	01331.fas =	102852 - 103262
AUTOF,	01339.fas =	103263 - 103563
AUTOF,	01344.fas =	103564 - 103747
AUTOF,	01347.fas =	103748 - 104019
AUTOF,	01354.fas =	104020 - 104280
AUTOF,	01357.fas =	104281 - 104374
AUTOF,	01359.fas =	104375 - 104559
AUTOF,	01360.fas =	104560 - 104722
AUTOF,	01362.fas =	104723 - 104890
AUTOF,	01364.fas =	104891 - 104977
AUTOF,	01365.fas =	104978 - 105271
AUTOF,	01367.fas =	105272 - 105478
AUTOF,	01371.fas =	105479 - 105658
AUTOF,	01374.fas =	105659 - 105912
AUTOF,	01376.fas =	105913 - 106132
AUTOF,	01378.fas =	106133 - 106236
AUTOF,	01379.fas =	106237 - 106341
AUTOF,	01393.fas =	106342 - 106565
AUTOF,	01396.fas =	106566 - 107137
AUTOF,	01397.fas =	107138 - 107461
AUTOF,	01398.fas =	107462 - 107580
AUTOF,	01403.fas =	107581 - 107749
AUTOF,	01406.fas =	107750 - 107899
AUTOF,	01407.fas =	107900 - 108067
AUTOF,	01408.fas =	108068 - 108297
AUTOF,	01412.fas =	108298 - 108832
AUTOF,	01413.fas =	108833 - 109002
AUTOF,	01415.fas =	109003 - 109219
AUTOF,	01416.fas =	109220 - 109452
AUTOF,	01417.fas =	109453 - 109734
AUTOF,	01418.fas =	109735 - 109934
AUTOF,	01419.fas =	109935 - 110264
AUTOF,	01420.fas =	110265 - 110650
AUTOF,	01421.fas =	110651 - 110986
AUTOF,	01422.fas =	110987 - 111485
AUTOF,	01424.fas =	111486 - 111913
AUTOF,	01425.fas =	111914 - 112051
AUTOF,	01426.fas =	112052 - 112603
AUTOF,	01427.fas =	112604 - 112898
AUTOF,	01428.fas =	112899 - 113264
AUTOF,	01431.fas =	113265 - 113425
AUTOF,	01437.fas =	113426 - 113620
AUTOF,	01438.fas =	113621 - 114002
AUTOF,	01440.fas =	114003 - 114191
AUTOF,	01441.fas =	114192 - 114451
AUTOF,	01442.fas =	114452 - 114825
AUTOF,	01443.fas =	114826 - 115035
AUTOF,	01445.fas =	115036 - 115237
AUTOF,	01451.fas =	115238 - 115584
AUTOF,	01456.fas =	115585 - 115761
AUTOF,	01458.fas =	115762 - 116042
AUTOF,	01465.fas =	116043 - 116164
AUTOF,	01474.fas =	116165 - 116303
AUTOF,	01476.fas =	116304 - 116564
AUTOF,	01477.fas =	116565 - 116706
AUTOF,	01481.fas =	116707 - 116835
AUTOF,	01487.fas =	116836 - 117087
AUTOF,	01493.fas =	117088 - 117206
AUTOF,	01495.fas =	117207 - 117663
AUTOF,	01496.fas =	117664 - 117800
AUTOF,	01500.fas =	117801 - 118091
AUTOF,	01501.fas =	118092 - 118325
AUTOF,	01502.fas =	118326 - 118566
AUTOF,	01504.fas =	118567 - 119019
AUTOF,	01505.fas =	119020 - 119235
AUTOF,	01506.fas =	119236 - 119400
AUTOF,	01508.fas =	119401 - 119886
AUTOF,	01509.fas =	119887 - 120210
AUTOF,	01513.fas =	120211 - 120566
AUTOF,	01515.fas =	120567 - 120874
AUTOF,	01516.fas =	120875 - 121029
AUTOF,	01518.fas =	121030 - 121172
AUTOF,	01519.fas =	121173 - 121354
AUTOF,	01520.fas =	121355 - 121550
AUTOF,	01522.fas =	121551 - 121713
AUTOF,	01523.fas =	121714 - 121797
AUTOF,	01527.fas =	121798 - 122179
AUTOF,	01528.fas =	122180 - 122287
AUTOF,	01529.fas =	122288 - 122588
AUTOF,	01532.fas =	122589 - 122829
AUTOF,	01533.fas =	122830 - 123018
AUTOF,	01534.fas =	123019 - 123231
AUTOF,	01536.fas =	123232 - 123333
AUTOF,	01537.fas =	123334 - 123453
AUTOF,	01539.fas =	123454 - 123666
AUTOF,	01542.fas =	123667 - 123990
AUTOF,	01545.fas =	123991 - 124340
AUTOF,	01547.fas =	124341 - 124631
AUTOF,	01548.fas =	124632 - 124879
AUTOF,	01552.fas =	124880 - 125274
AUTOF,	01554.fas =	125275 - 125518
AUTOF,	01555.fas =	125519 - 125764
AUTOF,	01556.fas =	125765 - 126166
AUTOF,	01557.fas =	126167 - 126284
AUTOF,	01558.fas =	126285 - 126935
AUTOF,	01559.fas =	126936 - 127215
AUTOF,	01560.fas =	127216 - 127785
AUTOF,	01561.fas =	127786 - 128196
AUTOF,	01563.fas =	128197 - 128295
AUTOF,	01564.fas =	128296 - 128487
AUTOF,	01565.fas =	128488 - 128738
AUTOF,	01567.fas =	128739 - 128996
AUTOF,	01568.fas =	128997 - 129309
AUTOF,	01572.fas =	129310 - 129477
AUTOF,	01573.fas =	129478 - 129906
AUTOF,	01574.fas =	129907 - 130046
AUTOF,	01576.fas =	130047 - 130195
AUTOF,	01577.fas =	130196 - 130625
AUTOF,	01578.fas =	130626 - 130734
AUTOF,	01579.fas =	130735 - 131150
AUTOF,	01580.fas =	131151 - 131488
AUTOF,	01581.fas =	131489 - 131856
AUTOF,	01582.fas =	131857 - 132146
AUTOF,	01583.fas =	132147 - 132673
AUTOF,	01585.fas =	132674 - 132857
AUTOF,	01587.fas =	132858 - 133118
AUTOF,	01588.fas =	133119 - 133277
AUTOF,	01589.fas =	133278 - 133363
AUTOF,	01590.fas =	133364 - 133594
AUTOF,	01591.fas =	133595 - 133878
AUTOF,	01596.fas =	133879 - 134134
AUTOF,	01601.fas =	134135 - 134353
AUTOF,	01611.fas =	134354 - 134472
AUTOF,	01613.fas =	134473 - 134758
AUTOF,	01614.fas =	134759 - 134885
AUTOF,	01617.fas =	134886 - 134997
AUTOF,	01620.fas =	134998 - 135188
AUTOF,	01622.fas =	135189 - 135300
AUTOF,	01627.fas =	135301 - 135403
AUTOF,	01630.fas =	135404 - 135518
AUTOF,	01631.fas =	135519 - 135609
AUTOF,	01646.fas =	135610 - 135891
AUTOF,	01649.fas =	135892 - 136099
AUTOF,	01650.fas =	136100 - 136177
AUTOF,	01653.fas =	136178 - 136786
AUTOF,	01656.fas =	136787 - 136956
AUTOF,	01658.fas =	136957 - 137068
AUTOF,	01659.fas =	137069 - 137327
AUTOF,	01660.fas =	137328 - 137555
AUTOF,	01661.fas =	137556 - 137995
AUTOF,	01662.fas =	137996 - 138267
AUTOF,	01663.fas =	138268 - 138434
AUTOF,	01668.fas =	138435 - 138832
AUTOF,	01671.fas =	138833 - 139131
AUTOF,	01673.fas =	139132 - 139375
AUTOF,	01675.fas =	139376 - 139909
AUTOF,	01676.fas =	139910 - 140260
AUTOF,	01678.fas =	140261 - 140421
AUTOF,	01682.fas =	140422 - 140675
AUTOF,	01683.fas =	140676 - 140794
AUTOF,	01684.fas =	140795 - 141107
AUTOF,	01686.fas =	141108 - 141412
AUTOF,	01687.fas =	141413 - 141747
AUTOF,	01688.fas =	141748 - 141962
AUTOF,	01690.fas =	141963 - 142221
AUTOF,	01694.fas =	142222 - 142377
AUTOF,	01696.fas =	142378 - 142539
AUTOF,	01698.fas =	142540 - 142765
AUTOF,	01699.fas =	142766 - 143065
AUTOF,	01701.fas =	143066 - 143185
AUTOF,	01702.fas =	143186 - 143638
AUTOF,	01704.fas =	143639 - 144069
AUTOF,	01705.fas =	144070 - 144363
AUTOF,	01707.fas =	144364 - 144670
AUTOF,	01709.fas =	144671 - 144974
AUTOF,	01710.fas =	144975 - 145409
AUTOF,	01711.fas =	145410 - 145749
AUTOF,	01712.fas =	145750 - 146073
AUTOF,	01713.fas =	146074 - 146244
AUTOF,	01715.fas =	146245 - 146547
AUTOF,	01718.fas =	146548 - 146846
AUTOF,	01719.fas =	146847 - 147281
AUTOF,	01720.fas =	147282 - 147401
AUTOF,	01722.fas =	147402 - 147939
AUTOF,	01723.fas =	147940 - 148232
AUTOF,	01724.fas =	148233 - 148587
AUTOF,	01725.fas =	148588 - 148681
AUTOF,	01726.fas =	148682 - 148970
AUTOF,	01727.fas =	148971 - 149102
AUTOF,	01729.fas =	149103 - 149403
AUTOF,	01730.fas =	149404 - 149564
AUTOF,	01731.fas =	149565 - 150099
AUTOF,	01732.fas =	150100 - 150199
AUTOF,	01733.fas =	150200 - 150342
AUTOF,	01734.fas =	150343 - 150716
AUTOF,	01737.fas =	150717 - 150890
AUTOF,	01740.fas =	150891 - 151338
AUTOF,	01741.fas =	151339 - 151604
AUTOF,	01743.fas =	151605 - 151819
AUTOF,	01744.fas =	151820 - 151895
AUTOF,	01747.fas =	151896 - 152079
AUTOF,	01750.fas =	152080 - 152195
AUTOF,	01752.fas =	152196 - 152465
AUTOF,	01756.fas =	152466 - 152662
AUTOF,	01762.fas =	152663 - 152784
AUTOF,	01767.fas =	152785 - 152959
AUTOF,	01769.fas =	152960 - 153147
AUTOF,	01771.fas =	153148 - 153255
AUTOF,	01775.fas =	153256 - 153434
AUTOF,	01778.fas =	153435 - 153657
AUTOF,	01781.fas =	153658 - 153860
AUTOF,	01783.fas =	153861 - 153989
AUTOF,	01784.fas =	153990 - 154122
AUTOF,	01789.fas =	154123 - 154274
AUTOF,	01790.fas =	154275 - 154476
AUTOF,	01800.fas =	154477 - 154628
AUTOF,	01806.fas =	154629 - 154752
AUTOF,	01808.fas =	154753 - 154880
AUTOF,	01812.fas =	154881 - 155005
AUTOF,	01814.fas =	155006 - 155255
AUTOF,	01822.fas =	155256 - 155420
AUTOF,	01824.fas =	155421 - 155710
AUTOF,	01825.fas =	155711 - 156086
AUTOF,	01828.fas =	156087 - 156276
AUTOF,	01829.fas =	156277 - 156532
AUTOF,	01830.fas =	156533 - 156801
AUTOF,	01831.fas =	156802 - 157005
AUTOF,	01834.fas =	157006 - 157385
AUTOF,	01835.fas =	157386 - 157711
AUTOF,	01836.fas =	157712 - 157959
AUTOF,	01838.fas =	157960 - 158206
AUTOF,	01841.fas =	158207 - 158386
AUTOF,	01842.fas =	158387 - 158721
AUTOF,	01843.fas =	158722 - 159148
AUTOF,	01844.fas =	159149 - 159563
AUTOF,	01845.fas =	159564 - 159816
AUTOF,	01846.fas =	159817 - 160294
AUTOF,	01848.fas =	160295 - 160456
AUTOF,	01849.fas =	160457 - 160545
AUTOF,	01850.fas =	160546 - 160655
AUTOF,	01851.fas =	160656 - 160857
AUTOF,	01855.fas =	160858 - 161189
AUTOF,	01857.fas =	161190 - 161401
AUTOF,	01858.fas =	161402 - 161681
AUTOF,	01859.fas =	161682 - 161867
AUTOF,	01860.fas =	161868 - 162121
AUTOF,	01861.fas =	162122 - 162470
AUTOF,	01862.fas =	162471 - 162674
AUTOF,	01864.fas =	162675 - 162994
AUTOF,	01866.fas =	162995 - 163357
AUTOF,	01868.fas =	163358 - 163486
AUTOF,	01870.fas =	163487 - 163777
AUTOF,	01873.fas =	163778 - 164110
AUTOF,	01874.fas =	164111 - 164410
AUTOF,	01876.fas =	164411 - 164667
AUTOF,	01879.fas =	164668 - 165063
AUTOF,	01880.fas =	165064 - 165279
AUTOF,	01882.fas =	165280 - 165388
AUTOF,	01883.fas =	165389 - 165729
AUTOF,	01885.fas =	165730 - 166164
AUTOF,	01886.fas =	166165 - 166311
AUTOF,	01887.fas =	166312 - 166537
AUTOF,	01888.fas =	166538 - 166675
AUTOF,	01890.fas =	166676 - 167025
AUTOF,	01891.fas =	167026 - 167320
AUTOF,	01892.fas =	167321 - 167712
AUTOF,	01893.fas =	167713 - 167841
AUTOF,	01894.fas =	167842 - 168242
AUTOF,	01895.fas =	168243 - 168534
AUTOF,	01897.fas =	168535 - 169148
AUTOF,	01901.fas =	169149 - 169344
AUTOF,	01902.fas =	169345 - 169493
AUTOF,	01906.fas =	169494 - 169671
AUTOF,	01907.fas =	169672 - 169809
AUTOF,	01908.fas =	169810 - 169948
AUTOF,	01911.fas =	169949 - 170088
AUTOF,	01912.fas =	170089 - 170333
AUTOF,	01913.fas =	170334 - 170582
AUTOF,	01915.fas =	170583 - 170667
AUTOF,	01916.fas =	170668 - 170832
AUTOF,	01918.fas =	170833 - 170921
AUTOF,	01919.fas =	170922 - 171101
AUTOF,	01921.fas =	171102 - 171263
AUTOF,	01922.fas =	171264 - 171494
AUTOF,	01924.fas =	171495 - 171796
AUTOF,	01925.fas =	171797 - 172003
AUTOF,	01927.fas =	172004 - 172112
AUTOF,	01931.fas =	172113 - 172303
AUTOF,	01932.fas =	172304 - 172597
AUTOF,	01934.fas =	172598 - 172894
AUTOF,	01937.fas =	172895 - 173099
AUTOF,	01939.fas =	173100 - 173207
AUTOF,	01946.fas =	173208 - 173650
AUTOF,	01956.fas =	173651 - 173742
AUTOF,	01958.fas =	173743 - 173893
AUTOF,	01961.fas =	173894 - 174209
AUTOF,	01962.fas =	174210 - 174471
AUTOF,	01964.fas =	174472 - 174797
AUTOF,	01967.fas =	174798 - 174881
AUTOF,	01980.fas =	174882 - 175374
AUTOF,	01981.fas =	175375 - 175828
AUTOF,	01982.fas =	175829 - 176008
AUTOF,	01984.fas =	176009 - 176176
AUTOF,	01986.fas =	176177 - 176419
AUTOF,	01991.fas =	176420 - 176524
AUTOF,	01992.fas =	176525 - 176637
AUTOF,	01993.fas =	176638 - 176907
AUTOF,	01994.fas =	176908 - 177315
AUTOF,	01995.fas =	177316 - 177464
AUTOF,	01999.fas =	177465 - 177804
AUTOF,	02000.fas =	177805 - 178021
AUTOF,	02004.fas =	178022 - 178148
AUTOF,	02005.fas =	178149 - 178436
AUTOF,	02008.fas =	178437 - 178728
AUTOF,	02009.fas =	178729 - 178854
AUTOF,	02010.fas =	178855 - 179068
AUTOF,	02018.fas =	179069 - 179332
AUTOF,	02020.fas =	179333 - 179518
AUTOF,	02022.fas =	179519 - 179755
AUTOF,	02023.fas =	179756 - 180110
AUTOF,	02024.fas =	180111 - 180288
AUTOF,	02025.fas =	180289 - 180827
AUTOF,	02028.fas =	180828 - 181108
AUTOF,	02030.fas =	181109 - 181281
AUTOF,	02031.fas =	181282 - 181476
AUTOF,	02032.fas =	181477 - 181961
AUTOF,	02033.fas =	181962 - 182170
AUTOF,	02034.fas =	182171 - 182447
AUTOF,	02036.fas =	182448 - 182583
AUTOF,	02037.fas =	182584 - 182726
AUTOF,	02038.fas =	182727 - 182963
AUTOF,	02040.fas =	182964 - 183218
AUTOF,	02041.fas =	183219 - 183617
AUTOF,	02042.fas =	183618 - 183851
AUTOF,	02043.fas =	183852 - 184077
AUTOF,	02045.fas =	184078 - 184213
AUTOF,	02046.fas =	184214 - 184621
AUTOF,	02047.fas =	184622 - 185045
AUTOF,	02048.fas =	185046 - 185588
AUTOF,	02049.fas =	185589 - 185990
AUTOF,	02050.fas =	185991 - 186278
AUTOF,	02053.fas =	186279 - 186485
AUTOF,	02054.fas =	186486 - 186876
AUTOF,	02056.fas =	186877 - 187323
AUTOF,	02057.fas =	187324 - 187604
AUTOF,	02059.fas =	187605 - 187804
AUTOF,	02060.fas =	187805 - 188286
AUTOF,	02062.fas =	188287 - 188552
AUTOF,	02069.fas =	188553 - 188778
AUTOF,	02075.fas =	188779 - 188961
AUTOF,	02078.fas =	188962 - 189111
AUTOF,	02081.fas =	189112 - 189480
AUTOF,	02082.fas =	189481 - 189796
AUTOF,	02086.fas =	189797 - 189920
AUTOF,	02089.fas =	189921 - 190083
AUTOF,	02090.fas =	190084 - 190405
AUTOF,	02092.fas =	190406 - 190637
AUTOF,	02096.fas =	190638 - 190824
AUTOF,	02097.fas =	190825 - 190964
AUTOF,	02100.fas =	190965 - 191356
AUTOF,	02101.fas =	191357 - 191637
AUTOF,	02102.fas =	191638 - 191740
AUTOF,	02103.fas =	191741 - 191924
AUTOF,	02104.fas =	191925 - 192202
AUTOF,	02108.fas =	192203 - 192346
AUTOF,	02109.fas =	192347 - 192502
AUTOF,	02110.fas =	192503 - 192686
AUTOF,	02113.fas =	192687 - 192887
AUTOF,	02119.fas =	192888 - 193115
AUTOF,	02120.fas =	193116 - 193277
AUTOF,	02122.fas =	193278 - 193700
AUTOF,	02123.fas =	193701 - 194072
AUTOF,	02125.fas =	194073 - 194247
AUTOF,	02126.fas =	194248 - 194453
AUTOF,	02127.fas =	194454 - 194679
AUTOF,	02129.fas =	194680 - 194938
AUTOF,	02130.fas =	194939 - 195087
AUTOF,	02132.fas =	195088 - 195279
AUTOF,	02134.fas =	195280 - 195451
AUTOF,	02139.fas =	195452 - 195627
AUTOF,	02142.fas =	195628 - 195725
AUTOF,	02146.fas =	195726 - 196012
AUTOF,	02153.fas =	196013 - 196232
AUTOF,	02154.fas =	196233 - 196449
AUTOF,	02157.fas =	196450 - 196530
AUTOF,	02164.fas =	196531 - 196788
AUTOF,	02178.fas =	196789 - 196969
AUTOF,	02183.fas =	196970 - 197144
AUTOF,	02184.fas =	197145 - 197450
AUTOF,	02187.fas =	197451 - 197688
AUTOF,	02188.fas =	197689 - 197964
AUTOF,	02189.fas =	197965 - 198337
AUTOF,	02193.fas =	198338 - 198636
AUTOF,	02194.fas =	198637 - 199080
AUTOF,	02195.fas =	199081 - 199271
AUTOF,	02196.fas =	199272 - 199467
AUTOF,	02197.fas =	199468 - 199669
AUTOF,	02198.fas =	199670 - 200054
AUTOF,	02201.fas =	200055 - 200425
AUTOF,	02202.fas =	200426 - 200700
AUTOF,	02204.fas =	200701 - 200984
AUTOF,	02207.fas =	200985 - 201103
AUTOF,	02210.fas =	201104 - 201439
AUTOF,	02213.fas =	201440 - 201683
AUTOF,	02214.fas =	201684 - 201814
AUTOF,	02215.fas =	201815 - 202115
AUTOF,	02216.fas =	202116 - 202436
AUTOF,	02217.fas =	202437 - 202632
AUTOF,	02219.fas =	202633 - 202903
AUTOF,	02222.fas =	202904 - 203004
AUTOF,	02223.fas =	203005 - 203412
AUTOF,	02225.fas =	203413 - 203494
AUTOF,	02227.fas =	203495 - 203704
AUTOF,	02228.fas =	203705 - 203813
AUTOF,	02229.fas =	203814 - 204007
AUTOF,	02230.fas =	204008 - 204160
AUTOF,	02233.fas =	204161 - 204413
AUTOF,	02235.fas =	204414 - 204652
AUTOF,	02236.fas =	204653 - 204817
AUTOF,	02239.fas =	204818 - 205106
AUTOF,	02241.fas =	205107 - 205299
AUTOF,	02243.fas =	205300 - 205479
AUTOF,	02244.fas =	205480 - 205735
AUTOF,	02246.fas =	205736 - 205952
AUTOF,	02247.fas =	205953 - 206173
AUTOF,	02248.fas =	206174 - 206362
AUTOF,	02253.fas =	206363 - 206744
AUTOF,	02254.fas =	206745 - 206959
AUTOF,	02255.fas =	206960 - 207233
AUTOF,	02256.fas =	207234 - 207637
AUTOF,	02258.fas =	207638 - 207715
AUTOF,	02259.fas =	207716 - 208131
AUTOF,	02262.fas =	208132 - 208723
AUTOF,	02263.fas =	208724 - 208968
AUTOF,	02266.fas =	208969 - 209475
AUTOF,	02267.fas =	209476 - 209555
AUTOF,	02268.fas =	209556 - 209690
AUTOF,	02269.fas =	209691 - 209853
AUTOF,	02270.fas =	209854 - 210328
AUTOF,	02271.fas =	210329 - 210511
AUTOF,	02275.fas =	210512 - 210959
AUTOF,	02276.fas =	210960 - 211418
AUTOF,	02277.fas =	211419 - 211692
AUTOF,	02279.fas =	211693 - 211812
AUTOF,	02283.fas =	211813 - 212213
AUTOF,	02285.fas =	212214 - 212410
AUTOF,	02286.fas =	212411 - 212671
AUTOF,	02287.fas =	212672 - 212835
AUTOF,	02289.fas =	212836 - 213015
AUTOF,	02290.fas =	213016 - 213149
AUTOF,	02291.fas =	213150 - 213274
AUTOF,	02292.fas =	213275 - 213386
AUTOF,	02293.fas =	213387 - 213535
AUTOF,	02294.fas =	213536 - 213849
AUTOF,	02297.fas =	213850 - 214045
AUTOF,	02298.fas =	214046 - 214188
AUTOF,	02299.fas =	214189 - 214329
AUTOF,	02303.fas =	214330 - 214418
AUTOF,	02304.fas =	214419 - 214568
AUTOF,	02308.fas =	214569 - 214887
AUTOF,	02309.fas =	214888 - 215024
AUTOF,	02310.fas =	215025 - 215420
AUTOF,	02312.fas =	215421 - 215726
AUTOF,	02317.fas =	215727 - 215881
AUTOF,	02318.fas =	215882 - 216160
AUTOF,	02319.fas =	216161 - 216320
AUTOF,	02325.fas =	216321 - 216453
AUTOF,	02331.fas =	216454 - 216601
AUTOF,	02332.fas =	216602 - 216807
AUTOF,	02334.fas =	216808 - 217029
AUTOF,	02337.fas =	217030 - 217255
AUTOF,	02341.fas =	217256 - 217456
AUTOF,	02343.fas =	217457 - 217587
AUTOF,	02347.fas =	217588 - 217845
AUTOF,	02360.fas =	217846 - 218228
AUTOF,	02364.fas =	218229 - 218412
AUTOF,	02366.fas =	218413 - 218592
AUTOF,	02367.fas =	218593 - 218724
AUTOF,	02370.fas =	218725 - 218868
AUTOF,	02374.fas =	218869 - 218960
AUTOF,	02376.fas =	218961 - 219040
AUTOF,	02378.fas =	219041 - 219223
AUTOF,	02389.fas =	219224 - 219467
AUTOF,	02402.fas =	219468 - 219648
AUTOF,	02403.fas =	219649 - 219861
AUTOF,	02410.fas =	219862 - 220018
AUTOF,	02418.fas =	220019 - 220151
AUTOF,	02421.fas =	220152 - 220292
AUTOF,	02427.fas =	220293 - 220458
AUTOF,	02441.fas =	220459 - 220559
AUTOF,	02442.fas =	220560 - 220807
AUTOF,	02444.fas =	220808 - 221243
AUTOF,	02446.fas =	221244 - 221609
AUTOF,	02447.fas =	221610 - 221828
AUTOF,	02448.fas =	221829 - 222387
AUTOF,	02449.fas =	222388 - 222595
AUTOF,	02450.fas =	222596 - 222958
AUTOF,	02451.fas =	222959 - 223208
AUTOF,	02454.fas =	223209 - 223367
AUTOF,	02455.fas =	223368 - 223506
AUTOF,	02456.fas =	223507 - 224064
AUTOF,	02458.fas =	224065 - 224513
AUTOF,	02460.fas =	224514 - 224753
AUTOF,	02462.fas =	224754 - 224866
AUTOF,	02463.fas =	224867 - 225088
AUTOF,	02465.fas =	225089 - 225373
AUTOF,	02466.fas =	225374 - 225534
AUTOF,	02469.fas =	225535 - 225663
AUTOF,	02470.fas =	225664 - 225915
AUTOF,	02471.fas =	225916 - 226341
AUTOF,	02472.fas =	226342 - 226754
AUTOF,	02474.fas =	226755 - 226944
AUTOF,	02475.fas =	226945 - 227083
AUTOF,	02476.fas =	227084 - 227391
AUTOF,	02479.fas =	227392 - 227486
AUTOF,	02482.fas =	227487 - 227845
AUTOF,	02483.fas =	227846 - 227963
AUTOF,	02484.fas =	227964 - 228184
AUTOF,	02485.fas =	228185 - 228374
AUTOF,	02487.fas =	228375 - 228522
AUTOF,	02488.fas =	228523 - 228835
AUTOF,	02489.fas =	228836 - 229158
AUTOF,	02490.fas =	229159 - 229577
AUTOF,	02491.fas =	229578 - 229864
AUTOF,	02492.fas =	229865 - 229985
AUTOF,	02493.fas =	229986 - 230211
AUTOF,	02494.fas =	230212 - 230414
AUTOF,	02495.fas =	230415 - 230549
AUTOF,	02501.fas =	230550 - 230889
AUTOF,	02503.fas =	230890 - 231086
AUTOF,	02504.fas =	231087 - 231202
AUTOF,	02505.fas =	231203 - 231440
AUTOF,	02507.fas =	231441 - 231803
AUTOF,	02508.fas =	231804 - 232102
AUTOF,	02509.fas =	232103 - 232295
AUTOF,	02512.fas =	232296 - 232662
AUTOF,	02513.fas =	232663 - 232803
AUTOF,	02515.fas =	232804 - 232982
AUTOF,	02516.fas =	232983 - 233342
AUTOF,	02518.fas =	233343 - 233809
AUTOF,	02519.fas =	233810 - 234189
AUTOF,	02522.fas =	234190 - 234634
AUTOF,	02524.fas =	234635 - 234805
AUTOF,	02526.fas =	234806 - 235175
AUTOF,	02528.fas =	235176 - 235386
AUTOF,	02529.fas =	235387 - 235611
AUTOF,	02530.fas =	235612 - 235903
AUTOF,	02532.fas =	235904 - 236192
AUTOF,	02533.fas =	236193 - 236757
AUTOF,	02535.fas =	236758 - 237097
AUTOF,	02537.fas =	237098 - 237250
AUTOF,	02538.fas =	237251 - 237350
AUTOF,	02539.fas =	237351 - 237527
AUTOF,	02540.fas =	237528 - 237749
AUTOF,	02541.fas =	237750 - 237975
AUTOF,	02545.fas =	237976 - 238507
AUTOF,	02549.fas =	238508 - 239041
AUTOF,	02550.fas =	239042 - 239255
AUTOF,	02556.fas =	239256 - 239466
AUTOF,	02557.fas =	239467 - 239625
AUTOF,	02558.fas =	239626 - 239716
AUTOF,	02560.fas =	239717 - 239874
AUTOF,	02561.fas =	239875 - 240056
AUTOF,	02562.fas =	240057 - 240224
AUTOF,	02565.fas =	240225 - 240535
AUTOF,	02568.fas =	240536 - 240616
AUTOF,	02569.fas =	240617 - 240814
AUTOF,	02571.fas =	240815 - 241060
AUTOF,	02573.fas =	241061 - 241255
AUTOF,	02575.fas =	241256 - 241499
AUTOF,	02576.fas =	241500 - 241679
AUTOF,	02578.fas =	241680 - 241843
AUTOF,	02580.fas =	241844 - 241958
AUTOF,	02581.fas =	241959 - 242202
AUTOF,	02582.fas =	242203 - 242483
AUTOF,	02583.fas =	242484 - 242694
AUTOF,	02585.fas =	242695 - 242817
AUTOF,	02586.fas =	242818 - 243012
AUTOF,	02590.fas =	243013 - 243223
AUTOF,	02593.fas =	243224 - 243374
AUTOF,	02594.fas =	243375 - 243573
AUTOF,	02597.fas =	243574 - 243757
AUTOF,	02598.fas =	243758 - 244022
AUTOF,	02599.fas =	244023 - 244185
AUTOF,	02601.fas =	244186 - 244473
AUTOF,	02602.fas =	244474 - 244666
AUTOF,	02605.fas =	244667 - 244793
AUTOF,	02618.fas =	244794 - 244925
AUTOF,	02619.fas =	244926 - 245131
AUTOF,	02620.fas =	245132 - 245324
AUTOF,	02627.fas =	245325 - 245535
AUTOF,	02628.fas =	245536 - 245863
AUTOF,	02629.fas =	245864 - 246090
AUTOF,	02632.fas =	246091 - 246171
AUTOF,	02633.fas =	246172 - 246335
AUTOF,	02634.fas =	246336 - 246828
AUTOF,	02635.fas =	246829 - 247152
AUTOF,	02637.fas =	247153 - 247476
AUTOF,	02638.fas =	247477 - 247646
AUTOF,	02649.fas =	247647 - 247952
AUTOF,	02652.fas =	247953 - 248100
AUTOF,	02653.fas =	248101 - 248192
AUTOF,	02654.fas =	248193 - 248339
AUTOF,	02660.fas =	248340 - 248529
AUTOF,	02661.fas =	248530 - 248645
AUTOF,	02662.fas =	248646 - 248823
AUTOF,	02665.fas =	248824 - 248974
AUTOF,	02666.fas =	248975 - 249279
AUTOF,	02668.fas =	249280 - 249387
AUTOF,	02675.fas =	249388 - 249510
AUTOF,	02678.fas =	249511 - 249643
AUTOF,	02694.fas =	249644 - 250002
AUTOF,	02697.fas =	250003 - 250272
AUTOF,	02698.fas =	250273 - 250410
AUTOF,	02701.fas =	250411 - 250765
AUTOF,	02702.fas =	250766 - 251065
AUTOF,	02705.fas =	251066 - 251247
AUTOF,	02706.fas =	251248 - 251404
AUTOF,	02707.fas =	251405 - 251684
AUTOF,	02708.fas =	251685 - 251883
AUTOF,	02709.fas =	251884 - 252103
AUTOF,	02710.fas =	252104 - 252248
AUTOF,	02711.fas =	252249 - 252686
AUTOF,	02712.fas =	252687 - 252870
AUTOF,	02713.fas =	252871 - 253181
AUTOF,	02715.fas =	253182 - 253267
AUTOF,	02717.fas =	253268 - 253403
AUTOF,	02718.fas =	253404 - 253878
AUTOF,	02720.fas =	253879 - 254098
AUTOF,	02721.fas =	254099 - 254698
AUTOF,	02722.fas =	254699 - 254917
AUTOF,	02723.fas =	254918 - 255136
AUTOF,	02724.fas =	255137 - 255508
AUTOF,	02725.fas =	255509 - 255757
AUTOF,	02726.fas =	255758 - 255923
AUTOF,	02729.fas =	255924 - 256108
AUTOF,	02730.fas =	256109 - 256217
AUTOF,	02731.fas =	256218 - 256484
AUTOF,	02735.fas =	256485 - 256780
AUTOF,	02737.fas =	256781 - 256925
AUTOF,	02738.fas =	256926 - 257357
AUTOF,	02739.fas =	257358 - 257546
AUTOF,	02740.fas =	257547 - 257687
AUTOF,	02741.fas =	257688 - 257926
AUTOF,	02743.fas =	257927 - 258150
AUTOF,	02744.fas =	258151 - 258605
AUTOF,	02748.fas =	258606 - 258818
AUTOF,	02751.fas =	258819 - 259037
AUTOF,	02752.fas =	259038 - 259187
AUTOF,	02753.fas =	259188 - 259335
AUTOF,	02755.fas =	259336 - 259521
AUTOF,	02756.fas =	259522 - 259661
AUTOF,	02757.fas =	259662 - 259789
AUTOF,	02758.fas =	259790 - 260172
AUTOF,	02759.fas =	260173 - 260368
AUTOF,	02761.fas =	260369 - 260527
AUTOF,	02762.fas =	260528 - 260637
AUTOF,	02764.fas =	260638 - 260761
AUTOF,	02766.fas =	260762 - 261050
AUTOF,	02768.fas =	261051 - 261129
AUTOF,	02769.fas =	261130 - 261415
AUTOF,	02770.fas =	261416 - 261553
AUTOF,	02771.fas =	261554 - 261817
AUTOF,	02774.fas =	261818 - 262102
AUTOF,	02775.fas =	262103 - 262444
AUTOF,	02776.fas =	262445 - 262818
AUTOF,	02777.fas =	262819 - 263169
AUTOF,	02779.fas =	263170 - 263495
AUTOF,	02780.fas =	263496 - 263613
AUTOF,	02781.fas =	263614 - 263820
AUTOF,	02783.fas =	263821 - 264216
AUTOF,	02784.fas =	264217 - 264514
AUTOF,	02785.fas =	264515 - 264676
AUTOF,	02786.fas =	264677 - 264877
AUTOF,	02788.fas =	264878 - 265097
AUTOF,	02792.fas =	265098 - 265640
AUTOF,	02793.fas =	265641 - 265865
AUTOF,	02794.fas =	265866 - 266055
AUTOF,	02795.fas =	266056 - 266232
AUTOF,	02796.fas =	266233 - 266527
AUTOF,	02797.fas =	266528 - 266795
AUTOF,	02798.fas =	266796 - 267123
AUTOF,	02800.fas =	267124 - 267302
AUTOF,	02801.fas =	267303 - 267463
AUTOF,	02802.fas =	267464 - 267934
AUTOF,	02803.fas =	267935 - 268204
AUTOF,	02804.fas =	268205 - 268580
AUTOF,	02806.fas =	268581 - 268758
AUTOF,	02808.fas =	268759 - 268917
AUTOF,	02810.fas =	268918 - 269280
AUTOF,	02811.fas =	269281 - 269650
AUTOF,	02812.fas =	269651 - 269800
AUTOF,	02813.fas =	269801 - 270063
AUTOF,	02814.fas =	270064 - 270414
AUTOF,	02816.fas =	270415 - 270786
AUTOF,	02817.fas =	270787 - 271166
AUTOF,	02818.fas =	271167 - 271549
AUTOF,	02819.fas =	271550 - 271957
AUTOF,	02820.fas =	271958 - 272051
AUTOF,	02821.fas =	272052 - 272280
AUTOF,	02822.fas =	272281 - 272477
AUTOF,	02823.fas =	272478 - 272927
AUTOF,	02824.fas =	272928 - 273460
AUTOF,	02825.fas =	273461 - 273928
AUTOF,	02828.fas =	273929 - 274126
AUTOF,	02829.fas =	274127 - 274350
AUTOF,	02830.fas =	274351 - 274612
AUTOF,	02831.fas =	274613 - 274976
AUTOF,	02833.fas =	274977 - 275395
AUTOF,	02837.fas =	275396 - 275496
AUTOF,	02838.fas =	275497 - 275716
AUTOF,	02840.fas =	275717 - 275918
AUTOF,	02841.fas =	275919 - 276273
AUTOF,	02847.fas =	276274 - 276423
AUTOF,	02848.fas =	276424 - 276574
AUTOF,	02850.fas =	276575 - 276863
AUTOF,	02851.fas =	276864 - 277004
AUTOF,	02855.fas =	277005 - 277244
AUTOF,	02857.fas =	277245 - 277478
AUTOF,	02858.fas =	277479 - 277565
AUTOF,	02859.fas =	277566 - 277720
AUTOF,	02861.fas =	277721 - 278037
AUTOF,	02862.fas =	278038 - 278184
AUTOF,	02863.fas =	278185 - 278293
AUTOF,	02864.fas =	278294 - 278813
AUTOF,	02865.fas =	278814 - 278964
AUTOF,	02866.fas =	278965 - 279146
AUTOF,	02868.fas =	279147 - 279399
AUTOF,	02869.fas =	279400 - 279895
AUTOF,	02870.fas =	279896 - 280039
AUTOF,	02871.fas =	280040 - 280290
AUTOF,	02880.fas =	280291 - 280586
AUTOF,	02882.fas =	280587 - 280986
AUTOF,	02885.fas =	280987 - 281123
AUTOF,	02891.fas =	281124 - 281349
AUTOF,	02897.fas =	281350 - 281525
AUTOF,	02899.fas =	281526 - 281691
AUTOF,	02903.fas =	281692 - 281779
AUTOF,	02906.fas =	281780 - 281894
AUTOF,	02908.fas =	281895 - 282084
AUTOF,	02910.fas =	282085 - 282228
AUTOF,	02916.fas =	282229 - 282480
AUTOF,	02919.fas =	282481 - 282745
AUTOF,	02920.fas =	282746 - 282883
AUTOF,	02922.fas =	282884 - 283071
AUTOF,	02923.fas =	283072 - 283256
AUTOF,	02925.fas =	283257 - 283434
AUTOF,	02926.fas =	283435 - 283663
AUTOF,	02927.fas =	283664 - 283900
AUTOF,	02928.fas =	283901 - 284260
AUTOF,	02930.fas =	284261 - 284474
AUTOF,	02934.fas =	284475 - 284665
AUTOF,	02936.fas =	284666 - 284757
AUTOF,	02937.fas =	284758 - 284852
AUTOF,	02938.fas =	284853 - 285063
AUTOF,	02939.fas =	285064 - 285215
AUTOF,	02940.fas =	285216 - 285399
AUTOF,	02941.fas =	285400 - 285705
AUTOF,	02943.fas =	285706 - 285886
AUTOF,	02944.fas =	285887 - 286065
AUTOF,	02945.fas =	286066 - 286313
AUTOF,	02946.fas =	286314 - 286453
AUTOF,	02948.fas =	286454 - 286578
AUTOF,	02949.fas =	286579 - 286794
AUTOF,	02951.fas =	286795 - 287082
AUTOF,	02957.fas =	287083 - 287218
AUTOF,	02959.fas =	287219 - 287345
AUTOF,	02963.fas =	287346 - 287490
AUTOF,	02972.fas =	287491 - 287687
AUTOF,	02973.fas =	287688 - 287900
AUTOF,	02974.fas =	287901 - 288031
AUTOF,	02975.fas =	288032 - 288334
AUTOF,	02977.fas =	288335 - 288541
AUTOF,	02978.fas =	288542 - 288664
AUTOF,	02981.fas =	288665 - 288793
AUTOF,	02986.fas =	288794 - 289015
AUTOF,	02988.fas =	289016 - 289254
AUTOF,	02989.fas =	289255 - 289348
AUTOF,	02994.fas =	289349 - 289486
AUTOF,	03028.fas =	289487 - 289900
AUTOF,	03035.fas =	289901 - 290050
AUTOF,	03038.fas =	290051 - 290168
AUTOF,	03041.fas =	290169 - 290437
AUTOF,	03044.fas =	290438 - 290616
AUTOF,	03045.fas =	290617 - 290818
AUTOF,	03047.fas =	290819 - 291114
AUTOF,	03049.fas =	291115 - 291334
AUTOF,	03052.fas =	291335 - 291762
AUTOF,	03053.fas =	291763 - 291843
AUTOF,	03058.fas =	291844 - 292359
AUTOF,	03059.fas =	292360 - 292605
AUTOF,	03060.fas =	292606 - 292990
AUTOF,	03061.fas =	292991 - 293398
AUTOF,	03062.fas =	293399 - 293569
AUTOF,	03063.fas =	293570 - 293752
AUTOF,	03064.fas =	293753 - 294048
AUTOF,	03066.fas =	294049 - 294238
AUTOF,	03067.fas =	294239 - 294449
AUTOF,	03068.fas =	294450 - 294623
AUTOF,	03069.fas =	294624 - 294801
AUTOF,	03071.fas =	294802 - 294934
AUTOF,	03073.fas =	294935 - 295056
AUTOF,	03075.fas =	295057 - 295168
AUTOF,	03076.fas =	295169 - 295294
AUTOF,	03077.fas =	295295 - 295611
AUTOF,	03078.fas =	295612 - 295843
AUTOF,	03079.fas =	295844 - 295994
AUTOF,	03080.fas =	295995 - 296153
AUTOF,	03083.fas =	296154 - 296507
AUTOF,	03084.fas =	296508 - 296680
AUTOF,	03085.fas =	296681 - 296836
AUTOF,	03087.fas =	296837 - 297000
AUTOF,	03090.fas =	297001 - 297136
AUTOF,	03093.fas =	297137 - 297277
AUTOF,	03094.fas =	297278 - 297380
AUTOF,	03095.fas =	297381 - 297559
AUTOF,	03096.fas =	297560 - 297718
AUTOF,	03097.fas =	297719 - 297994
AUTOF,	03098.fas =	297995 - 298148
AUTOF,	03100.fas =	298149 - 298341
AUTOF,	03102.fas =	298342 - 298606
AUTOF,	03103.fas =	298607 - 298699
AUTOF,	03104.fas =	298700 - 298904
AUTOF,	03106.fas =	298905 - 299160
AUTOF,	03107.fas =	299161 - 299332
AUTOF,	03110.fas =	299333 - 299512
AUTOF,	03111.fas =	299513 - 299763
AUTOF,	03112.fas =	299764 - 300044
AUTOF,	03114.fas =	300045 - 300281
AUTOF,	03115.fas =	300282 - 300464
AUTOF,	03117.fas =	300465 - 300651
AUTOF,	03118.fas =	300652 - 300867
AUTOF,	03120.fas =	300868 - 301039
AUTOF,	03121.fas =	301040 - 301144
AUTOF,	03122.fas =	301145 - 301401
AUTOF,	03123.fas =	301402 - 301632
AUTOF,	03125.fas =	301633 - 301942
AUTOF,	03126.fas =	301943 - 302207
AUTOF,	03127.fas =	302208 - 302434
AUTOF,	03128.fas =	302435 - 302877
AUTOF,	03129.fas =	302878 - 302997
AUTOF,	03130.fas =	302998 - 303256
AUTOF,	03133.fas =	303257 - 303518
AUTOF,	03135.fas =	303519 - 303869
AUTOF,	03137.fas =	303870 - 304175
AUTOF,	03140.fas =	304176 - 304395
AUTOF,	03141.fas =	304396 - 304815
AUTOF,	03146.fas =	304816 - 305233
AUTOF,	03147.fas =	305234 - 305497
AUTOF,	03148.fas =	305498 - 306131
AUTOF,	03149.fas =	306132 - 306371
AUTOF,	03150.fas =	306372 - 306752
AUTOF,	03151.fas =	306753 - 306950
AUTOF,	03152.fas =	306951 - 307278
AUTOF,	03155.fas =	307279 - 307482
AUTOF,	03157.fas =	307483 - 307660
AUTOF,	03158.fas =	307661 - 307827
AUTOF,	03159.fas =	307828 - 308009
AUTOF,	03160.fas =	308010 - 308161
AUTOF,	03161.fas =	308162 - 308247
AUTOF,	03163.fas =	308248 - 308426
AUTOF,	03164.fas =	308427 - 308743
AUTOF,	03166.fas =	308744 - 309024
AUTOF,	03167.fas =	309025 - 309356
AUTOF,	03168.fas =	309357 - 309444
AUTOF,	03171.fas =	309445 - 309582
AUTOF,	03172.fas =	309583 - 309787
AUTOF,	03173.fas =	309788 - 310025
AUTOF,	03174.fas =	310026 - 310397
AUTOF,	03177.fas =	310398 - 310627
AUTOF,	03178.fas =	310628 - 310886
AUTOF,	03181.fas =	310887 - 311101
AUTOF,	03182.fas =	311102 - 311442
AUTOF,	03183.fas =	311443 - 311695
AUTOF,	03184.fas =	311696 - 311886
AUTOF,	03187.fas =	311887 - 312009
AUTOF,	03188.fas =	312010 - 312312
AUTOF,	03190.fas =	312313 - 312606
AUTOF,	03191.fas =	312607 - 312723
AUTOF,	03192.fas =	312724 - 312927
AUTOF,	03196.fas =	312928 - 313031
AUTOF,	03197.fas =	313032 - 313254
AUTOF,	03198.fas =	313255 - 313389
AUTOF,	03201.fas =	313390 - 313498
AUTOF,	03204.fas =	313499 - 313593
AUTOF,	03205.fas =	313594 - 313843
AUTOF,	03207.fas =	313844 - 314055
AUTOF,	03208.fas =	314056 - 314281
AUTOF,	03211.fas =	314282 - 314598
AUTOF,	03213.fas =	314599 - 314863
AUTOF,	03214.fas =	314864 - 314963
AUTOF,	03215.fas =	314964 - 315280
AUTOF,	03216.fas =	315281 - 315612
AUTOF,	03220.fas =	315613 - 315878
AUTOF,	03222.fas =	315879 - 316030
AUTOF,	03223.fas =	316031 - 316243
AUTOF,	03225.fas =	316244 - 316438
AUTOF,	03226.fas =	316439 - 316611
AUTOF,	03233.fas =	316612 - 316752
AUTOF,	03234.fas =	316753 - 317029
AUTOF,	03235.fas =	317030 - 317207
AUTOF,	03237.fas =	317208 - 317519
AUTOF,	03240.fas =	317520 - 317693
AUTOF,	03244.fas =	317694 - 317901
AUTOF,	03245.fas =	317902 - 318172
AUTOF,	03246.fas =	318173 - 318289
AUTOF,	03247.fas =	318290 - 318580
AUTOF,	03249.fas =	318581 - 318779
AUTOF,	03251.fas =	318780 - 318929
AUTOF,	03254.fas =	318930 - 319084
AUTOF,	03259.fas =	319085 - 319165
AUTOF,	03260.fas =	319166 - 319408
AUTOF,	03262.fas =	319409 - 319717
AUTOF,	03263.fas =	319718 - 319861
AUTOF,	03264.fas =	319862 - 320039
AUTOF,	03266.fas =	320040 - 320123
AUTOF,	03267.fas =	320124 - 320368
AUTOF,	03269.fas =	320369 - 320750
AUTOF,	03270.fas =	320751 - 320951
AUTOF,	03271.fas =	320952 - 321117
AUTOF,	03272.fas =	321118 - 321268
AUTOF,	03273.fas =	321269 - 321346
AUTOF,	03274.fas =	321347 - 321570
AUTOF,	03275.fas =	321571 - 321673
AUTOF,	03276.fas =	321674 - 321818
AUTOF,	03280.fas =	321819 - 321900
AUTOF,	03281.fas =	321901 - 322113
AUTOF,	03282.fas =	322114 - 322282
AUTOF,	03285.fas =	322283 - 322407
AUTOF,	03286.fas =	322408 - 322615
AUTOF,	03289.fas =	322616 - 322908
AUTOF,	03290.fas =	322909 - 323072
AUTOF,	03291.fas =	323073 - 323331
AUTOF,	03292.fas =	323332 - 323436
AUTOF,	03294.fas =	323437 - 323709
AUTOF,	03297.fas =	323710 - 323880
AUTOF,	03303.fas =	323881 - 324043
AUTOF,	03304.fas =	324044 - 324244
AUTOF,	03315.fas =	324245 - 324517
AUTOF,	03316.fas =	324518 - 324723
AUTOF,	03320.fas =	324724 - 324831
AUTOF,	03330.fas =	324832 - 324944
AUTOF,	03331.fas =	324945 - 325030
AUTOF,	03344.fas =	325031 - 325231
AUTOF,	03359.fas =	325232 - 325335
AUTOF,	03361.fas =	325336 - 325565
AUTOF,	03367.fas =	325566 - 325891
AUTOF,	03370.fas =	325892 - 326183
AUTOF,	03371.fas =	326184 - 326380
AUTOF,	03372.fas =	326381 - 326503
AUTOF,	03374.fas =	326504 - 326923
AUTOF,	03375.fas =	326924 - 327055
AUTOF,	03377.fas =	327056 - 327410
AUTOF,	03378.fas =	327411 - 327598
AUTOF,	03381.fas =	327599 - 327814
AUTOF,	03382.fas =	327815 - 327906
AUTOF,	03383.fas =	327907 - 328269
AUTOF,	03385.fas =	328270 - 328485
AUTOF,	03386.fas =	328486 - 328628
AUTOF,	03388.fas =	328629 - 328755
AUTOF,	03390.fas =	328756 - 328998
AUTOF,	03391.fas =	328999 - 329171
AUTOF,	03392.fas =	329172 - 329324
AUTOF,	03393.fas =	329325 - 329582
AUTOF,	03395.fas =	329583 - 329792
AUTOF,	03396.fas =	329793 - 329899
AUTOF,	03397.fas =	329900 - 330184
AUTOF,	03398.fas =	330185 - 330365
AUTOF,	03399.fas =	330366 - 330501
AUTOF,	03401.fas =	330502 - 330710
AUTOF,	03402.fas =	330711 - 330876
AUTOF,	03404.fas =	330877 - 331066
AUTOF,	03405.fas =	331067 - 331433
AUTOF,	03407.fas =	331434 - 331587
AUTOF,	03409.fas =	331588 - 331750
AUTOF,	03411.fas =	331751 - 331919
AUTOF,	03412.fas =	331920 - 332196
AUTOF,	03413.fas =	332197 - 332404
AUTOF,	03414.fas =	332405 - 332533
AUTOF,	03417.fas =	332534 - 332832
AUTOF,	03418.fas =	332833 - 332948
AUTOF,	03419.fas =	332949 - 333309
AUTOF,	03421.fas =	333310 - 333500
AUTOF,	03422.fas =	333501 - 333661
AUTOF,	03423.fas =	333662 - 333791
AUTOF,	03424.fas =	333792 - 333912
AUTOF,	03425.fas =	333913 - 334179
AUTOF,	03427.fas =	334180 - 334568
AUTOF,	03429.fas =	334569 - 334820
AUTOF,	03430.fas =	334821 - 335015
AUTOF,	03431.fas =	335016 - 335244
AUTOF,	03433.fas =	335245 - 335414
AUTOF,	03435.fas =	335415 - 335682
AUTOF,	03436.fas =	335683 - 336009
AUTOF,	03437.fas =	336010 - 336166
AUTOF,	03439.fas =	336167 - 336345
AUTOF,	03440.fas =	336346 - 336666
AUTOF,	03443.fas =	336667 - 336880
AUTOF,	03444.fas =	336881 - 337002
AUTOF,	03445.fas =	337003 - 337216
AUTOF,	03446.fas =	337217 - 337366
AUTOF,	03447.fas =	337367 - 337541
AUTOF,	03448.fas =	337542 - 337718
AUTOF,	03449.fas =	337719 - 338017
AUTOF,	03451.fas =	338018 - 338185
AUTOF,	03452.fas =	338186 - 338283
AUTOF,	03455.fas =	338284 - 338475
AUTOF,	03456.fas =	338476 - 338692
AUTOF,	03457.fas =	338693 - 338946
AUTOF,	03458.fas =	338947 - 339118
AUTOF,	03459.fas =	339119 - 339373
AUTOF,	03460.fas =	339374 - 339557
AUTOF,	03461.fas =	339558 - 339715
AUTOF,	03462.fas =	339716 - 339916
AUTOF,	03463.fas =	339917 - 340198
AUTOF,	03464.fas =	340199 - 340547
AUTOF,	03465.fas =	340548 - 340882
AUTOF,	03467.fas =	340883 - 341119
AUTOF,	03468.fas =	341120 - 341552
AUTOF,	03469.fas =	341553 - 341783
AUTOF,	03470.fas =	341784 - 342033
AUTOF,	03473.fas =	342034 - 342146
AUTOF,	03474.fas =	342147 - 342295
AUTOF,	03475.fas =	342296 - 342509
AUTOF,	03476.fas =	342510 - 342711
AUTOF,	03477.fas =	342712 - 343295
AUTOF,	03478.fas =	343296 - 343656
AUTOF,	03479.fas =	343657 - 343869
AUTOF,	03480.fas =	343870 - 344160
AUTOF,	03481.fas =	344161 - 344613
AUTOF,	03483.fas =	344614 - 344949
AUTOF,	03485.fas =	344950 - 345257
AUTOF,	03487.fas =	345258 - 345666
AUTOF,	03488.fas =	345667 - 345939
AUTOF,	03490.fas =	345940 - 346075
AUTOF,	03491.fas =	346076 - 346244
AUTOF,	03492.fas =	346245 - 346598
AUTOF,	03493.fas =	346599 - 346757
AUTOF,	03494.fas =	346758 - 346924
AUTOF,	03495.fas =	346925 - 347172
AUTOF,	03496.fas =	347173 - 347369
AUTOF,	03498.fas =	347370 - 347787
AUTOF,	03500.fas =	347788 - 348050
AUTOF,	03502.fas =	348051 - 348167
AUTOF,	03504.fas =	348168 - 348568
AUTOF,	03505.fas =	348569 - 348827
AUTOF,	03507.fas =	348828 - 349014
AUTOF,	03508.fas =	349015 - 349203
AUTOF,	03510.fas =	349204 - 349518
AUTOF,	03512.fas =	349519 - 349958
AUTOF,	03513.fas =	349959 - 350145
AUTOF,	03514.fas =	350146 - 350479
AUTOF,	03516.fas =	350480 - 350992
AUTOF,	03517.fas =	350993 - 351474
AUTOF,	03518.fas =	351475 - 351709
AUTOF,	03519.fas =	351710 - 351808
AUTOF,	03521.fas =	351809 - 351899
AUTOF,	03523.fas =	351900 - 352105
AUTOF,	03524.fas =	352106 - 352233
AUTOF,	03527.fas =	352234 - 352333
AUTOF,	03530.fas =	352334 - 352466
AUTOF,	03531.fas =	352467 - 352766
AUTOF,	03533.fas =	352767 - 352939
AUTOF,	03535.fas =	352940 - 353110
AUTOF,	03540.fas =	353111 - 353393
AUTOF,	03541.fas =	353394 - 353631
AUTOF,	03543.fas =	353632 - 353862
AUTOF,	03544.fas =	353863 - 354059
AUTOF,	03545.fas =	354060 - 354306
AUTOF,	03546.fas =	354307 - 354468
AUTOF,	03548.fas =	354469 - 354637
AUTOF,	03553.fas =	354638 - 354748
AUTOF,	03555.fas =	354749 - 354950
AUTOF,	03556.fas =	354951 - 355133
AUTOF,	03560.fas =	355134 - 355490
AUTOF,	03561.fas =	355491 - 355794
AUTOF,	03564.fas =	355795 - 355962
AUTOF,	03565.fas =	355963 - 356056
AUTOF,	03567.fas =	356057 - 356186
AUTOF,	03572.fas =	356187 - 356384
AUTOF,	03573.fas =	356385 - 356554
AUTOF,	03577.fas =	356555 - 356673
AUTOF,	03578.fas =	356674 - 356873
AUTOF,	03579.fas =	356874 - 357033
AUTOF,	03580.fas =	357034 - 357335
AUTOF,	03583.fas =	357336 - 357561
AUTOF,	03584.fas =	357562 - 357697
AUTOF,	03587.fas =	357698 - 357879
AUTOF,	03589.fas =	357880 - 358056
AUTOF,	03590.fas =	358057 - 358135
AUTOF,	03591.fas =	358136 - 358232
AUTOF,	03593.fas =	358233 - 358443
AUTOF,	03594.fas =	358444 - 358681
AUTOF,	03597.fas =	358682 - 358908
AUTOF,	03598.fas =	358909 - 359087
AUTOF,	03600.fas =	359088 - 359241
AUTOF,	03601.fas =	359242 - 359334
AUTOF,	03603.fas =	359335 - 359612
AUTOF,	03604.fas =	359613 - 359774
AUTOF,	03606.fas =	359775 - 359932
AUTOF,	03608.fas =	359933 - 360215
AUTOF,	03610.fas =	360216 - 360396
AUTOF,	03611.fas =	360397 - 360508
AUTOF,	03612.fas =	360509 - 360734
AUTOF,	03613.fas =	360735 - 360814
AUTOF,	03615.fas =	360815 - 361001
AUTOF,	03625.fas =	361002 - 361132
AUTOF,	03628.fas =	361133 - 361307
AUTOF,	03630.fas =	361308 - 361527
AUTOF,	03632.fas =	361528 - 361649
AUTOF,	03633.fas =	361650 - 361861
AUTOF,	03637.fas =	361862 - 362056
AUTOF,	03640.fas =	362057 - 362135
AUTOF,	03642.fas =	362136 - 362355
AUTOF,	03643.fas =	362356 - 362588
AUTOF,	03644.fas =	362589 - 362750
AUTOF,	03645.fas =	362751 - 362949
AUTOF,	03646.fas =	362950 - 363082
AUTOF,	03647.fas =	363083 - 363324
AUTOF,	03648.fas =	363325 - 363452
AUTOF,	03649.fas =	363453 - 363575
AUTOF,	03650.fas =	363576 - 363891
AUTOF,	03653.fas =	363892 - 364154
AUTOF,	03656.fas =	364155 - 364263
AUTOF,	03658.fas =	364264 - 364447
AUTOF,	03659.fas =	364448 - 364805
AUTOF,	03662.fas =	364806 - 365091
AUTOF,	03666.fas =	365092 - 365273
AUTOF,	03667.fas =	365274 - 365410
AUTOF,	03672.fas =	365411 - 365625
AUTOF,	03673.fas =	365626 - 366069
AUTOF,	03677.fas =	366070 - 366275
AUTOF,	03678.fas =	366276 - 366447
AUTOF,	03679.fas =	366448 - 366592
AUTOF,	03681.fas =	366593 - 366794
AUTOF,	03691.fas =	366795 - 367034
AUTOF,	03698.fas =	367035 - 367206
AUTOF,	03700.fas =	367207 - 367431
AUTOF,	03701.fas =	367432 - 367568
AUTOF,	03703.fas =	367569 - 367676
AUTOF,	03706.fas =	367677 - 367777
AUTOF,	03709.fas =	367778 - 368397
AUTOF,	03710.fas =	368398 - 368472
AUTOF,	03712.fas =	368473 - 368703
AUTOF,	03713.fas =	368704 - 368886
AUTOF,	03715.fas =	368887 - 369112
AUTOF,	03716.fas =	369113 - 369278
AUTOF,	03717.fas =	369279 - 369401
AUTOF,	03718.fas =	369402 - 369538
AUTOF,	03719.fas =	369539 - 369735
AUTOF,	03722.fas =	369736 - 369989
AUTOF,	03723.fas =	369990 - 370077
AUTOF,	03724.fas =	370078 - 370285
AUTOF,	03725.fas =	370286 - 370496
AUTOF,	03726.fas =	370497 - 370773
AUTOF,	03727.fas =	370774 - 371105
AUTOF,	03729.fas =	371106 - 371307
AUTOF,	03730.fas =	371308 - 371510
AUTOF,	03733.fas =	371511 - 371716
AUTOF,	03735.fas =	371717 - 371906
AUTOF,	03737.fas =	371907 - 372076
AUTOF,	03740.fas =	372077 - 372250
AUTOF,	03744.fas =	372251 - 372537
AUTOF,	03746.fas =	372538 - 372739
AUTOF,	03747.fas =	372740 - 372941
AUTOF,	03753.fas =	372942 - 373175
AUTOF,	03755.fas =	373176 - 373346
AUTOF,	03756.fas =	373347 - 373458
AUTOF,	03757.fas =	373459 - 373650
AUTOF,	03760.fas =	373651 - 373747
AUTOF,	03776.fas =	373748 - 373875
AUTOF,	03785.fas =	373876 - 374014
AUTOF,	03795.fas =	374015 - 374200
AUTOF,	03801.fas =	374201 - 374332
AUTOF,	03803.fas =	374333 - 374478
AUTOF,	03805.fas =	374479 - 374591
AUTOF,	03807.fas =	374592 - 374792
AUTOF,	03808.fas =	374793 - 375144
AUTOF,	03809.fas =	375145 - 375314
AUTOF,	03810.fas =	375315 - 375474
AUTOF,	03811.fas =	375475 - 375607
AUTOF,	03812.fas =	375608 - 375757
AUTOF,	03813.fas =	375758 - 375988
AUTOF,	03814.fas =	375989 - 376120
AUTOF,	03818.fas =	376121 - 376349
AUTOF,	03819.fas =	376350 - 376446
AUTOF,	03820.fas =	376447 - 376611
AUTOF,	03821.fas =	376612 - 376688
AUTOF,	03825.fas =	376689 - 376927
AUTOF,	03826.fas =	376928 - 377180
AUTOF,	03828.fas =	377181 - 377308
AUTOF,	03829.fas =	377309 - 377625
AUTOF,	03830.fas =	377626 - 377790
AUTOF,	03831.fas =	377791 - 378159
AUTOF,	03832.fas =	378160 - 378377
AUTOF,	03833.fas =	378378 - 378515
AUTOF,	03834.fas =	378516 - 378672
AUTOF,	03835.fas =	378673 - 378799
AUTOF,	03837.fas =	378800 - 379003
AUTOF,	03838.fas =	379004 - 379185
AUTOF,	03839.fas =	379186 - 379573
AUTOF,	03840.fas =	379574 - 379760
AUTOF,	03841.fas =	379761 - 380058
AUTOF,	03842.fas =	380059 - 380207
AUTOF,	03845.fas =	380208 - 380368
AUTOF,	03846.fas =	380369 - 380551
AUTOF,	03847.fas =	380552 - 380744
AUTOF,	03849.fas =	380745 - 380983
AUTOF,	03851.fas =	380984 - 381182
AUTOF,	03852.fas =	381183 - 381561
AUTOF,	03854.fas =	381562 - 381678
AUTOF,	03856.fas =	381679 - 381853
AUTOF,	03857.fas =	381854 - 382057
AUTOF,	03858.fas =	382058 - 382242
AUTOF,	03859.fas =	382243 - 382339
AUTOF,	03863.fas =	382340 - 382553
AUTOF,	03865.fas =	382554 - 382820
AUTOF,	03867.fas =	382821 - 383010
AUTOF,	03869.fas =	383011 - 383203
AUTOF,	03870.fas =	383204 - 383299
AUTOF,	03871.fas =	383300 - 383466
AUTOF,	03873.fas =	383467 - 383586
AUTOF,	03874.fas =	383587 - 383791
AUTOF,	03875.fas =	383792 - 383929
AUTOF,	03876.fas =	383930 - 384143
AUTOF,	03878.fas =	384144 - 384373
AUTOF,	03879.fas =	384374 - 384556
AUTOF,	03880.fas =	384557 - 384683
AUTOF,	03881.fas =	384684 - 384944
AUTOF,	03882.fas =	384945 - 385086
AUTOF,	03883.fas =	385087 - 385293
AUTOF,	03886.fas =	385294 - 385510
AUTOF,	03887.fas =	385511 - 385720
AUTOF,	03888.fas =	385721 - 385896
AUTOF,	03889.fas =	385897 - 386059
AUTOF,	03890.fas =	386060 - 386351
AUTOF,	03891.fas =	386352 - 386544
AUTOF,	03892.fas =	386545 - 386694
AUTOF,	03893.fas =	386695 - 386954
AUTOF,	03894.fas =	386955 - 387126
AUTOF,	03895.fas =	387127 - 387326
AUTOF,	03896.fas =	387327 - 387426
AUTOF,	03897.fas =	387427 - 387661
AUTOF,	03898.fas =	387662 - 387923
AUTOF,	03901.fas =	387924 - 388072
AUTOF,	03902.fas =	388073 - 388226
AUTOF,	03903.fas =	388227 - 388417
AUTOF,	03904.fas =	388418 - 388802
AUTOF,	03905.fas =	388803 - 388915
AUTOF,	03906.fas =	388916 - 389094
AUTOF,	03907.fas =	389095 - 389214
AUTOF,	03908.fas =	389215 - 389414
AUTOF,	03909.fas =	389415 - 389512
AUTOF,	03910.fas =	389513 - 389677
AUTOF,	03911.fas =	389678 - 389785
AUTOF,	03912.fas =	389786 - 389948
AUTOF,	03913.fas =	389949 - 390292
AUTOF,	03914.fas =	390293 - 390459
AUTOF,	03917.fas =	390460 - 390649
AUTOF,	03918.fas =	390650 - 390753
AUTOF,	03919.fas =	390754 - 390924
AUTOF,	03920.fas =	390925 - 391232
AUTOF,	03922.fas =	391233 - 391456
AUTOF,	03923.fas =	391457 - 391637
AUTOF,	03924.fas =	391638 - 392189
AUTOF,	03925.fas =	392190 - 392411
AUTOF,	03926.fas =	392412 - 392684
AUTOF,	03928.fas =	392685 - 392808
AUTOF,	03929.fas =	392809 - 393016
AUTOF,	03930.fas =	393017 - 393243
AUTOF,	03931.fas =	393244 - 393384
AUTOF,	03932.fas =	393385 - 393775
AUTOF,	03933.fas =	393776 - 394089
AUTOF,	03935.fas =	394090 - 394299
AUTOF,	03936.fas =	394300 - 394736
AUTOF,	03939.fas =	394737 - 395115
AUTOF,	03940.fas =	395116 - 395396
AUTOF,	03941.fas =	395397 - 395696
AUTOF,	03942.fas =	395697 - 395878
AUTOF,	03946.fas =	395879 - 396291
AUTOF,	03947.fas =	396292 - 396496
AUTOF,	03949.fas =	396497 - 397023
AUTOF,	03950.fas =	397024 - 397249
AUTOF,	03951.fas =	397250 - 397411
AUTOF,	03952.fas =	397412 - 397709
AUTOF,	03954.fas =	397710 - 398051
AUTOF,	03955.fas =	398052 - 398323
AUTOF,	03957.fas =	398324 - 398528
AUTOF,	03958.fas =	398529 - 398970
AUTOF,	03959.fas =	398971 - 399196
AUTOF,	03963.fas =	399197 - 399660
AUTOF,	03964.fas =	399661 - 399900
AUTOF,	03965.fas =	399901 - 400199
AUTOF,	03966.fas =	400200 - 400401
AUTOF,	03967.fas =	400402 - 400797
AUTOF,	03968.fas =	400798 - 400968
AUTOF,	03969.fas =	400969 - 401225
AUTOF,	03970.fas =	401226 - 401616
AUTOF,	03971.fas =	401617 - 401830
AUTOF,	03977.fas =	401831 - 402139
AUTOF,	03981.fas =	402140 - 402516
AUTOF,	03987.fas =	402517 - 402654
AUTOF,	03988.fas =	402655 - 402844
AUTOF,	03989.fas =	402845 - 403357
AUTOF,	03992.fas =	403358 - 403493
AUTOF,	03994.fas =	403494 - 403596
AUTOF,	03995.fas =	403597 - 403762
AUTOF,	03998.fas =	403763 - 403874
AUTOF,	04000.fas =	403875 - 404204
AUTOF,	04001.fas =	404205 - 404367
AUTOF,	04003.fas =	404368 - 404588
AUTOF,	04004.fas =	404589 - 404731
AUTOF,	04005.fas =	404732 - 404948
AUTOF,	04006.fas =	404949 - 405060
AUTOF,	04008.fas =	405061 - 405255
AUTOF,	04010.fas =	405256 - 405340
AUTOF,	04012.fas =	405341 - 405452
AUTOF,	04013.fas =	405453 - 405576
AUTOF,	04015.fas =	405577 - 405774
AUTOF,	04017.fas =	405775 - 406097
AUTOF,	04018.fas =	406098 - 406269
AUTOF,	04019.fas =	406270 - 406603
AUTOF,	04020.fas =	406604 - 406846
AUTOF,	04021.fas =	406847 - 407057
AUTOF,	04022.fas =	407058 - 407269
AUTOF,	04023.fas =	407270 - 407345
AUTOF,	04024.fas =	407346 - 407597
AUTOF,	04026.fas =	407598 - 407706
AUTOF,	04027.fas =	407707 - 407841
AUTOF,	04028.fas =	407842 - 407934
AUTOF,	04029.fas =	407935 - 408133
AUTOF,	04030.fas =	408134 - 408250
AUTOF,	04031.fas =	408251 - 408523
AUTOF,	04032.fas =	408524 - 408762
AUTOF,	04033.fas =	408763 - 409141
AUTOF,	04036.fas =	409142 - 409297
AUTOF,	04039.fas =	409298 - 409418
AUTOF,	04040.fas =	409419 - 409510
AUTOF,	04041.fas =	409511 - 409716
AUTOF,	04042.fas =	409717 - 409888
AUTOF,	04044.fas =	409889 - 410073
AUTOF,	04046.fas =	410074 - 410249
AUTOF,	04048.fas =	410250 - 410718
AUTOF,	04049.fas =	410719 - 410847
AUTOF,	04050.fas =	410848 - 411021
AUTOF,	04052.fas =	411022 - 411133
AUTOF,	04053.fas =	411134 - 411301
AUTOF,	04054.fas =	411302 - 411395
AUTOF,	04057.fas =	411396 - 411608
AUTOF,	04058.fas =	411609 - 411734
AUTOF,	04059.fas =	411735 - 411940
AUTOF,	04060.fas =	411941 - 412131
AUTOF,	04061.fas =	412132 - 412376
AUTOF,	04063.fas =	412377 - 412689
AUTOF,	04065.fas =	412690 - 412964
AUTOF,	04067.fas =	412965 - 413110
AUTOF,	04068.fas =	413111 - 413256
AUTOF,	04069.fas =	413257 - 413466
AUTOF,	04071.fas =	413467 - 413700
AUTOF,	04072.fas =	413701 - 413861
AUTOF,	04073.fas =	413862 - 414079
AUTOF,	04074.fas =	414080 - 414235
AUTOF,	04075.fas =	414236 - 414415
AUTOF,	04076.fas =	414416 - 414572
AUTOF,	04082.fas =	414573 - 414787
AUTOF,	04083.fas =	414788 - 414939
AUTOF,	04084.fas =	414940 - 415250
AUTOF,	04085.fas =	415251 - 415344
AUTOF,	04087.fas =	415345 - 415597
AUTOF,	04091.fas =	415598 - 415760
AUTOF,	04095.fas =	415761 - 415867
AUTOF,	04096.fas =	415868 - 415984
AUTOF,	04097.fas =	415985 - 416122
AUTOF,	04101.fas =	416123 - 416314
AUTOF,	04103.fas =	416315 - 416464
AUTOF,	04104.fas =	416465 - 416615
AUTOF,	04105.fas =	416616 - 416762
AUTOF,	04106.fas =	416763 - 417012
AUTOF,	04107.fas =	417013 - 417132
AUTOF,	04108.fas =	417133 - 417207
AUTOF,	04114.fas =	417208 - 417308
AUTOF,	04115.fas =	417309 - 417462
AUTOF,	04121.fas =	417463 - 417583
AUTOF,	04123.fas =	417584 - 417696
AUTOF,	04126.fas =	417697 - 417853
AUTOF,	04132.fas =	417854 - 418064
AUTOF,	04138.fas =	418065 - 418235
AUTOF,	04139.fas =	418236 - 418424
AUTOF,	04143.fas =	418425 - 418630
AUTOF,	04145.fas =	418631 - 418788
AUTOF,	04146.fas =	418789 - 419056
AUTOF,	04147.fas =	419057 - 419186
AUTOF,	04148.fas =	419187 - 419276
AUTOF,	04149.fas =	419277 - 419407
AUTOF,	04150.fas =	419408 - 419619
AUTOF,	04151.fas =	419620 - 419714
AUTOF,	04152.fas =	419715 - 419831
AUTOF,	04153.fas =	419832 - 419973
AUTOF,	04155.fas =	419974 - 420087
AUTOF,	04156.fas =	420088 - 420265
AUTOF,	04157.fas =	420266 - 420474
AUTOF,	04158.fas =	420475 - 420597
AUTOF,	04159.fas =	420598 - 420828
AUTOF,	04161.fas =	420829 - 420934
AUTOF,	04164.fas =	420935 - 421209
AUTOF,	04167.fas =	421210 - 421402
AUTOF,	04169.fas =	421403 - 421669
AUTOF,	04172.fas =	421670 - 421850
AUTOF,	04174.fas =	421851 - 421998
AUTOF,	04175.fas =	421999 - 422088
AUTOF,	04176.fas =	422089 - 422235
AUTOF,	04177.fas =	422236 - 422427
AUTOF,	04178.fas =	422428 - 422556
AUTOF,	04181.fas =	422557 - 422662
AUTOF,	04183.fas =	422663 - 422794
AUTOF,	04184.fas =	422795 - 422939
AUTOF,	04185.fas =	422940 - 423272
AUTOF,	04187.fas =	423273 - 423487
AUTOF,	04188.fas =	423488 - 423695
AUTOF,	04189.fas =	423696 - 423800
AUTOF,	04191.fas =	423801 - 423968
AUTOF,	04192.fas =	423969 - 424085
AUTOF,	04193.fas =	424086 - 424195
AUTOF,	04196.fas =	424196 - 424290
AUTOF,	04197.fas =	424291 - 424584
AUTOF,	04198.fas =	424585 - 424789
AUTOF,	04201.fas =	424790 - 425098
AUTOF,	04202.fas =	425099 - 425285
AUTOF,	04204.fas =	425286 - 425493
AUTOF,	04209.fas =	425494 - 425655
AUTOF,	04212.fas =	425656 - 425792
AUTOF,	04216.fas =	425793 - 425965
AUTOF,	04217.fas =	425966 - 426187
AUTOF,	04218.fas =	426188 - 426308
AUTOF,	04220.fas =	426309 - 426479
AUTOF,	04221.fas =	426480 - 426694
AUTOF,	04227.fas =	426695 - 426910
AUTOF,	04229.fas =	426911 - 427017
AUTOF,	04231.fas =	427018 - 427243
AUTOF,	04232.fas =	427244 - 427578
AUTOF,	04233.fas =	427579 - 427726
AUTOF,	04236.fas =	427727 - 427869
AUTOF,	04237.fas =	427870 - 428267
AUTOF,	04238.fas =	428268 - 428452
AUTOF,	04246.fas =	428453 - 428532
AUTOF,	04248.fas =	428533 - 428693
AUTOF,	04249.fas =	428694 - 428832
AUTOF,	04257.fas =	428833 - 428994
AUTOF,	04258.fas =	428995 - 429195
AUTOF,	04259.fas =	429196 - 429359
AUTOF,	04260.fas =	429360 - 429606
AUTOF,	04261.fas =	429607 - 429682
AUTOF,	04263.fas =	429683 - 429989
AUTOF,	04273.fas =	429990 - 430201
AUTOF,	04279.fas =	430202 - 430414
AUTOF,	04285.fas =	430415 - 430527
AUTOF,	04295.fas =	430528 - 430779
AUTOF,	04299.fas =	430780 - 430887
AUTOF,	04314.fas =	430888 - 431123
AUTOF,	04315.fas =	431124 - 431215
AUTOF,	04316.fas =	431216 - 431442
AUTOF,	04320.fas =	431443 - 431767
AUTOF,	04321.fas =	431768 - 431989
AUTOF,	04322.fas =	431990 - 432154
AUTOF,	04323.fas =	432155 - 432482
AUTOF,	04324.fas =	432483 - 432636
AUTOF,	04325.fas =	432637 - 432765
AUTOF,	04328.fas =	432766 - 432883
AUTOF,	04329.fas =	432884 - 433147
AUTOF,	04331.fas =	433148 - 433324
AUTOF,	04334.fas =	433325 - 433477
AUTOF,	04335.fas =	433478 - 433673
AUTOF,	04339.fas =	433674 - 433761
AUTOF,	04342.fas =	433762 - 433954
AUTOF,	04343.fas =	433955 - 434076
AUTOF,	04346.fas =	434077 - 434195
AUTOF,	04348.fas =	434196 - 434379
AUTOF,	04349.fas =	434380 - 434535
AUTOF,	04352.fas =	434536 - 434732
AUTOF,	04354.fas =	434733 - 434876
AUTOF,	04355.fas =	434877 - 435084
AUTOF,	04356.fas =	435085 - 435275
AUTOF,	04357.fas =	435276 - 435453
AUTOF,	04361.fas =	435454 - 435588
AUTOF,	04362.fas =	435589 - 435926
AUTOF,	04363.fas =	435927 - 436078
AUTOF,	04364.fas =	436079 - 436209
AUTOF,	04365.fas =	436210 - 436349
AUTOF,	04366.fas =	436350 - 436558
AUTOF,	04368.fas =	436559 - 436763
AUTOF,	04370.fas =	436764 - 436967
AUTOF,	04371.fas =	436968 - 437197
AUTOF,	04374.fas =	437198 - 437531
AUTOF,	04375.fas =	437532 - 437674
AUTOF,	04376.fas =	437675 - 437814
AUTOF,	04377.fas =	437815 - 437964
AUTOF,	04378.fas =	437965 - 438137
AUTOF,	04379.fas =	438138 - 438347
AUTOF,	04380.fas =	438348 - 438468
AUTOF,	04382.fas =	438469 - 438673
AUTOF,	04387.fas =	438674 - 438873
AUTOF,	04388.fas =	438874 - 438990
AUTOF,	04389.fas =	438991 - 439133
AUTOF,	04390.fas =	439134 - 439426
AUTOF,	04391.fas =	439427 - 439712
AUTOF,	04392.fas =	439713 - 439872
AUTOF,	04393.fas =	439873 - 439947
AUTOF,	04395.fas =	439948 - 440074
AUTOF,	04396.fas =	440075 - 440253
AUTOF,	04397.fas =	440254 - 440392
AUTOF,	04398.fas =	440393 - 440554
AUTOF,	04399.fas =	440555 - 440728
AUTOF,	04404.fas =	440729 - 440935
AUTOF,	04405.fas =	440936 - 441115
AUTOF,	04408.fas =	441116 - 441242
AUTOF,	04409.fas =	441243 - 441378
AUTOF,	04410.fas =	441379 - 441626
AUTOF,	04411.fas =	441627 - 441801
AUTOF,	04412.fas =	441802 - 441979
AUTOF,	04414.fas =	441980 - 442143
AUTOF,	04415.fas =	442144 - 442334
AUTOF,	04416.fas =	442335 - 442612
AUTOF,	04417.fas =	442613 - 442733
AUTOF,	04418.fas =	442734 - 442875
AUTOF,	04421.fas =	442876 - 442978
AUTOF,	04423.fas =	442979 - 443099
AUTOF,	04424.fas =	443100 - 443276
AUTOF,	04426.fas =	443277 - 443516
AUTOF,	04427.fas =	443517 - 443730
AUTOF,	04429.fas =	443731 - 443950
AUTOF,	04432.fas =	443951 - 444125
AUTOF,	04433.fas =	444126 - 444359
AUTOF,	04434.fas =	444360 - 444518
AUTOF,	04435.fas =	444519 - 444759
AUTOF,	04437.fas =	444760 - 445054
AUTOF,	04438.fas =	445055 - 445286
AUTOF,	04439.fas =	445287 - 445536
AUTOF,	04440.fas =	445537 - 446041
AUTOF,	04441.fas =	446042 - 446232
AUTOF,	04443.fas =	446233 - 446355
AUTOF,	04444.fas =	446356 - 446636
AUTOF,	04445.fas =	446637 - 446800
AUTOF,	04446.fas =	446801 - 447134
AUTOF,	04449.fas =	447135 - 447389
AUTOF,	04450.fas =	447390 - 447545
AUTOF,	04451.fas =	447546 - 447913
AUTOF,	04452.fas =	447914 - 448259
AUTOF,	04454.fas =	448260 - 448517
AUTOF,	04456.fas =	448518 - 448849
AUTOF,	04458.fas =	448850 - 449161
AUTOF,	04459.fas =	449162 - 449267
AUTOF,	04463.fas =	449268 - 449388
AUTOF,	04464.fas =	449389 - 449575
AUTOF,	04465.fas =	449576 - 449688
AUTOF,	04466.fas =	449689 - 449889
AUTOF,	04467.fas =	449890 - 450087
AUTOF,	04470.fas =	450088 - 450254
AUTOF,	04471.fas =	450255 - 450462
AUTOF,	04472.fas =	450463 - 450588
AUTOF,	04473.fas =	450589 - 450770
AUTOF,	04474.fas =	450771 - 450997
AUTOF,	04479.fas =	450998 - 451202
AUTOF,	04480.fas =	451203 - 451417
AUTOF,	04481.fas =	451418 - 451665
AUTOF,	04483.fas =	451666 - 451918
AUTOF,	04484.fas =	451919 - 452287
AUTOF,	04485.fas =	452288 - 452494
AUTOF,	04487.fas =	452495 - 452746
AUTOF,	04488.fas =	452747 - 453064
AUTOF,	04489.fas =	453065 - 453259
AUTOF,	04490.fas =	453260 - 453432
AUTOF,	04491.fas =	453433 - 453638
AUTOF,	04492.fas =	453639 - 453934
AUTOF,	04493.fas =	453935 - 454249
AUTOF,	04496.fas =	454250 - 454479
AUTOF,	04497.fas =	454480 - 454712
AUTOF,	04500.fas =	454713 - 454832
AUTOF,	04501.fas =	454833 - 455046
AUTOF,	04503.fas =	455047 - 455263
AUTOF,	04504.fas =	455264 - 455514
AUTOF,	04505.fas =	455515 - 455622
AUTOF,	04510.fas =	455623 - 456049
AUTOF,	04514.fas =	456050 - 456253
AUTOF,	04515.fas =	456254 - 456453
AUTOF,	04517.fas =	456454 - 456568
AUTOF,	04519.fas =	456569 - 456752
AUTOF,	04521.fas =	456753 - 456987
AUTOF,	04522.fas =	456988 - 457140
AUTOF,	04524.fas =	457141 - 457284
AUTOF,	04525.fas =	457285 - 457500
AUTOF,	04526.fas =	457501 - 457616
AUTOF,	04528.fas =	457617 - 457776
AUTOF,	04529.fas =	457777 - 457879
AUTOF,	04530.fas =	457880 - 458019
AUTOF,	04532.fas =	458020 - 458180
AUTOF,	04533.fas =	458181 - 458371
AUTOF,	04534.fas =	458372 - 458504
AUTOF,	04535.fas =	458505 - 458803
AUTOF,	04537.fas =	458804 - 459084
AUTOF,	04538.fas =	459085 - 459244
AUTOF,	04539.fas =	459245 - 459439
AUTOF,	04540.fas =	459440 - 459842
AUTOF,	04541.fas =	459843 - 460063
AUTOF,	04542.fas =	460064 - 460175
AUTOF,	04544.fas =	460176 - 460321
AUTOF,	04546.fas =	460322 - 460492
AUTOF,	04547.fas =	460493 - 460612
AUTOF,	04548.fas =	460613 - 460749
AUTOF,	04549.fas =	460750 - 460947
AUTOF,	04550.fas =	460948 - 461140
AUTOF,	04551.fas =	461141 - 461225
AUTOF,	04553.fas =	461226 - 461465
AUTOF,	04554.fas =	461466 - 461593
AUTOF,	04555.fas =	461594 - 461702
AUTOF,	04559.fas =	461703 - 461915
AUTOF,	04561.fas =	461916 - 462145
AUTOF,	04562.fas =	462146 - 462387
AUTOF,	04563.fas =	462388 - 462537
AUTOF,	04564.fas =	462538 - 462614
AUTOF,	04565.fas =	462615 - 462874
AUTOF,	04566.fas =	462875 - 463059
AUTOF,	04568.fas =	463060 - 463238
AUTOF,	04571.fas =	463239 - 463350
AUTOF,	04576.fas =	463351 - 463579
AUTOF,	04577.fas =	463580 - 463692
AUTOF,	04579.fas =	463693 - 463836
AUTOF,	04580.fas =	463837 - 464017
AUTOF,	04582.fas =	464018 - 464177
[truncated: 1,398 more rows]
