# Supplementary material for: Spider phylogenomics: untangling the Spider Tree of Life
Source: PeerJ journal article supplement (doi:10.7717/peerj.1719), 2016-02-23
Supplement: SupplementalFigure3.pdf [file SupplementalFigure3.pdf]

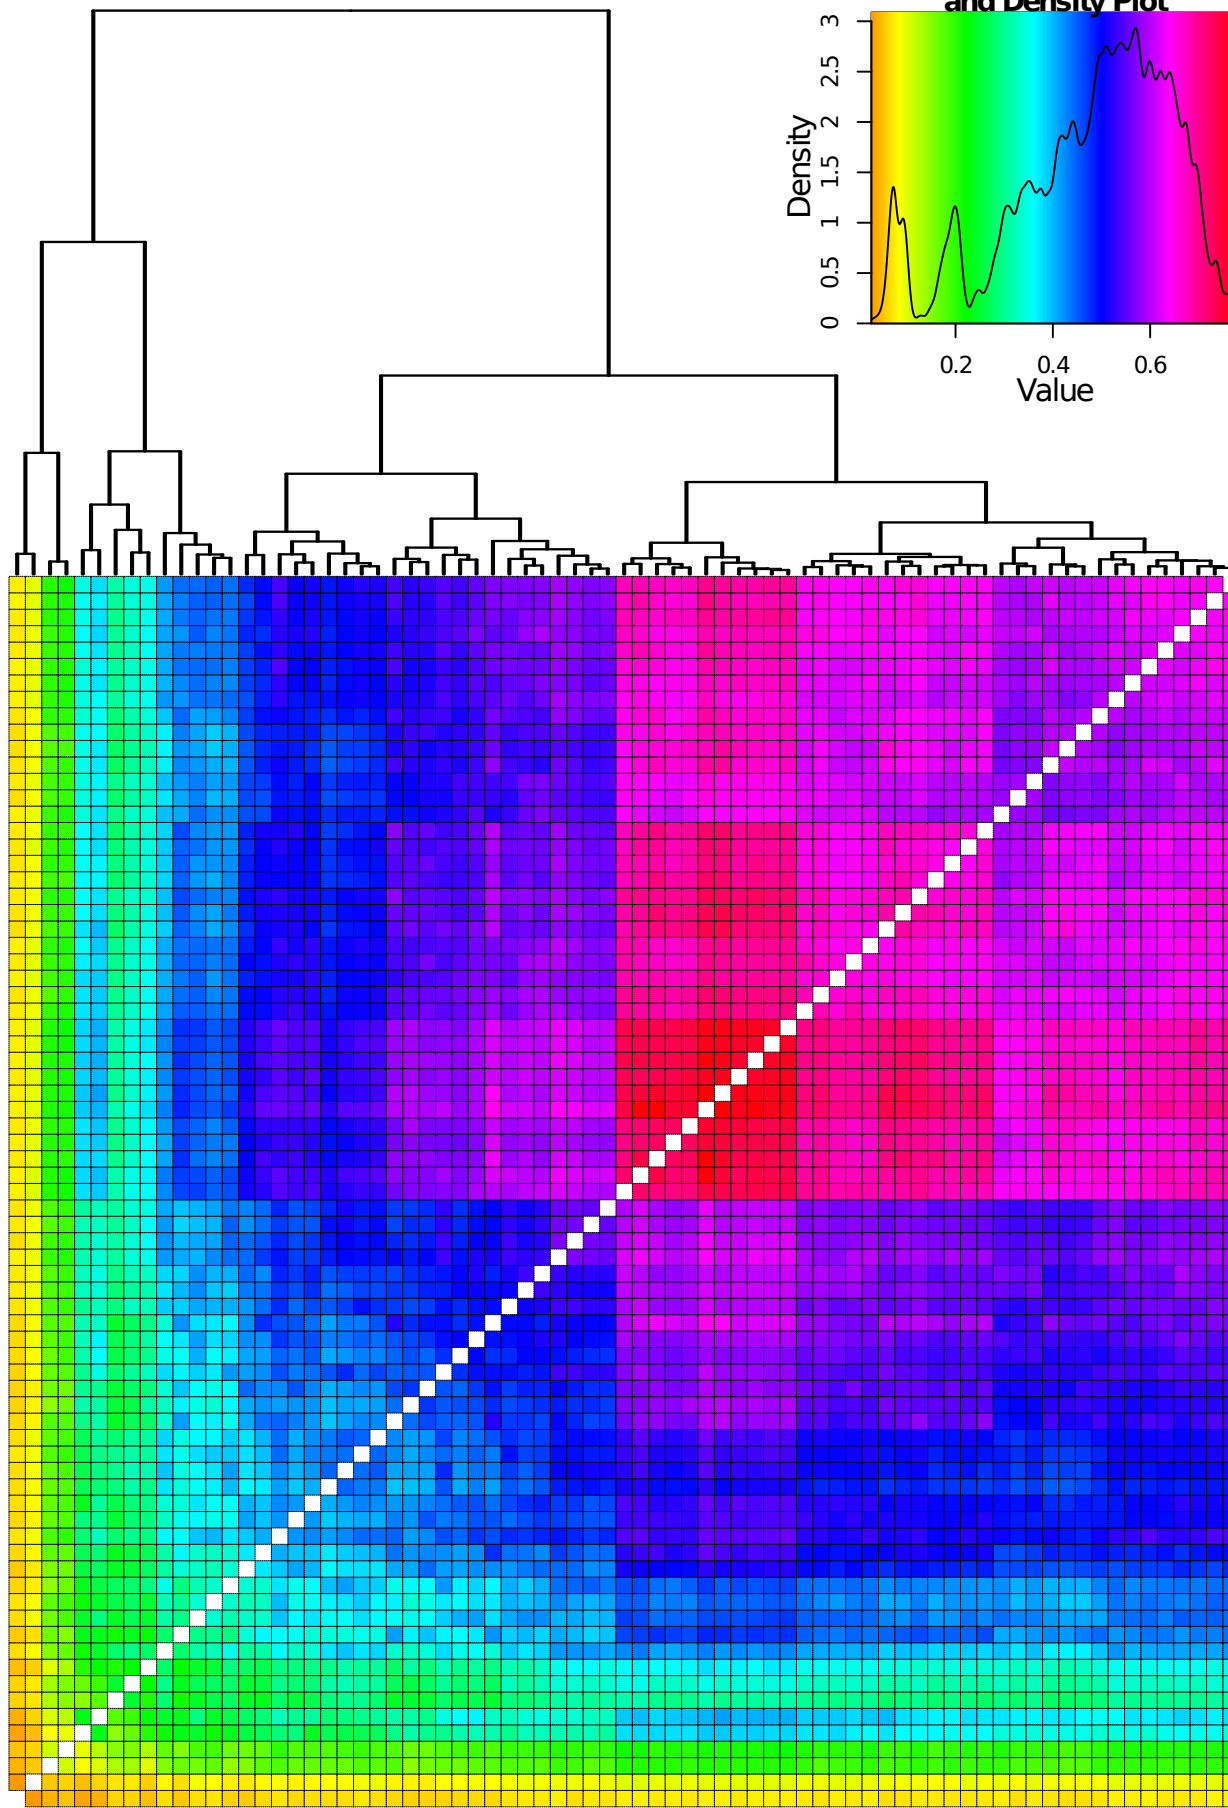

*Calileptoneta* sp.  
*Loxosceles* sp.  
*Frontinella communis*  
*Sergiolus capulatus*  
*Kukulcania hibernalis*  
*Pholcus* sp.  
*Theridion* sp.  
*Hypochilus pococki*  
*Liphistius malayensis*  
*Uloborus glomulosus*  
*Neoscona arabesca*  
*Scytodes thoracica*  
*Ariahita punctulata*  
*Callobius* sp.  
*Agelenopsis emertoni*  
*Microdipoena guttata*  
*Segestria* sp.  
*Philopenella herediae*  
*Stegodyphus mimosarum*  
*Latrodectus tredecimguttatus*  
*Gasteracantha hasselti*  
*Pimoa* sp.  
*Oecobius navus*  
*Habronattus signatus*  
*Badumna longinquus*  
*Schizocosa rovnerei*  
*Cicurina vibora*  
*Nephila clavipes*  
*Tetragnatha versicolor*  
*Nesticus cooperi*  
*Micrathena gracilis*  
*Ero leonina*  
*Megahexura fulva*  
*Verrucosa arenata*  
*Leucauge venusta*  
*Acanthoscurria geniculata*  
*Sphodros rufipes*  
*Deinopis longipes*  
*Promyrmekiaphila clathrata*  
*Hebestatis theveneti*  
*Brachythele longitarsus*  
*Microhexura montivaga*  
*Peucetia longipalpis*  
*Homalonychus theologus*  
*Antrodiaetus unicolor*  
*Mastigoproctus giganteus*  
*Hibana* sp.  
*Dolomedes triton*  
*Trichopelma laselya*  
*Trachelas tranquillus*  
*Macracantha arcuata*  
*Tetranychus cinnabarinus*  
*Cyclocosmia truncata*  
*Aliatypus coylei*  
*Damarchus* sp.  
*Aptostichus atomarius*  
*Metaltella simoni*  
*Amaurobius ferox*  
*Pholcus phalangioides*  
*Damon variegatus*  
*Pisaurina mira*  
*Aphonopelma iviei*  
*Calponia harrisonfordi*  
*Misumenoides formosipes*  
*Ixodes scapularis*  
*Paratropis* sp.  
*Aptostichus stephencolberti*  
*Idiops bersebaensis*  
*Pionothele* nsp.  
*Calymmaria persica*  
*Metaltella simoni*  
*Dysdera crocata*  
*Centruroides vittatus*  
*Liphistius* sp.  
*Digueta* sp.
