# Supplementary material for: Spider phylogenomics: untangling the Spider Tree of Life
Source: PeerJ journal article supplement (doi:10.7717/peerj.1719), 2016-02-23

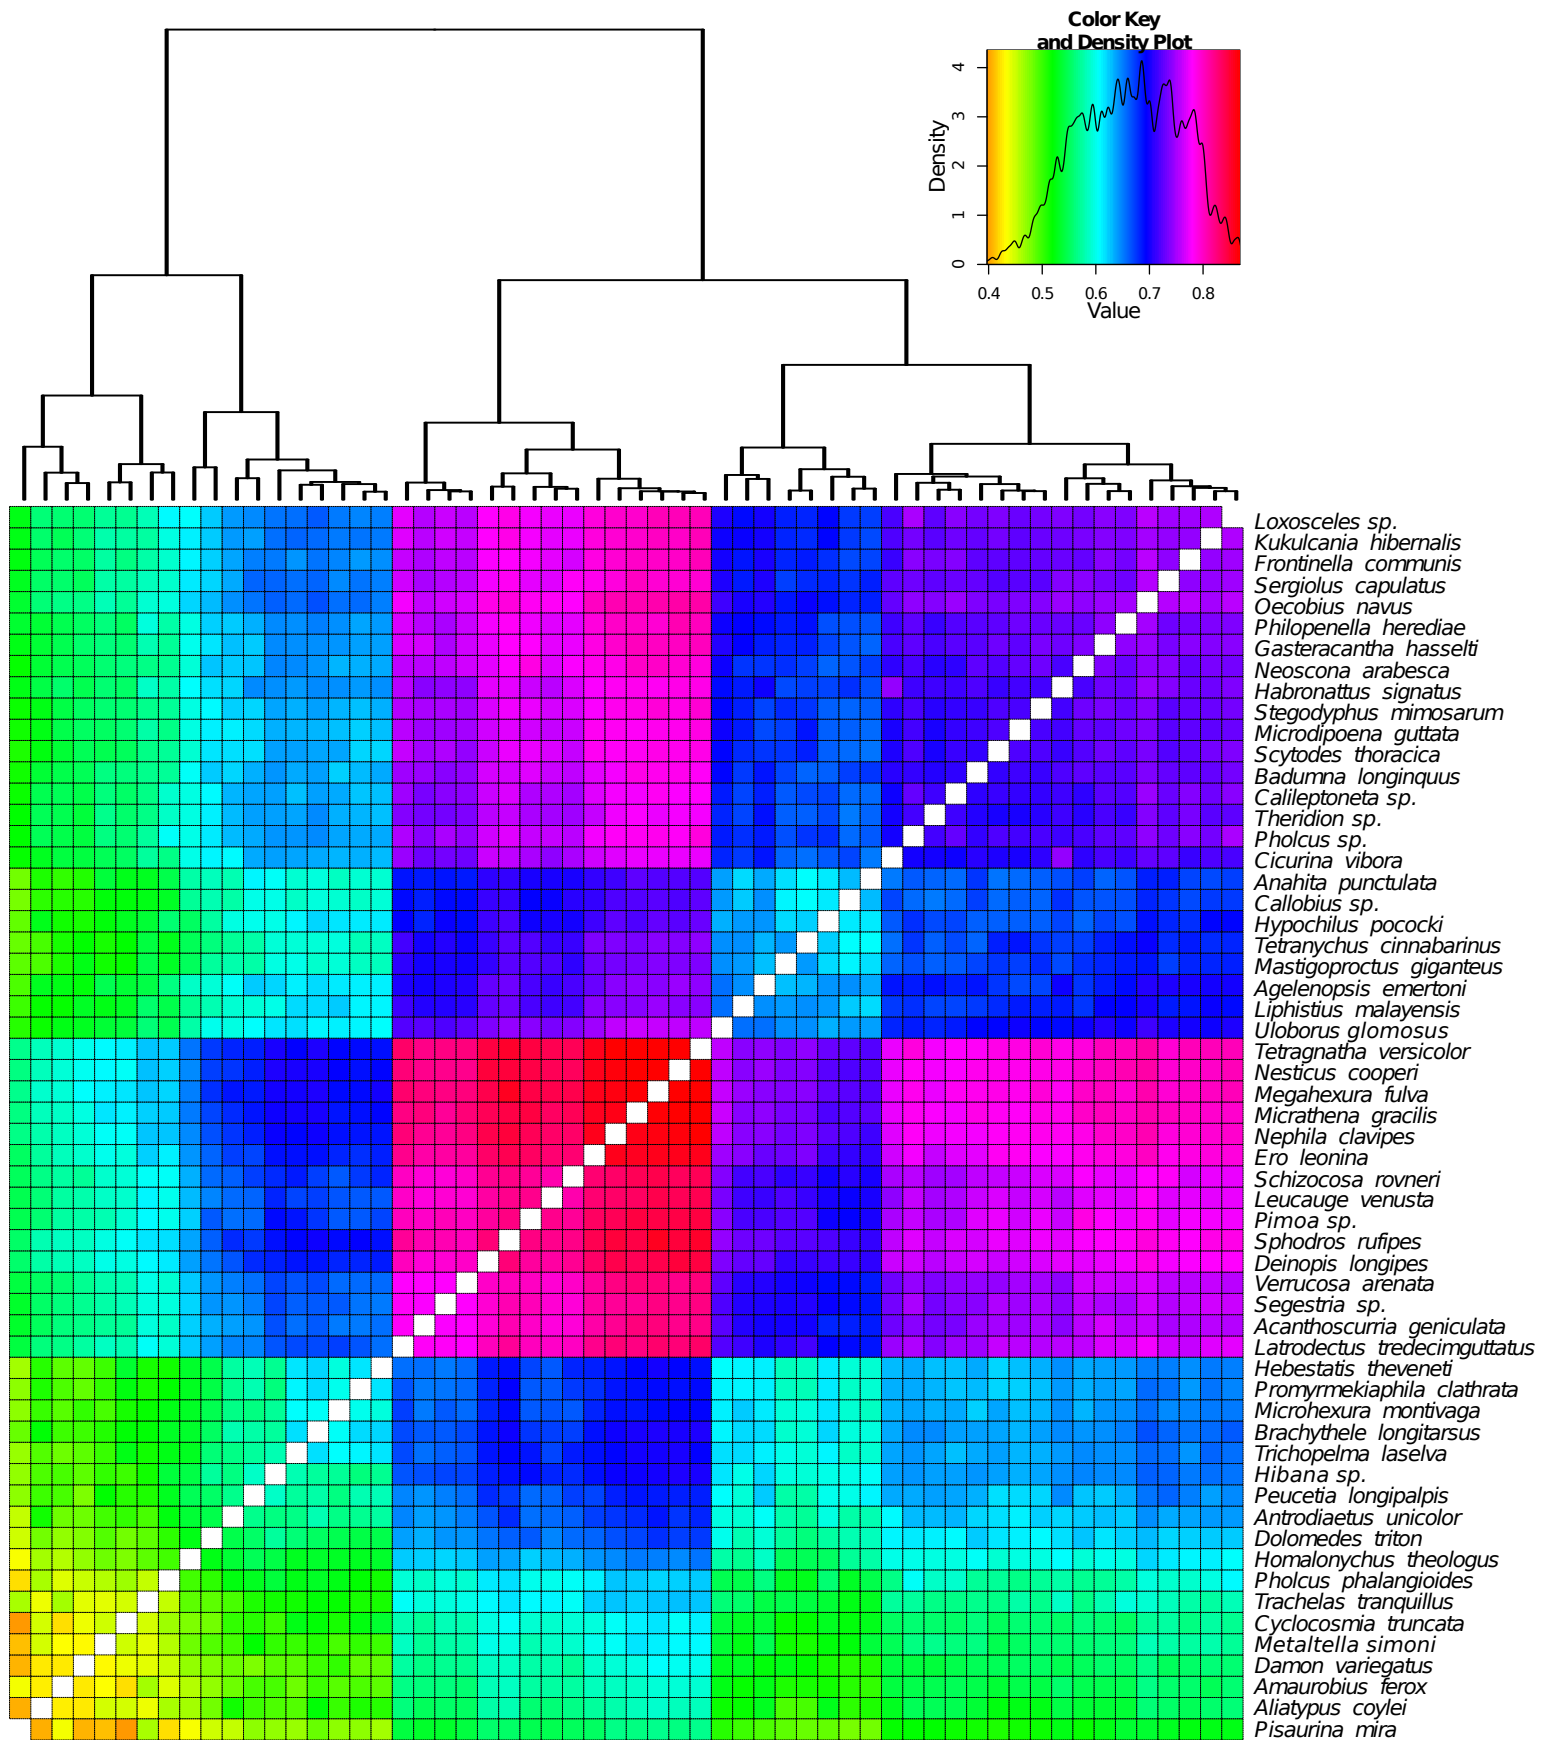

Supplement: SupplementalFigure6.pdf [file SupplementalFigure6.pdf]
